# Supplementary material for: A new convenient synthetic route towards 2-(hetero)aryl-substituted thieno[3,2-b]indoles using Fischer indolization
Source: Royal Society of Chemistry journal article supplement (doi:10.1039/c8ob01110a), 2018-01-01

## Supporting Information

### A new convenient synthetic route towards 2-(hetero)aryl-substituted thieno[3,2-*b*]indoles using Fischer indolization

Roman A. Irgashev\*, Alexander S. Steparuk, Gennady L. Rusinov

Postovsky Institute of Organic Synthesis, Ural Division of the Russian Academy of Sciences,  
Ekaterinburg, 620990, Russia

\*E-mail: [irgashev@ios.uran.ru](mailto:irgashev@ios.uran.ru)

#### Table of content

|                                                                                                                                                                 |    |
|-----------------------------------------------------------------------------------------------------------------------------------------------------------------|----|
| General information .....                                                                                                                                       | S2 |
| General procedure for preparation of methyl $\alpha$ -bromocinnamates (3a-k) .....                                                                              | S2 |
| General procedure for preparation of methyl 2-bromo-3-(thiophen-2-yl)acrylate (3l) and methyl 2-bromo-3-(5-bromothiophen-2-yl)acrylate (3m).....                | S3 |
| General procedure for preparation of diethyl 3,3'-(1,4-phenylene)bis(2-bromoacrylate) (8a) and diethyl 3,3'-(thiophene-2,5-diyl)bis(2-bromoacrylate) (8b) ..... | S3 |
| References .....                                                                                                                                                | S4 |
| Copies of $^1\text{H}$ , $^{19}\text{F}$ and $^{13}\text{C}$ NMR spectra of new compounds .....                                                                 | S5 |

## General information

The purity of the obtained compounds was evaluated by GC-MS analysis, performed on an Agilent GC 7890A MS 5975C Inert XL EI/CI GC-MS spectrometer. All used solvents were dried and distilled per standard procedures. Bromine, triethylamine and thionyl chloride were obtained from commercial sources and used as received. 2-Bromo-3-(thiophen-2-yl)acrylic and 2-bromo-3-(5-bromothiophen-2-yl)acrylic acids were prepared from 3-(thiophen-2-yl)acrylic acid according to the previously described procedures.<sup>1</sup> Diethyl 3,3'-(1,4-phenylene)diacrylate and 3,3'-(thiophene-2,5-diyl)diacrylate were prepared by esterification of corresponding diacrylic acids according to the previously described procedure.<sup>2</sup> Silica gel 0.040–0.063 mm (230–400 mesh) was used to purify compounds.

## General procedure for preparation of methyl $\alpha$ -bromocinnamates (3a-k)

| <div><div><div>Ar</div><div><div><div></div><div></div></div></div><div><div>CO<sub>2</sub>Me</div></div></div><div><div>1. Br<sub>2</sub> (1.04 equiv) / CHCl<sub>3</sub>, 2 h at rt</div><div>2. Et<sub>3</sub>N (2 equiv) / CHCl<sub>3</sub>, 2 h at reflux</div></div><div><div>Ar</div><div><div><div></div><div></div></div></div><div><div>CO<sub>2</sub>Me</div></div><div>Br</div></div><div>3a-k</div></div> |                        |           |
|------------------------------------------------------------------------------------------------------------------------------------------------------------------------------------------------------------------------------------------------------------------------------------------------------------------------------------------------------------------------------------------------------------------------|------------------------|-----------|
| methyl $\alpha$ -bromocinnamate <b>3</b>                                                                                                                                                                                                                                                                                                                                                                               | Ar                     | yield (%) |
| <b>3a</b>                                                                                                                                                                                                                                                                                                                                                                                                              | phenyl                 | 87        |
| <b>3b</b>                                                                                                                                                                                                                                                                                                                                                                                                              | 4-fluorophenyl         | 87        |
| <b>3c</b>                                                                                                                                                                                                                                                                                                                                                                                                              | 4-bromophenyl          | 88        |
| <b>3d</b>                                                                                                                                                                                                                                                                                                                                                                                                              | 4-methoxyphenyl        | 98        |
| <b>3e</b>                                                                                                                                                                                                                                                                                                                                                                                                              | 4-hexyloxyphenyl       | 94        |
| <b>3f</b>                                                                                                                                                                                                                                                                                                                                                                                                              | 3,4,5-trimethoxyphenyl | 95        |
| <b>3g</b>                                                                                                                                                                                                                                                                                                                                                                                                              | 2-fluorophenyl         | 97        |
| <b>3h</b>                                                                                                                                                                                                                                                                                                                                                                                                              | 2-chlorophenyl         | 98        |
| <b>3i</b>                                                                                                                                                                                                                                                                                                                                                                                                              | 2-bromophenyl          | 97        |
| <b>3j</b>                                                                                                                                                                                                                                                                                                                                                                                                              | 2-methoxyphenyl        | 91        |
| <b>3k</b>                                                                                                                                                                                                                                                                                                                                                                                                              | 1-naphthyl             | 96        |

Br<sub>2</sub> (3.2 ml, 62.4 mmol) in dry CHCl<sub>3</sub> (20 ml) was added dropwise to methyl ester of appropriate cinnamic acid (60 mmol) in dry CHCl<sub>3</sub> (80 ml) at 0 °C during 20 min with continuous stirring, and the resulting solution was stirred for another 2 h at room temperature. After that, the reaction mixture was cooled to 0 °C and dropwise treated with Et<sub>3</sub>N (16.8 ml, 120 mmol) at this temperature. The obtained dark-brown solution was stirred and heated at reflux for 2 h, then it was poured into ice-cold water (100 ml) with conc. HCl (6 ml), and this biphasic system was intensively shaken several times. The organic layer was separated, washed with water (4×50 ml), dried with CaCl<sub>2</sub> and eluted through a short silica gel plug (2 cm×4 cm) with CHCl<sub>3</sub> (2×20 ml). The filtrate was concentrated under reduced pressure and the residual oil was dried at 60 °C in vacuum (11 mbar) to give methyl  $\alpha$ -bromocinnamate **3** (mixture of Z-E stereoisomers according to GC-MS analysis). All the substances **3** prepared in this manner were pure enough to be used in the next step without further purification.

**General procedure for preparation of methyl 2-bromo-3-(thiophen-2-yl)acrylate (**3l**) and methyl 2-bromo-3-(5-bromothiophen-2-yl)acrylate (**3m**)**

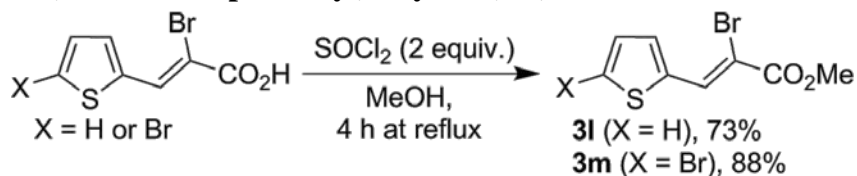

SOCl<sub>2</sub> (8.7 ml, 120 mmol) was added dropwise to a stirred suspension of 2-bromo-3-(thiophen-2-yl)acrylic acid (14 g, 60 mmol) or 2-bromo-3-(5-bromothiophen-2-yl)acrylic acid (18.72 g, 60 mmol) in dry MeOH (100 ml) at 0 °C during 30 min, and the obtained solution was stirred and heated at reflux for 4 h (CAUTION: significant SO<sub>2</sub> evolution). After this time, in the case of compound **3l**, the reaction mixture was concentrated in vacuum and the residue was treated with benzene (100 ml) and water (100 ml). The organic layer was separated, washed with saturated aqueous NaHCO<sub>3</sub> solution (2×25 ml), water (50 ml) and dried with CaCl<sub>2</sub>. Benzene was removed under reduced pressure and the residue was additionally dried at 60 °C in vacuum (11 mbar) to afford pure ester **3l** (10.82 g, 73%) as the light-yellow oil. In the case of compound **3m**, the reaction mixture was cooled in an ice bath and the formed crystals were filtered, washed with cold MeOH (2×10 ml) and dried at room temperature to give pure ester **3m** (17.21 g, 88%).

**General procedure for preparation of diethyl 3,3'-(1,4-phenylene)bis(2-bromoacrylate) (**8a**) and diethyl 3,3'-(thiophene-2,5-diyl)bis(2-bromoacrylate) (**8b**)**

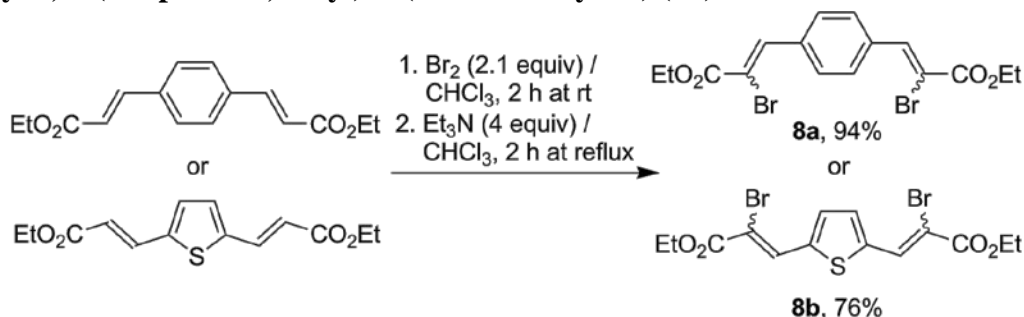

Br<sub>2</sub> (2.2 ml, 43 mmol) in dry CHCl<sub>3</sub> (25 ml) was added dropwise to a stirred solution of diethyl 3,3'-(1,4-phenylene)diacrylate (5.62 g, 20.5 mmol) or diethyl 3,3'-(thiophene-2,5-diyl)diacrylate (5.75 g, 20.5 mmol) in dry CHCl<sub>3</sub> (50 ml) at 0 °C during 15 min, and stirring was continued for another 2 h at room temperature. Then, the mixture was cooled to 0 °C and dropwise treated with Et<sub>3</sub>N (11.4 ml, 82 mmol) at this temperature. The obtained dark-brown solution was stirred and heated at reflux for 2 h, then it was poured into ice-cold water (75 ml) with conc. HCl (5 ml), and this biphasic system was intensively shaken several times. The CHCl<sub>3</sub> layer was separated, washed with water (4×30 ml), dried with CaCl<sub>2</sub> and eluted through a short silica gel plug (2 cm×4 cm) with CHCl<sub>3</sub> (25 ml). The filtrate was concentrated under reduced pressure and the residual oil was dried at 60 °C in vacuum (11 mbar) to yield diethyl 3,3'-(1,4-phenylene)bis(2-bromoacrylate) **8a** (8.33 g, 94%) or diethyl 3,3'-(thiophene-2,5-diyl)bis(2-bromoacrylate) **8b** (7.6 g, 76%).

(thiophene-2,5-diyl)bis(2-bromoacrylate) **8b** (6.83 g, 76%), both **8a** and **8b** as mixture of (E,E)-(Z,E)-(Z,Z) stereoisomers according to GC-MS analysis. The obtained diesters were pure enough to be used in the next step without further purification.

## References

1. H. Keskin, R. E. Miller and F. F. Nord, *J. Org. Chem.*, 1951, **16**, 199.
2. H. Pohl, *J. fur Prakt. Chemier Prakt. Chemie*, 1934, **141**, 44.

$^1\text{H}$  NMR (solvent:  $\text{DMSO}-d_6$ )

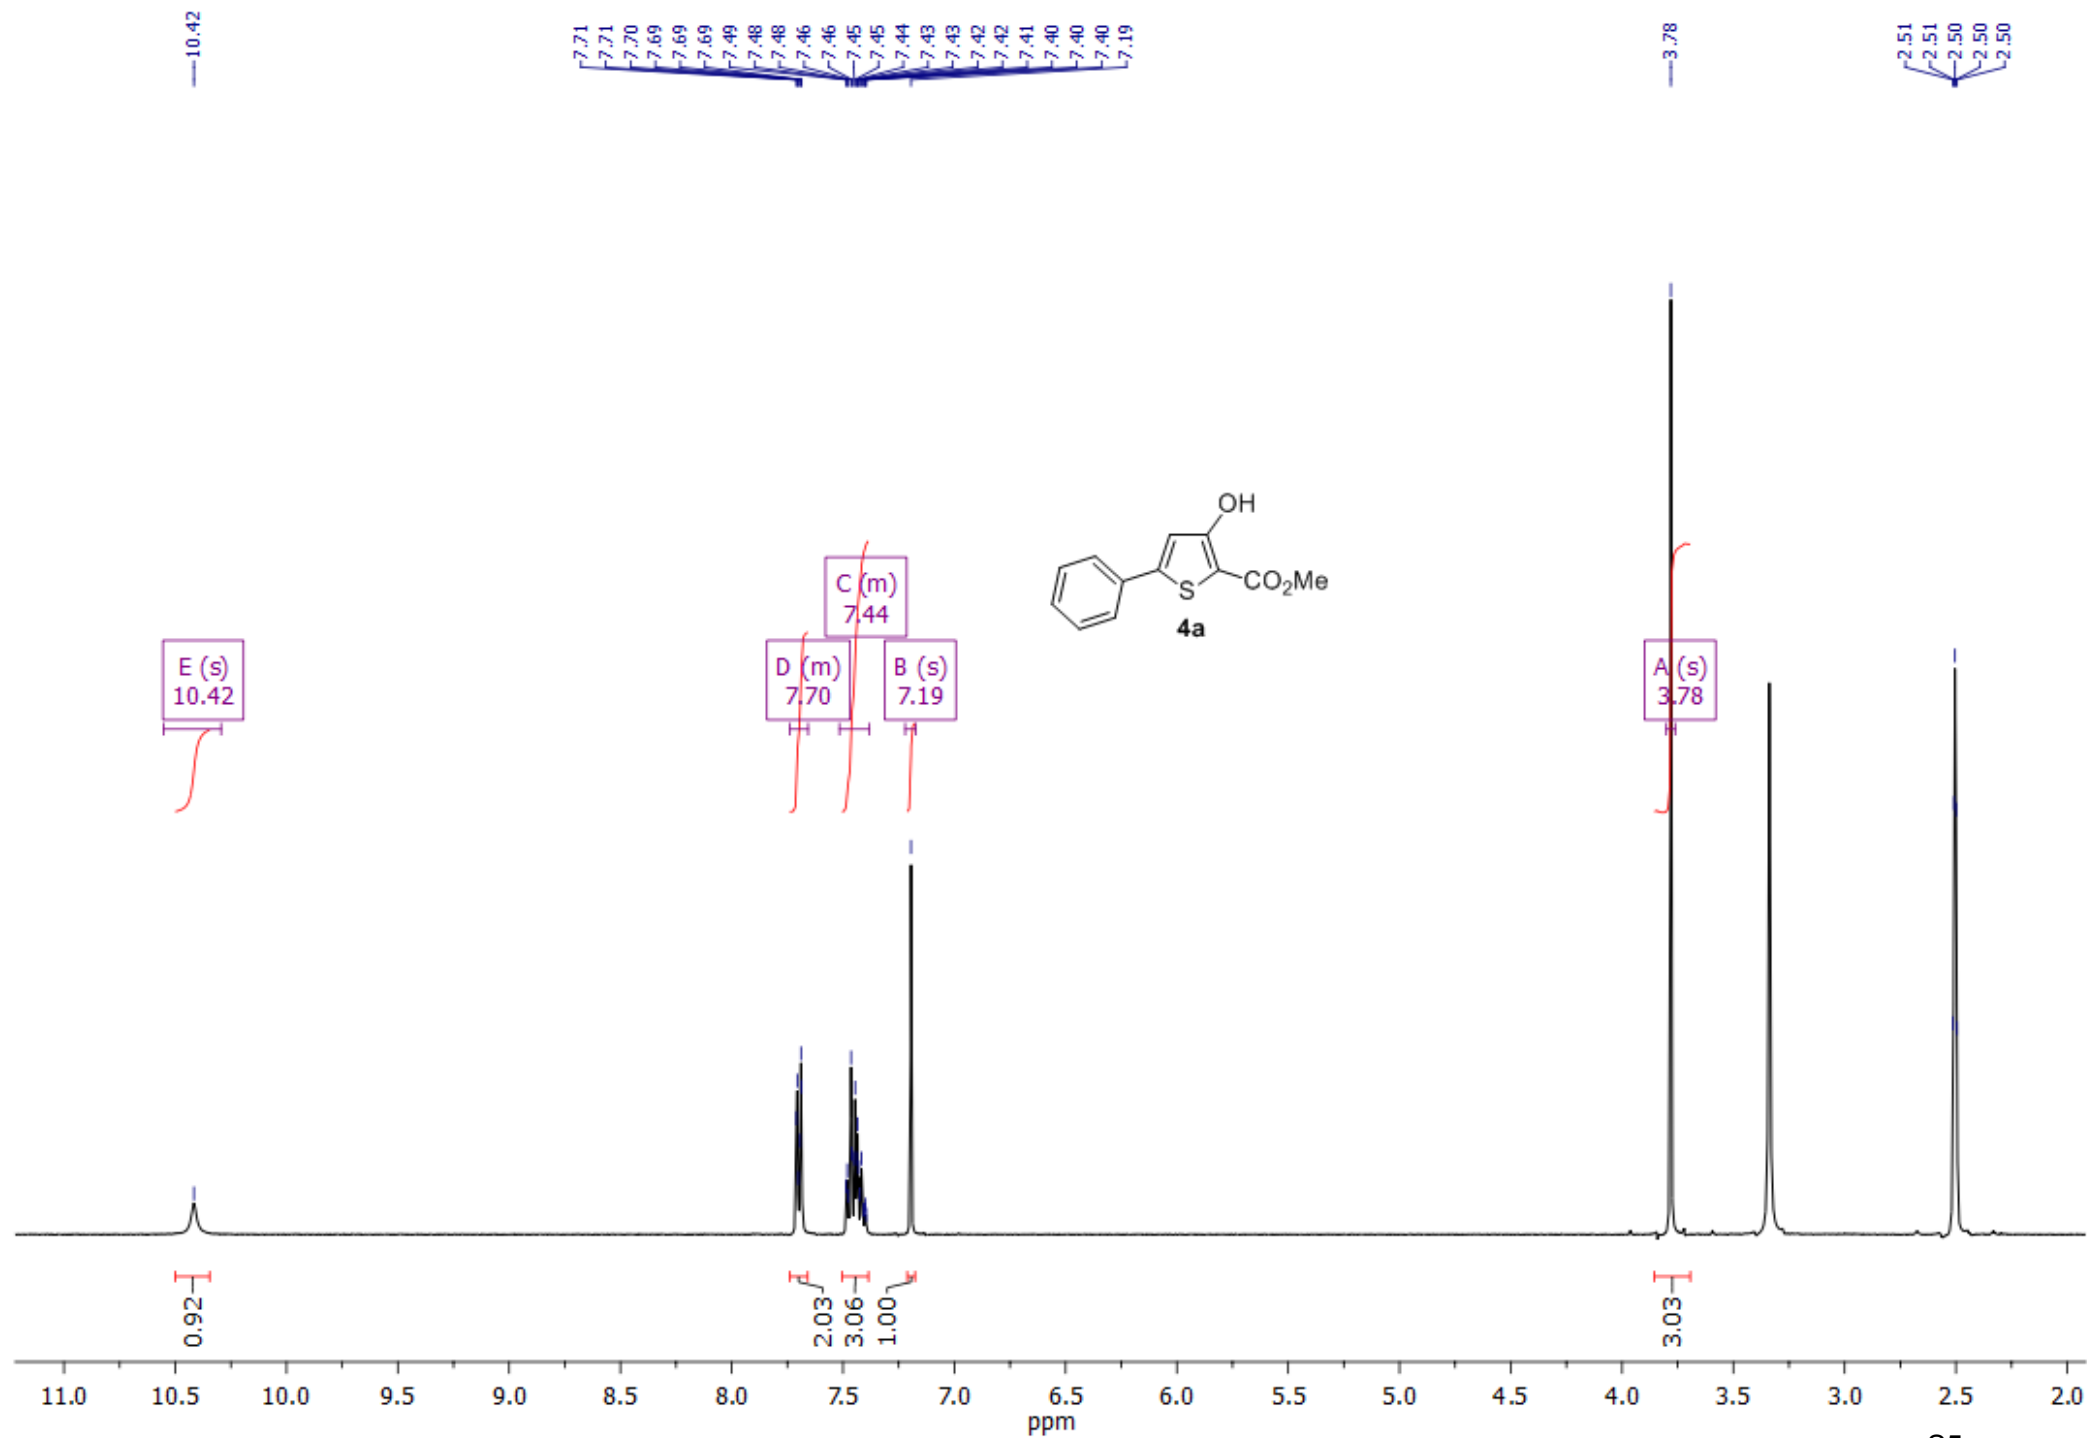

<sup>13</sup>C NMR (solvent: DMSO-*d*<sub>6</sub>)

162.9  
161.5  
147.1  
132.4  
129.3  
129.2  
125.5  
116.7  
104.0  
51.5

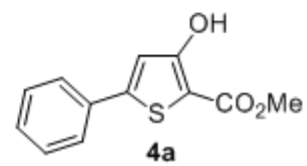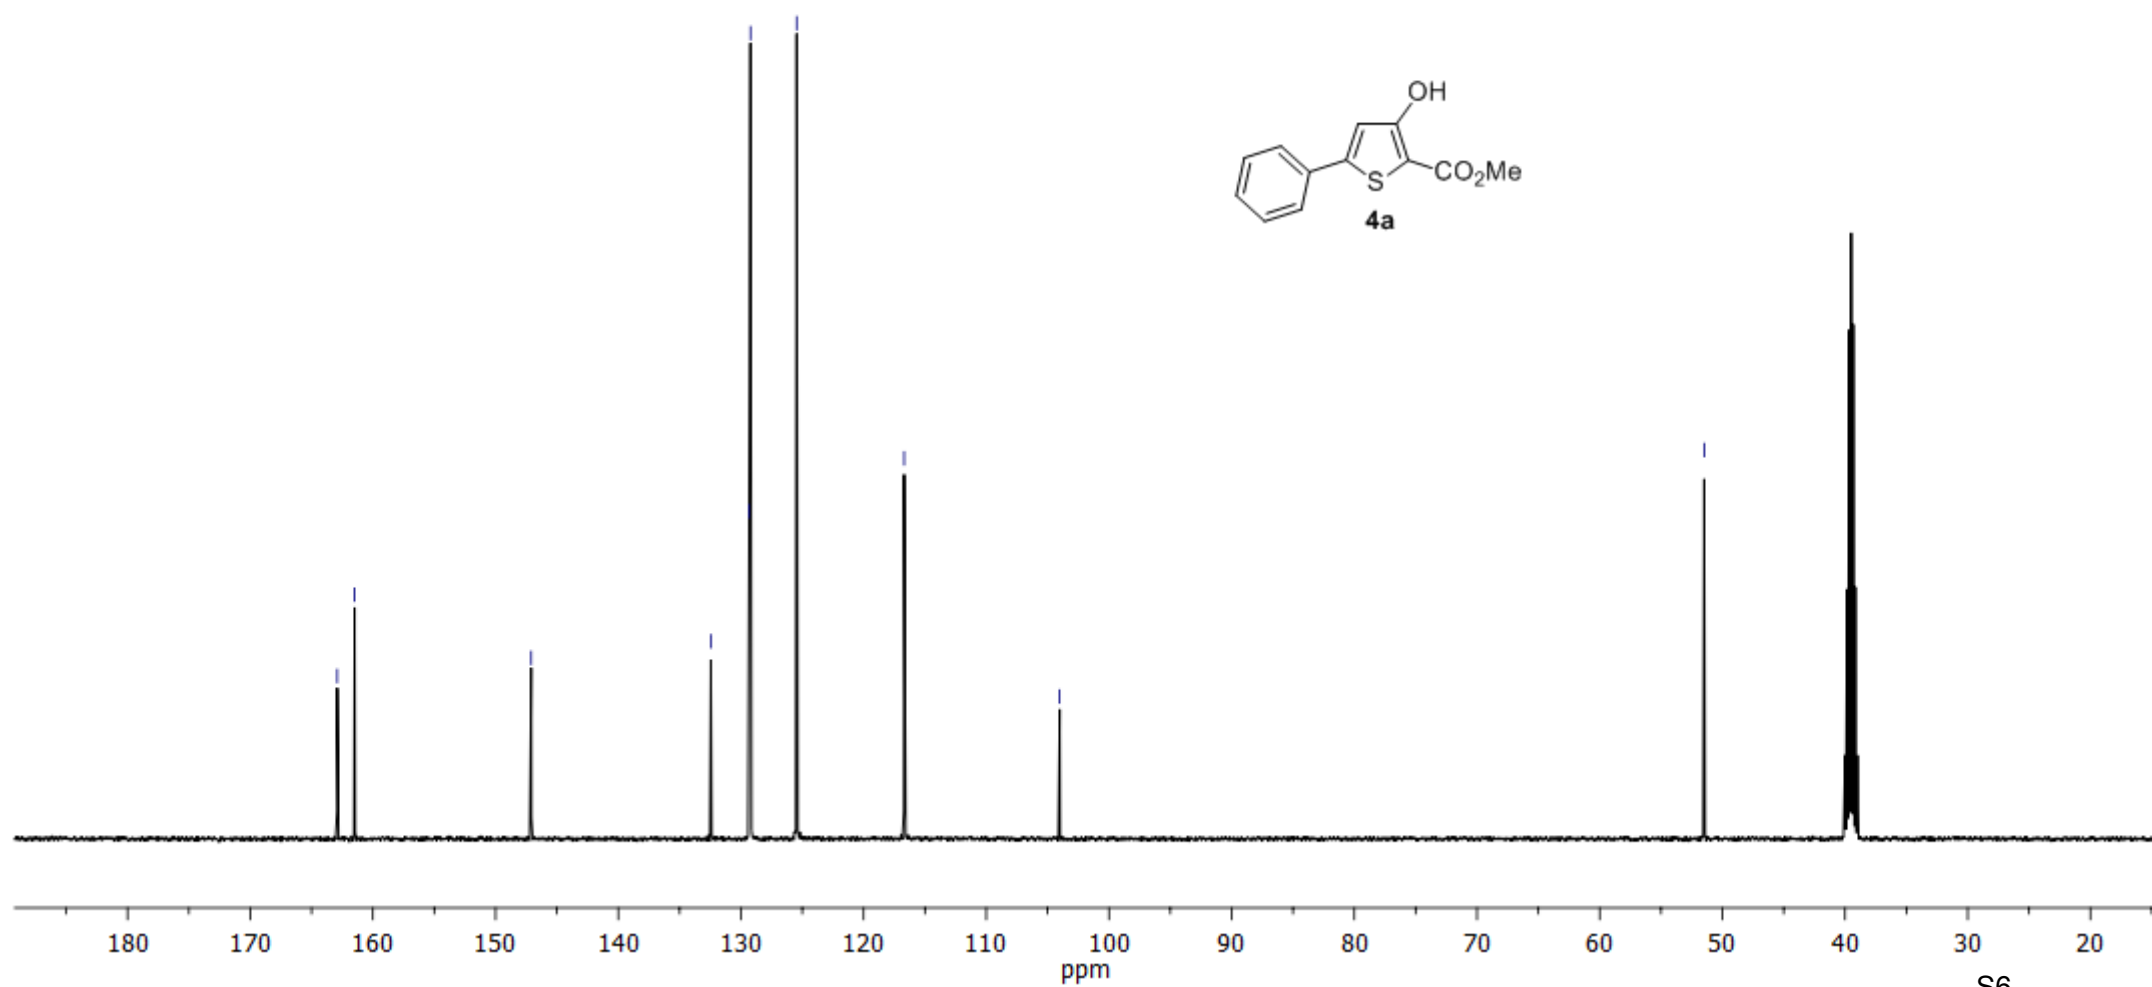

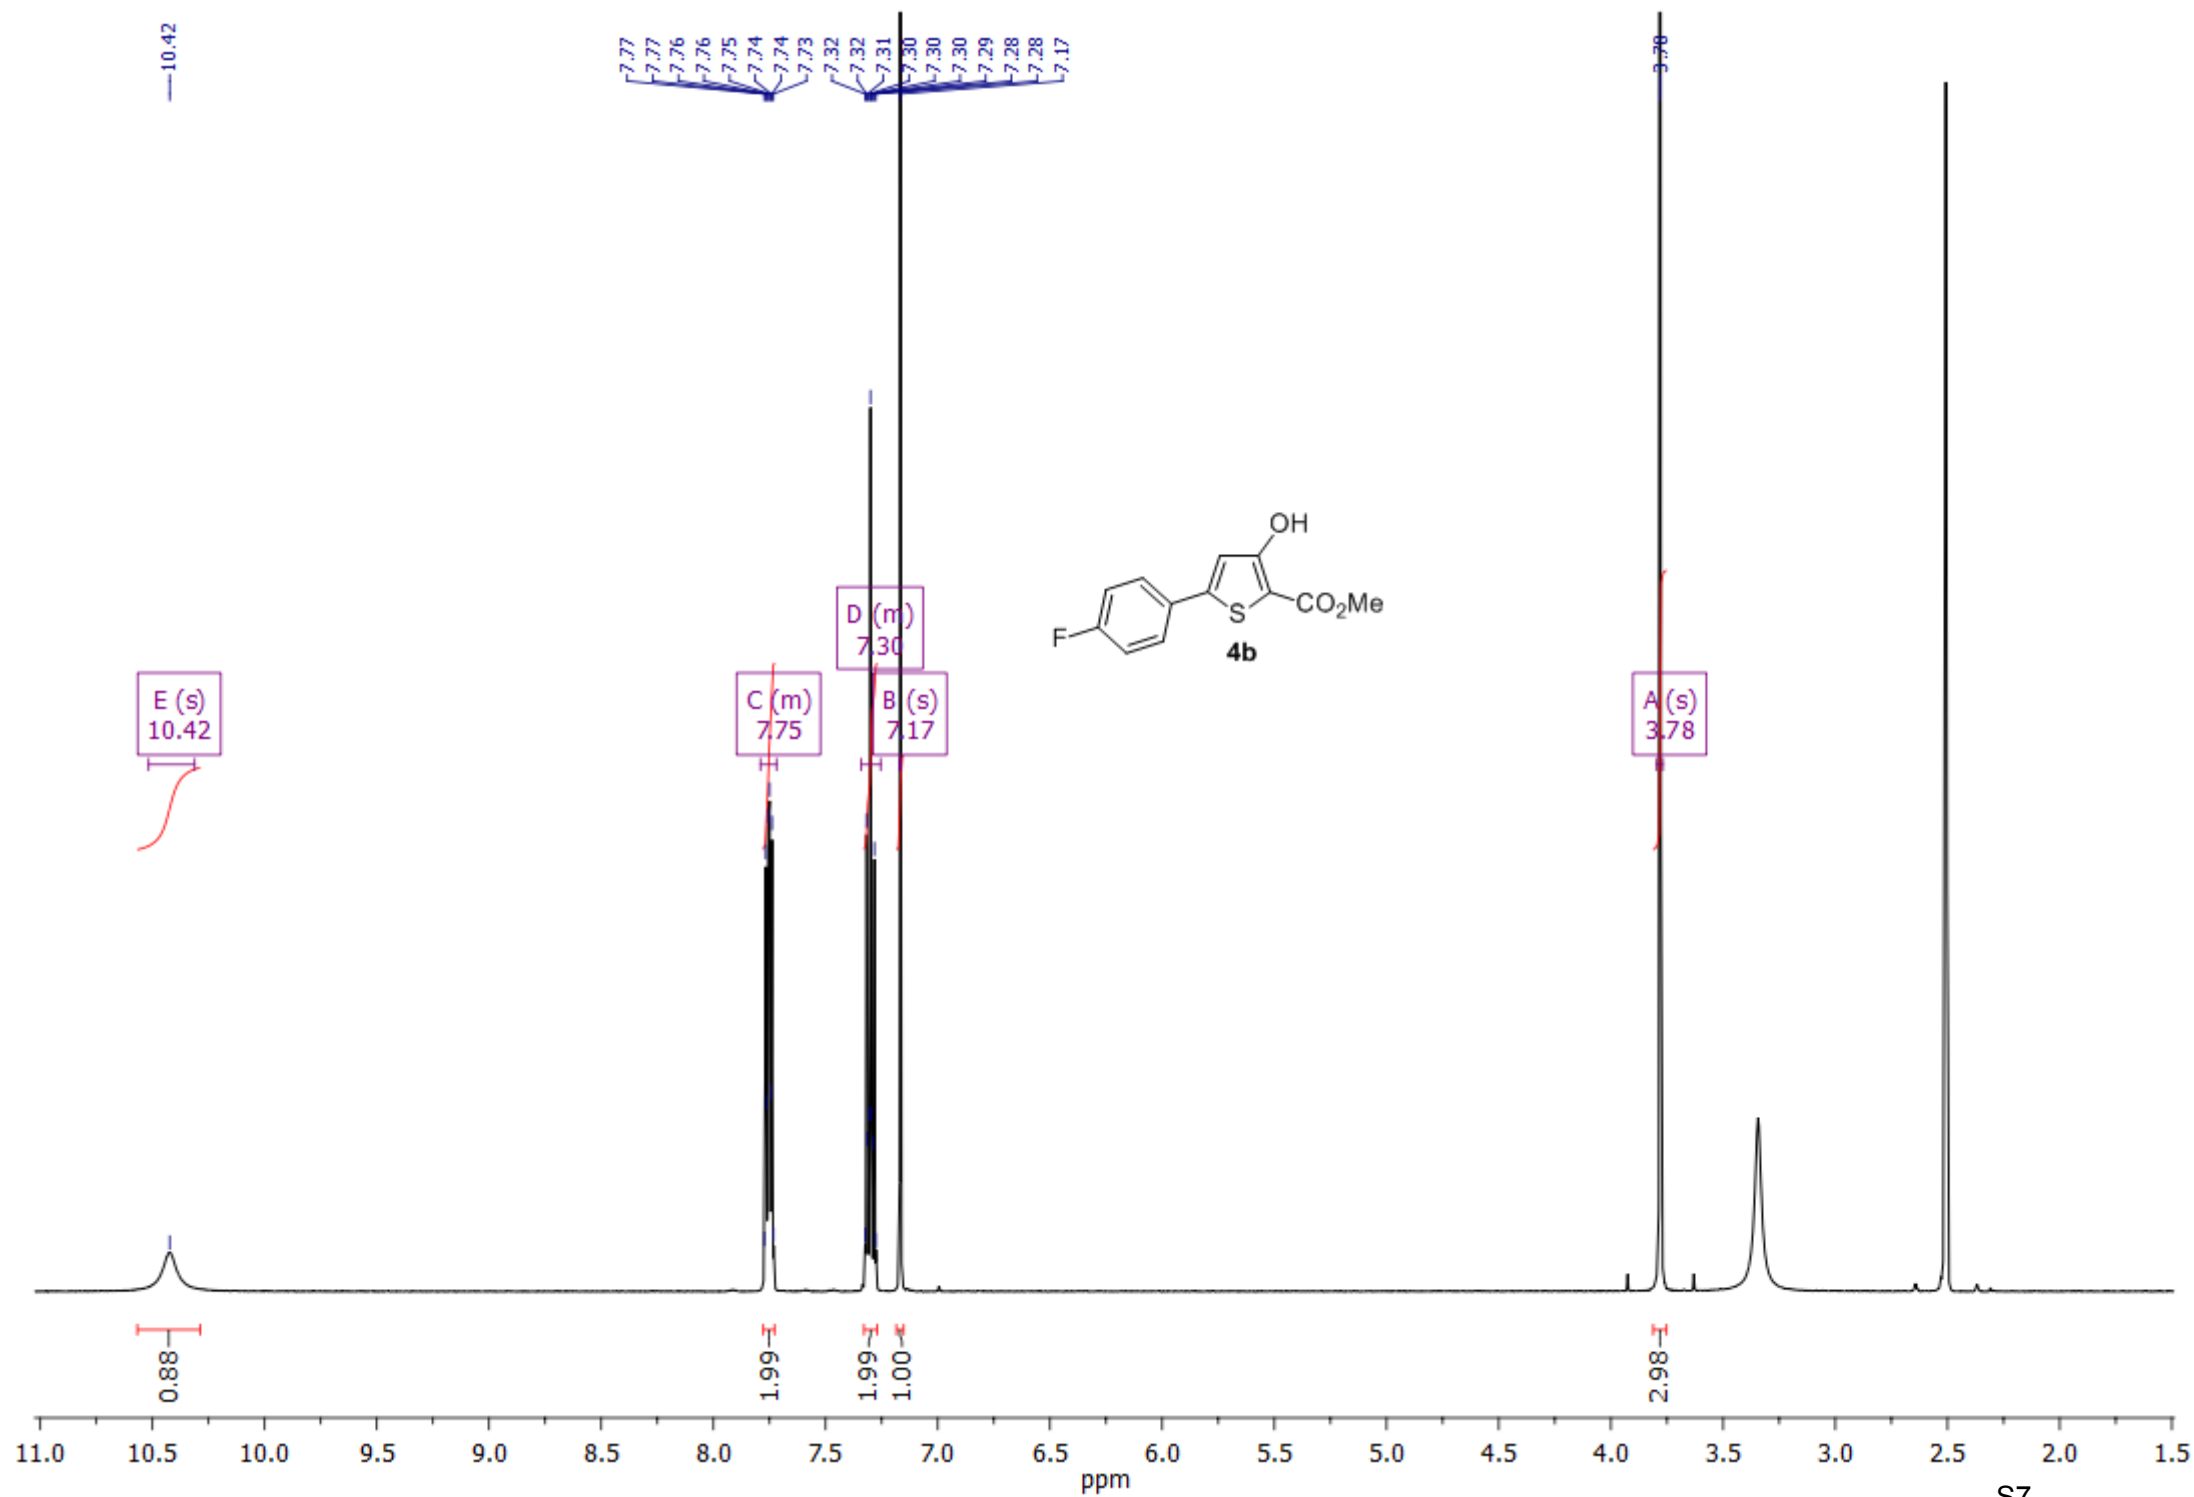

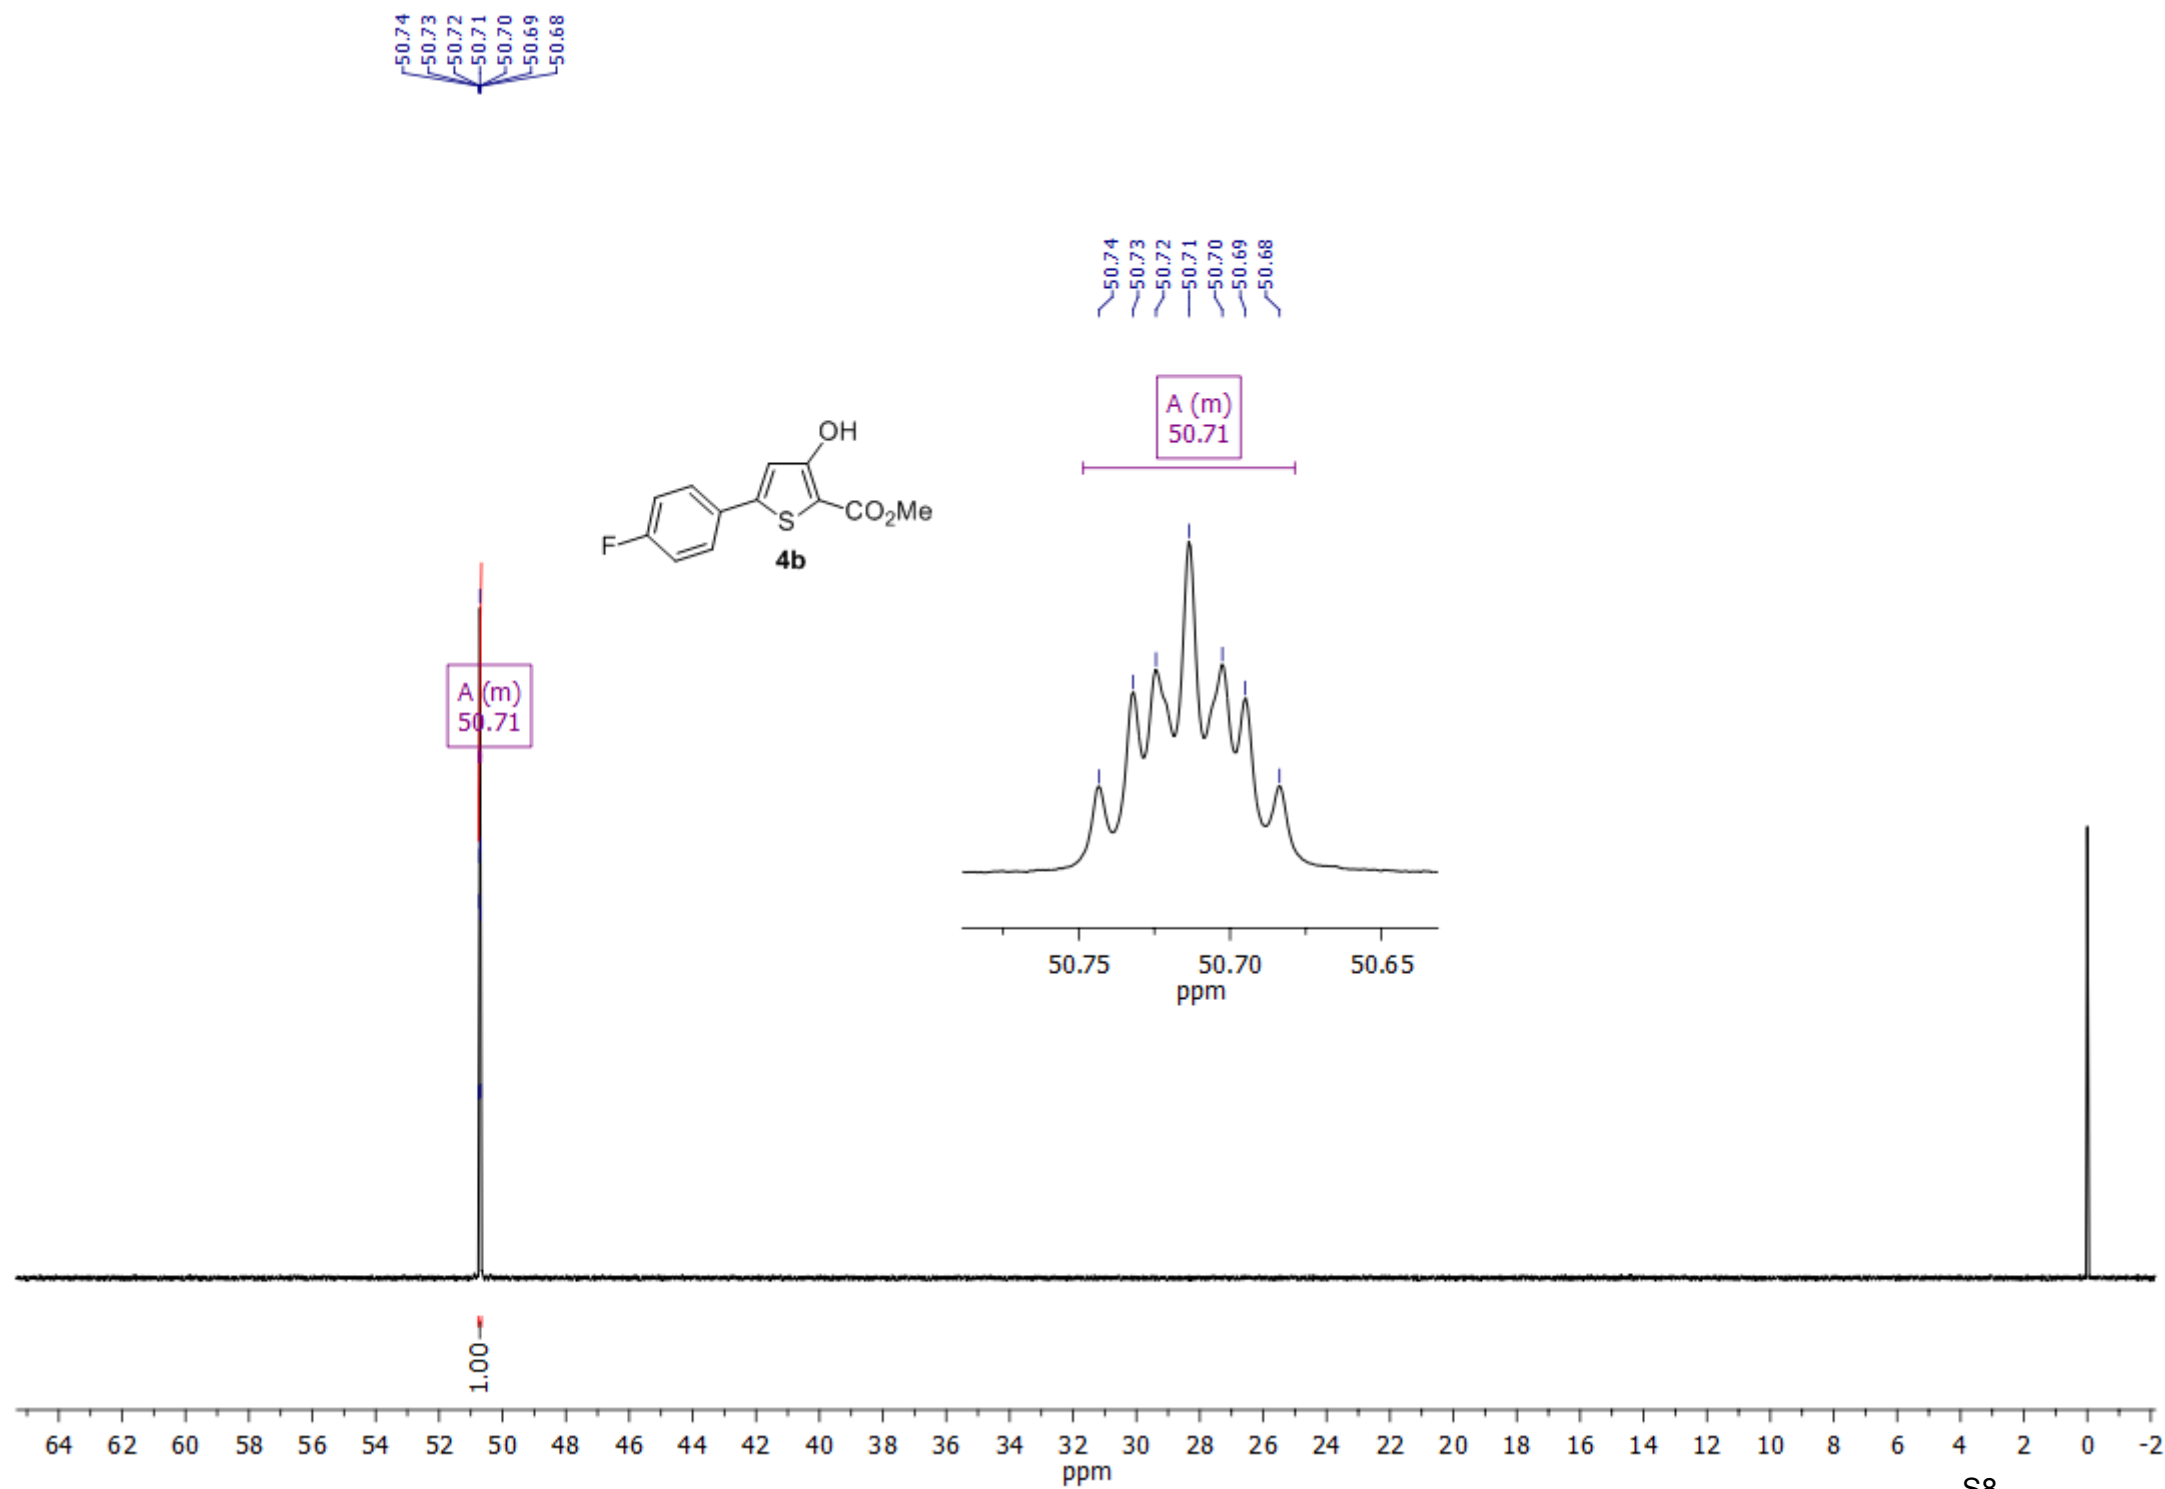



<sup>13</sup>C NMR (solvent: DMSO-*d*<sub>6</sub>)

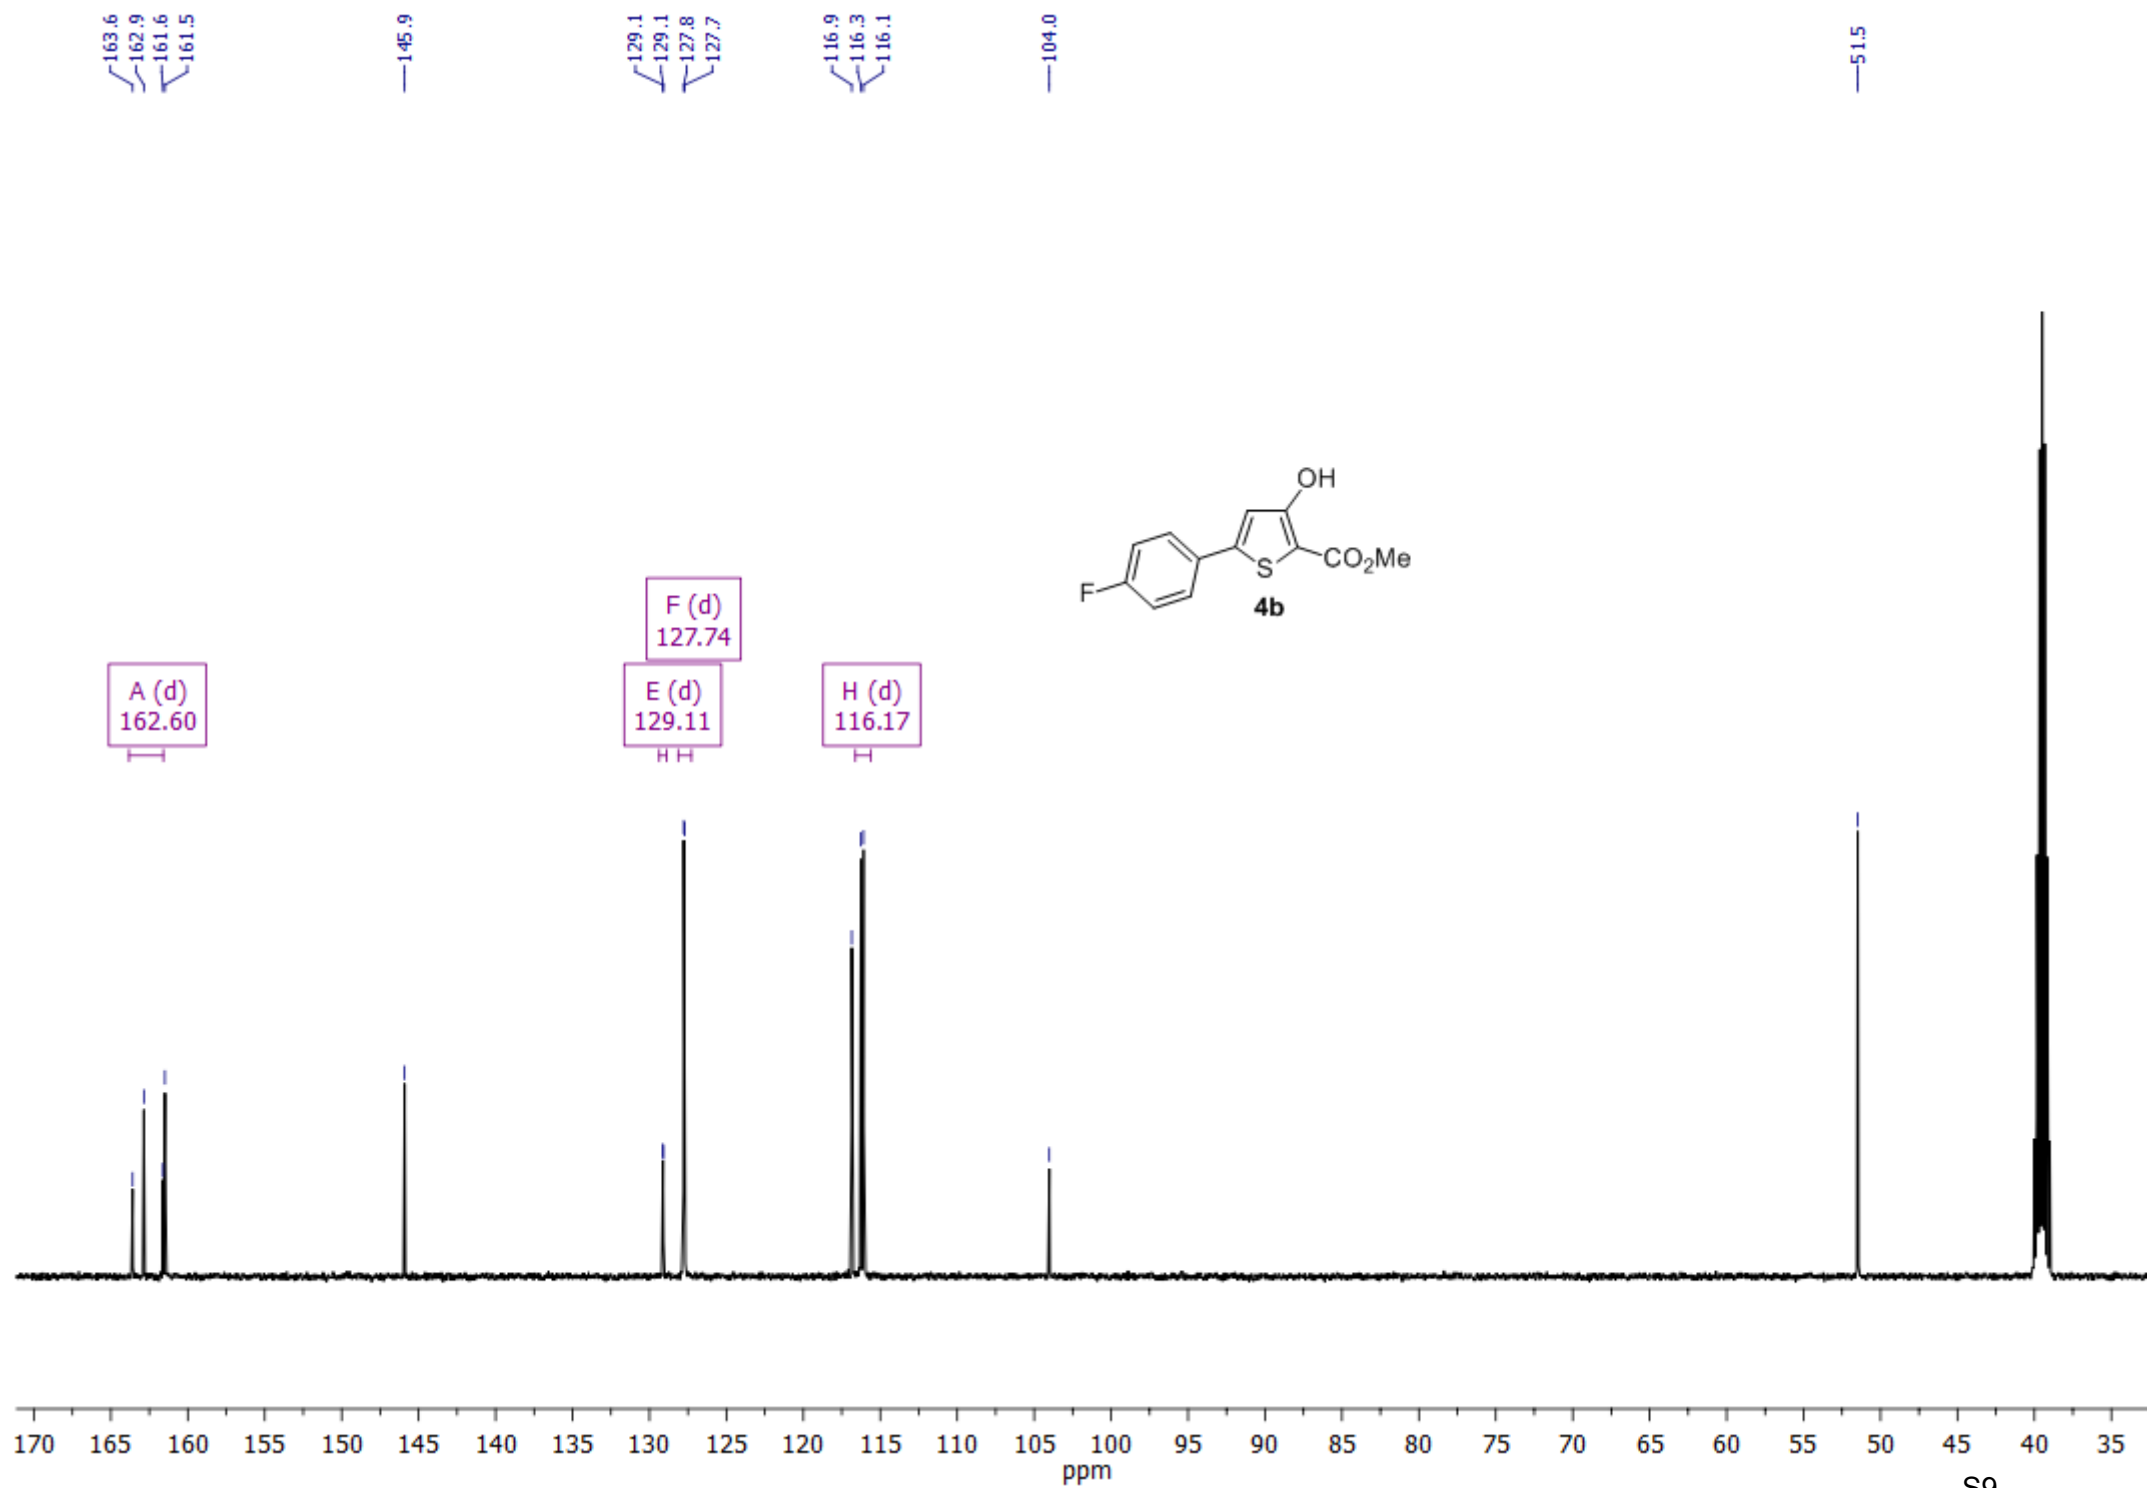

<sup>1</sup>H NMR (solvent: DMSO-*d*<sub>6</sub>)

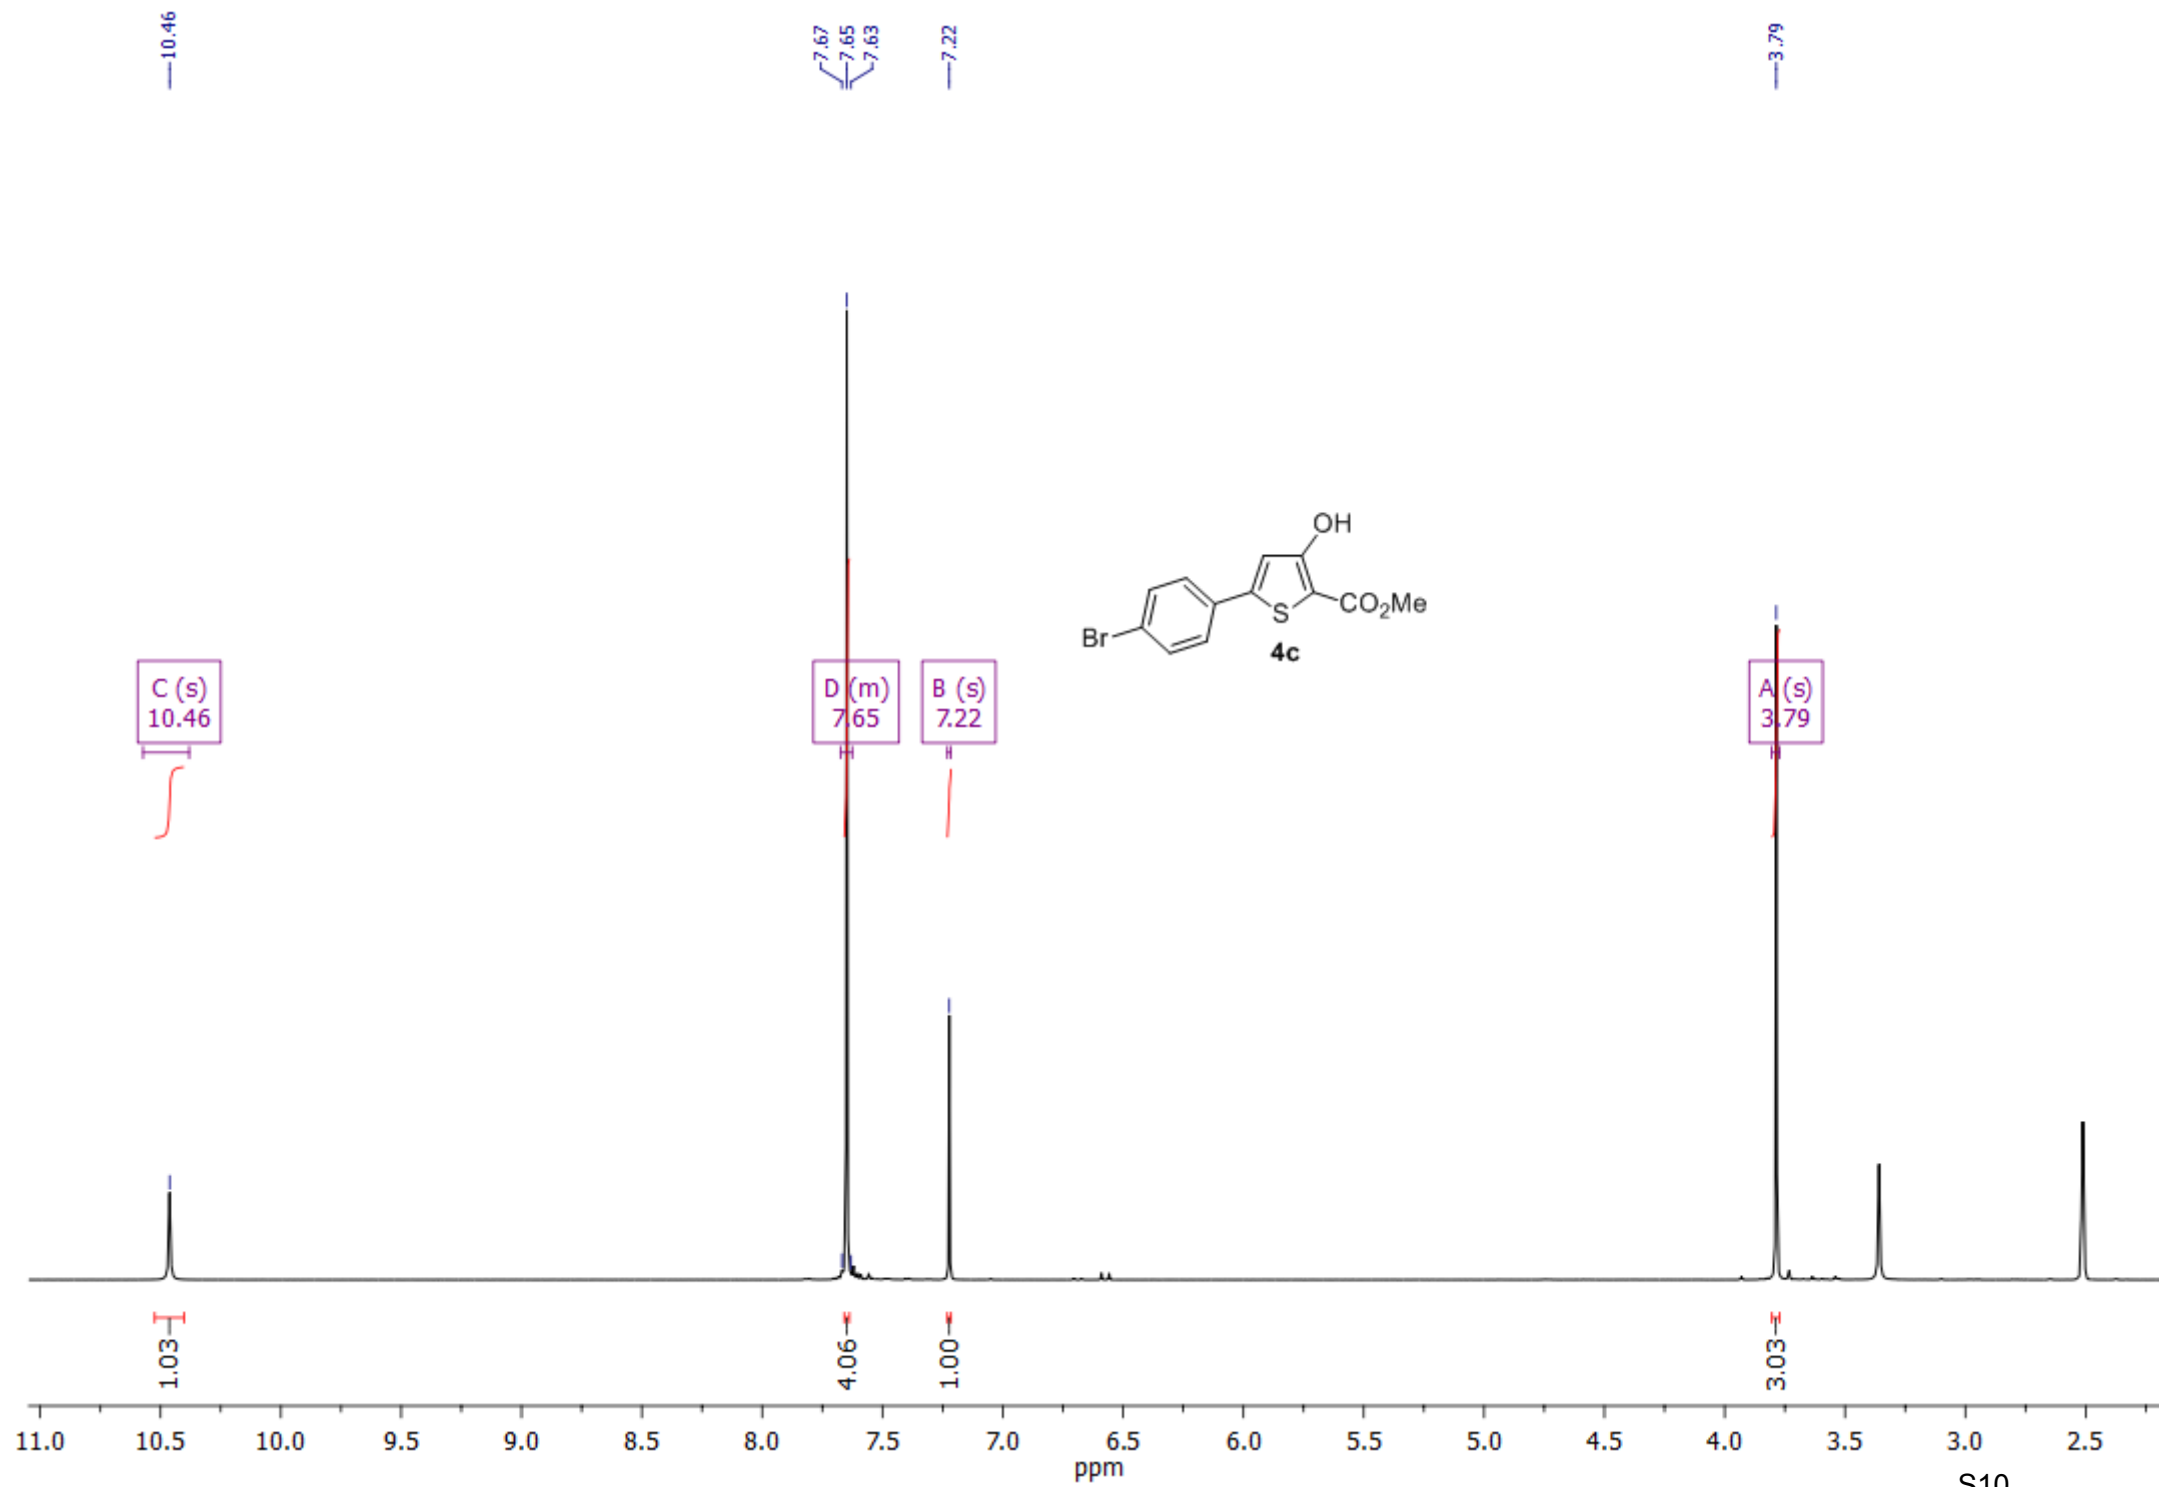

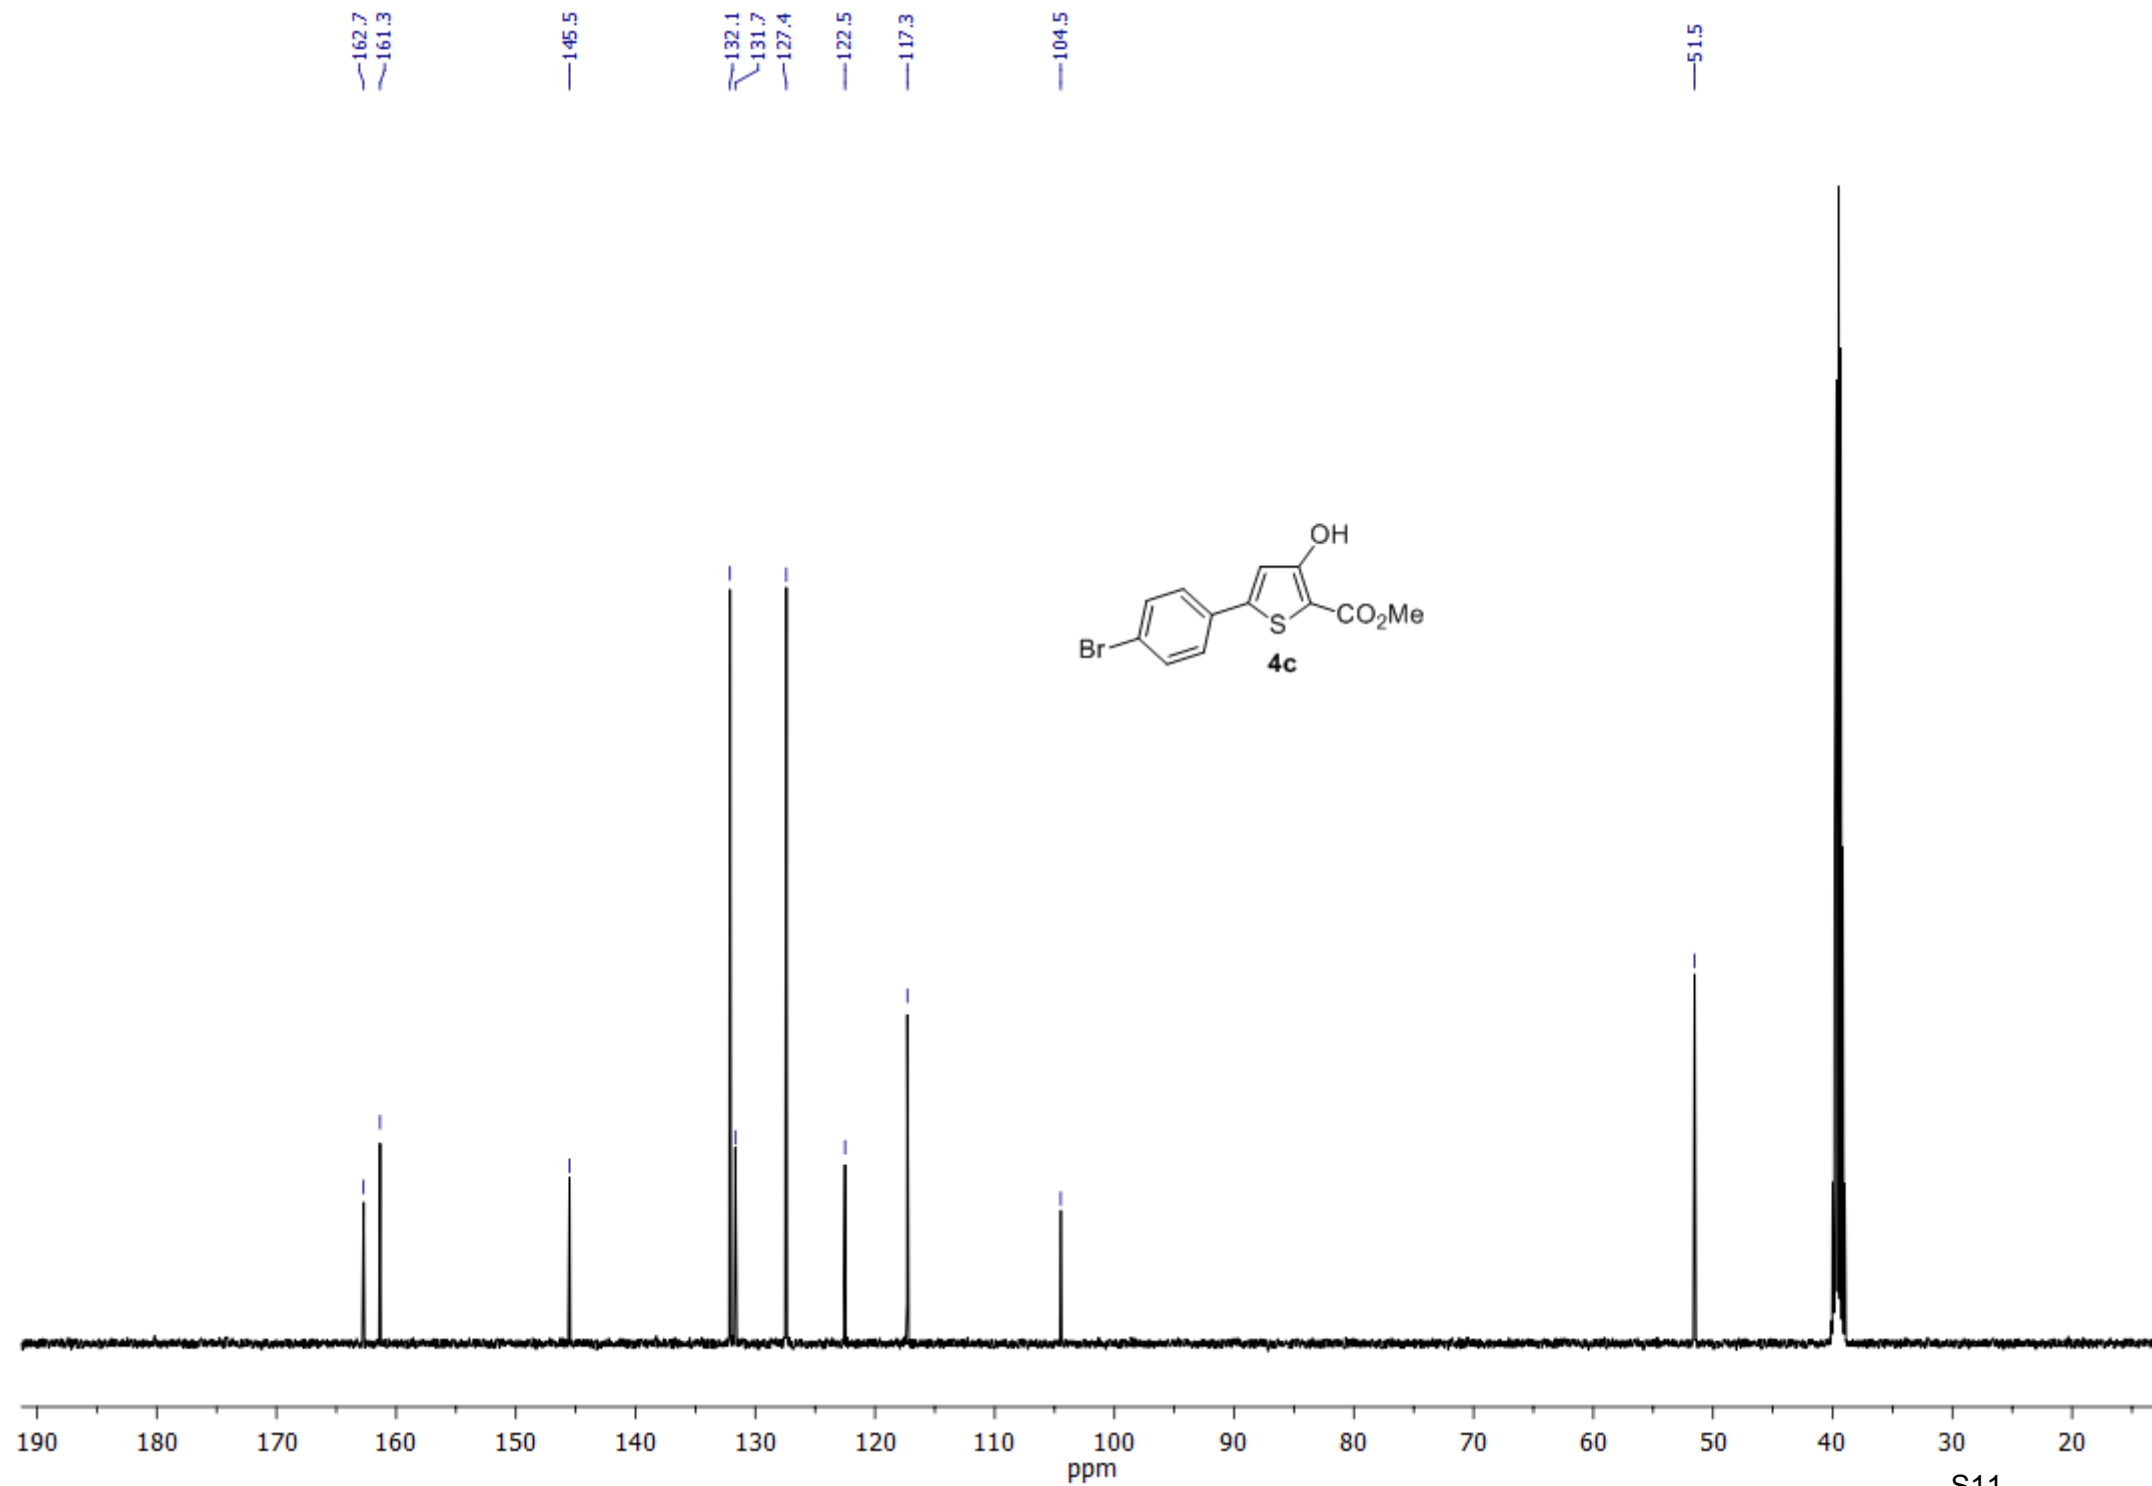

<sup>1</sup>H NMR (solvent: DMSO-*d*<sub>6</sub>)

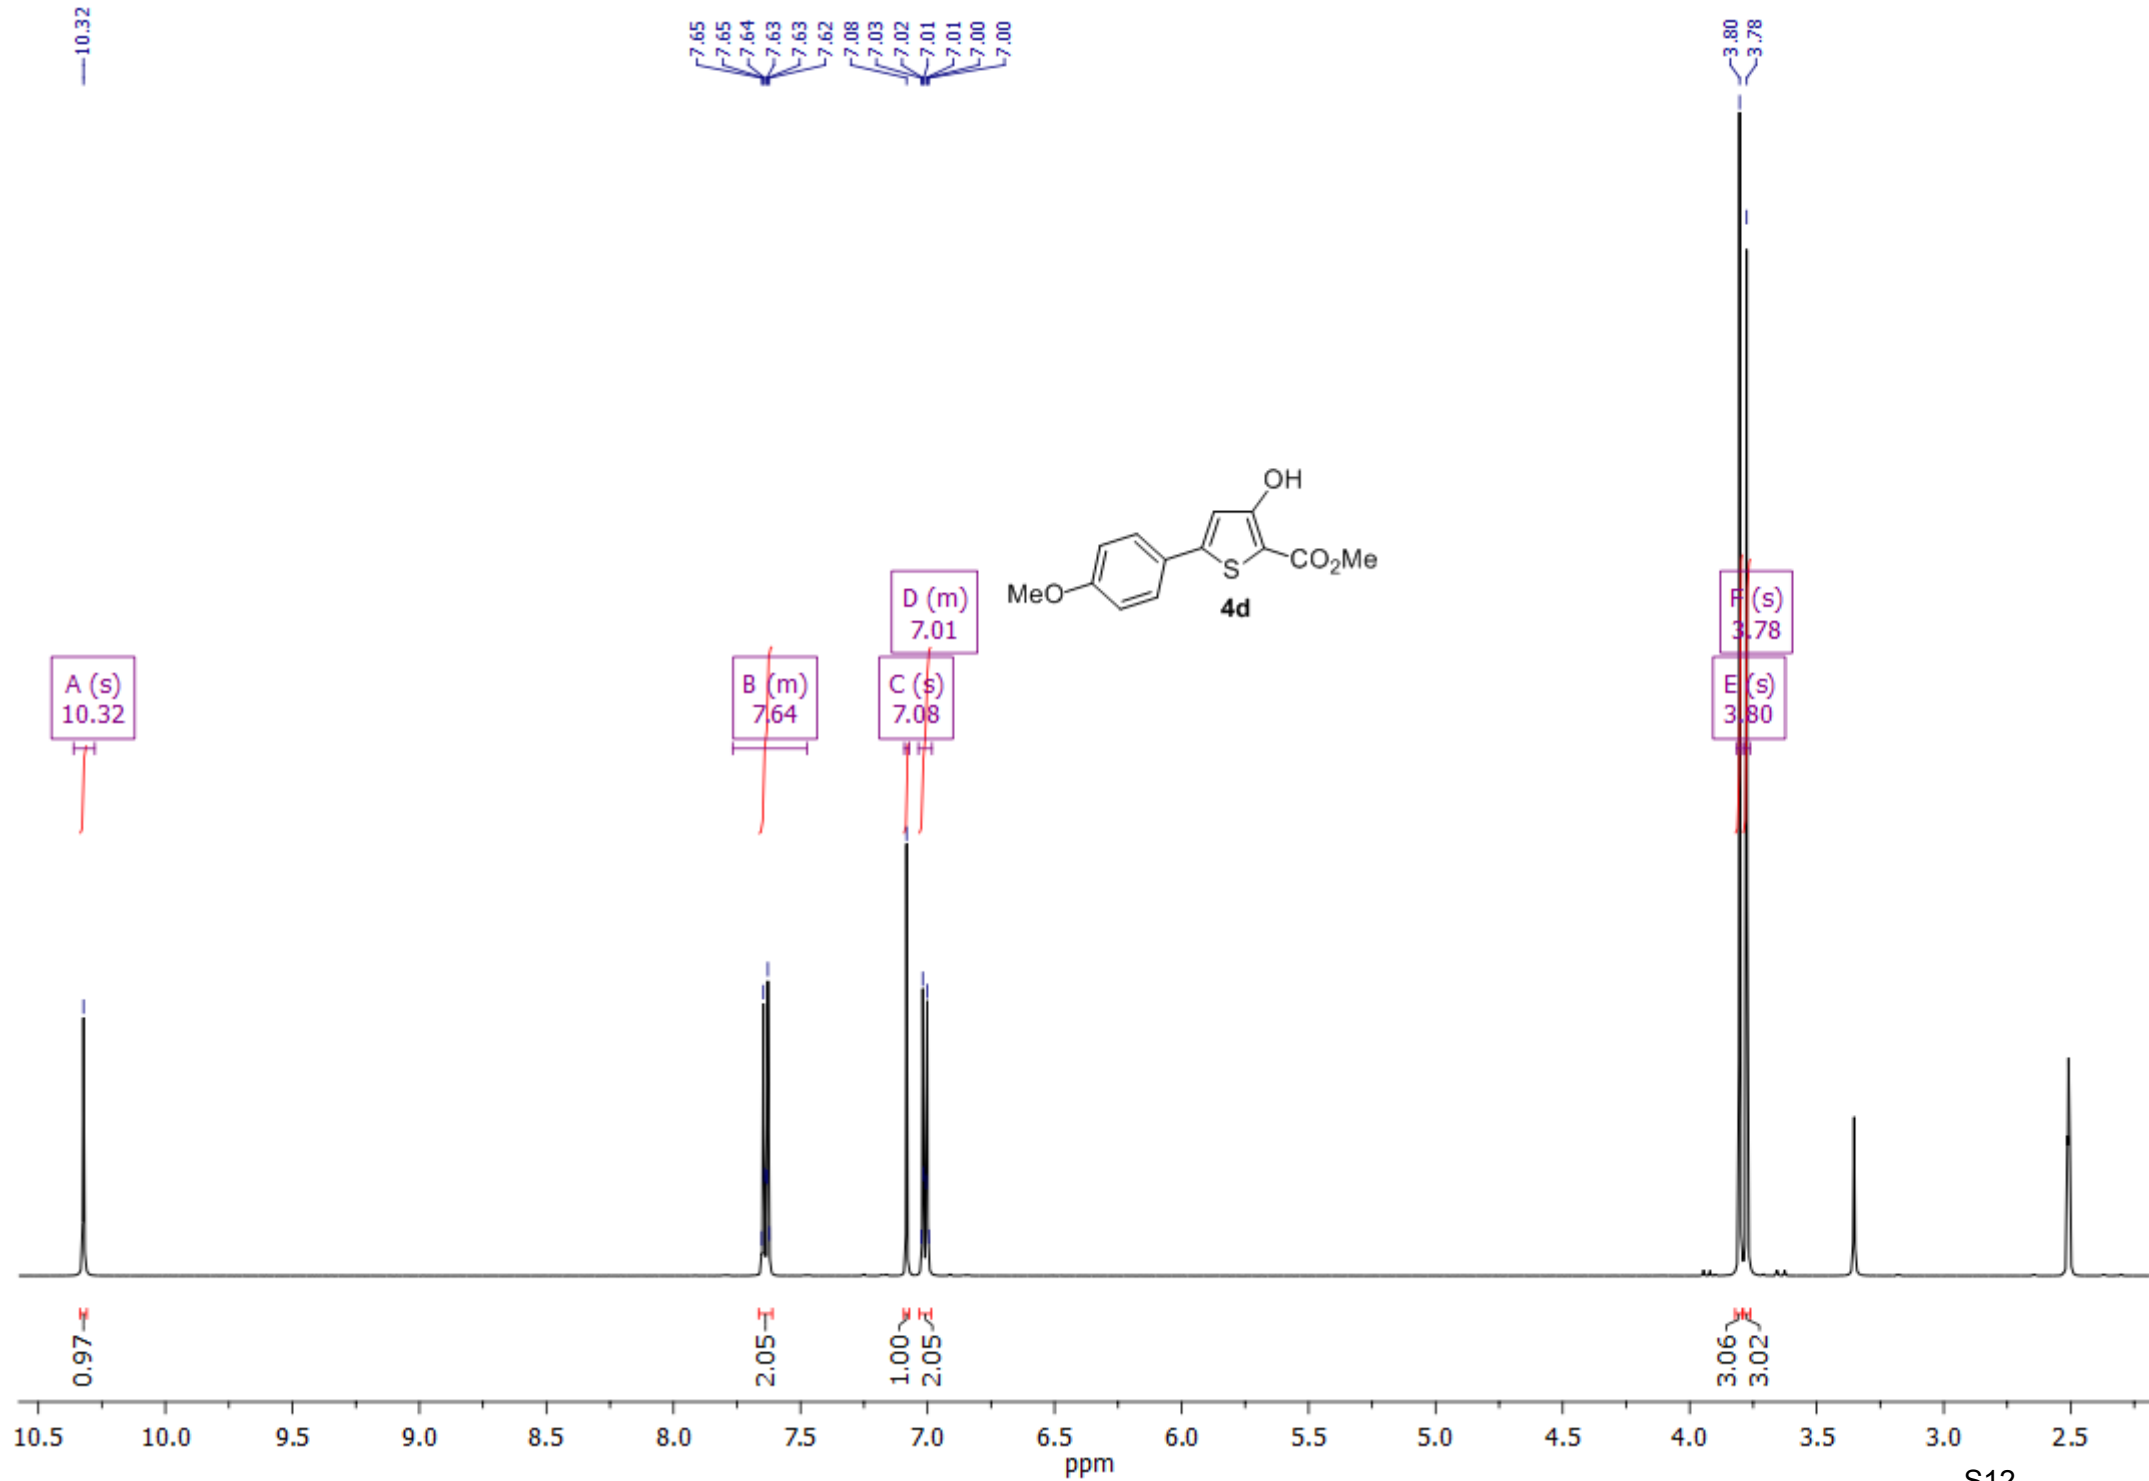

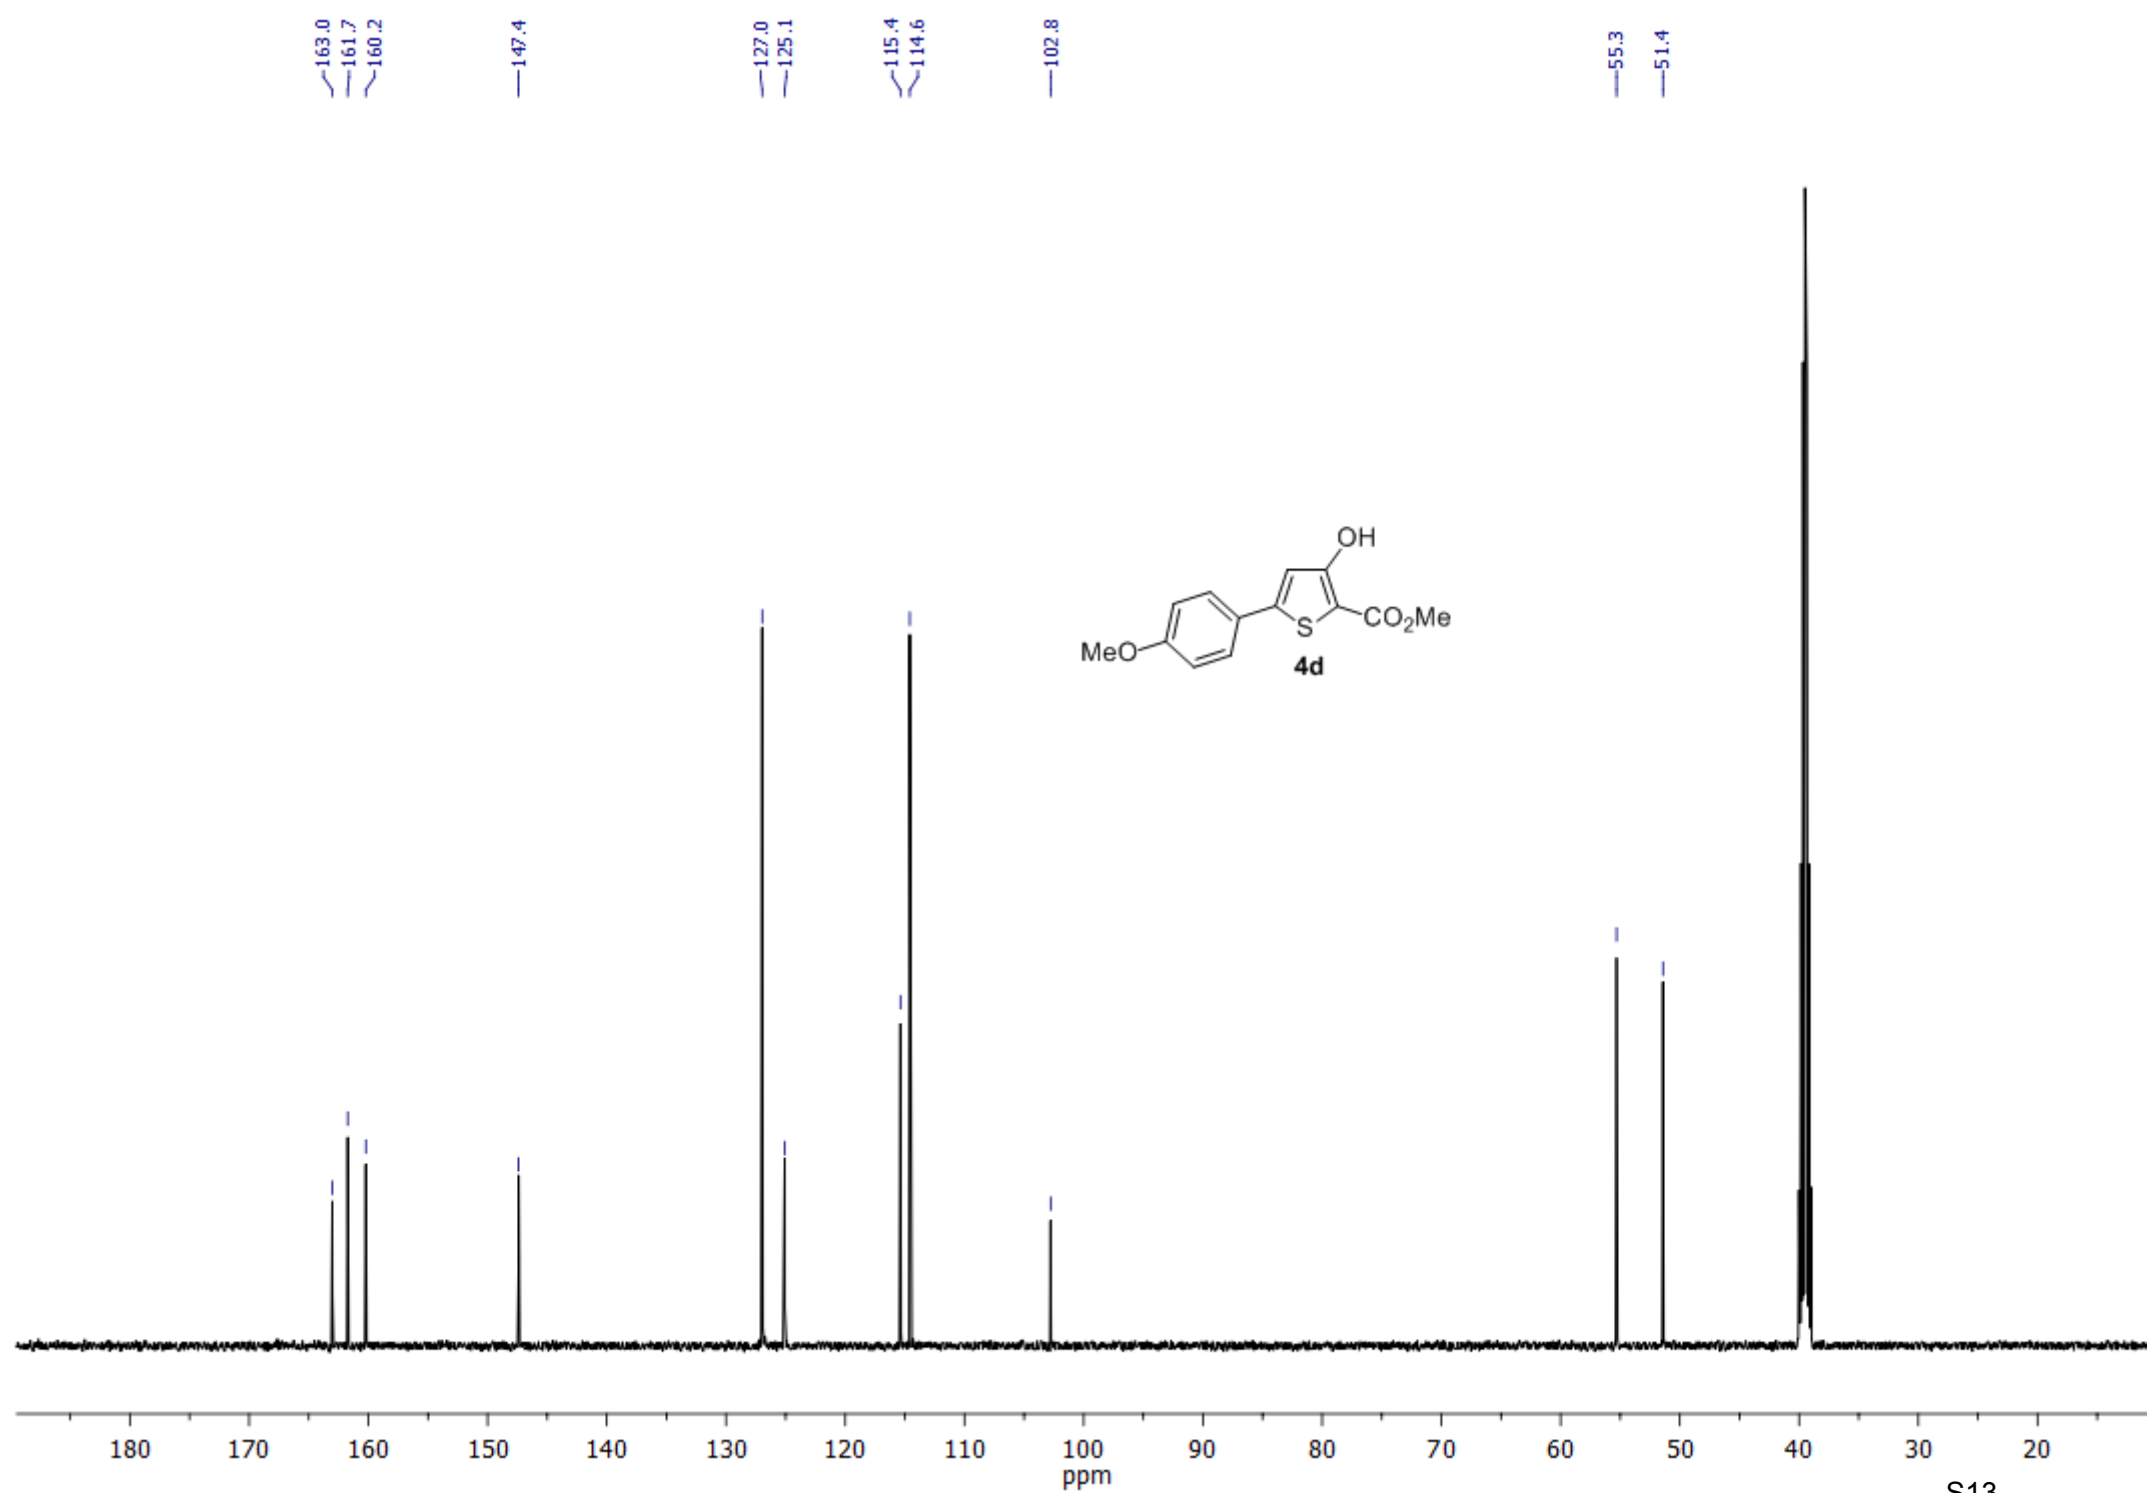

<sup>1</sup>H NMR (solvent: DMSO-*d*<sub>6</sub>)

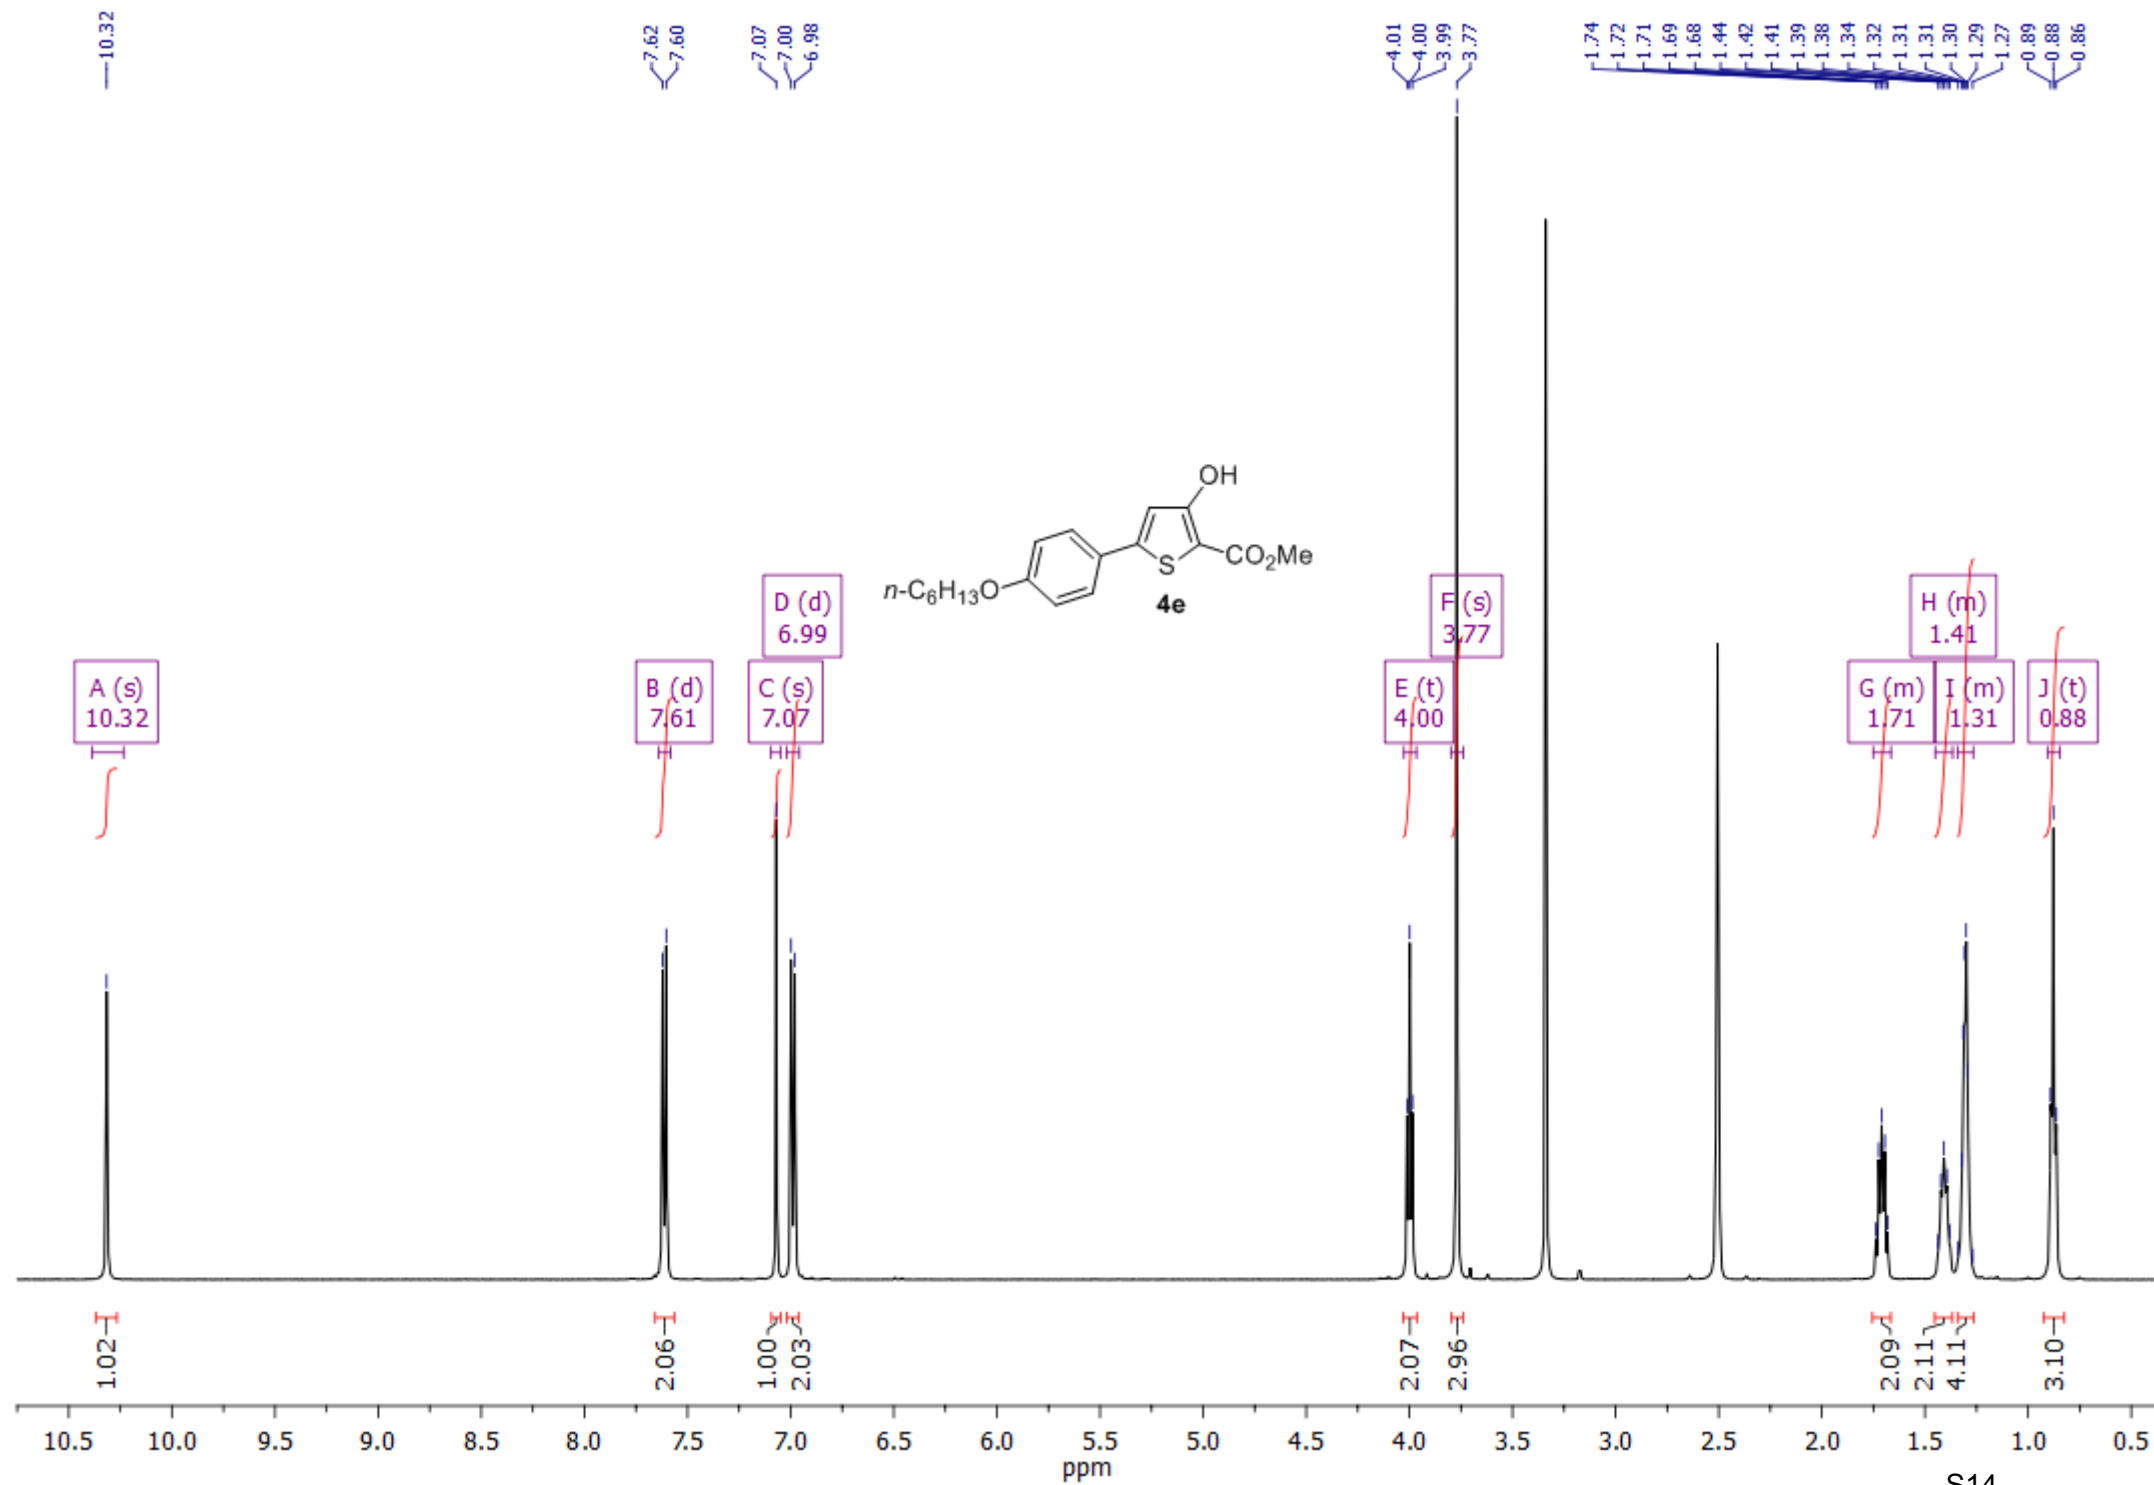

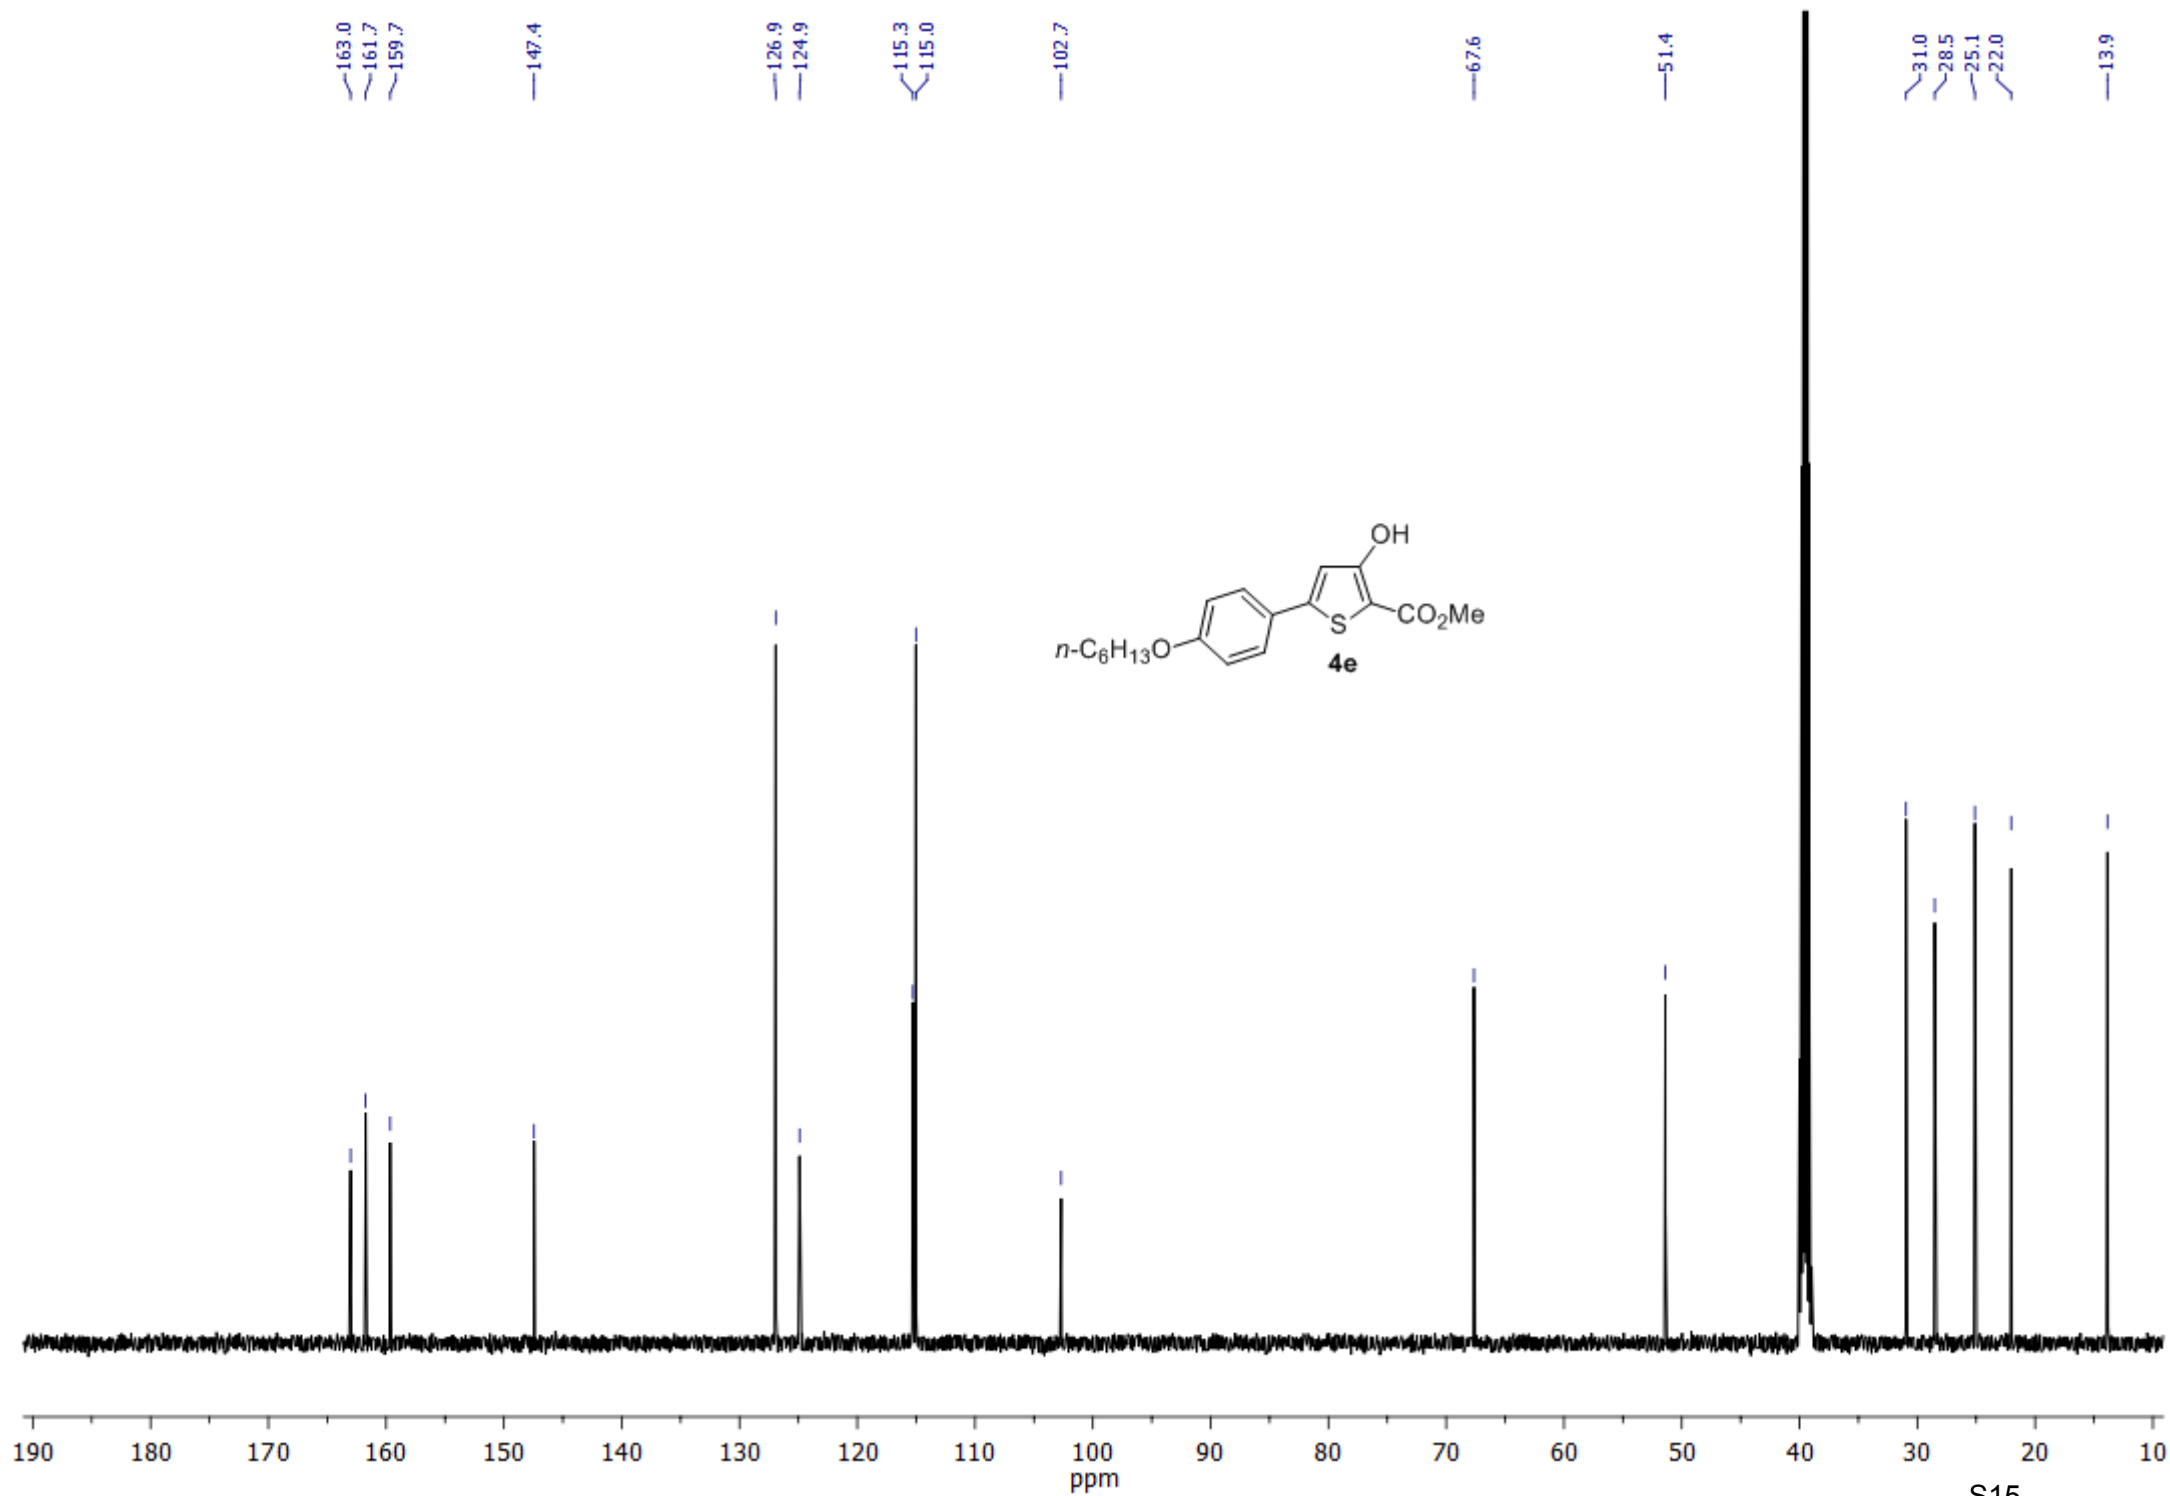

<sup>1</sup>H NMR (solvent: DMSO-*d*<sub>6</sub>)

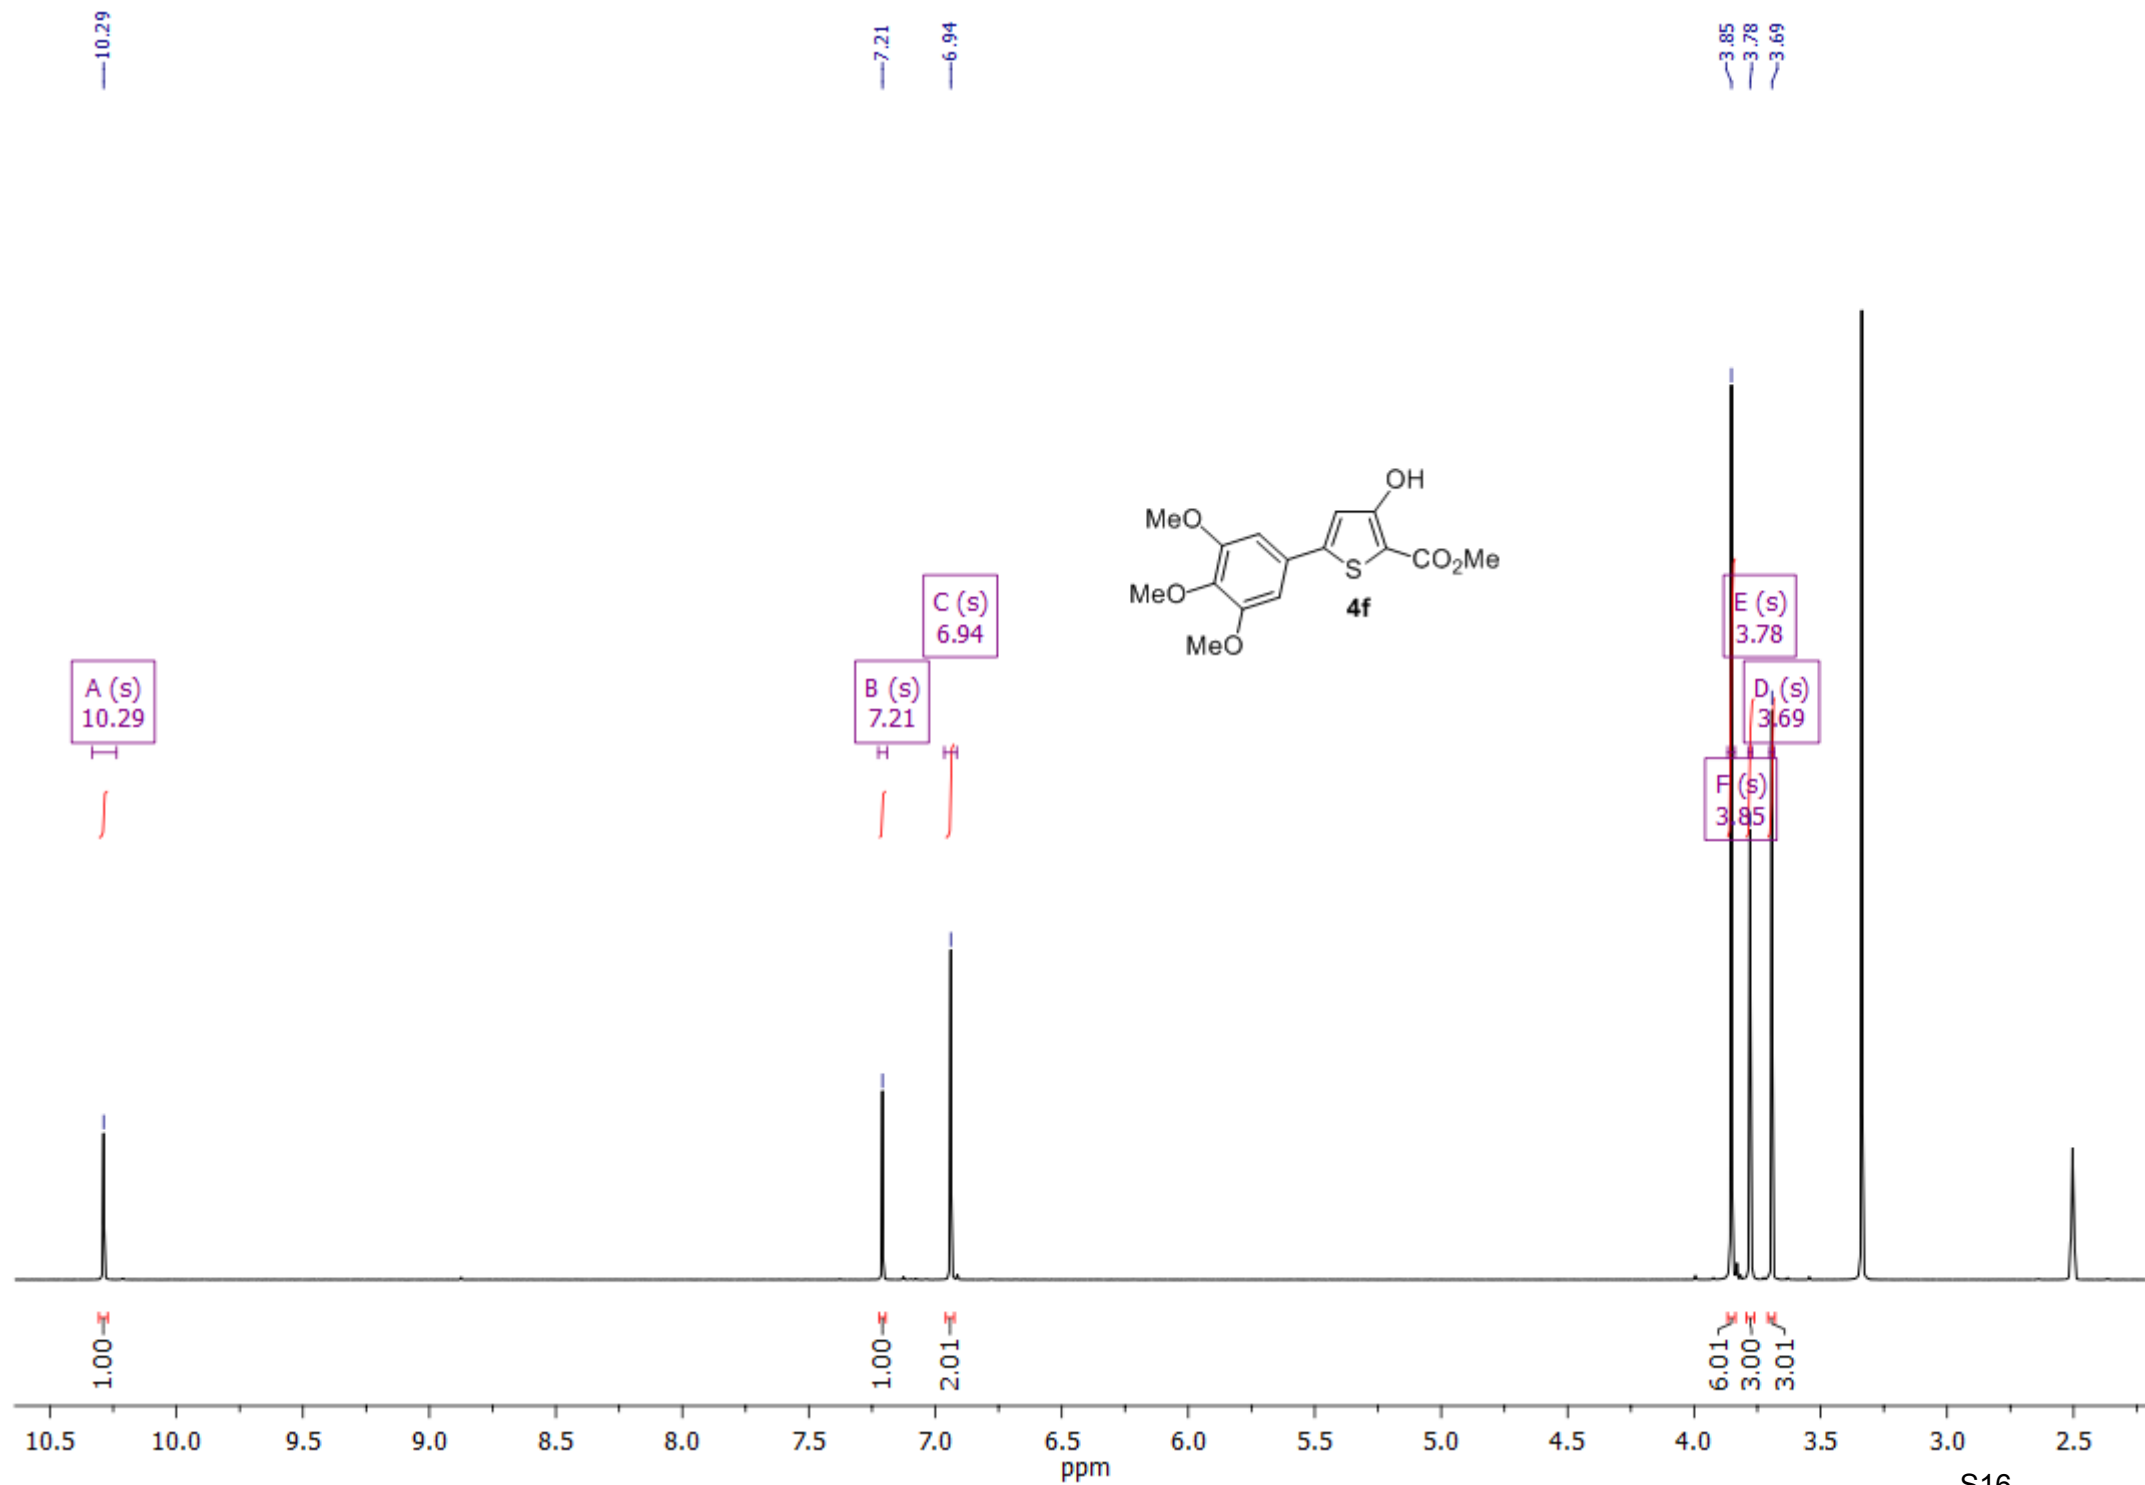



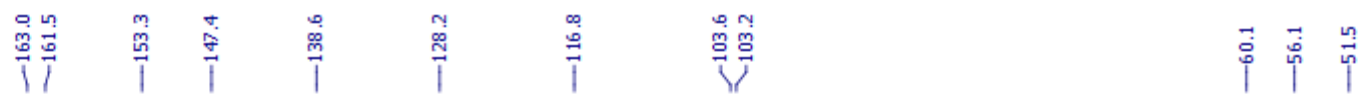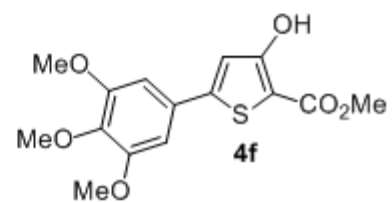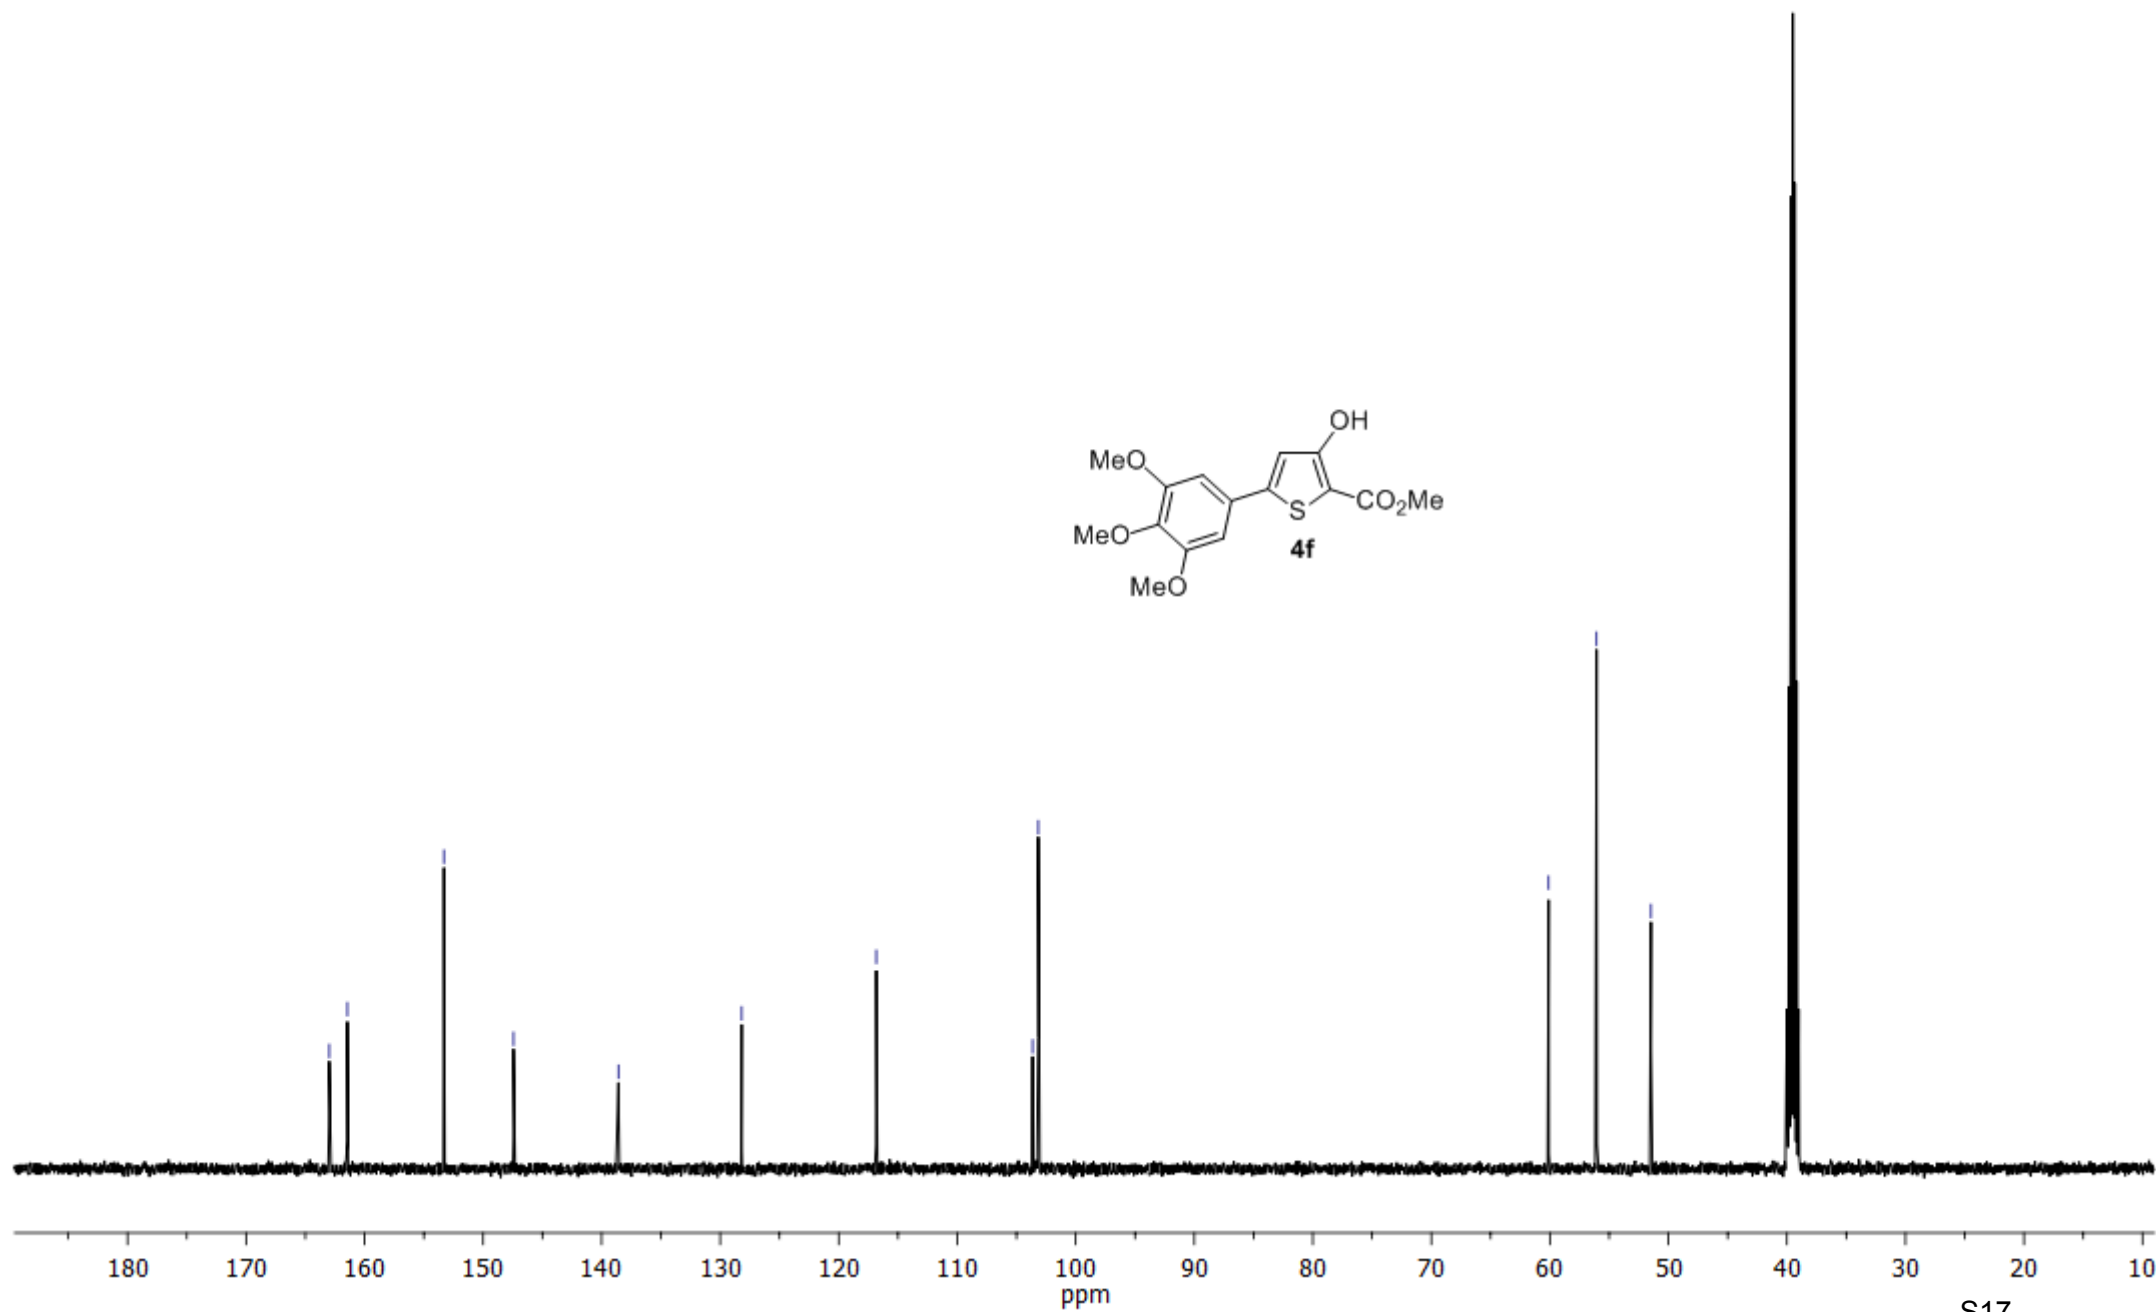

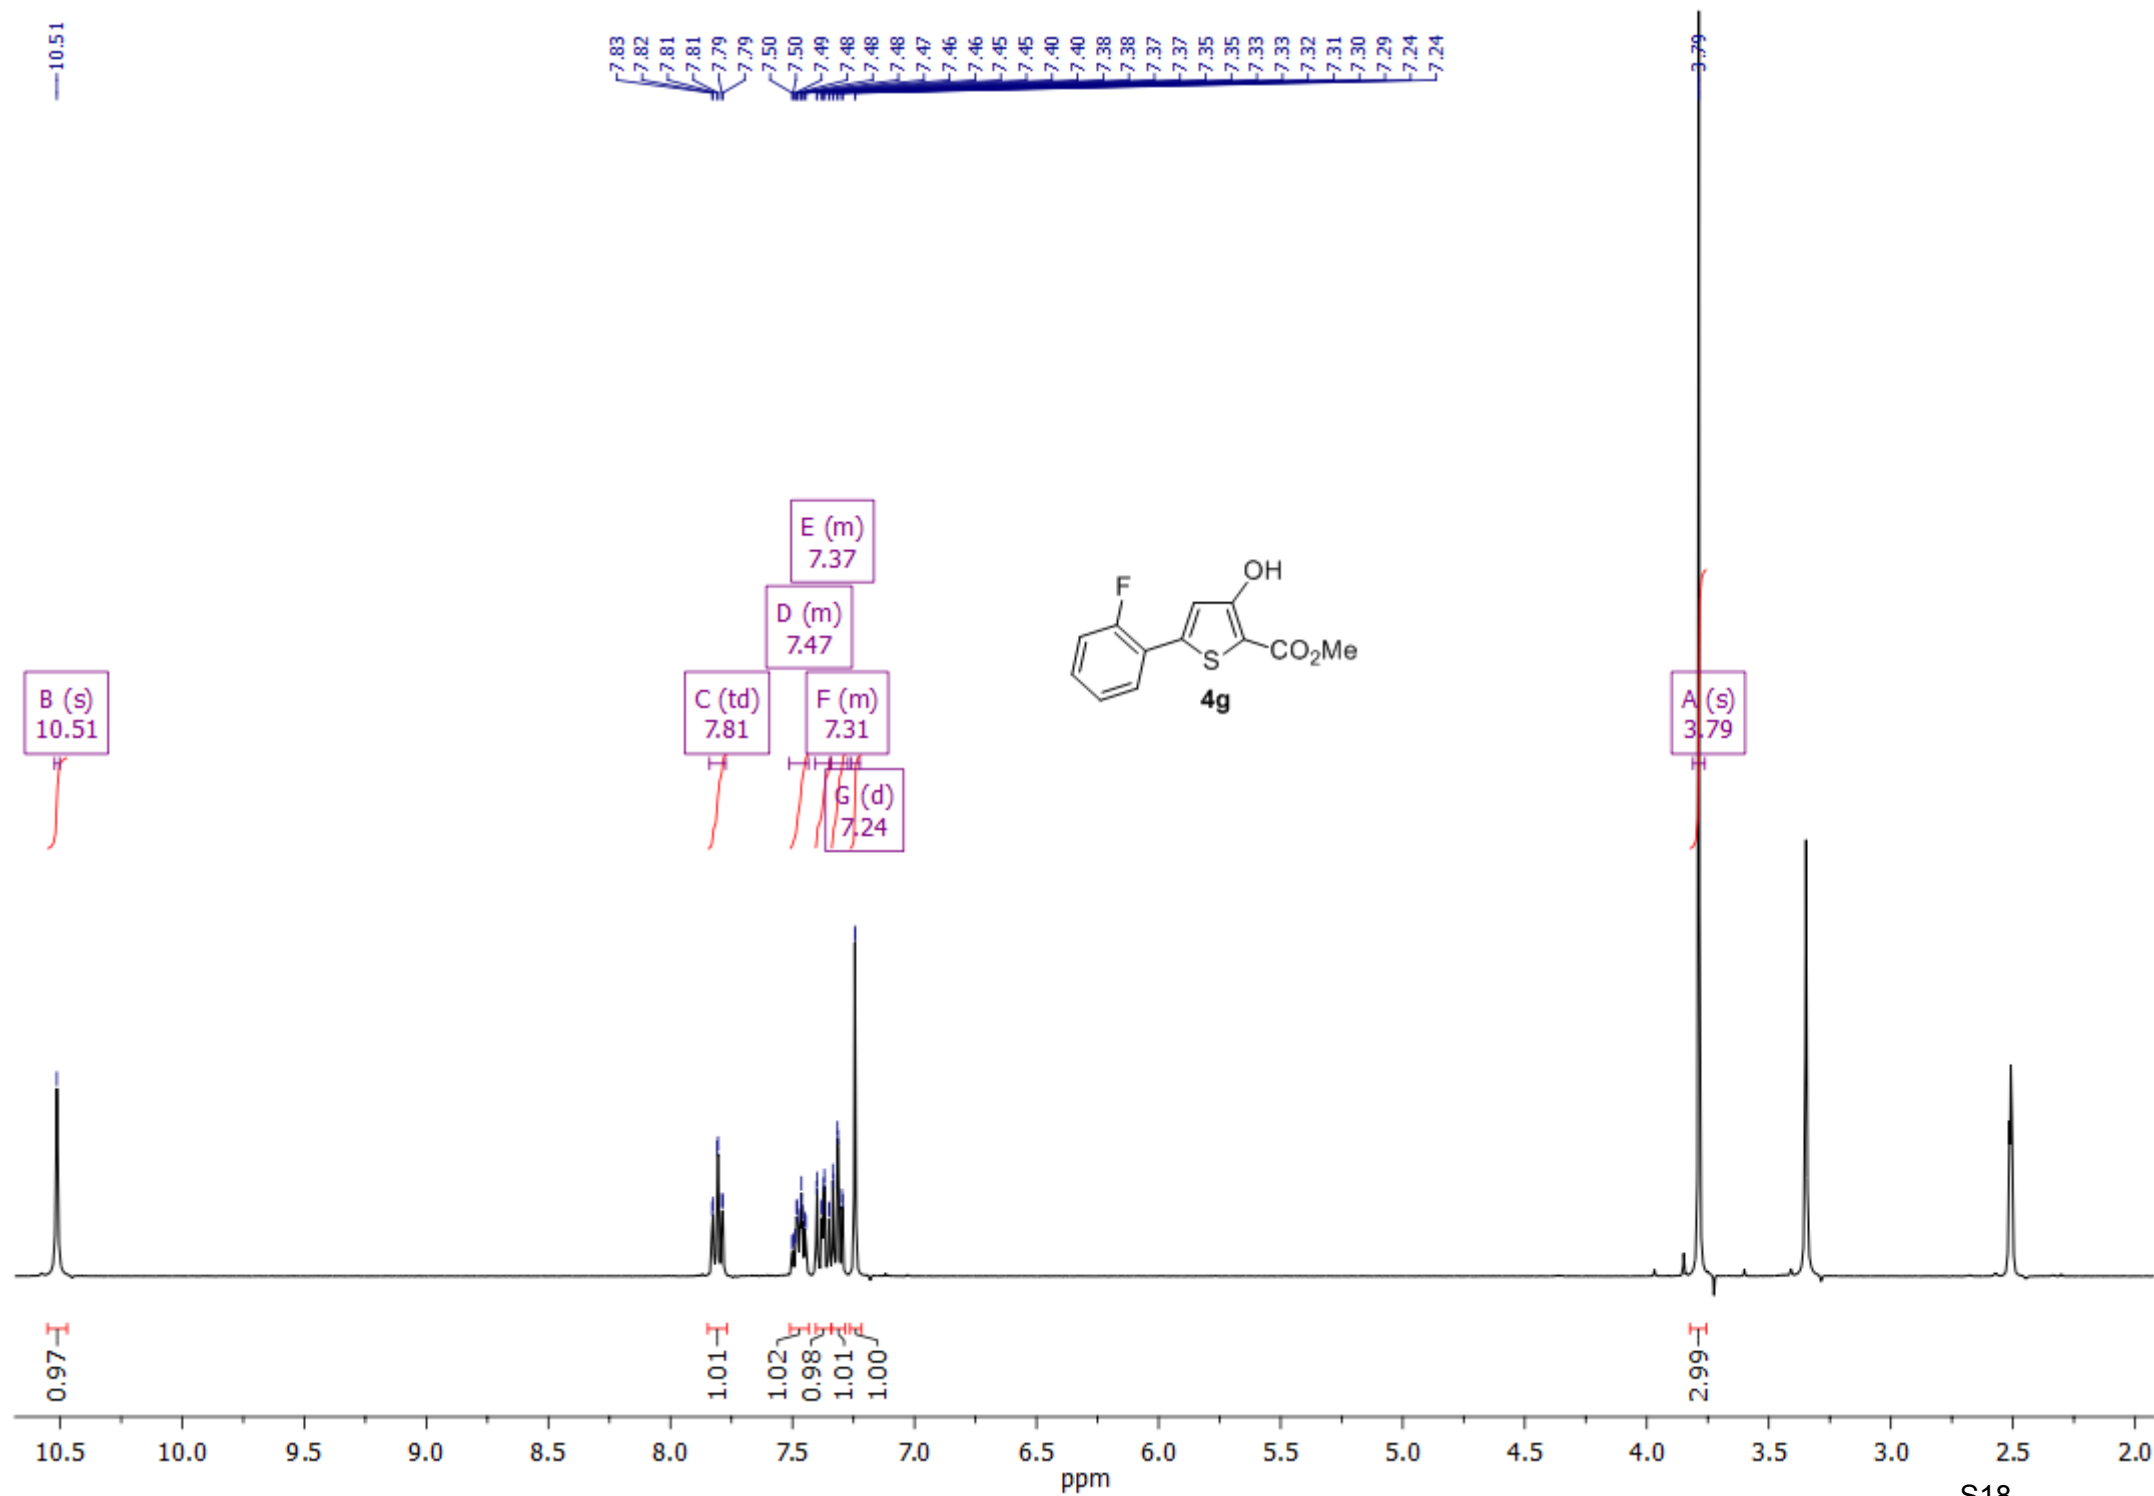

49.32  
49.31  
49.31  
49.30  
49.29  
49.28  
49.27

49.32  
49.31  
49.31  
49.30  
49.29  
49.28  
49.27

A (m)  
49.30

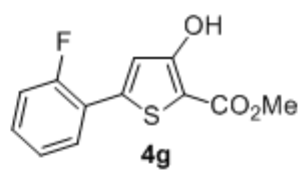

A (m)  
49.30

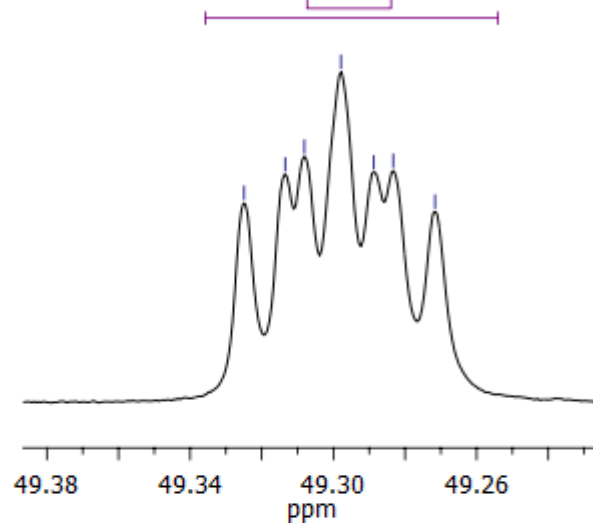

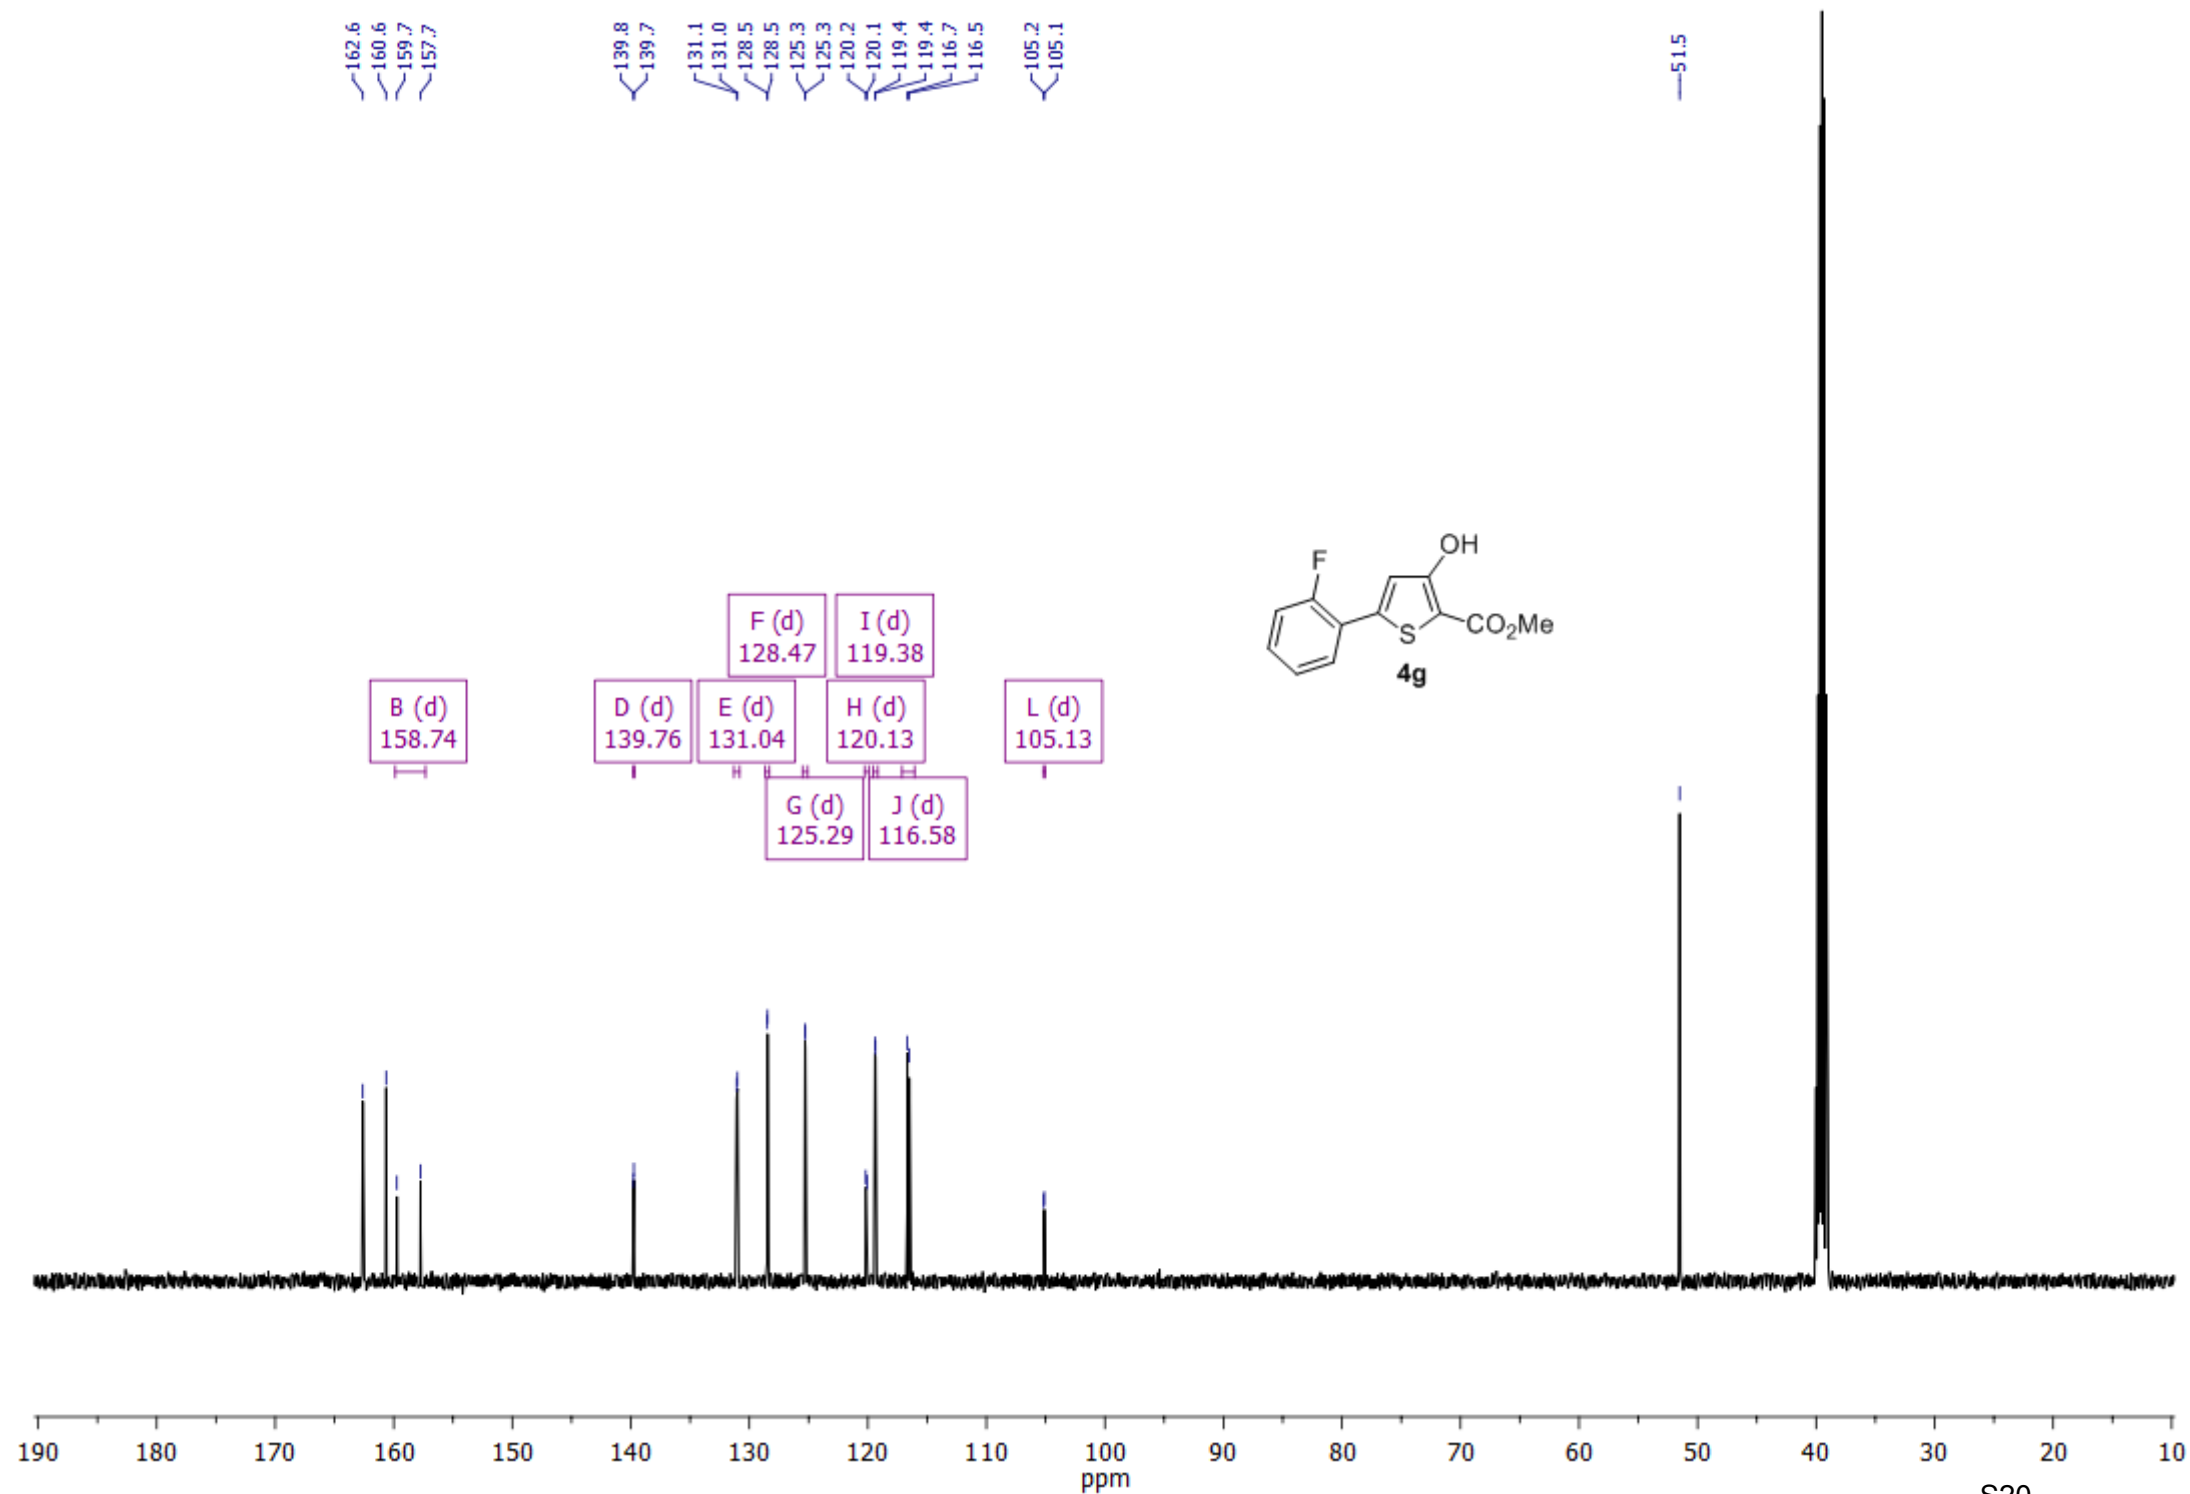

<sup>1</sup>H NMR (solvent: DMSO-*d*<sub>6</sub>)

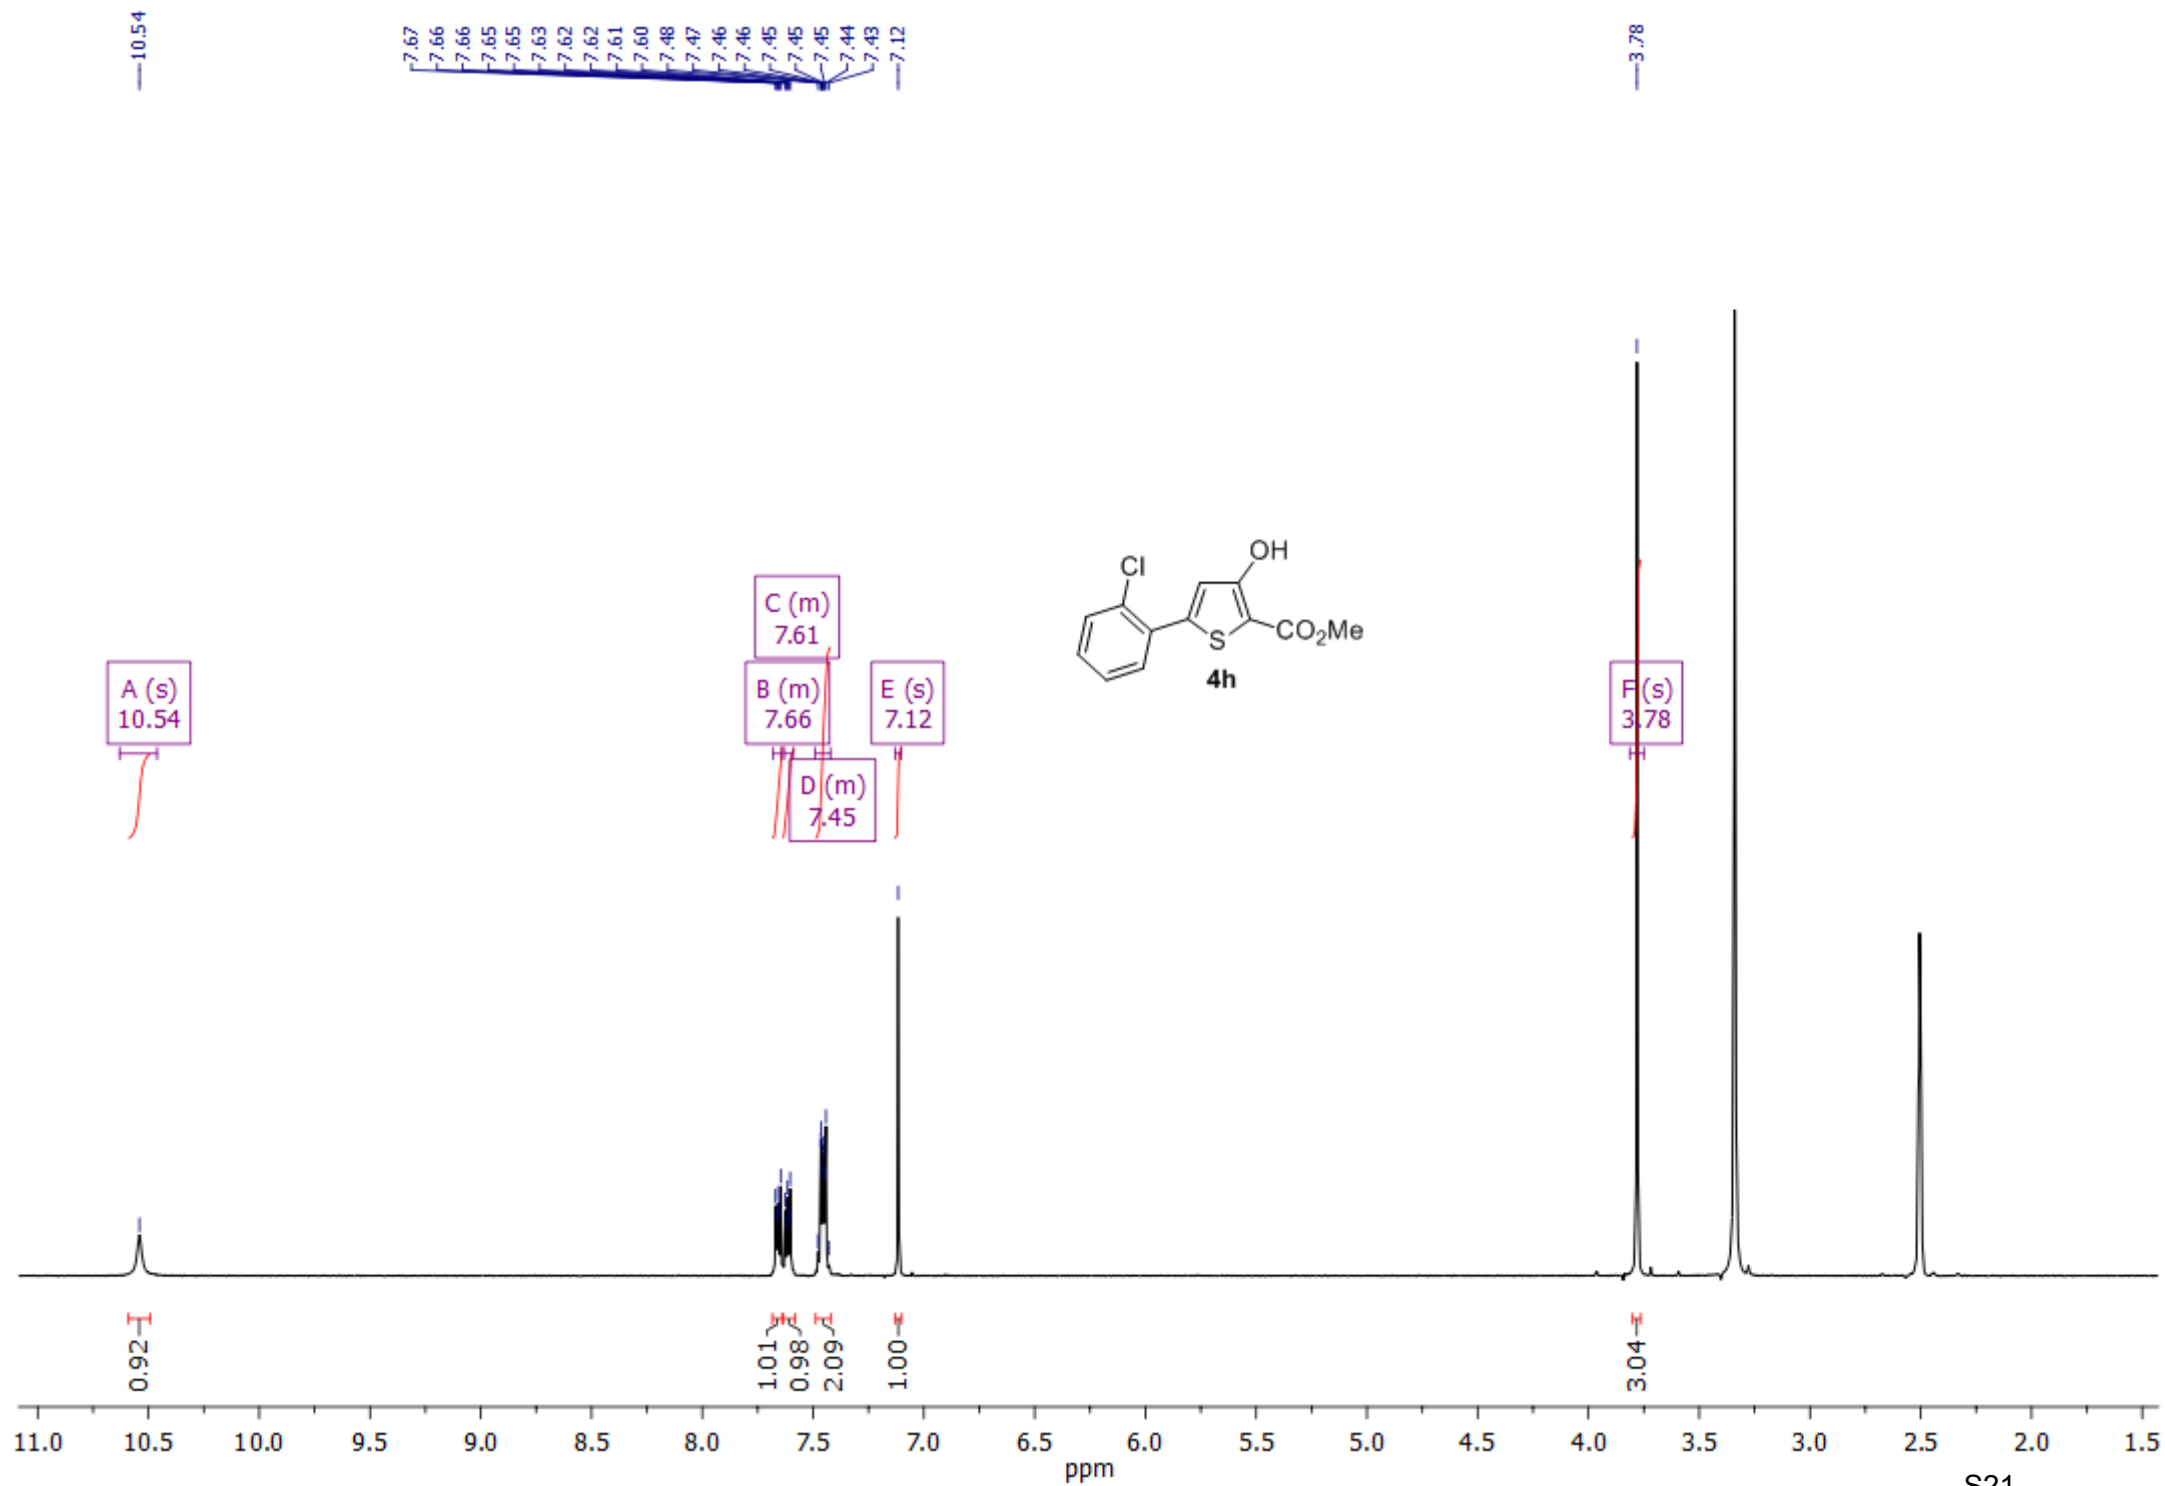

<sup>13</sup>C NMR (solvent: DMSO-*d*<sub>6</sub>)

—162.5  
—160.2  
  
—143.0  
  
—131.2  
—131.0  
—131.0  
—130.7  
—130.6  
—127.9  
—121.2  
  
—105.8  
  
—51.5

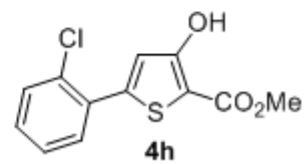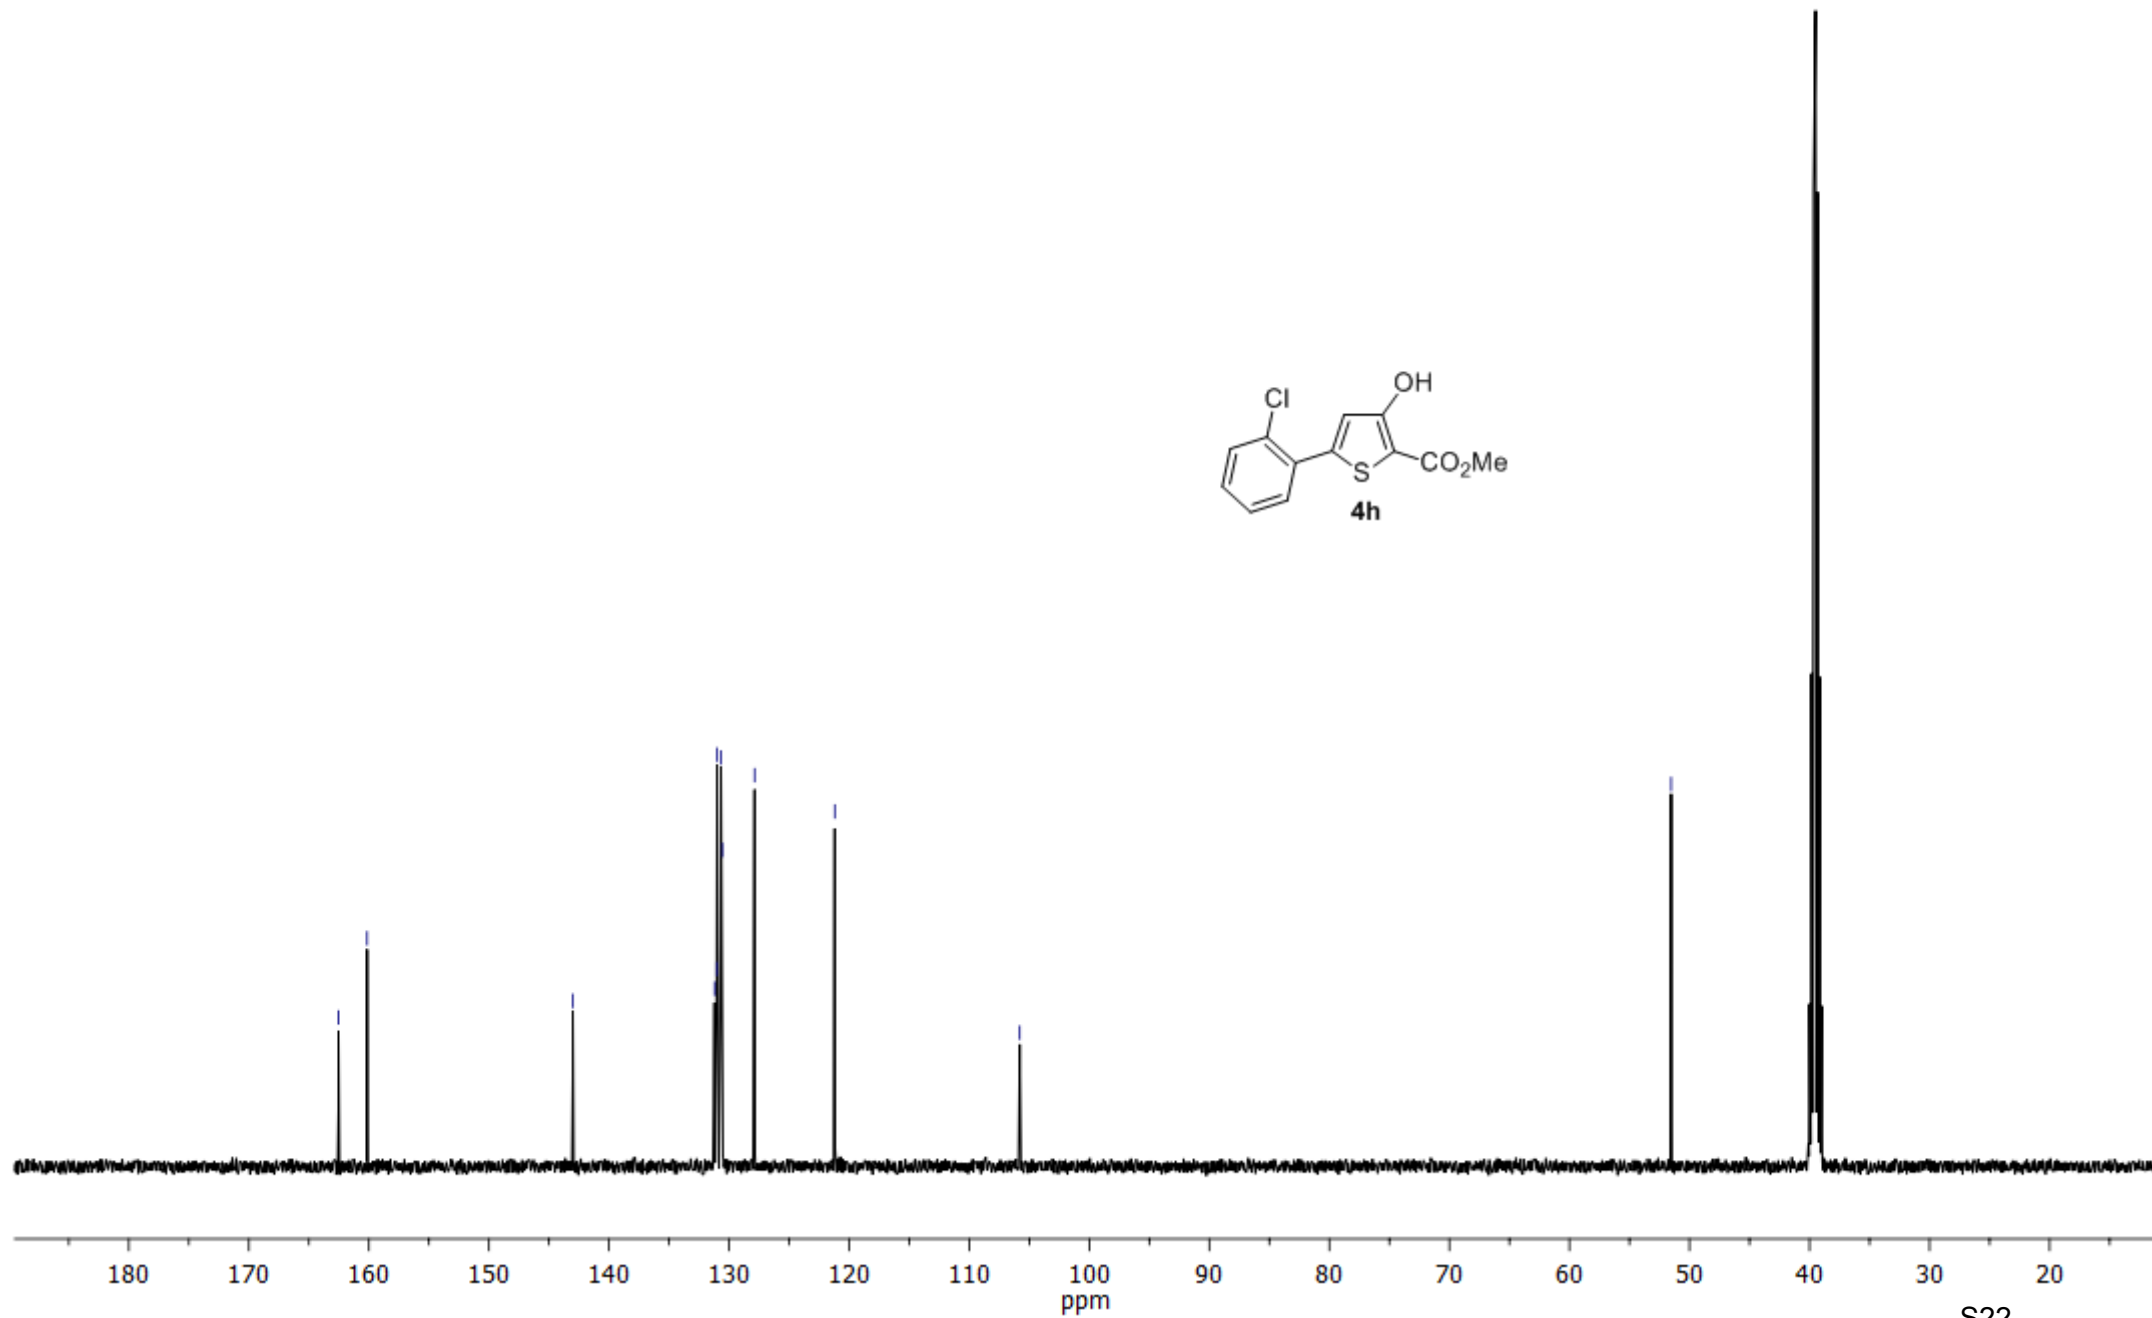

<sup>1</sup>H NMR (solvent: DMSO-*d*<sub>6</sub>)

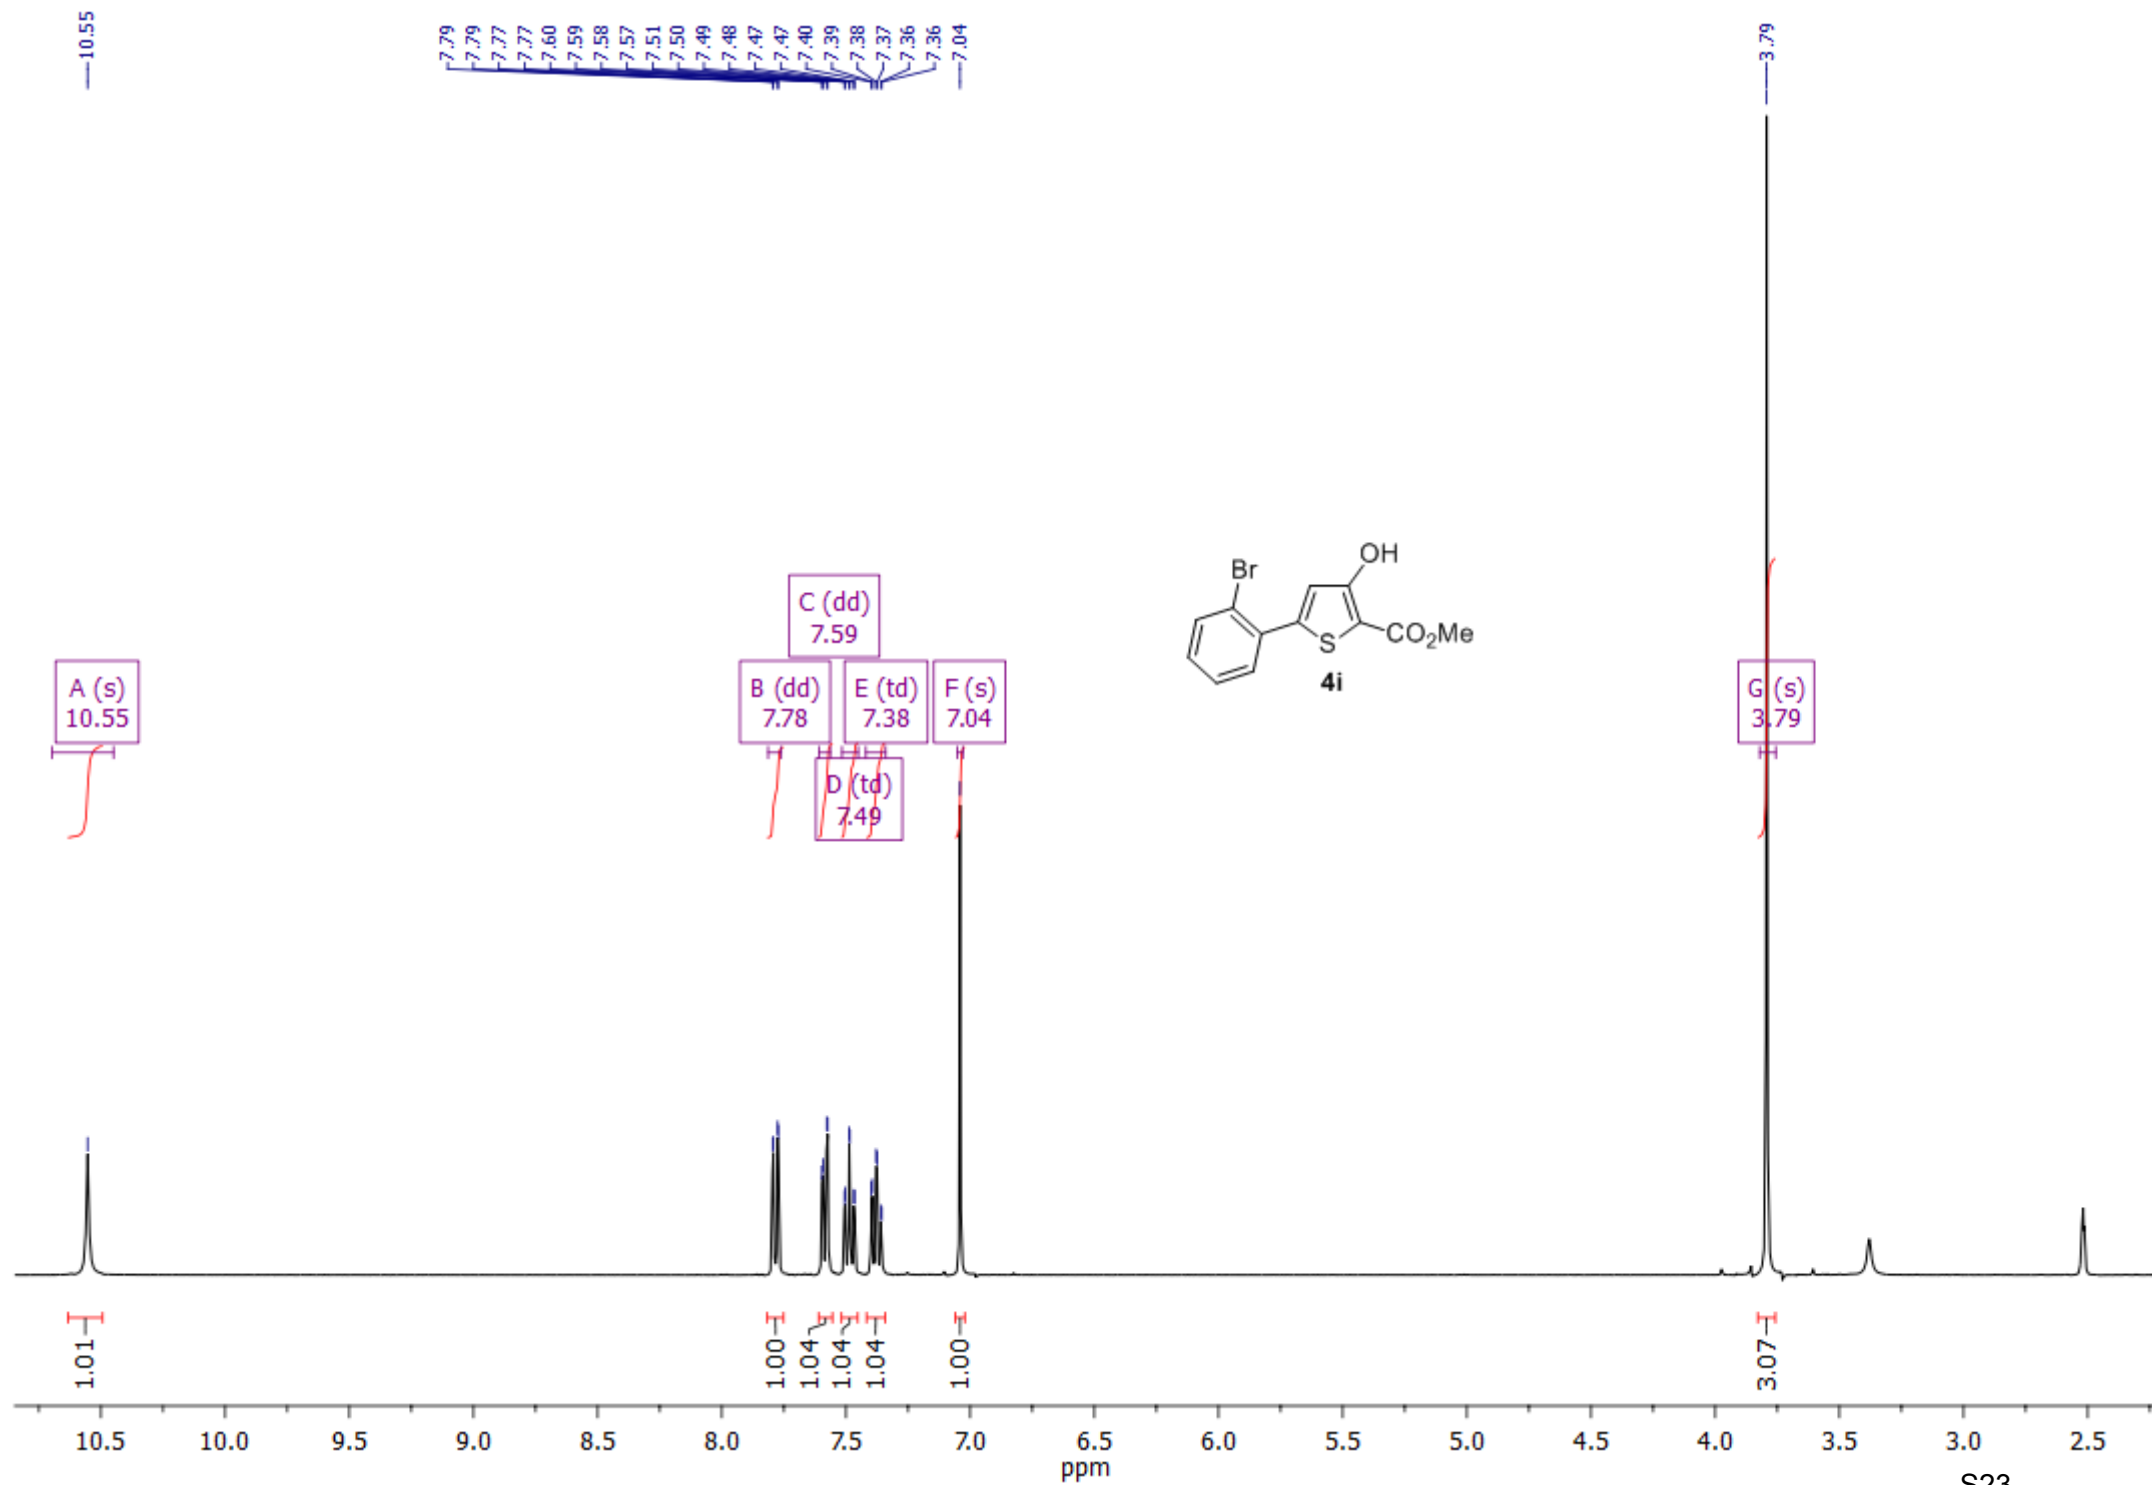

<sup>13</sup>C NMR (solvent: DMSO-*d*<sub>6</sub>)

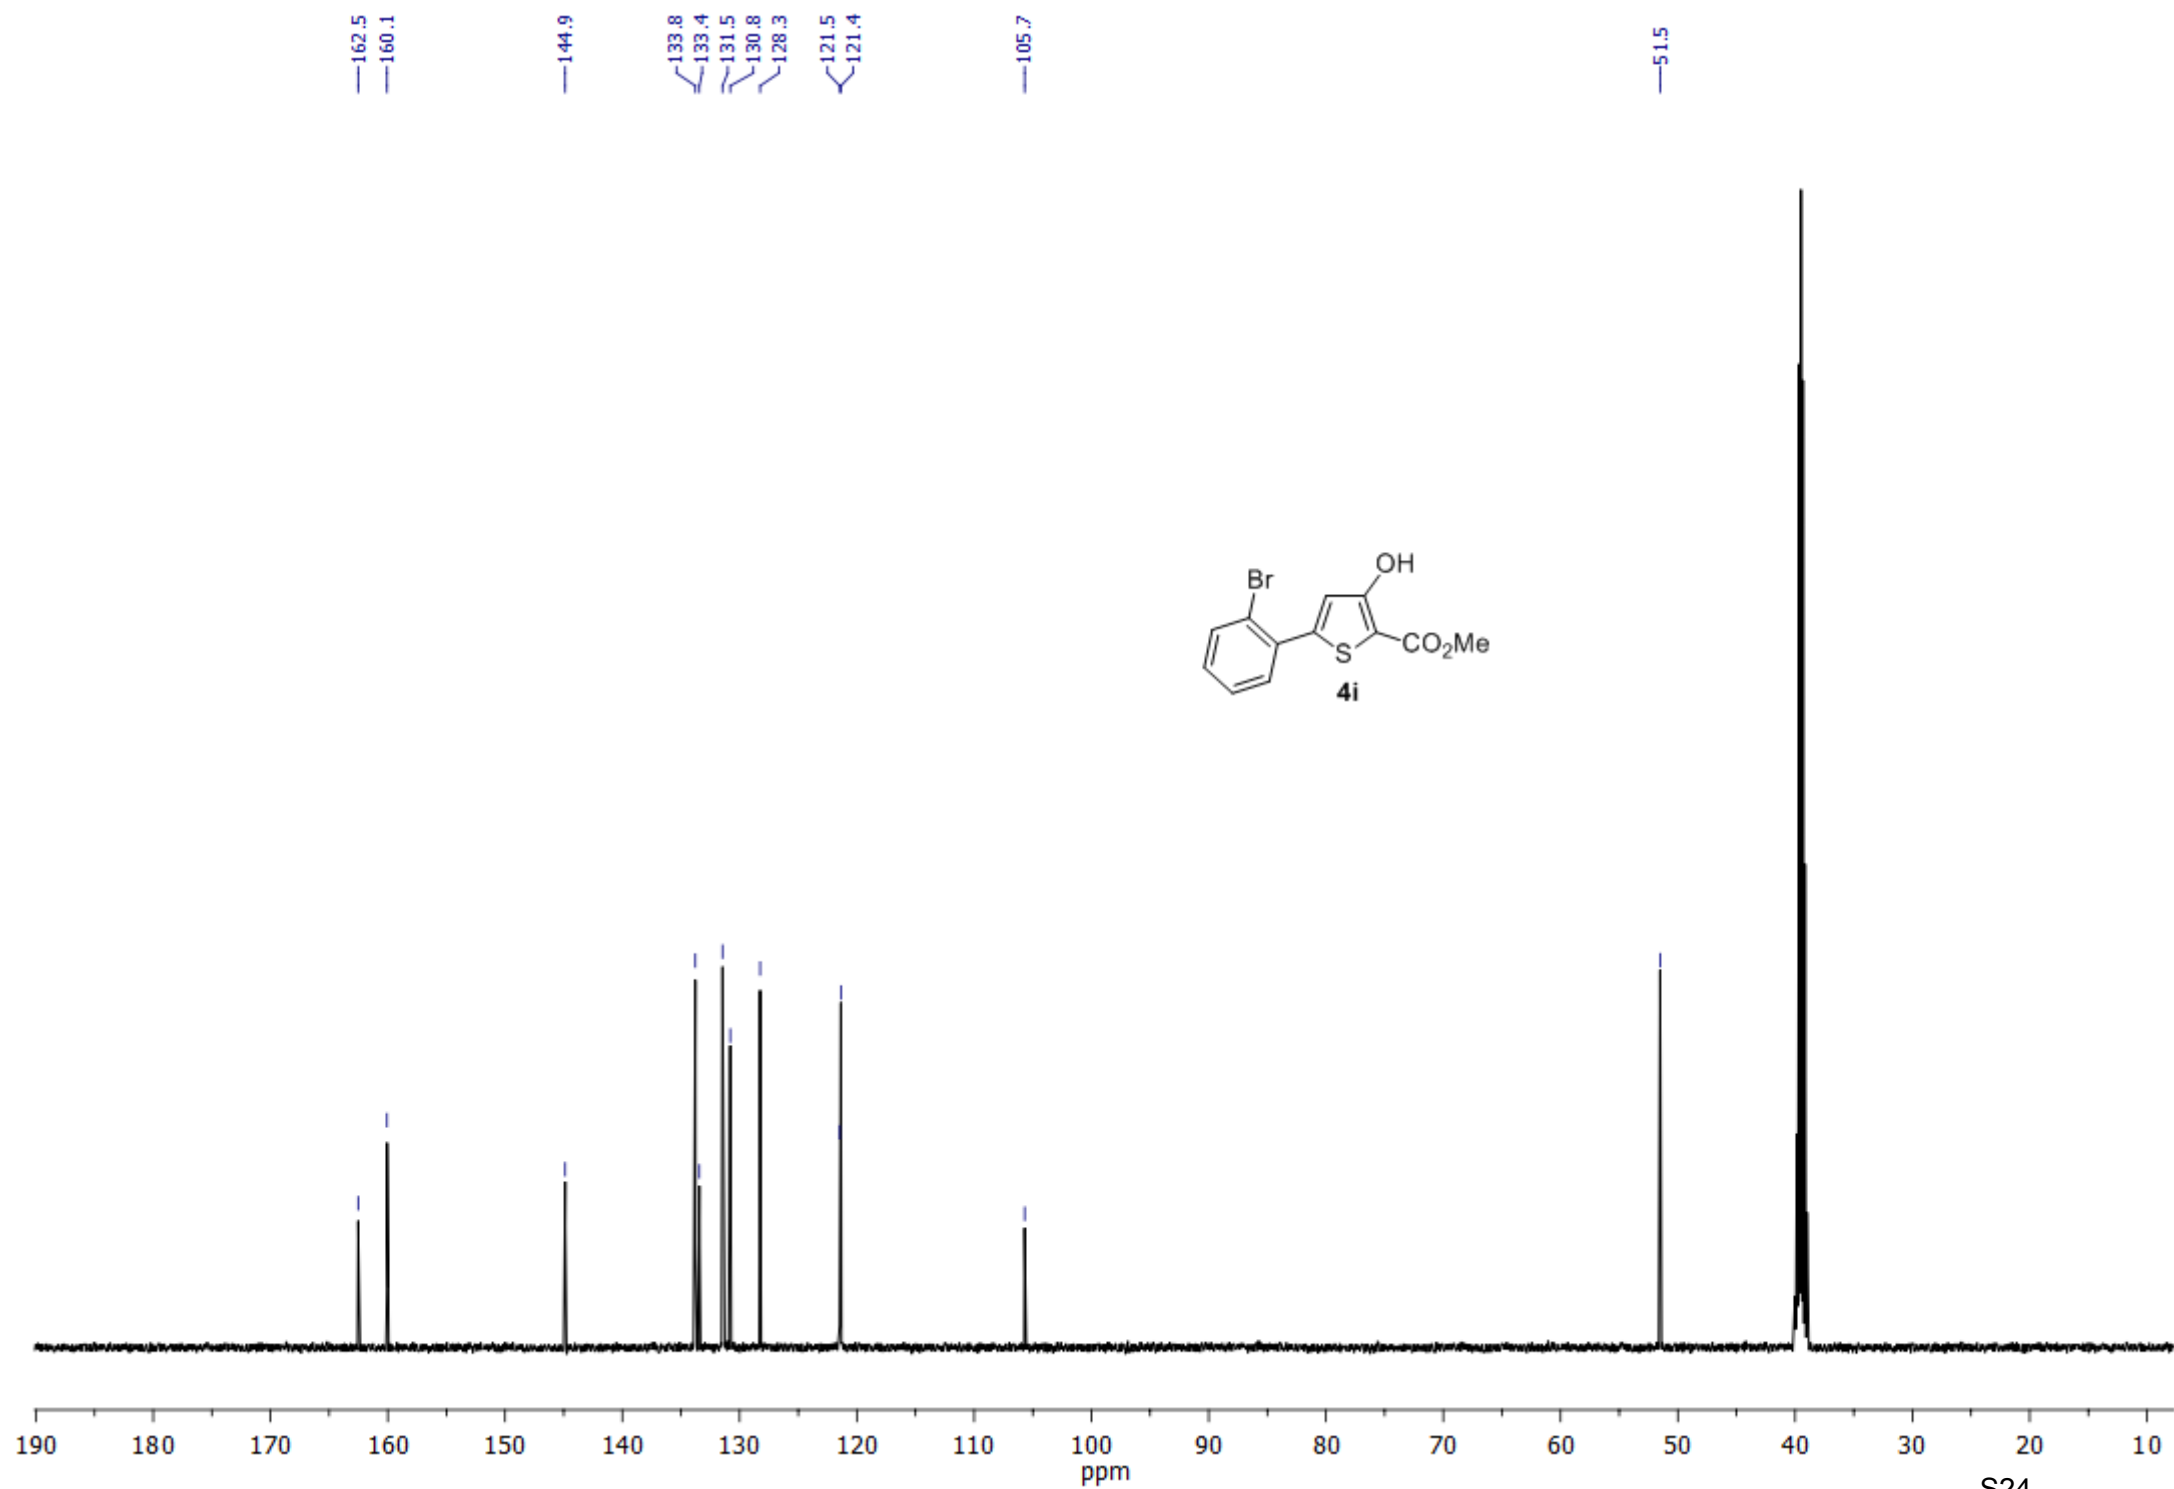



<sup>1</sup>H NMR (solvent: DMSO-*d*<sub>6</sub>)

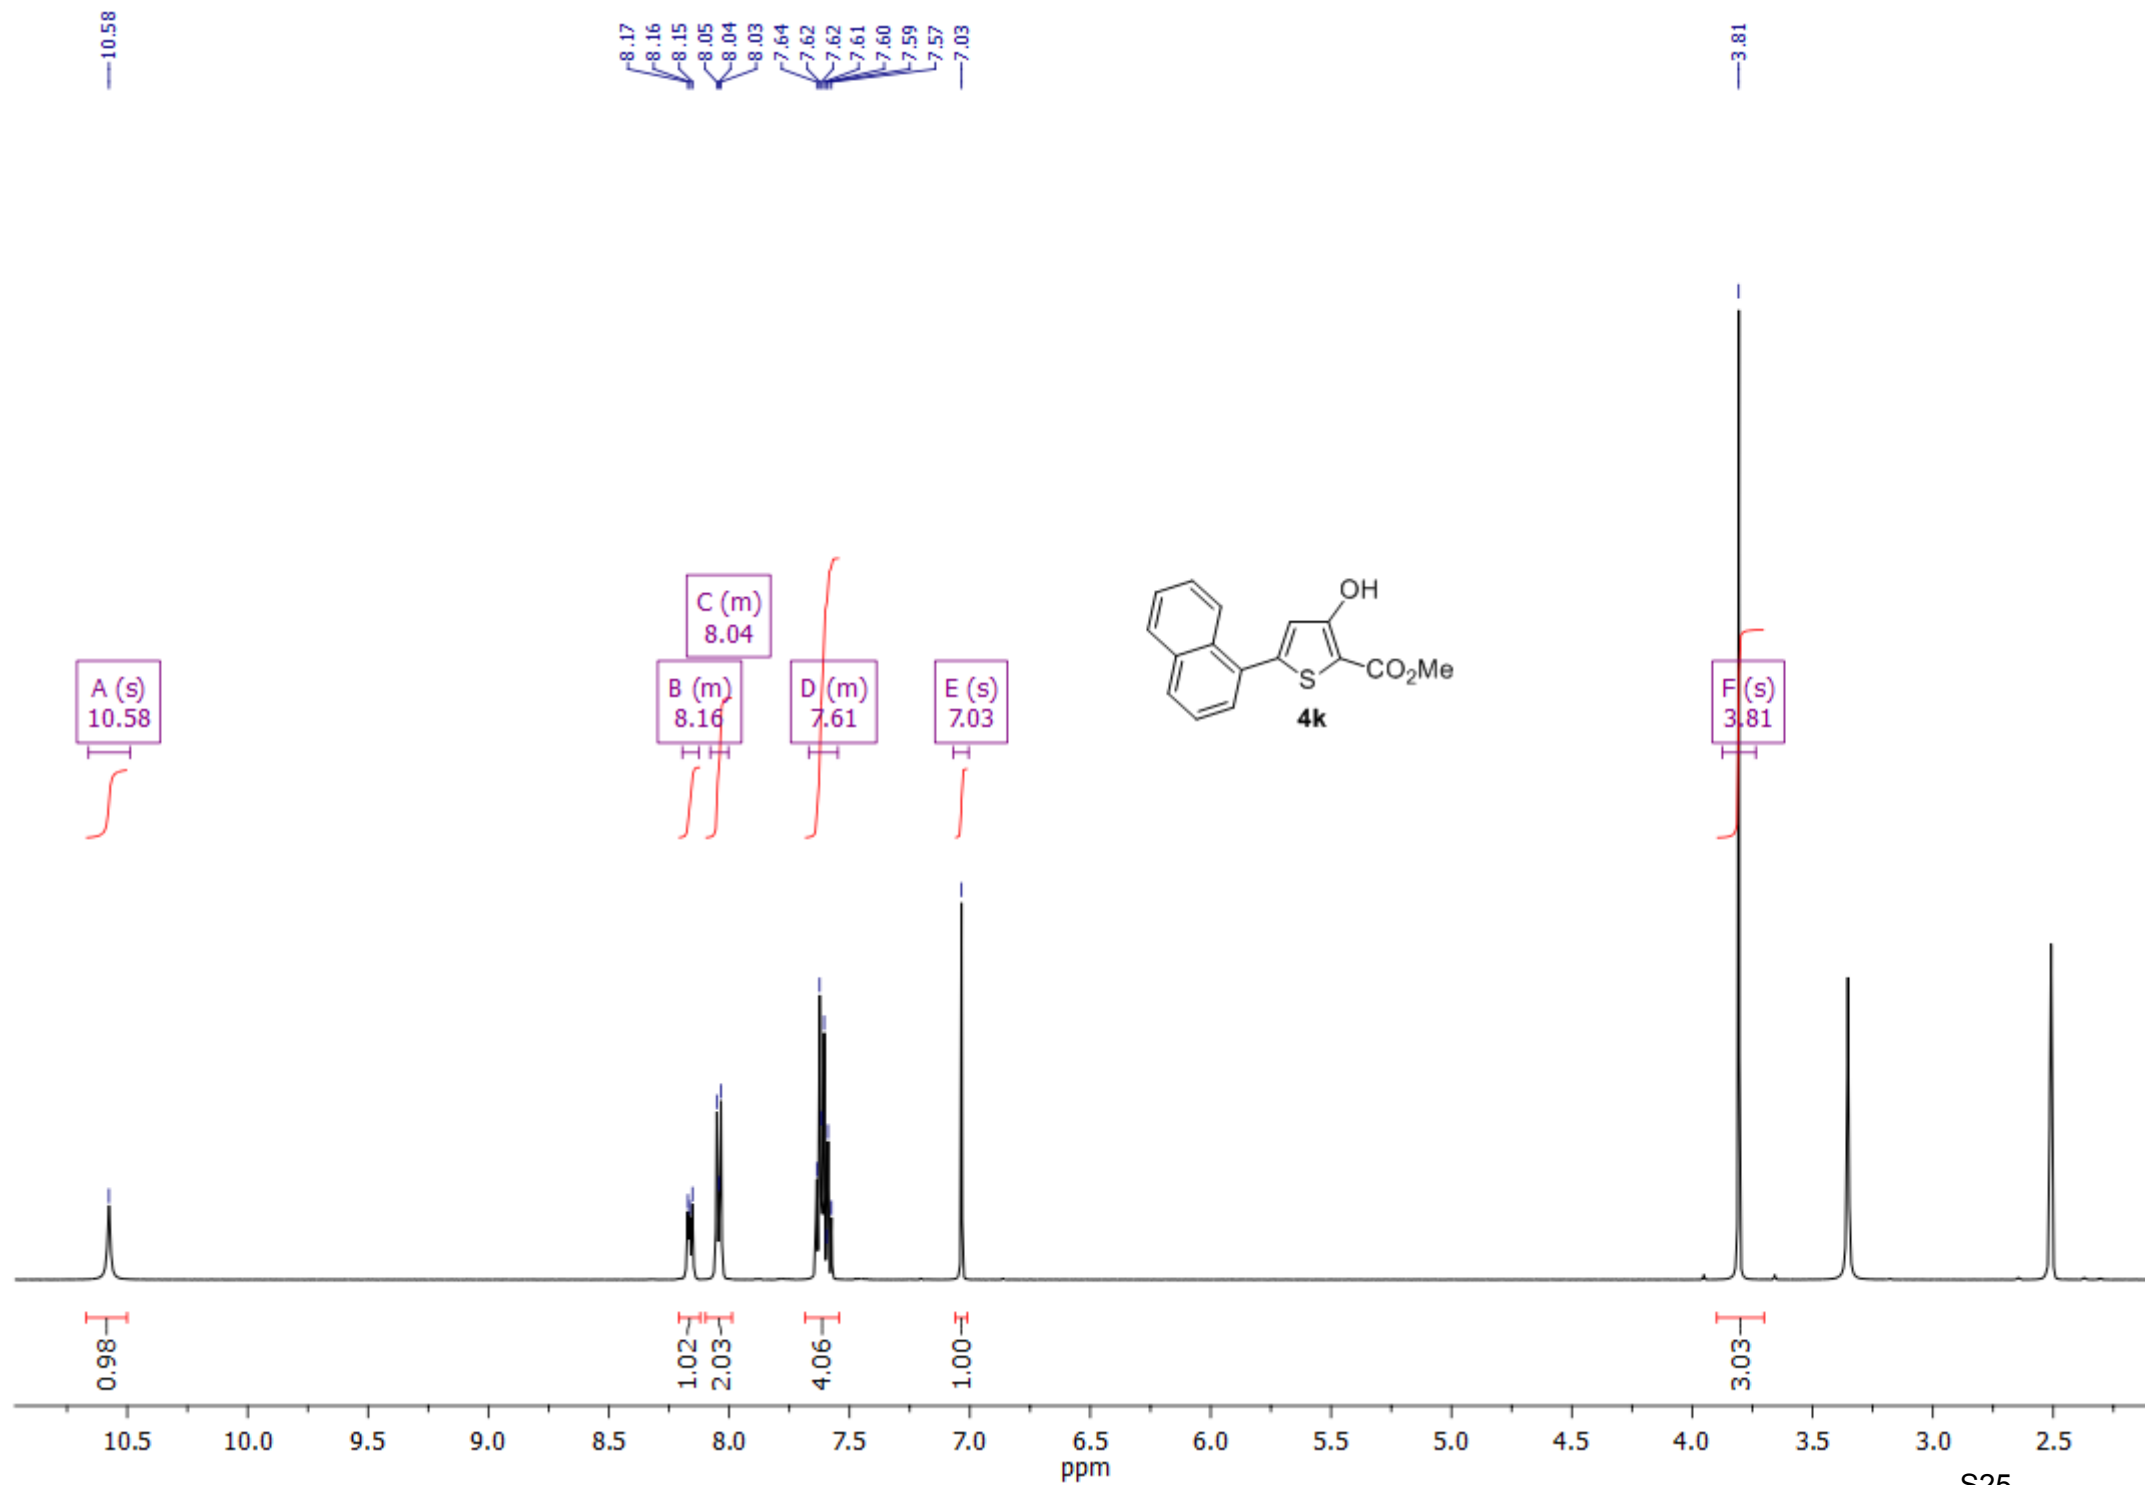

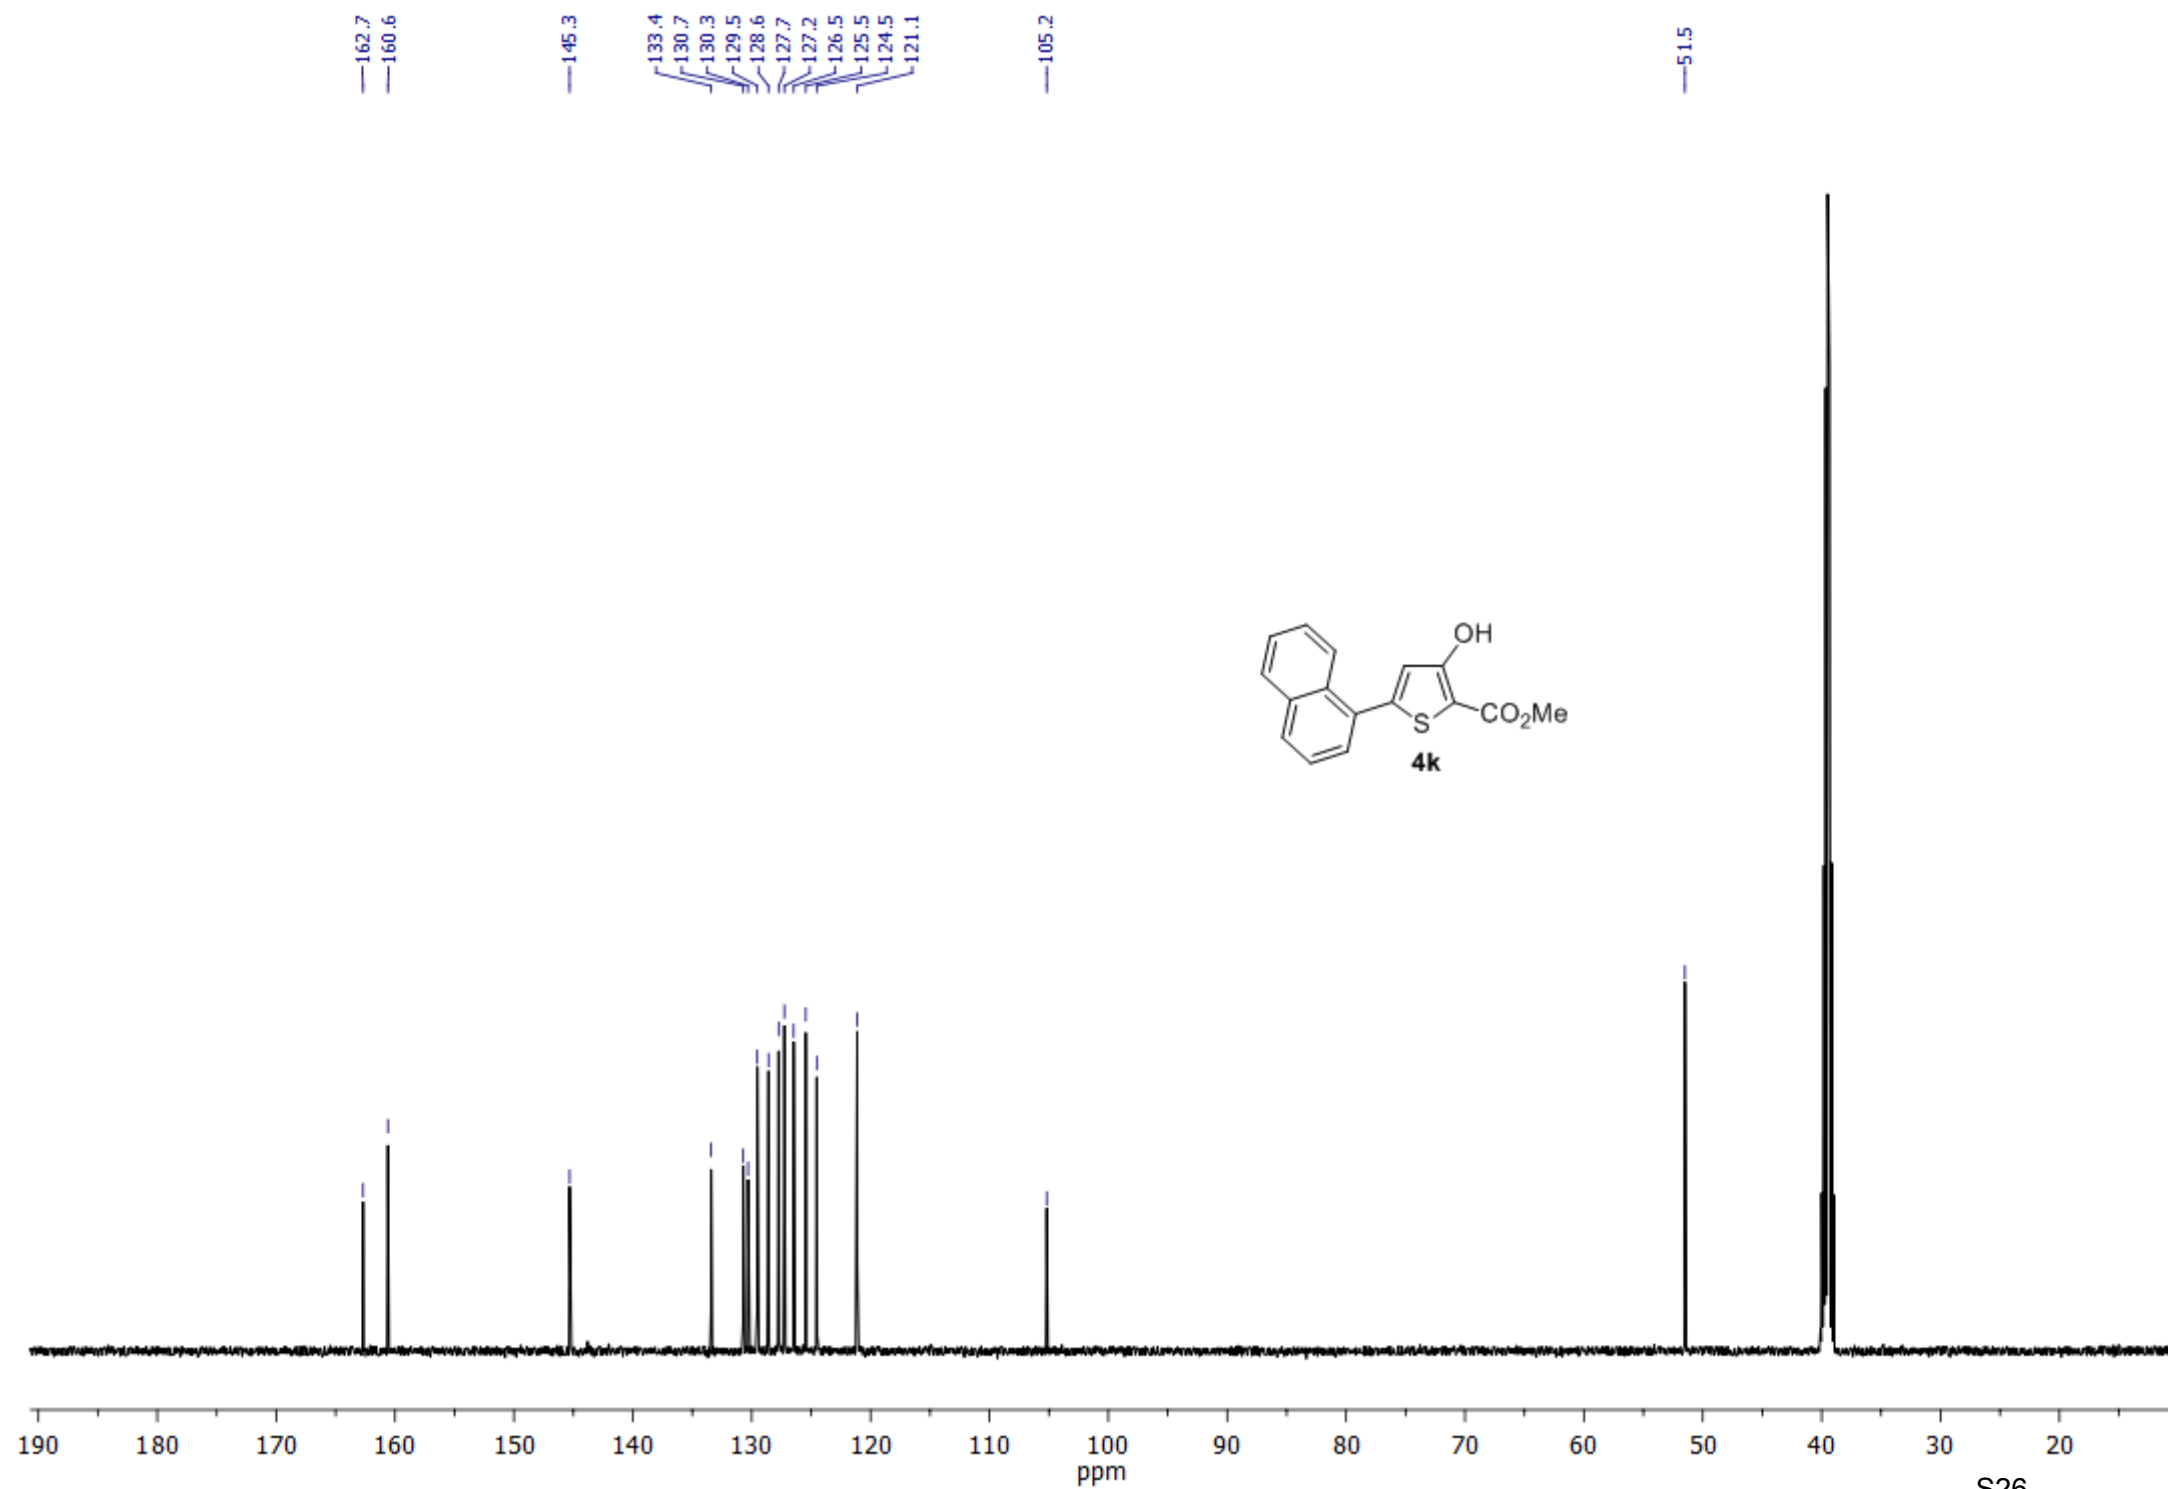

<sup>1</sup>H NMR (solvent: DMSO-*d*<sub>6</sub>)

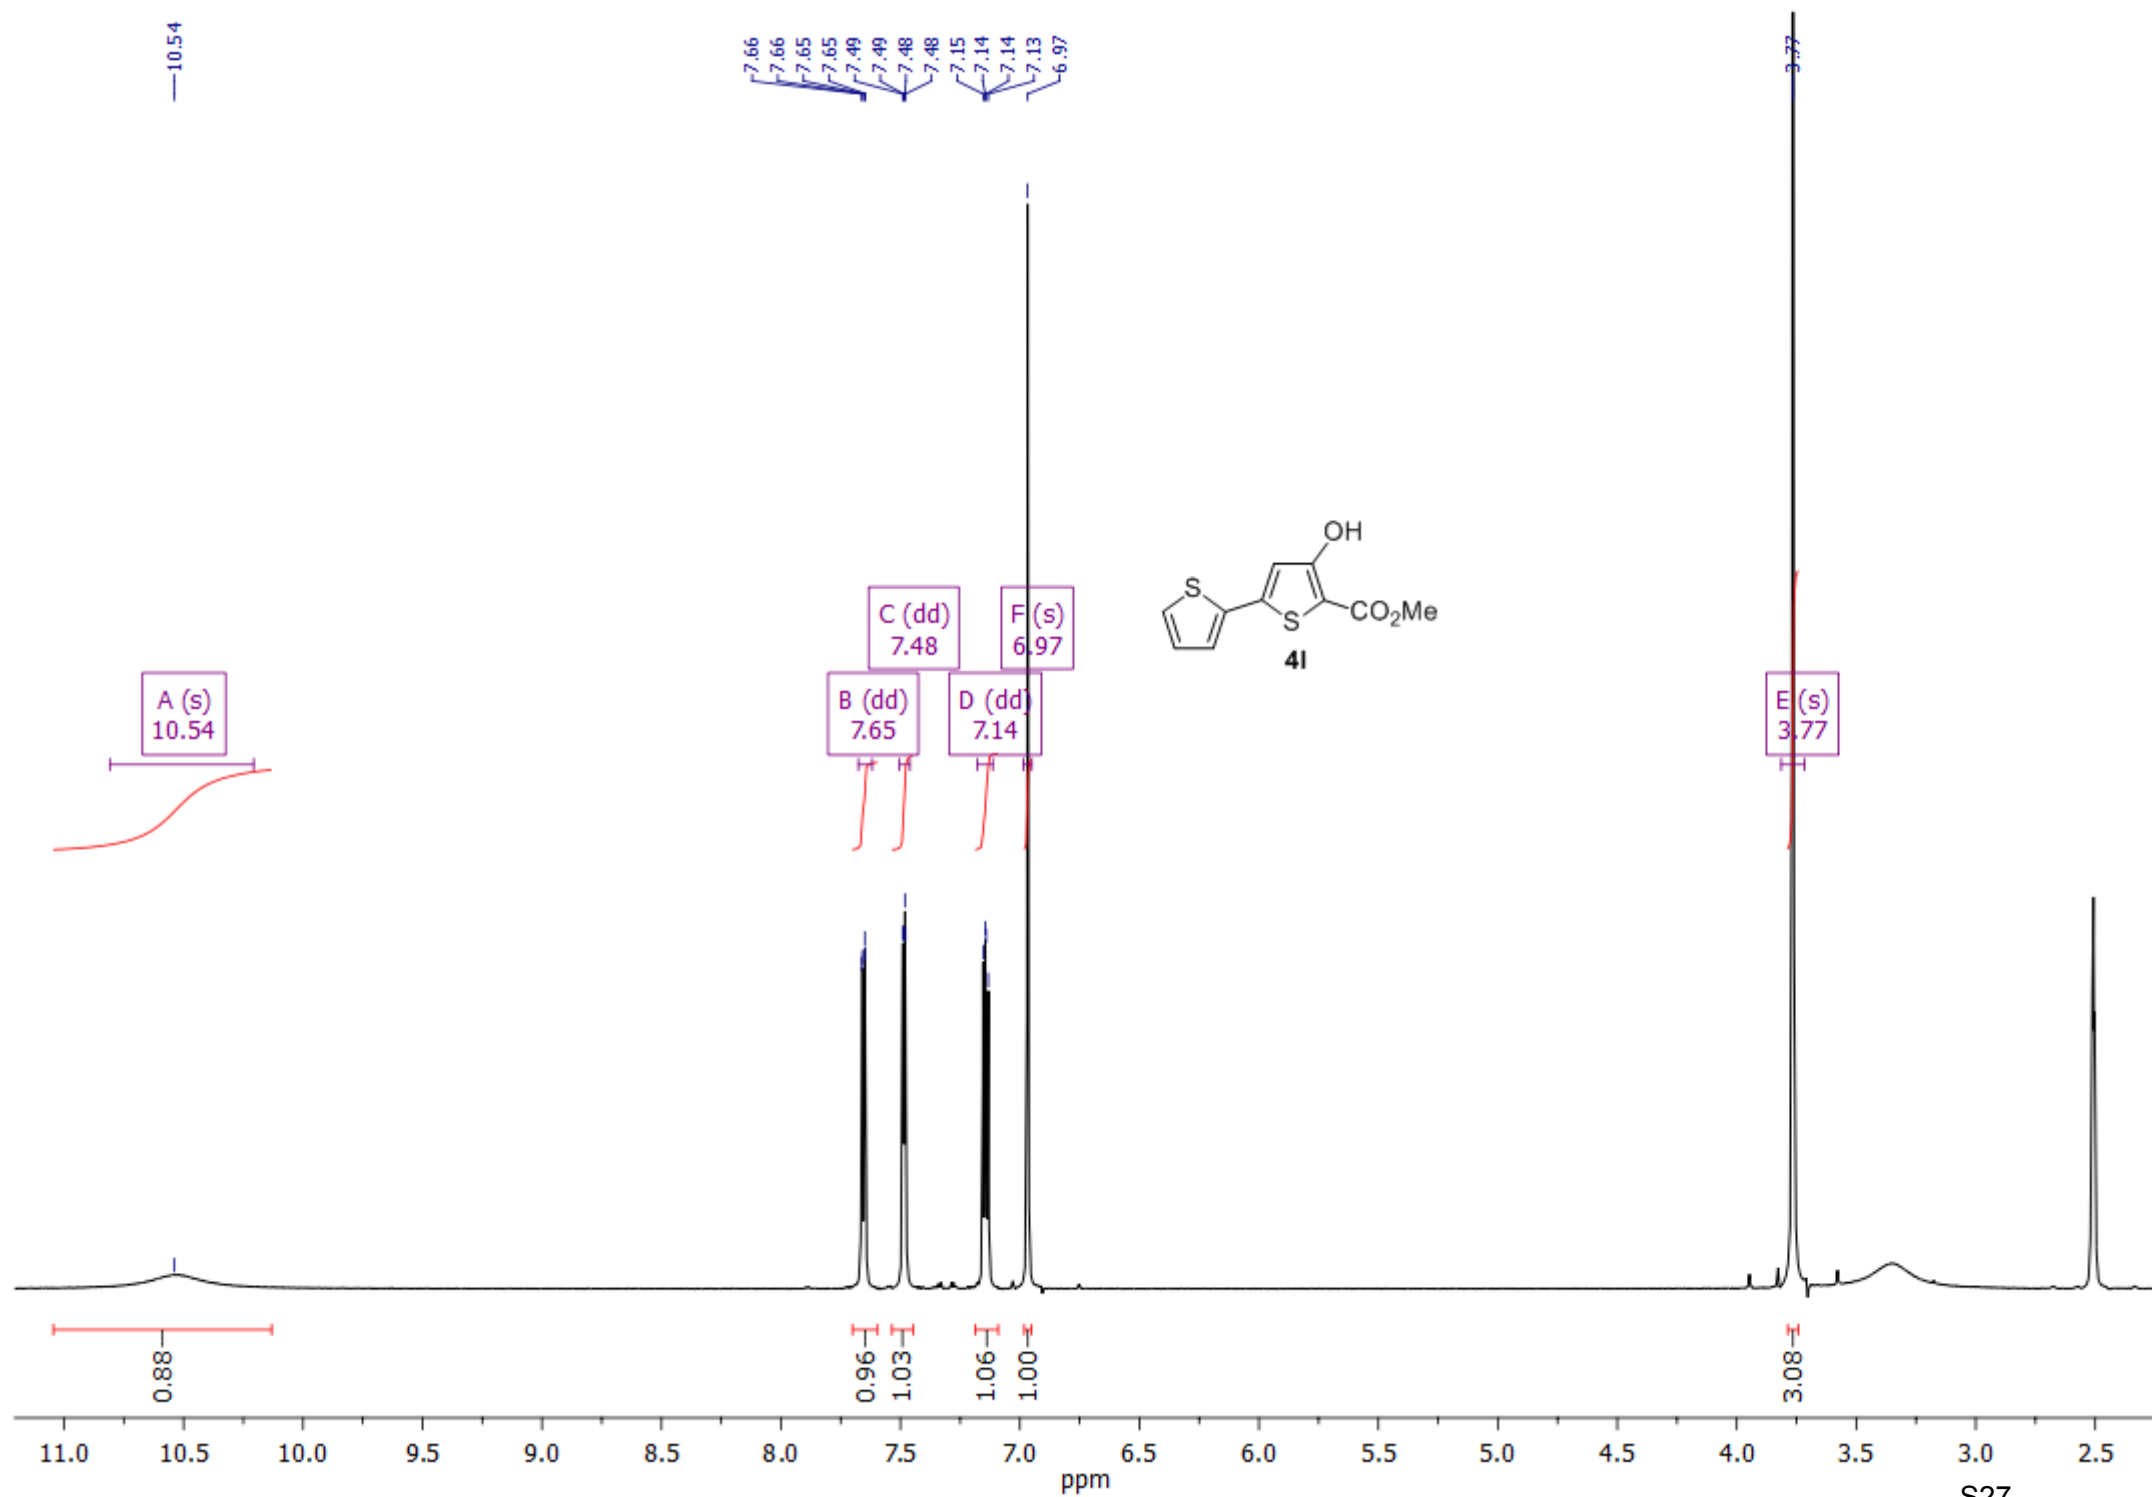

<sup>13</sup>C NMR (solvent: DMSO-*d*<sub>6</sub>)

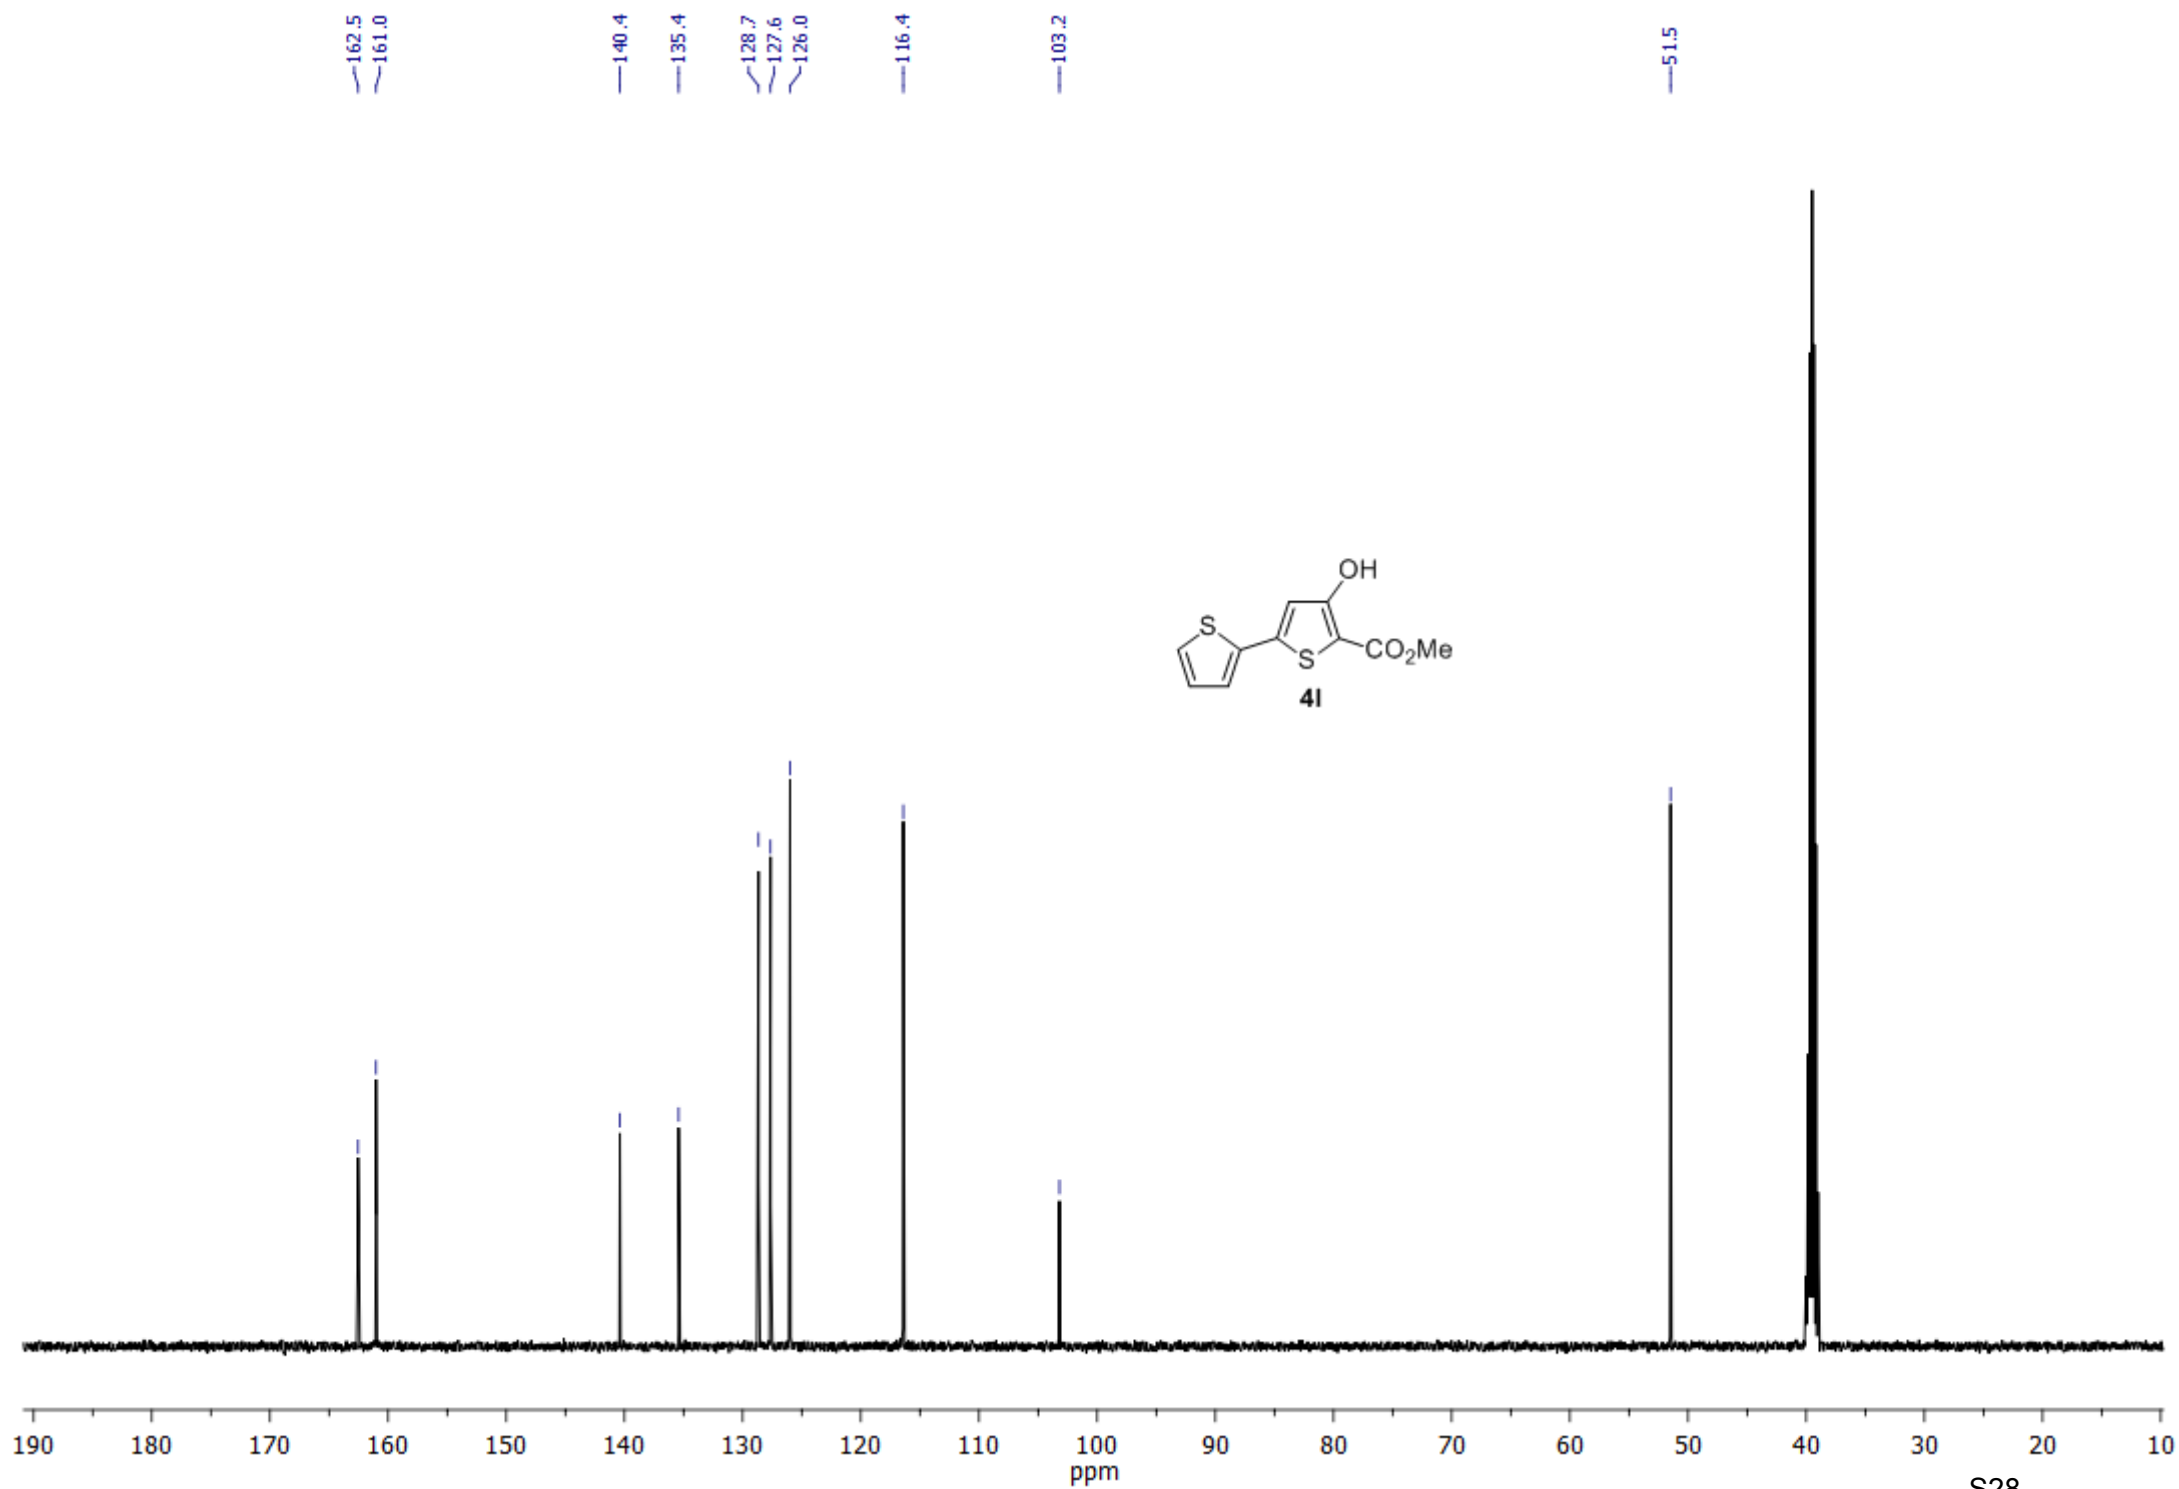

<sup>1</sup>H NMR (solvent: DMSO-*d*<sub>6</sub>)

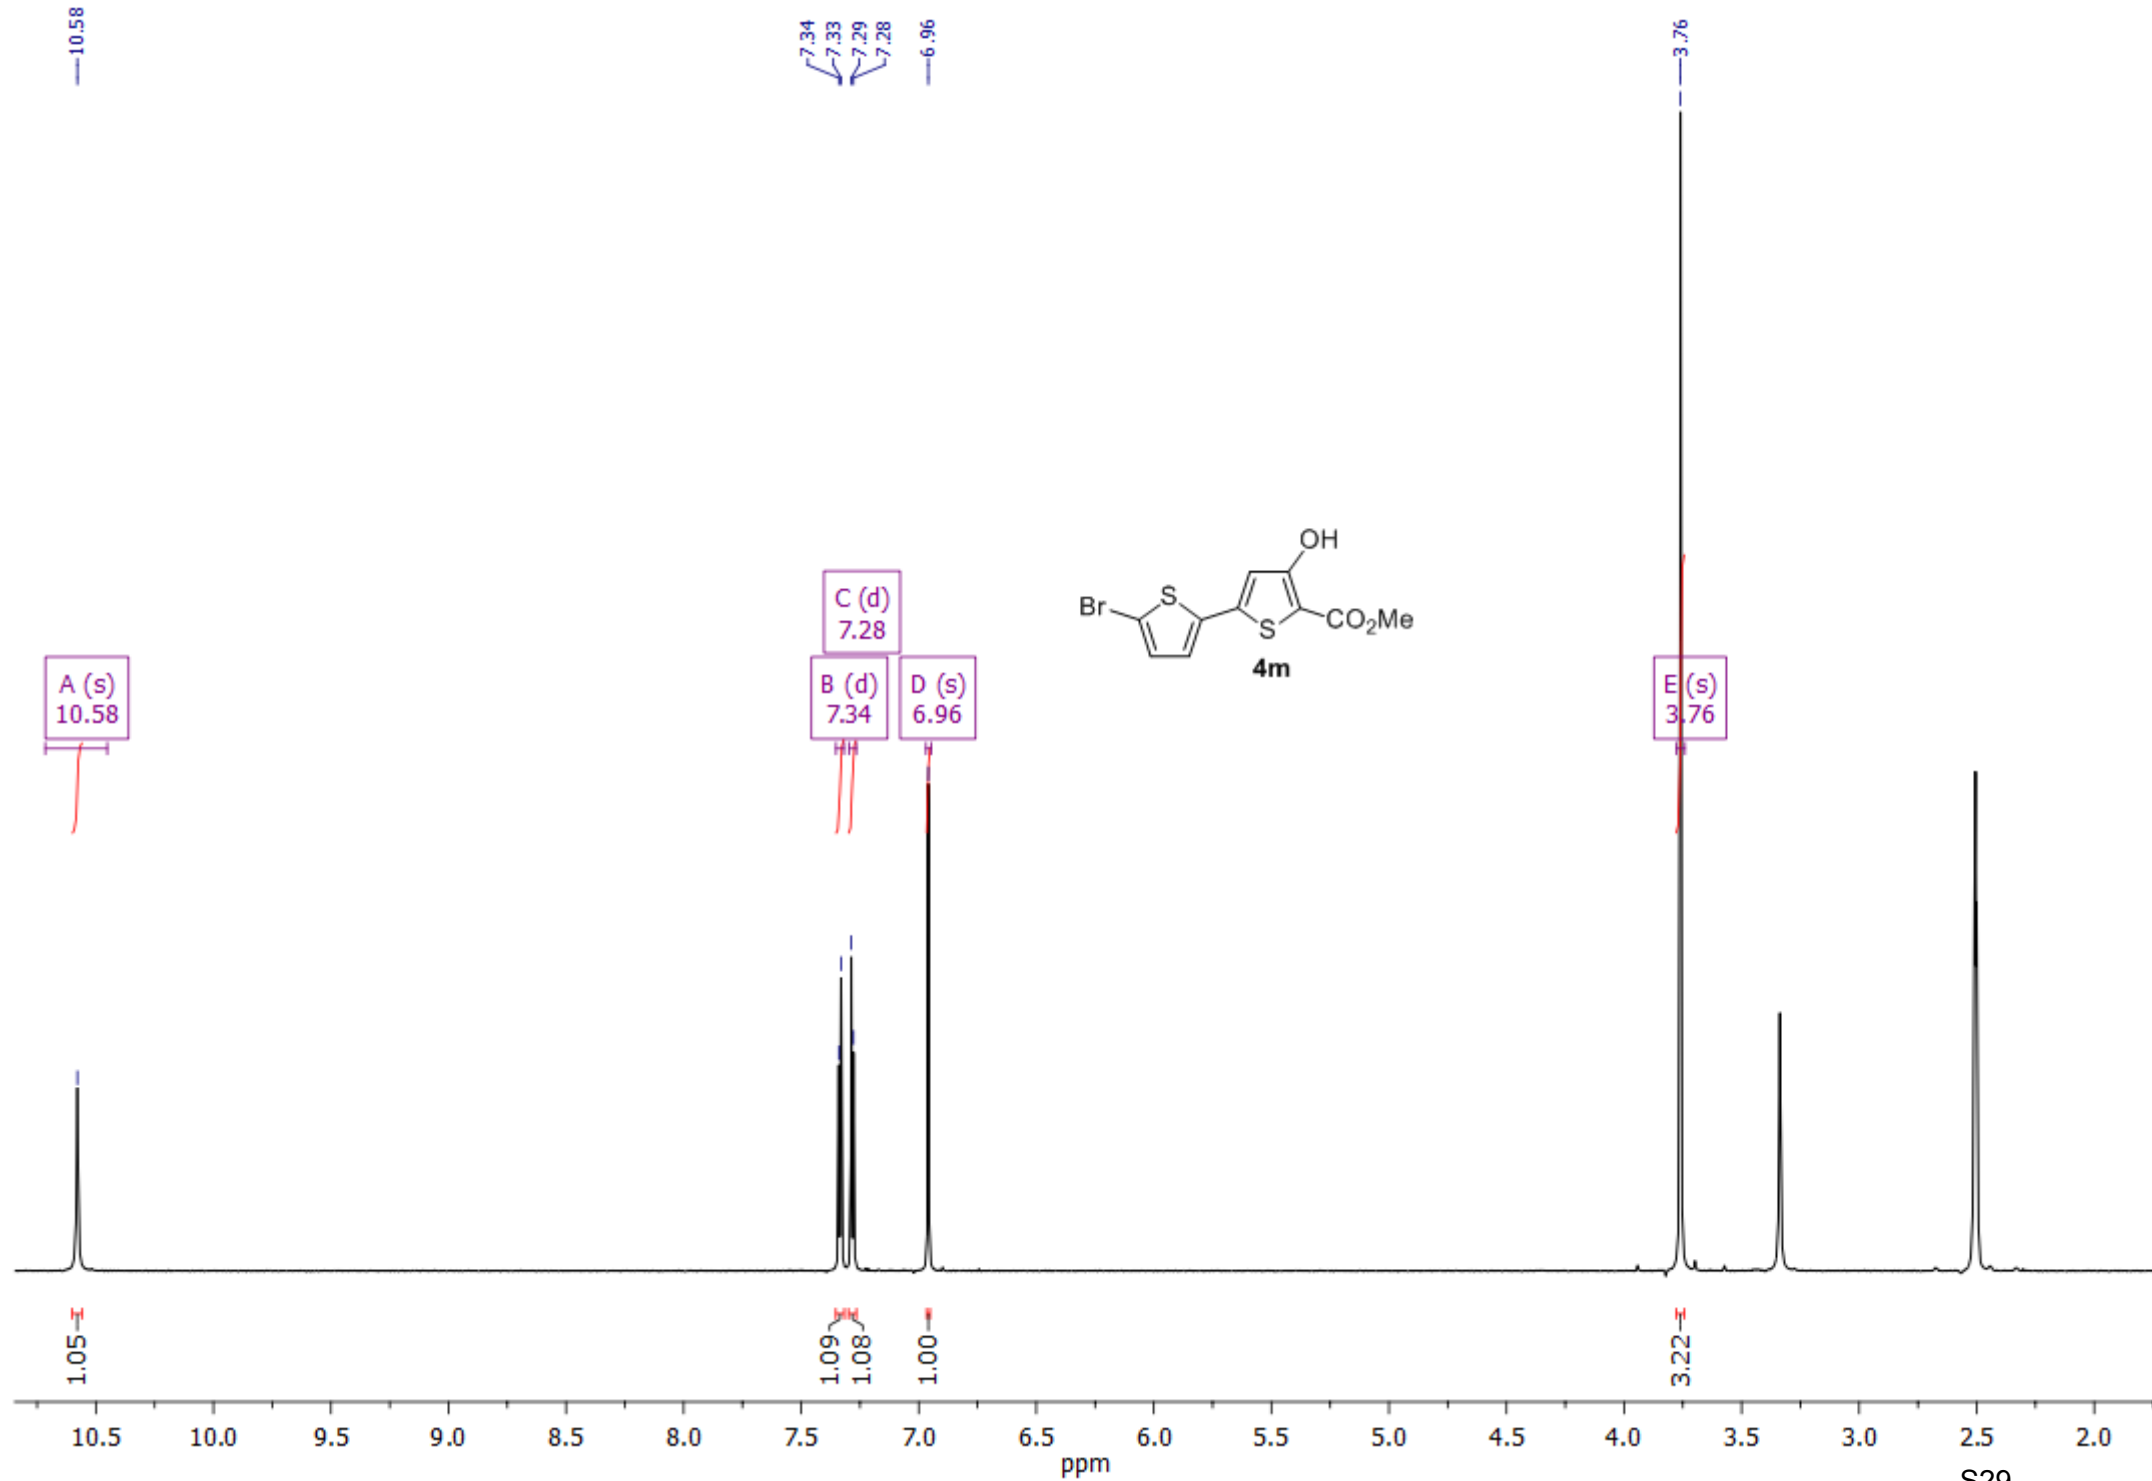

<sup>13</sup>C NMR (solvent: DMSO-*d*<sub>6</sub>)

162.4  
160.8  
138.8  
137.0  
131.9  
126.6  
116.9  
112.6  
103.8  
51.5

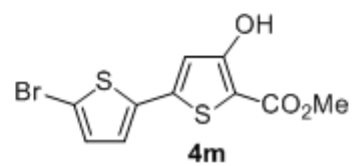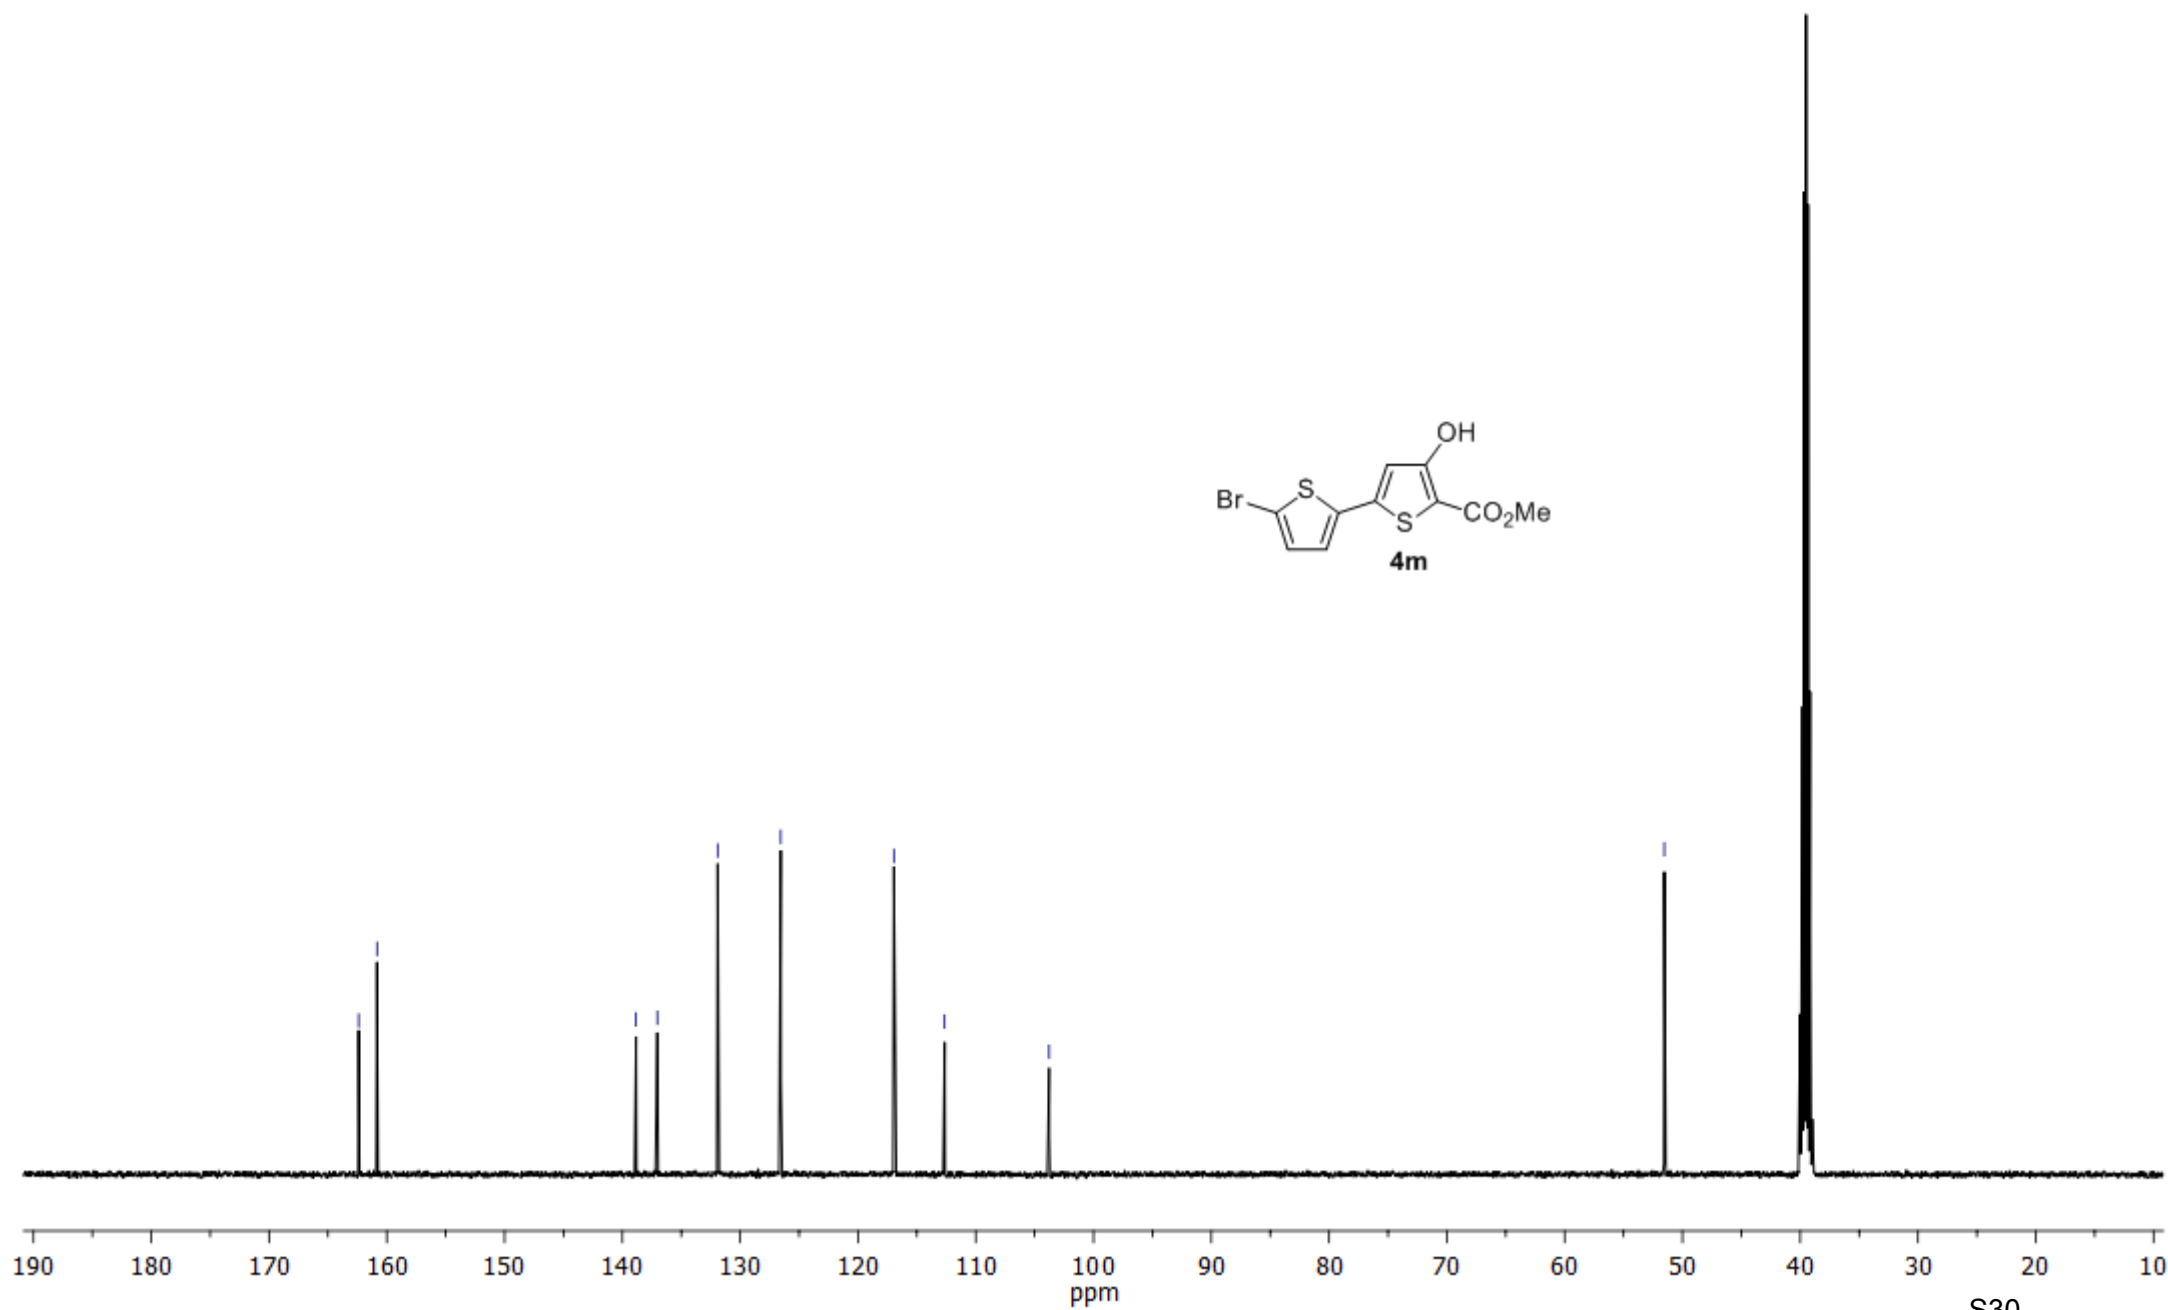

<sup>1</sup>H NMR (solvent: DMSO-*d*<sub>6</sub>)

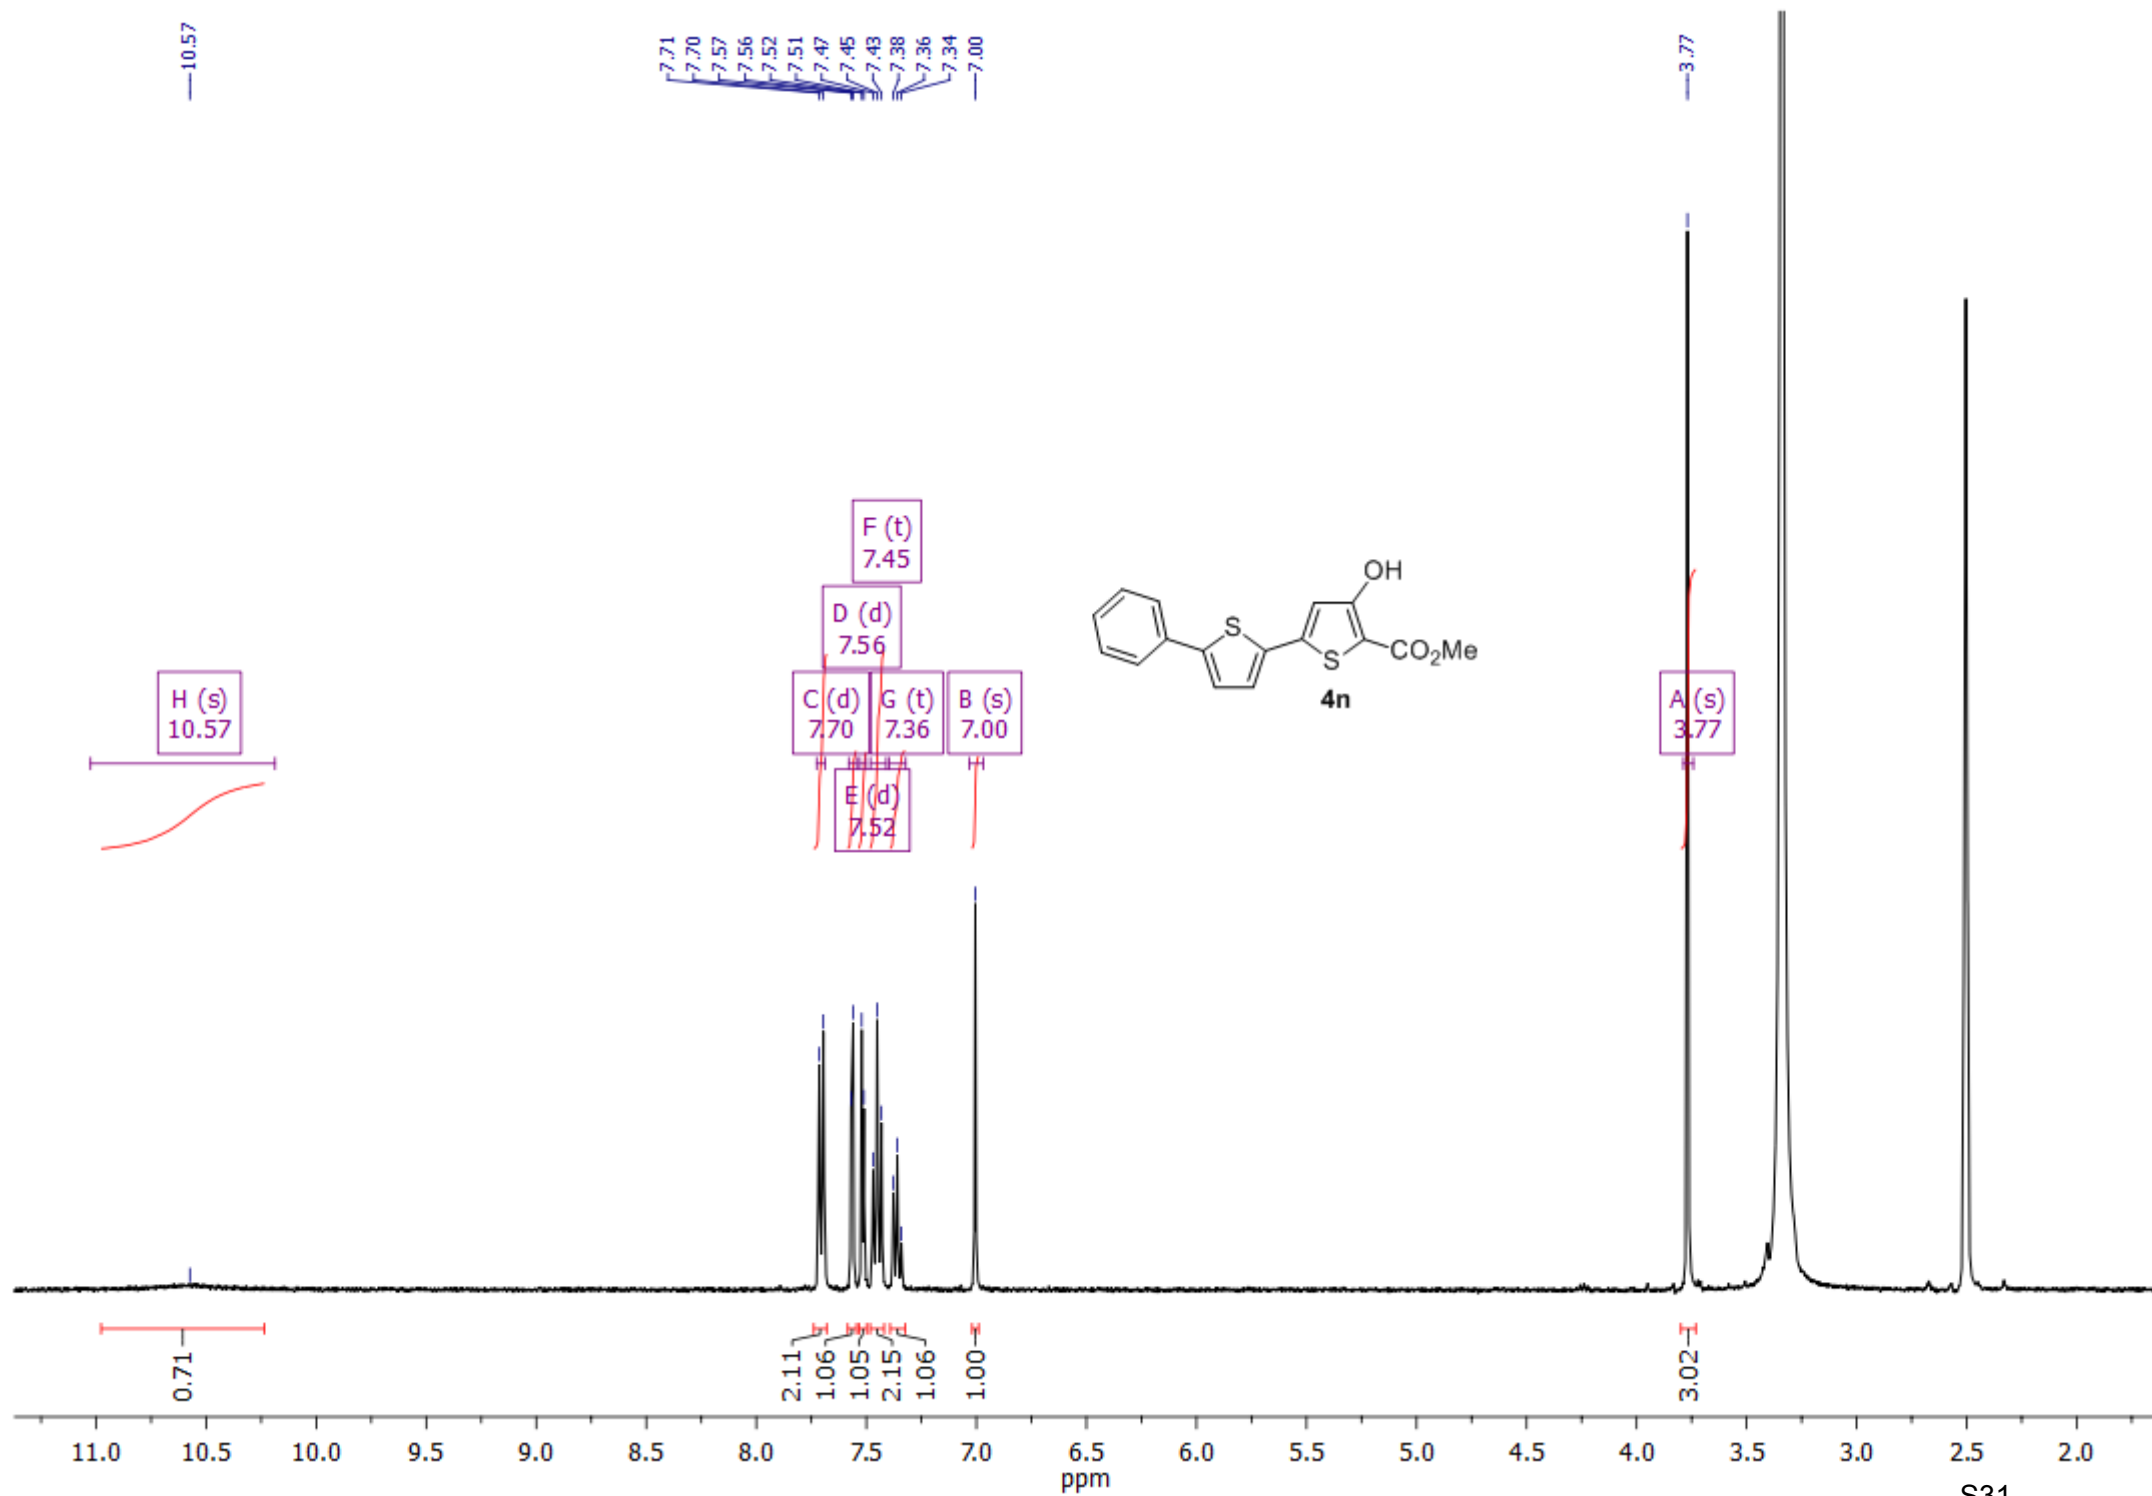

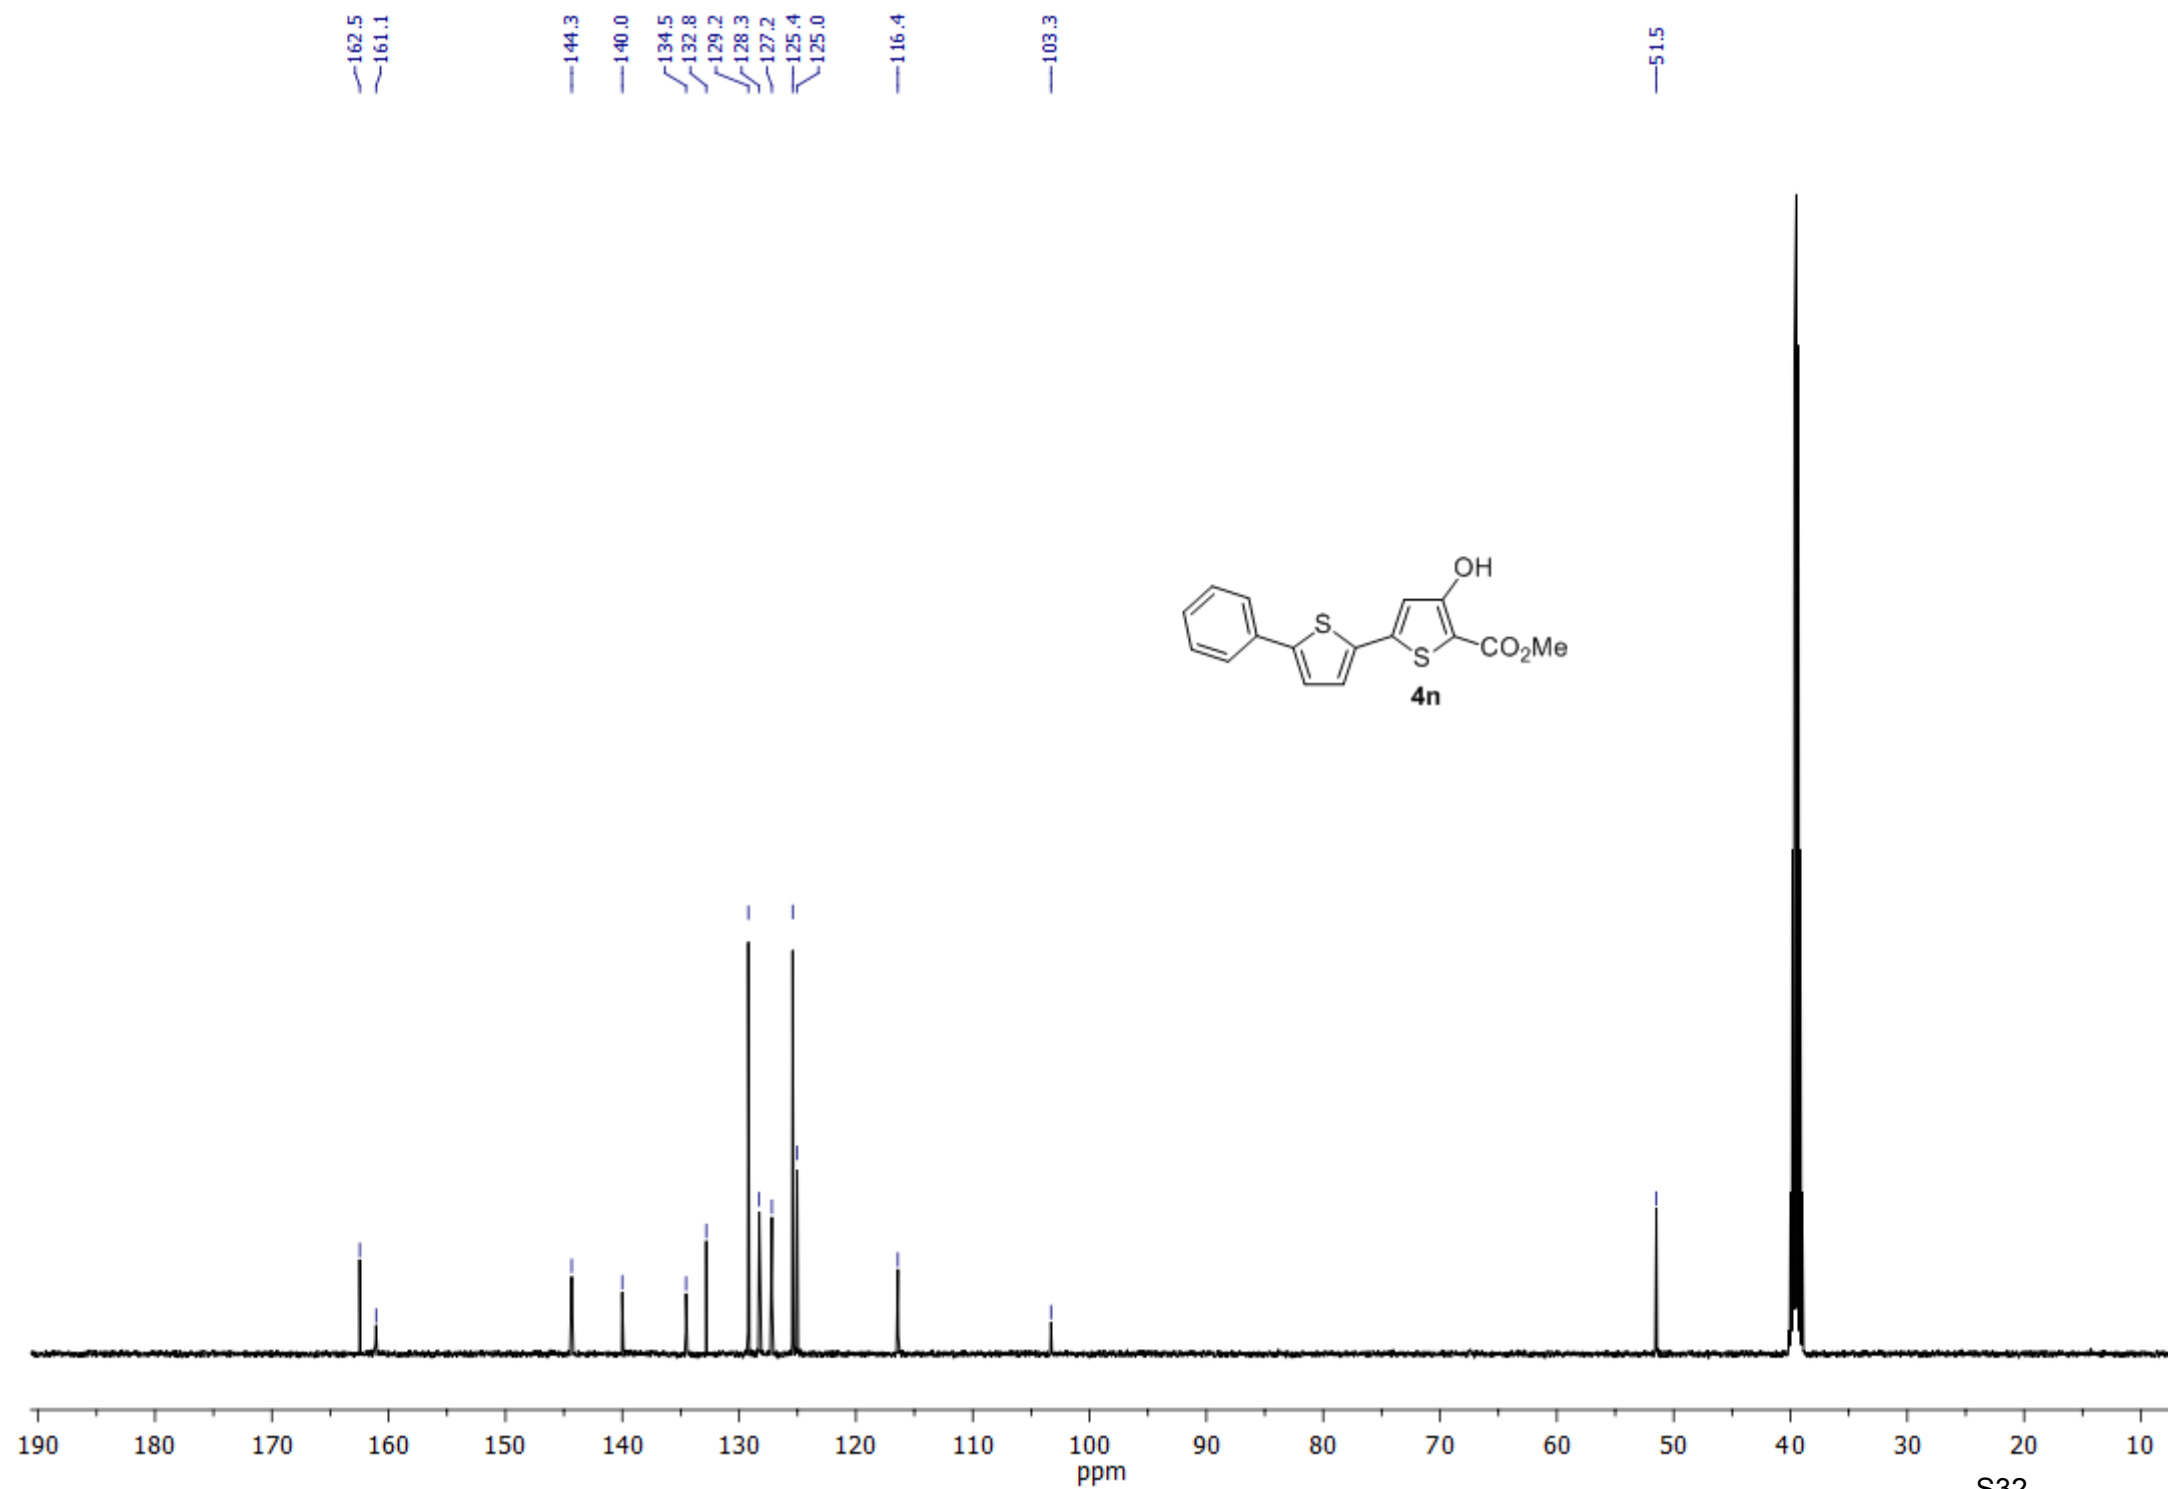



<sup>1</sup>H NMR (solvent: CDCl<sub>3</sub>)

7.67  
7.66  
7.62  
7.51  
7.50  
7.46  
7.44

6.56

3.80

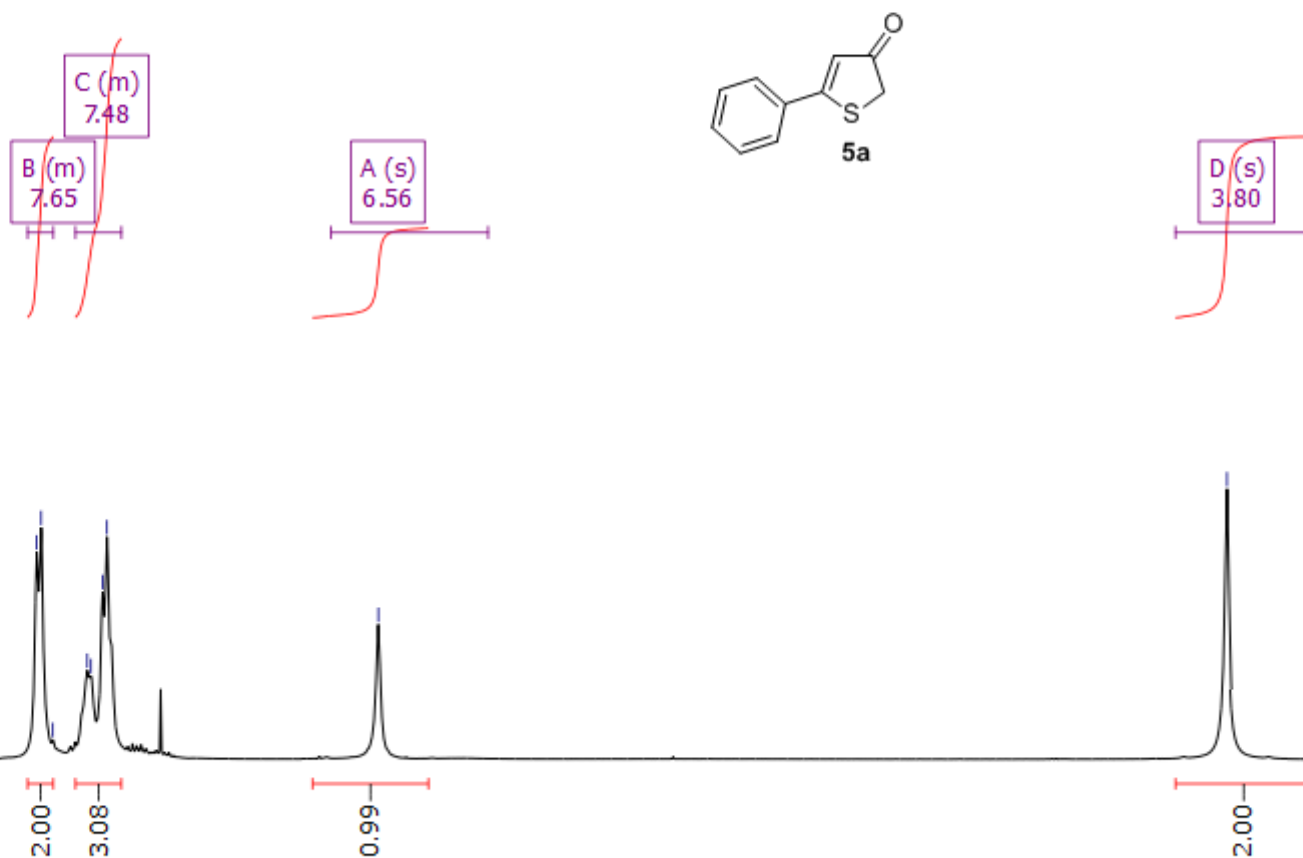

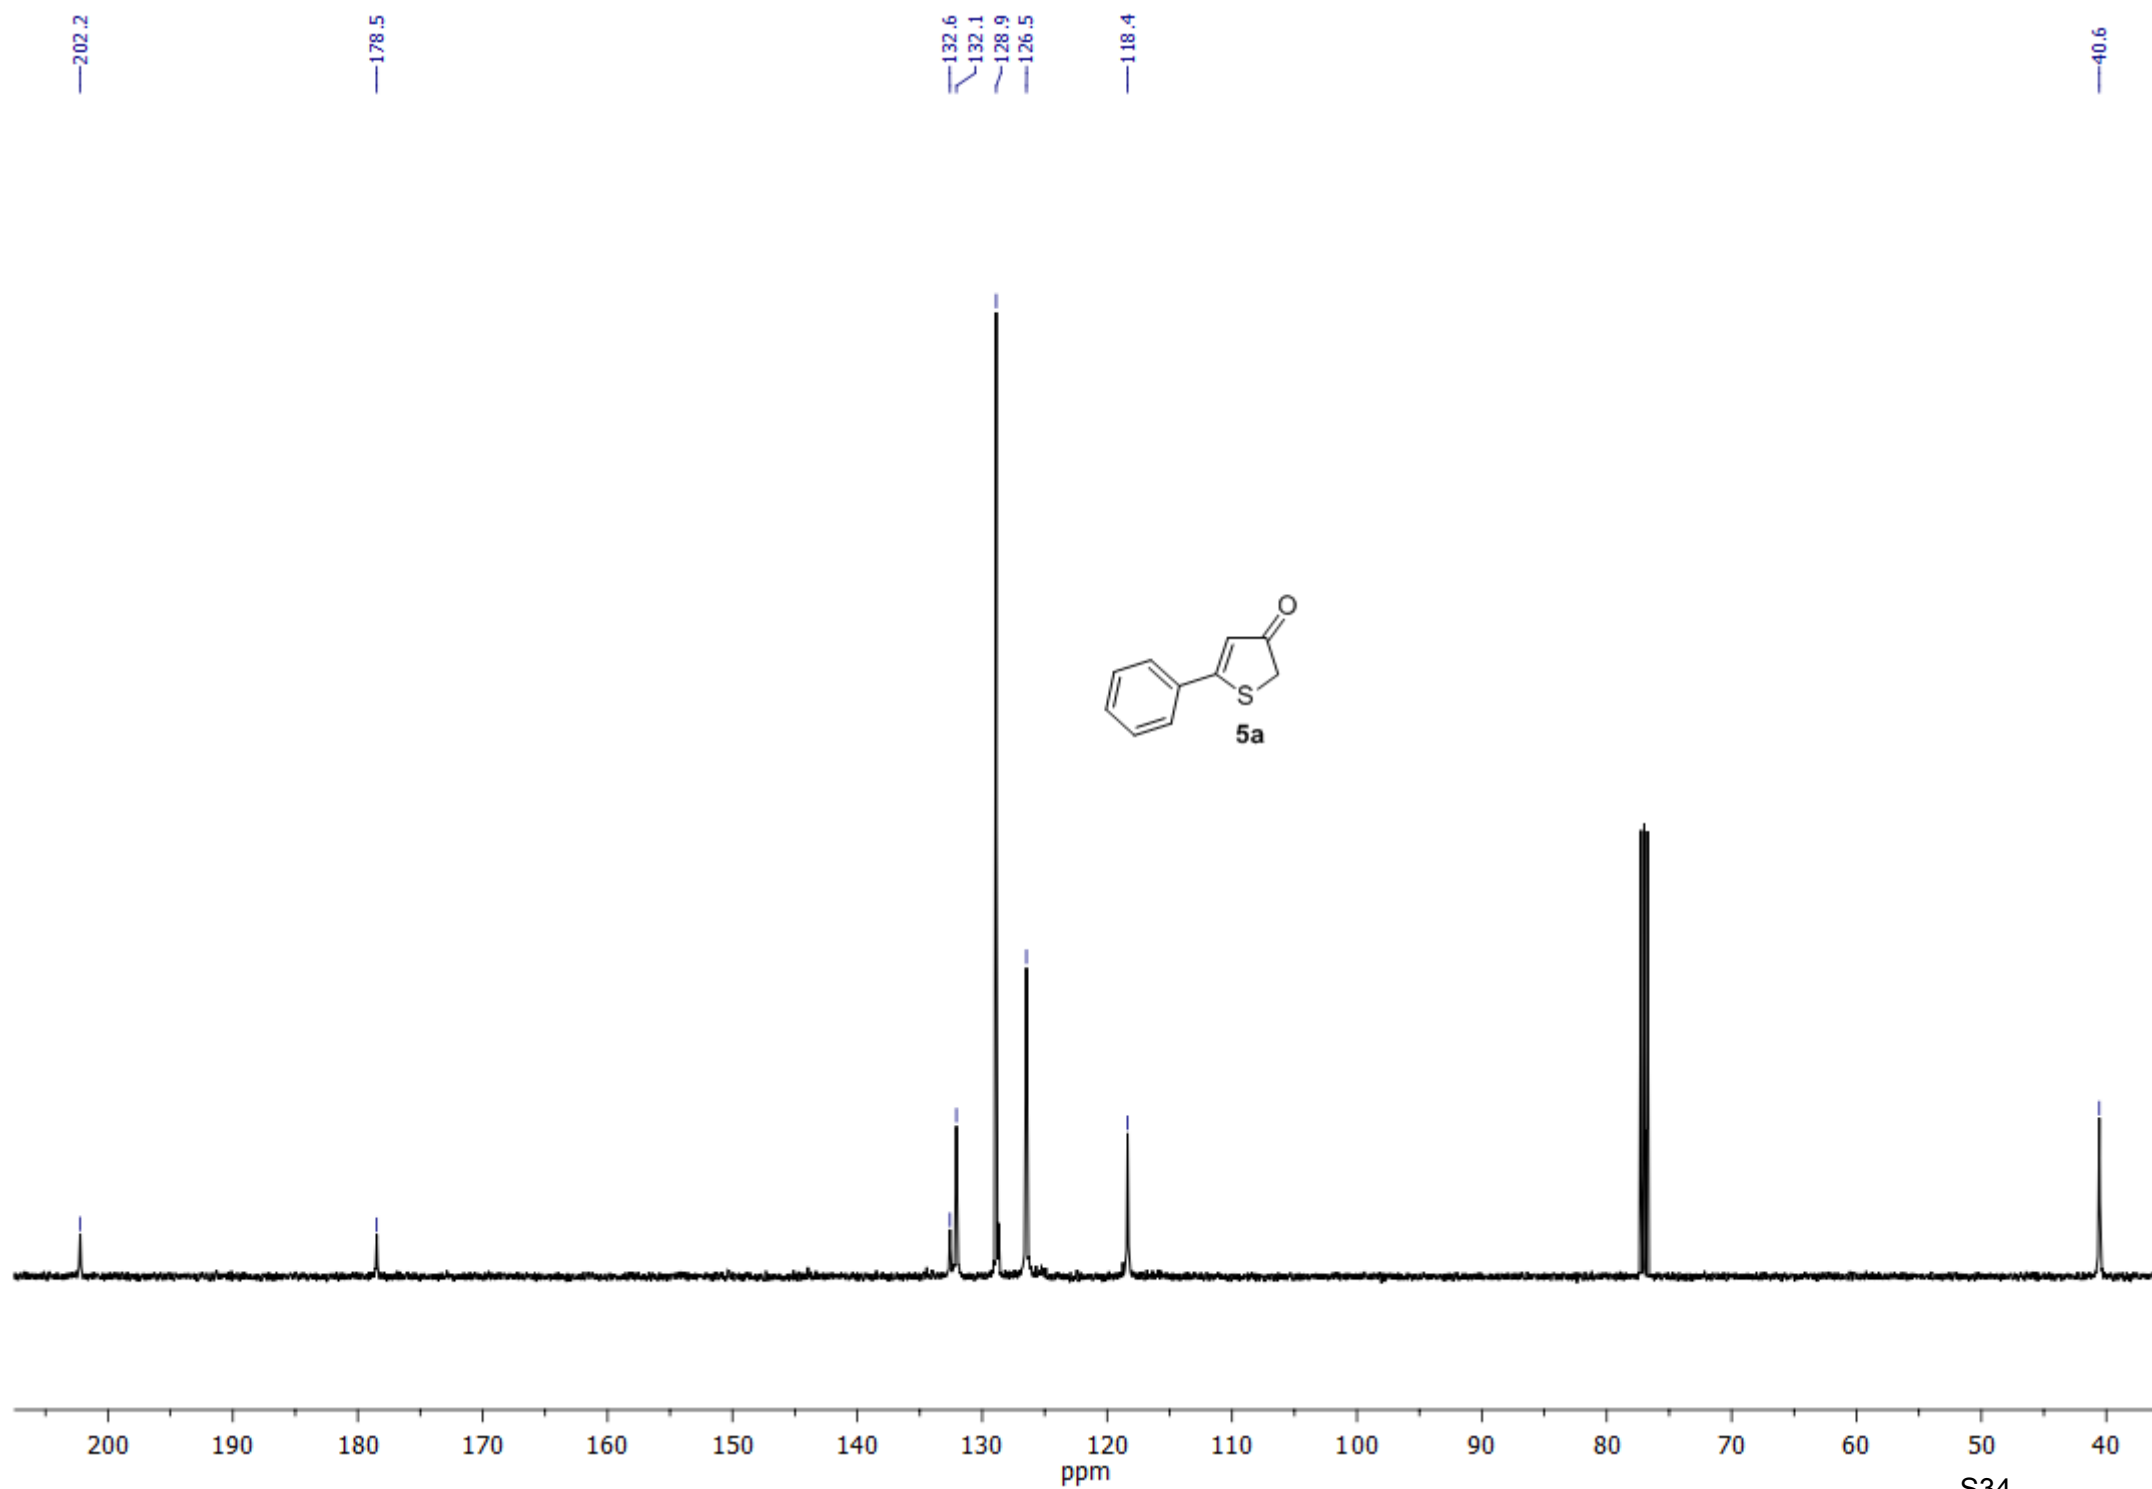

<sup>1</sup>H NMR (solvent: CDCl<sub>3</sub>)

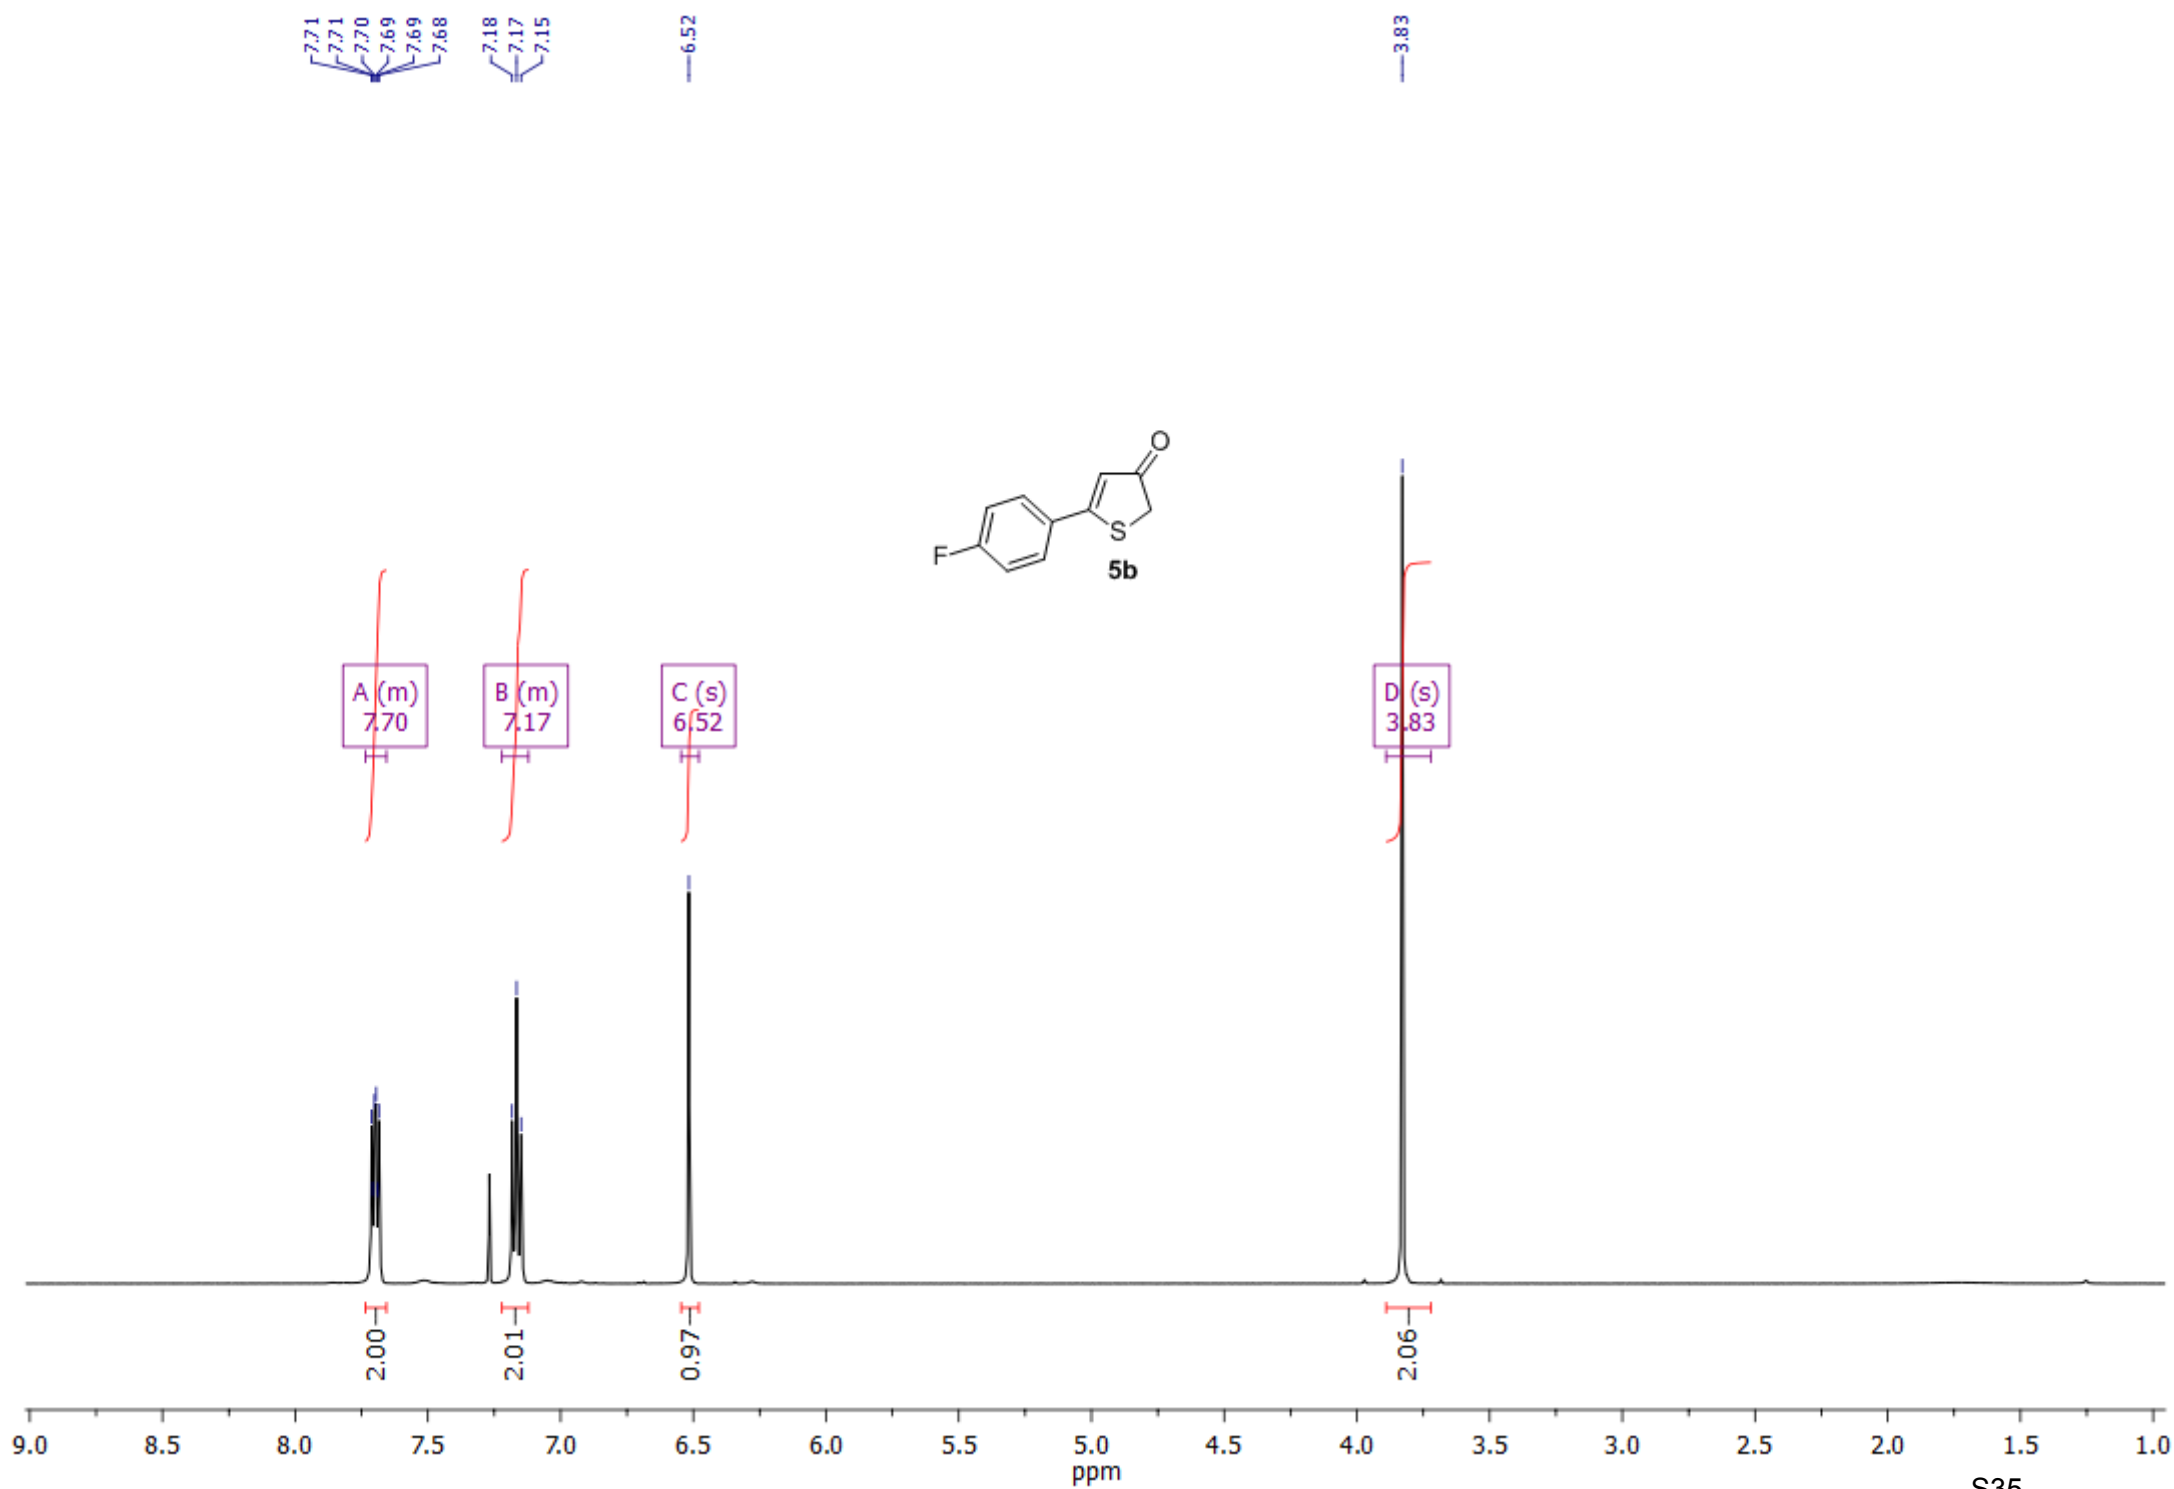

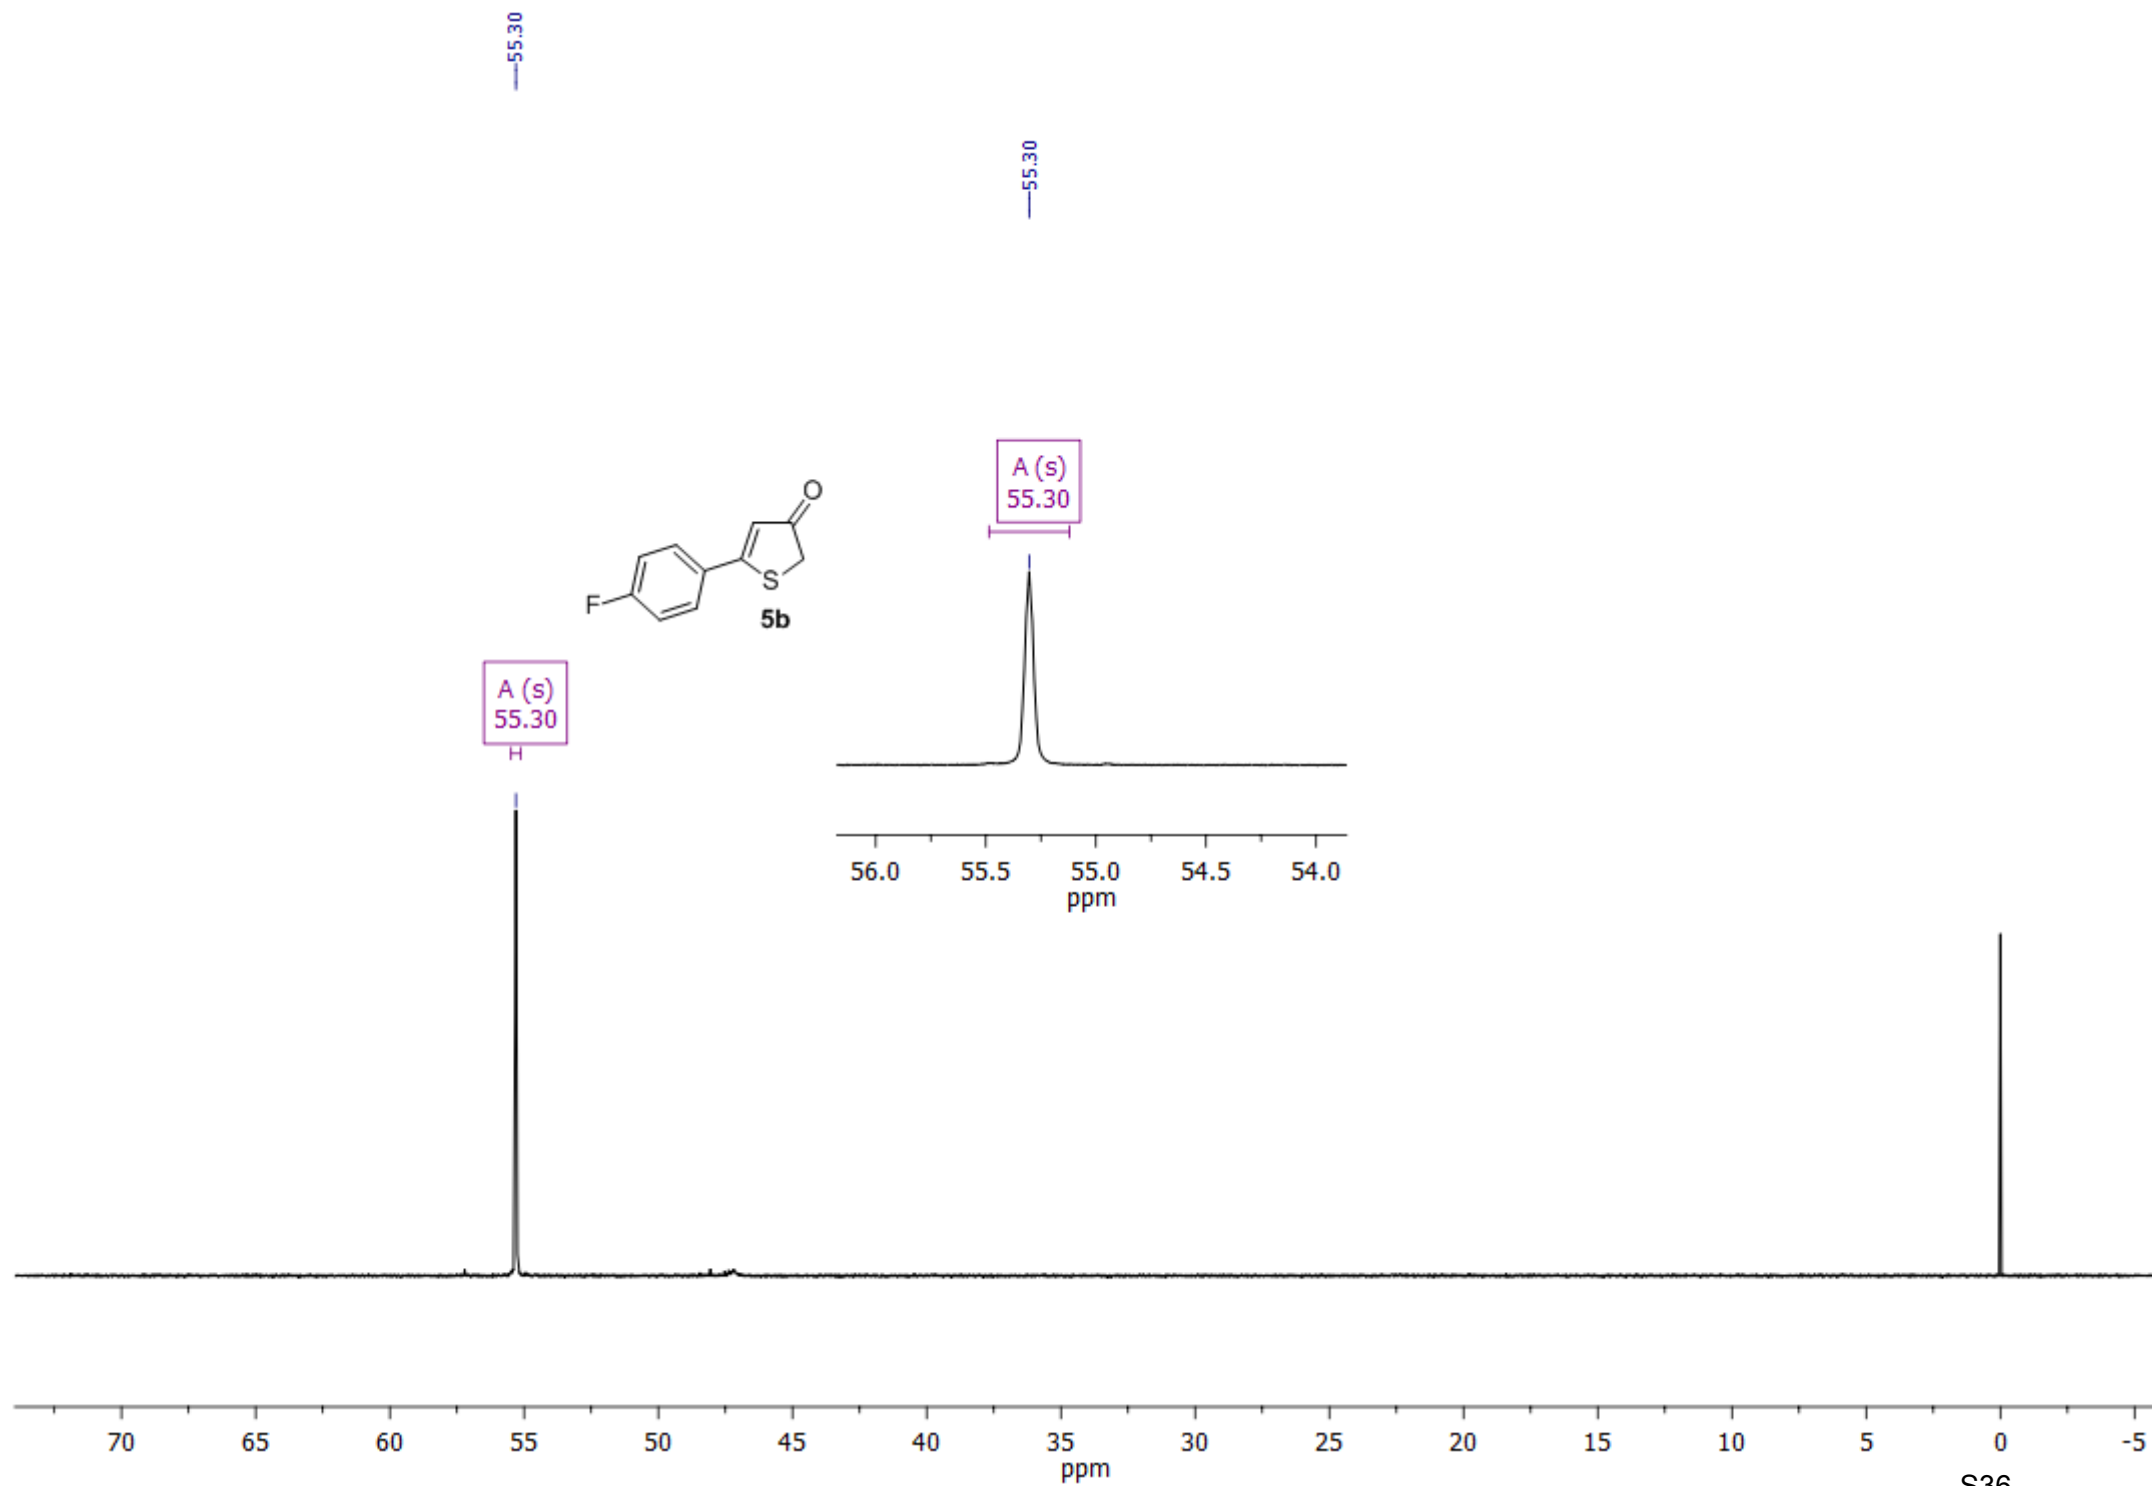

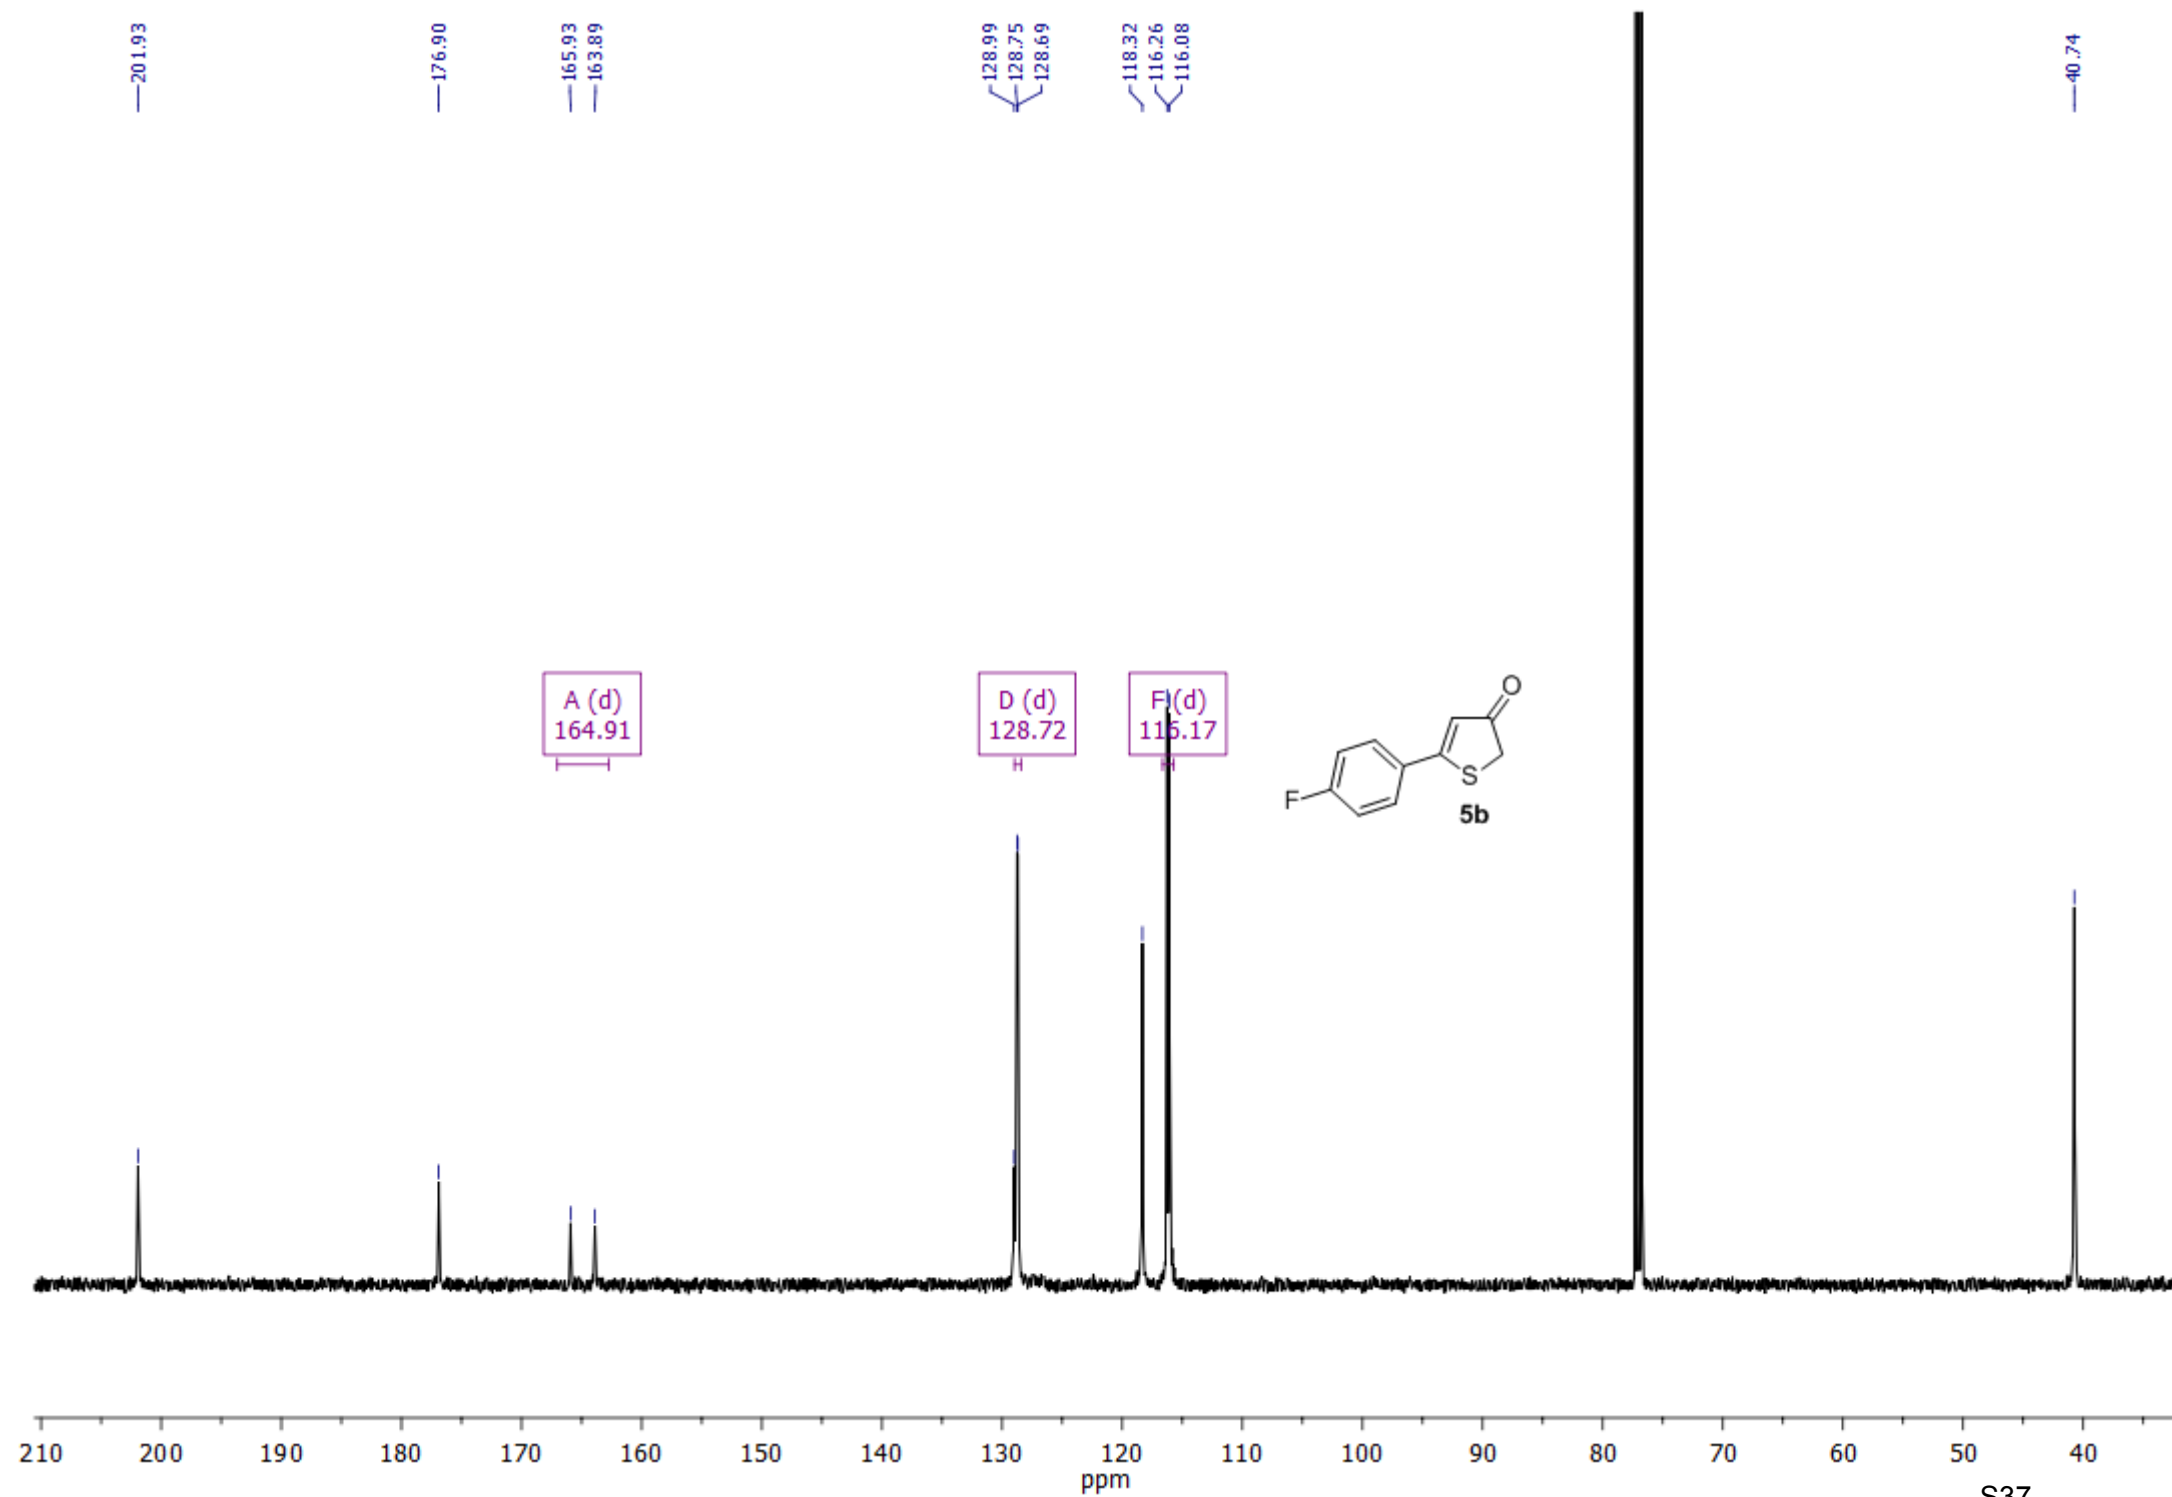

<sup>1</sup>H NMR (solvent: CDCl<sub>3</sub>)

7.62  
7.60  
7.55  
7.54

6.55

3.82

B (d)  
7.55  
A (d)  
7.61  
HH

C (s)  
6.55

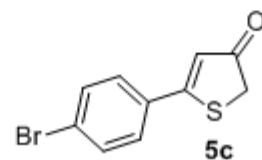

D (s)  
3.82

4.11

1.00

2.02

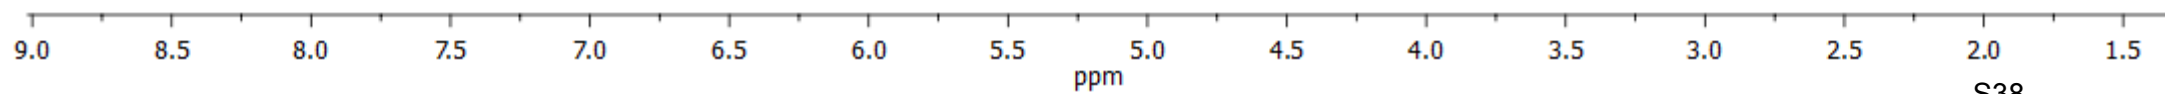

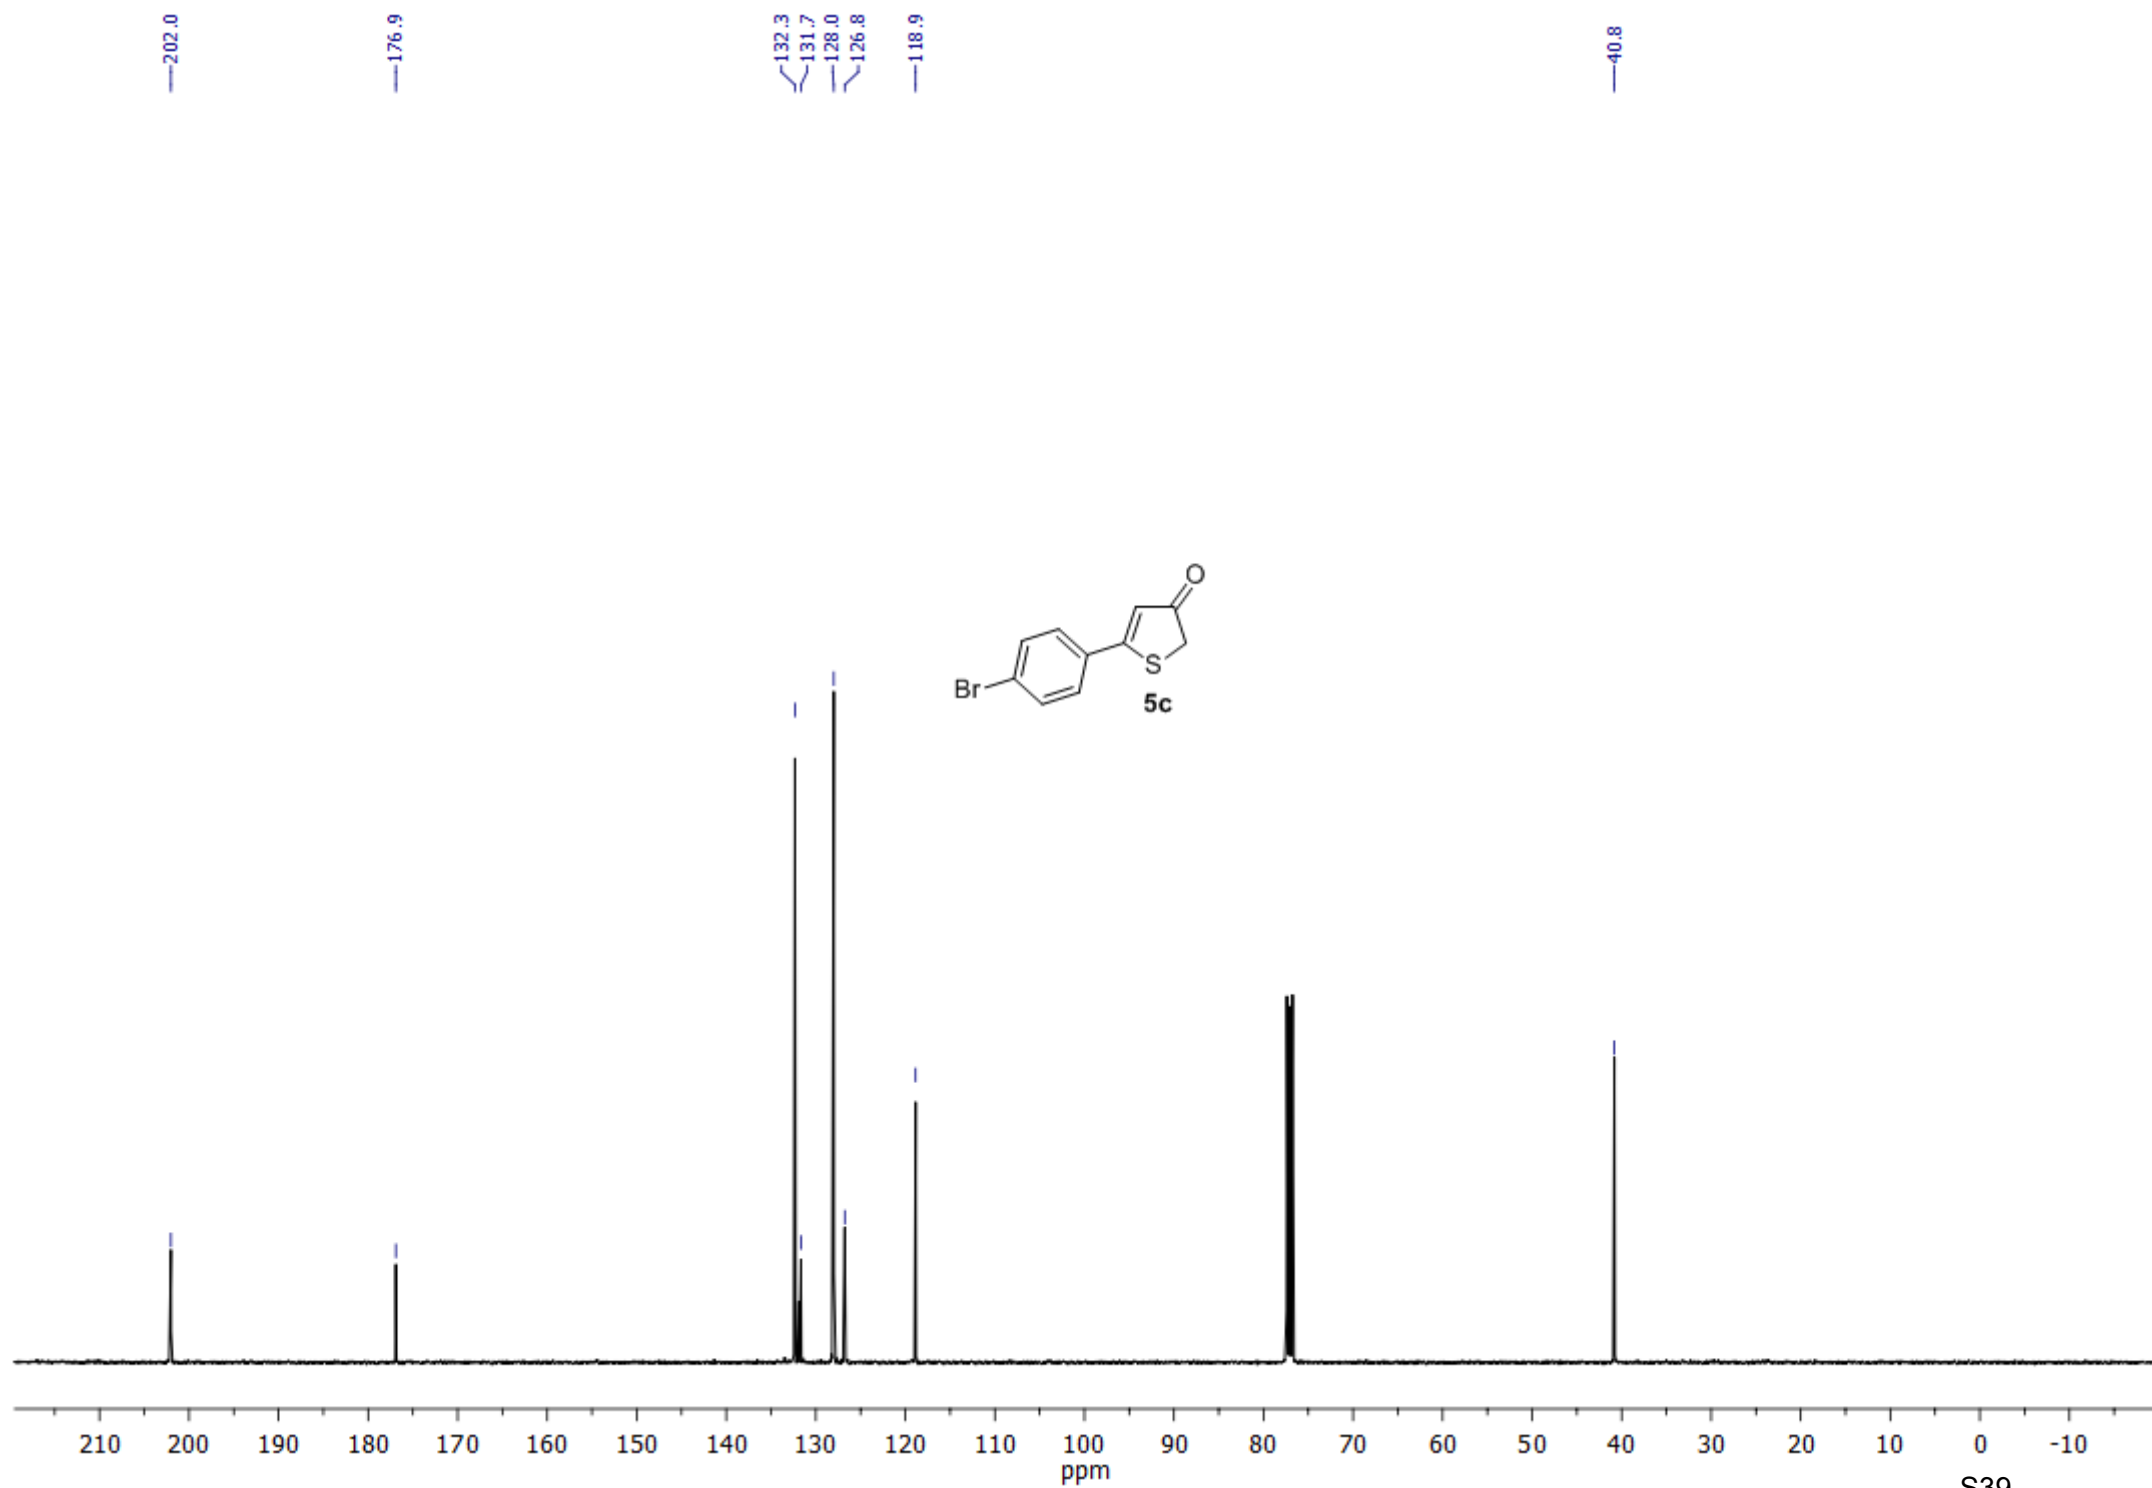

<sup>1</sup>H NMR (solvent: CDCl<sub>3</sub>)

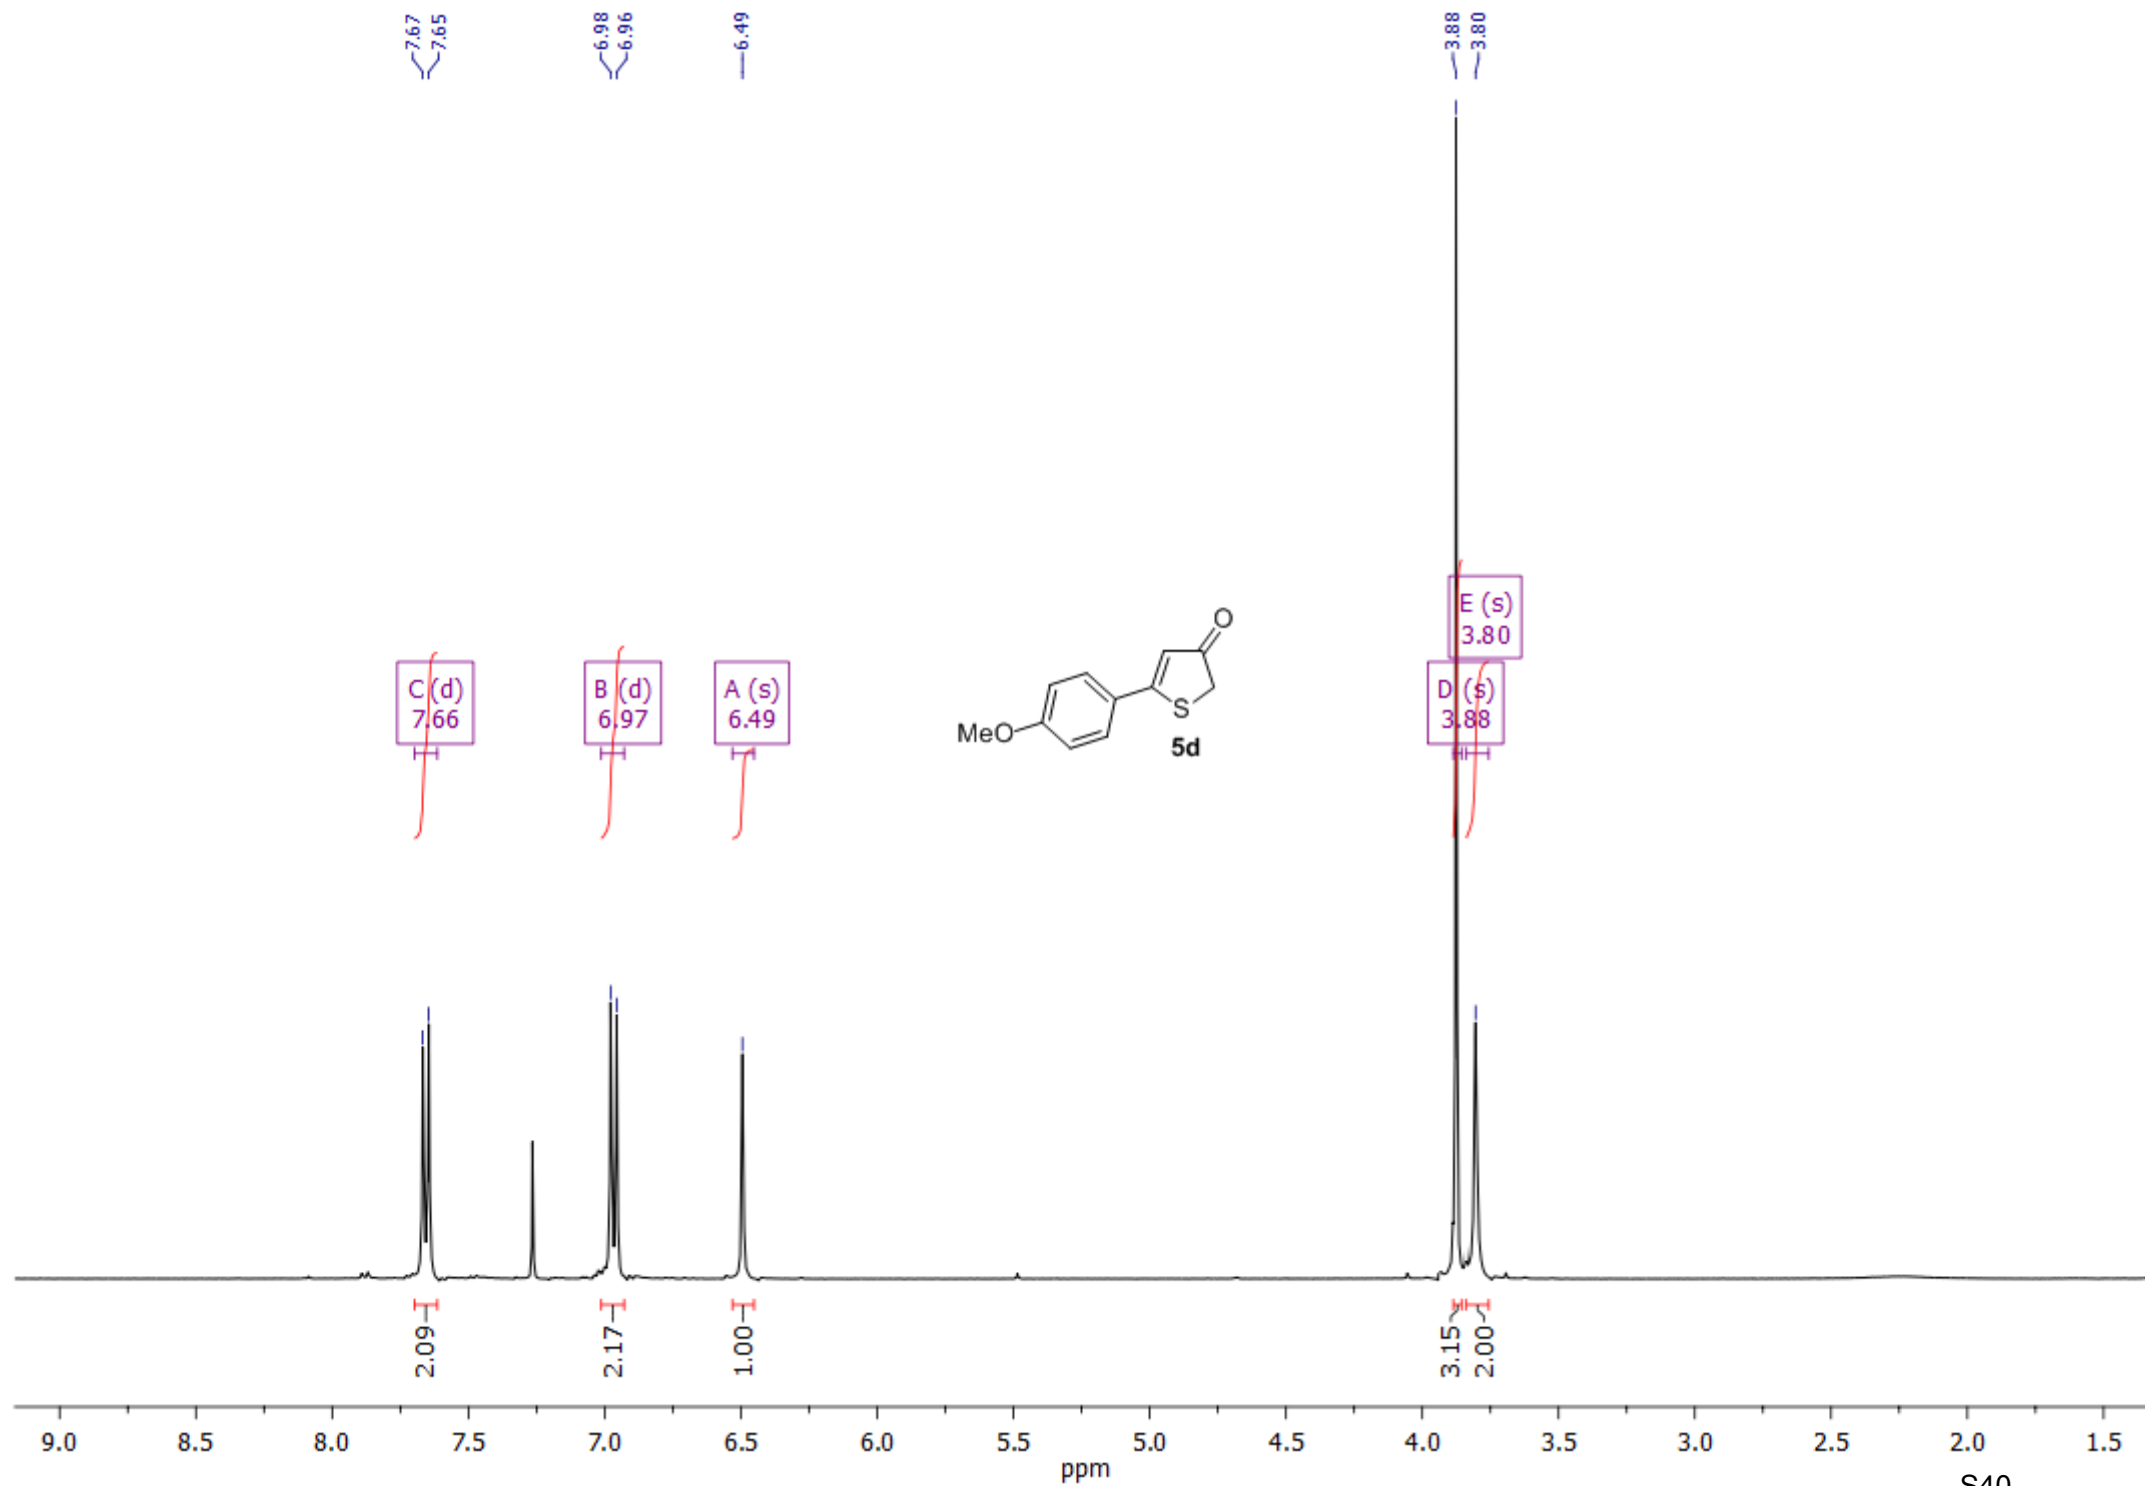



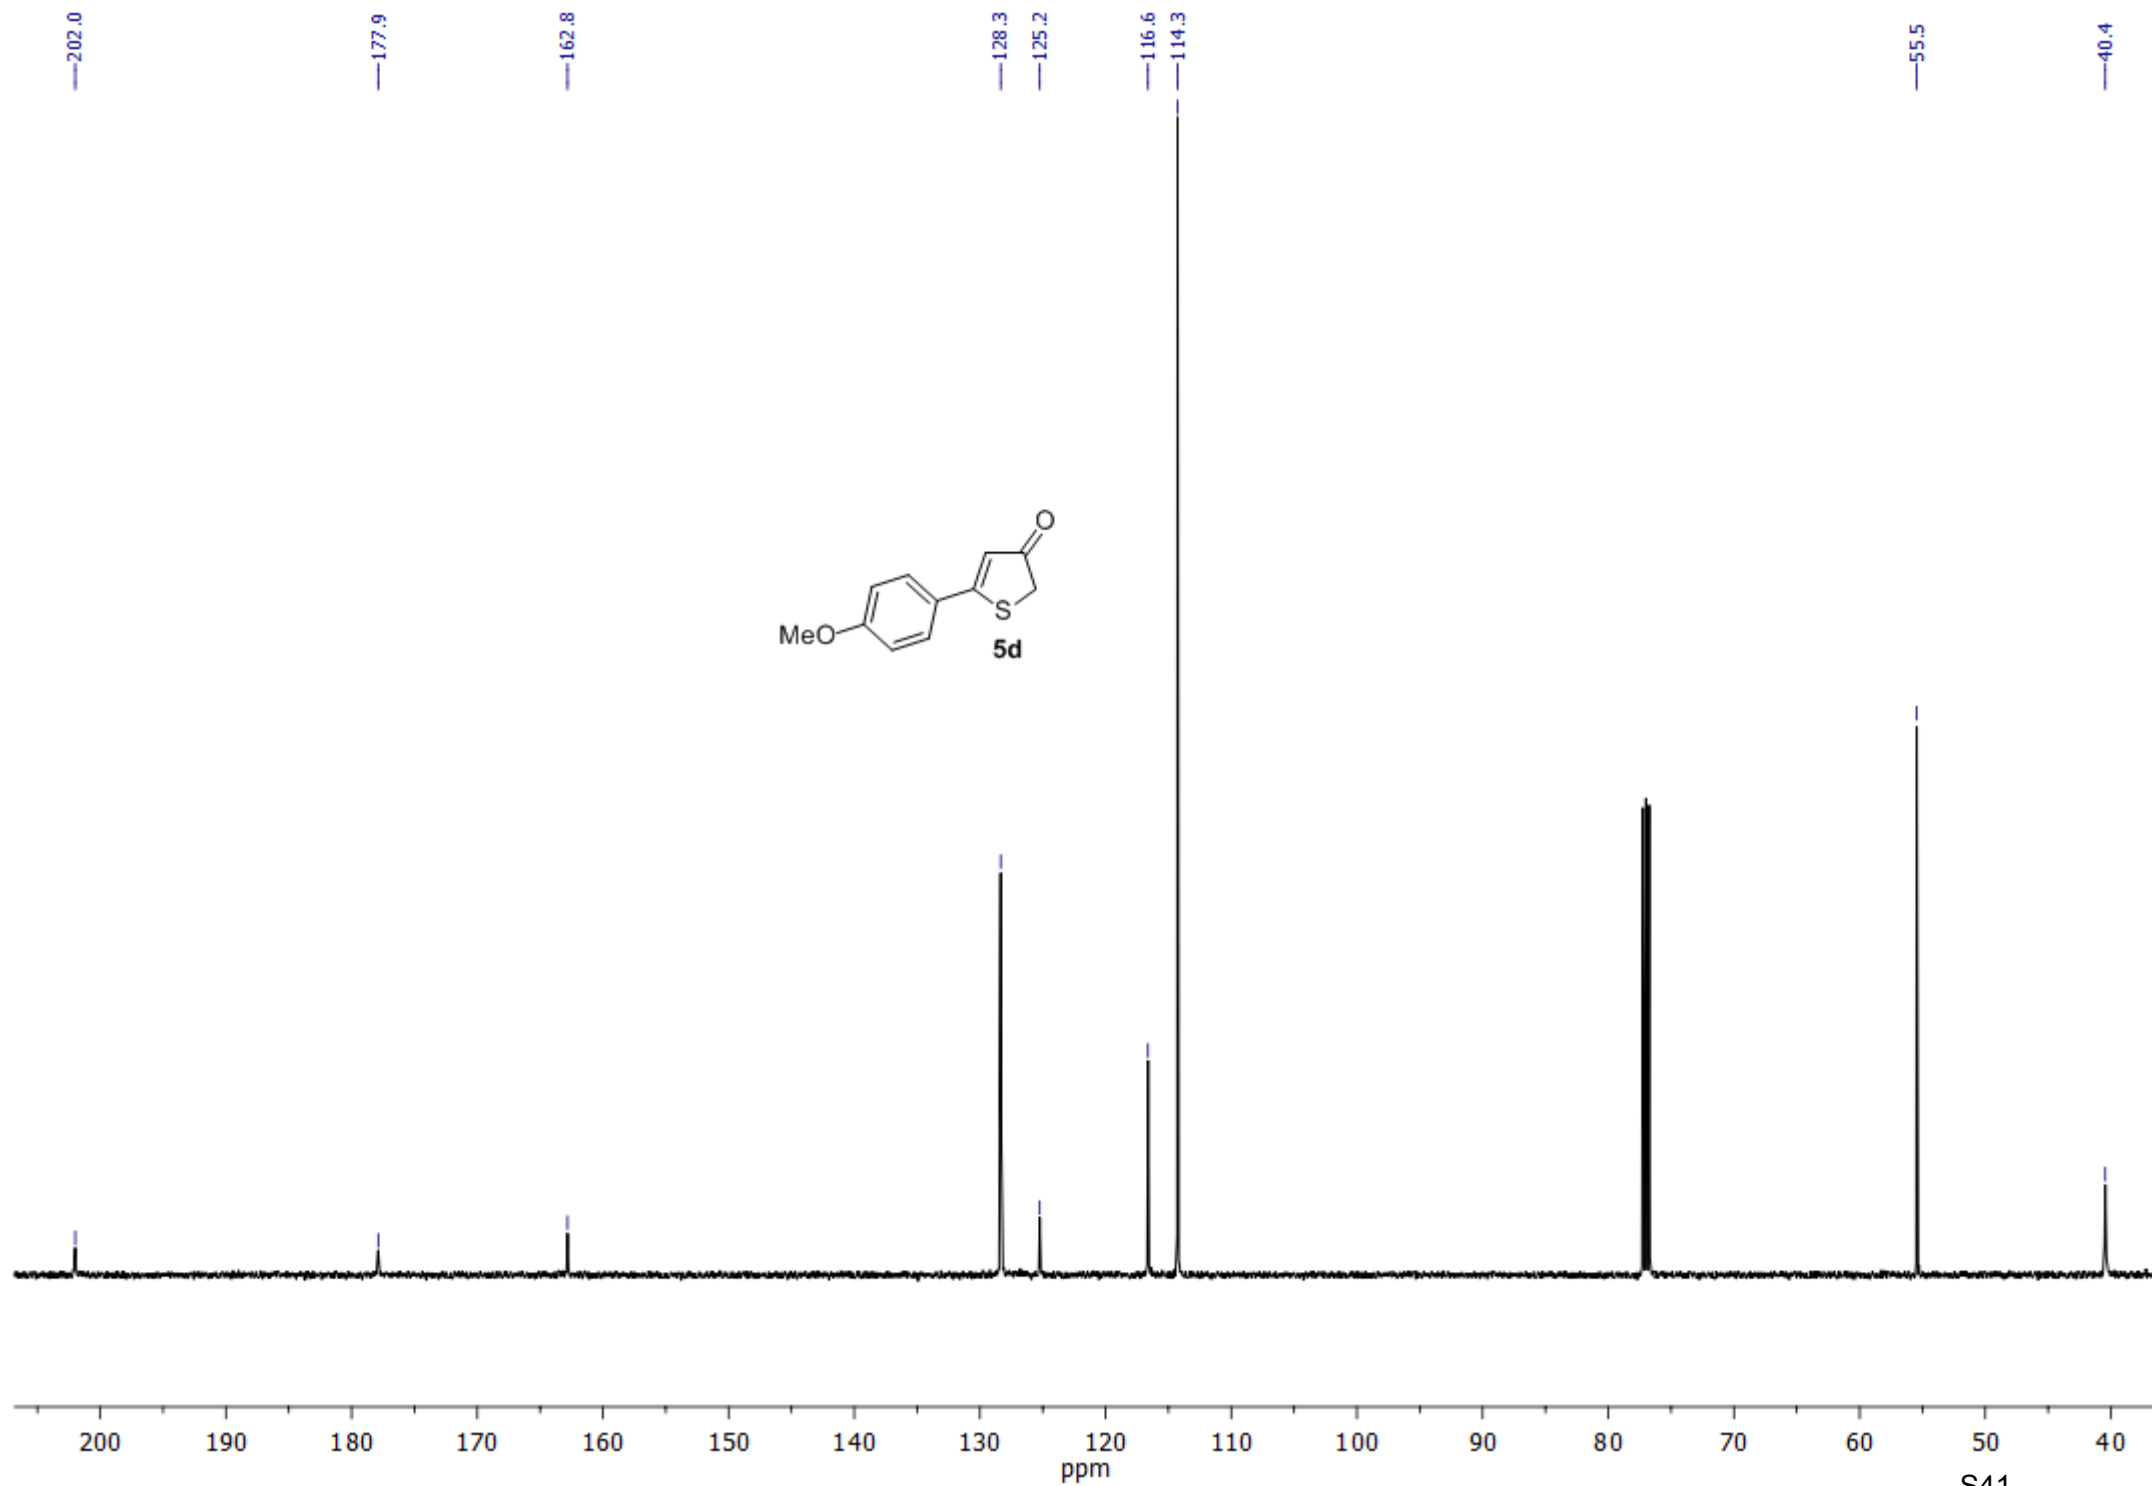

<sup>1</sup>H NMR (solvent: CDCl<sub>3</sub>)

7.66  
7.65  
7.65  
7.63  
7.63  
7.62

6.97  
6.96  
6.95  
6.94  
6.94  
6.93

6.49

4.03  
4.02  
4.00  
3.80

1.84  
1.82  
1.81  
1.79  
1.77

1.47  
1.36  
1.35  
1.34  
1.33  
0.91  
0.89

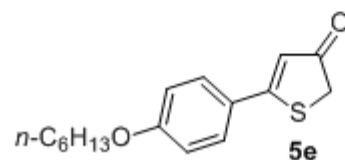

C (m)  
7.64

B (m)  
6.95

A (s)  
6.49

D (t)  
4.02

E (s)  
3.80

F (m)  
1.81

G (m)  
1.47

H (m)  
1.35

I (t)  
0.91

2.03

2.05

1.00

2.12

1.94

2.20

2.18

4.36

3.20

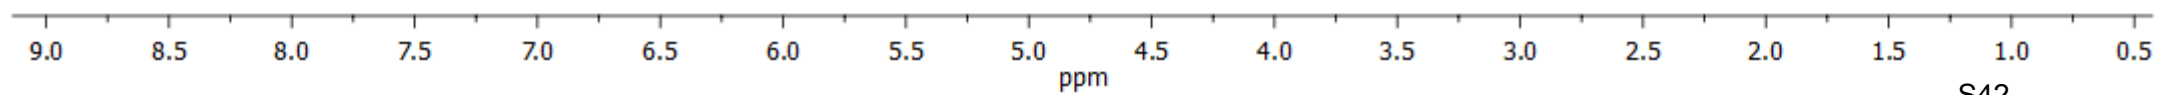

**$^{13}\text{C}$  NMR** (solvent:  $\text{CDCl}_3$ )

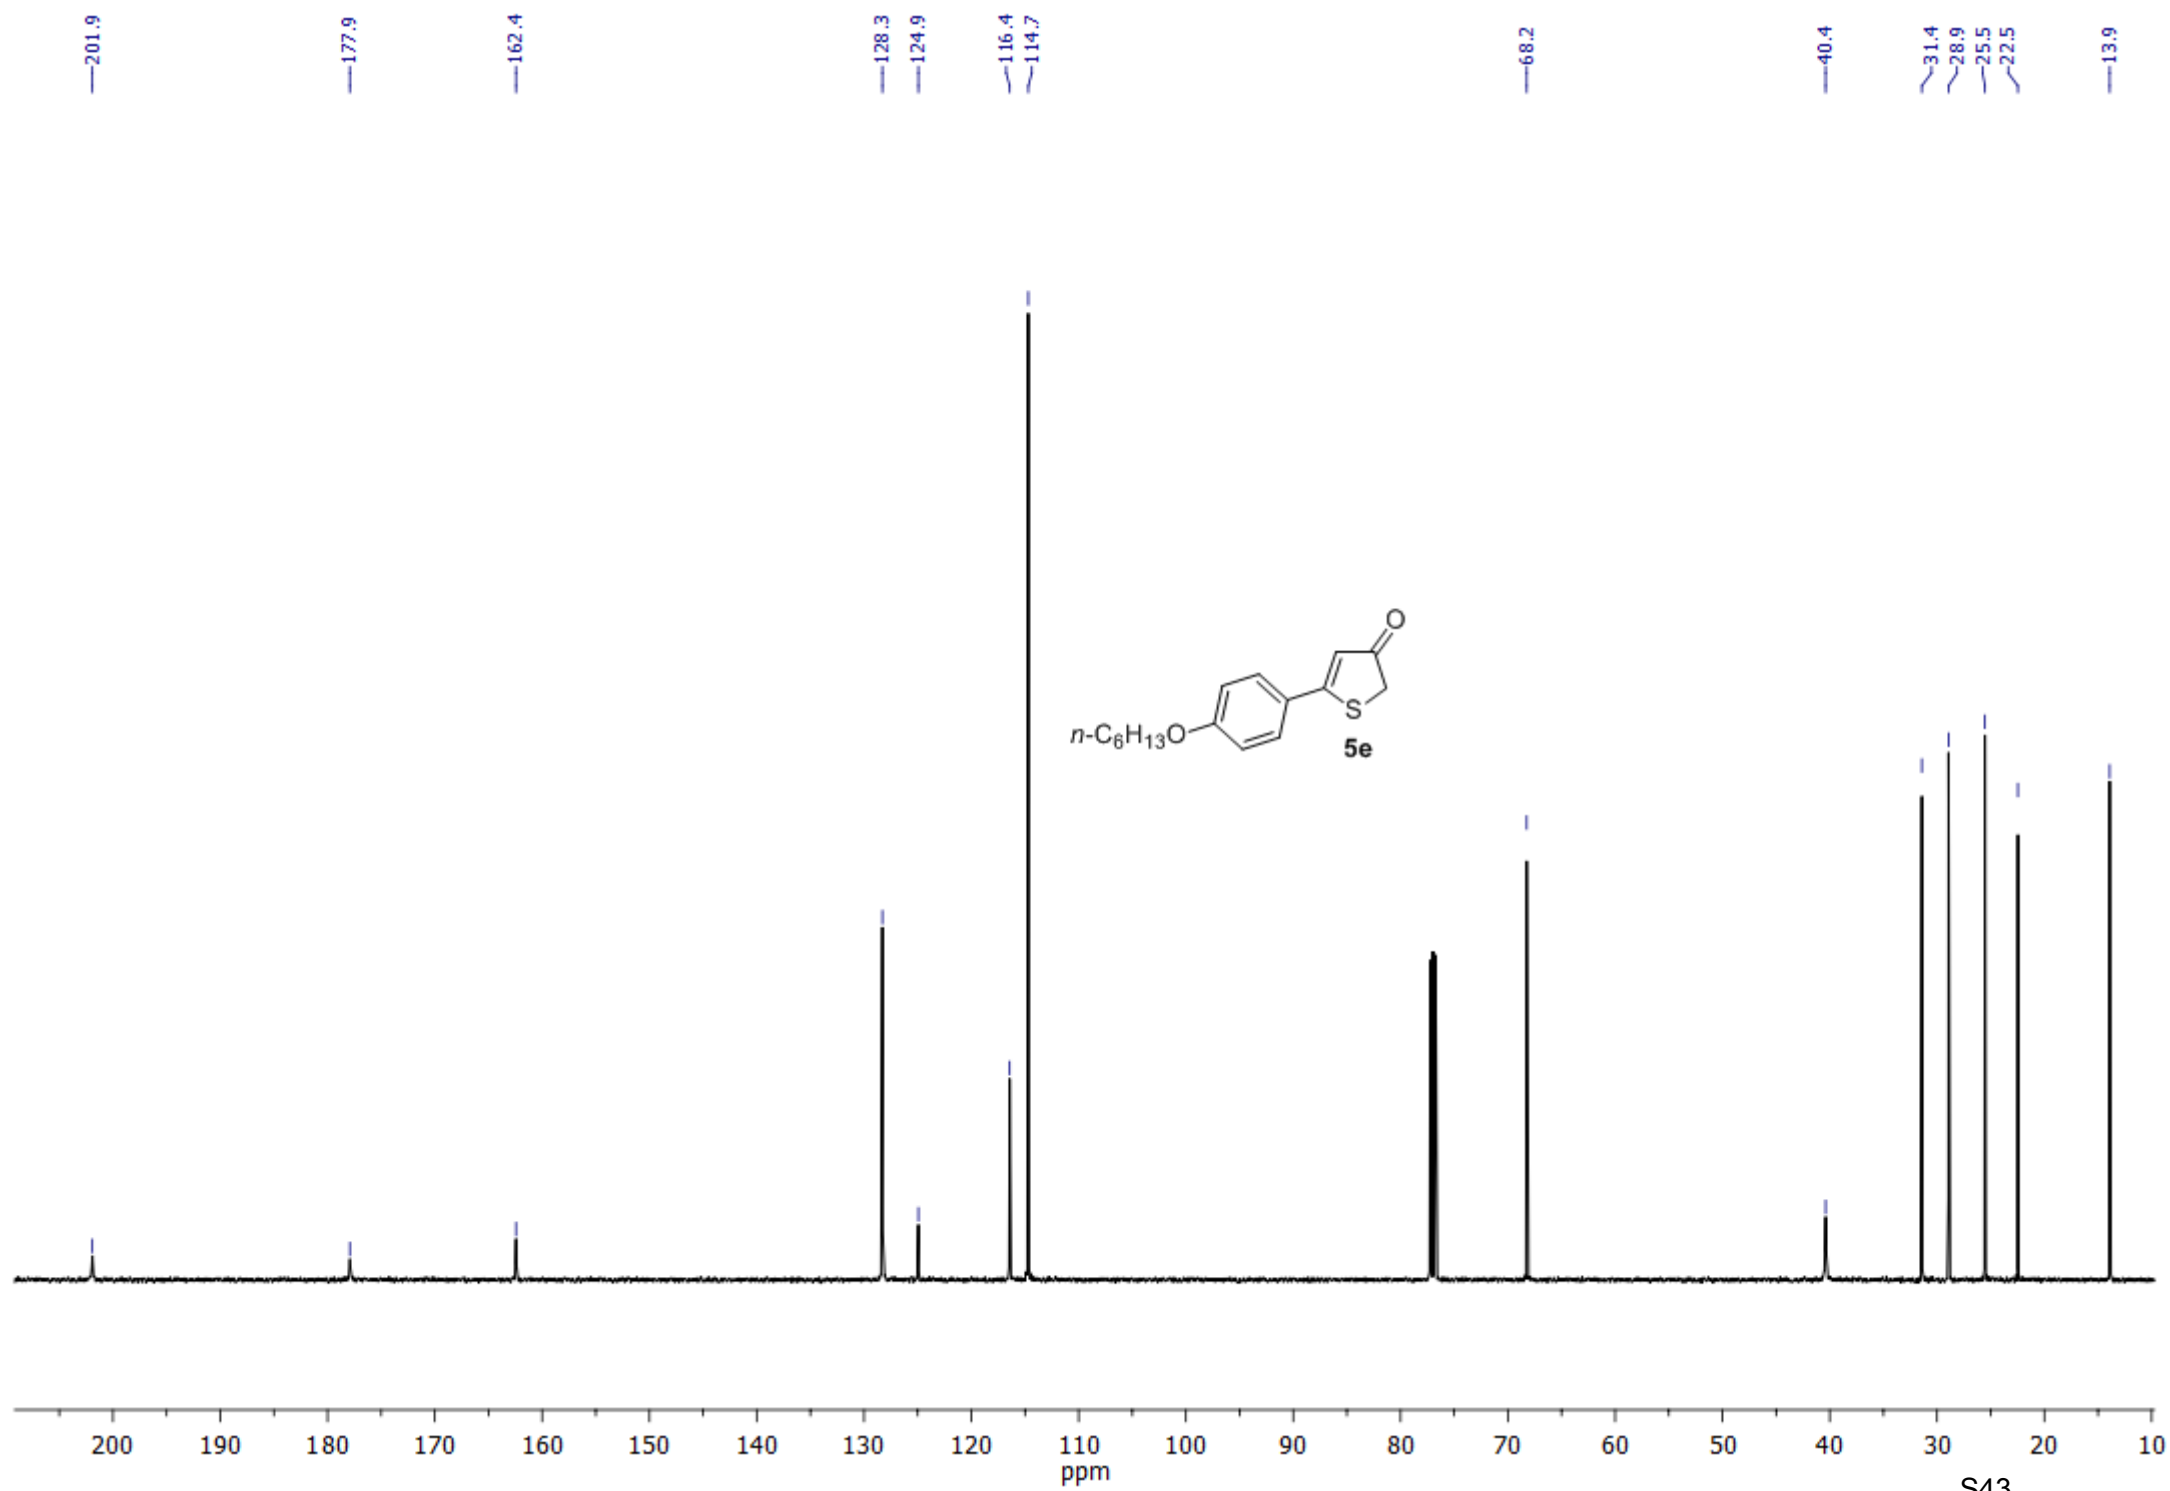

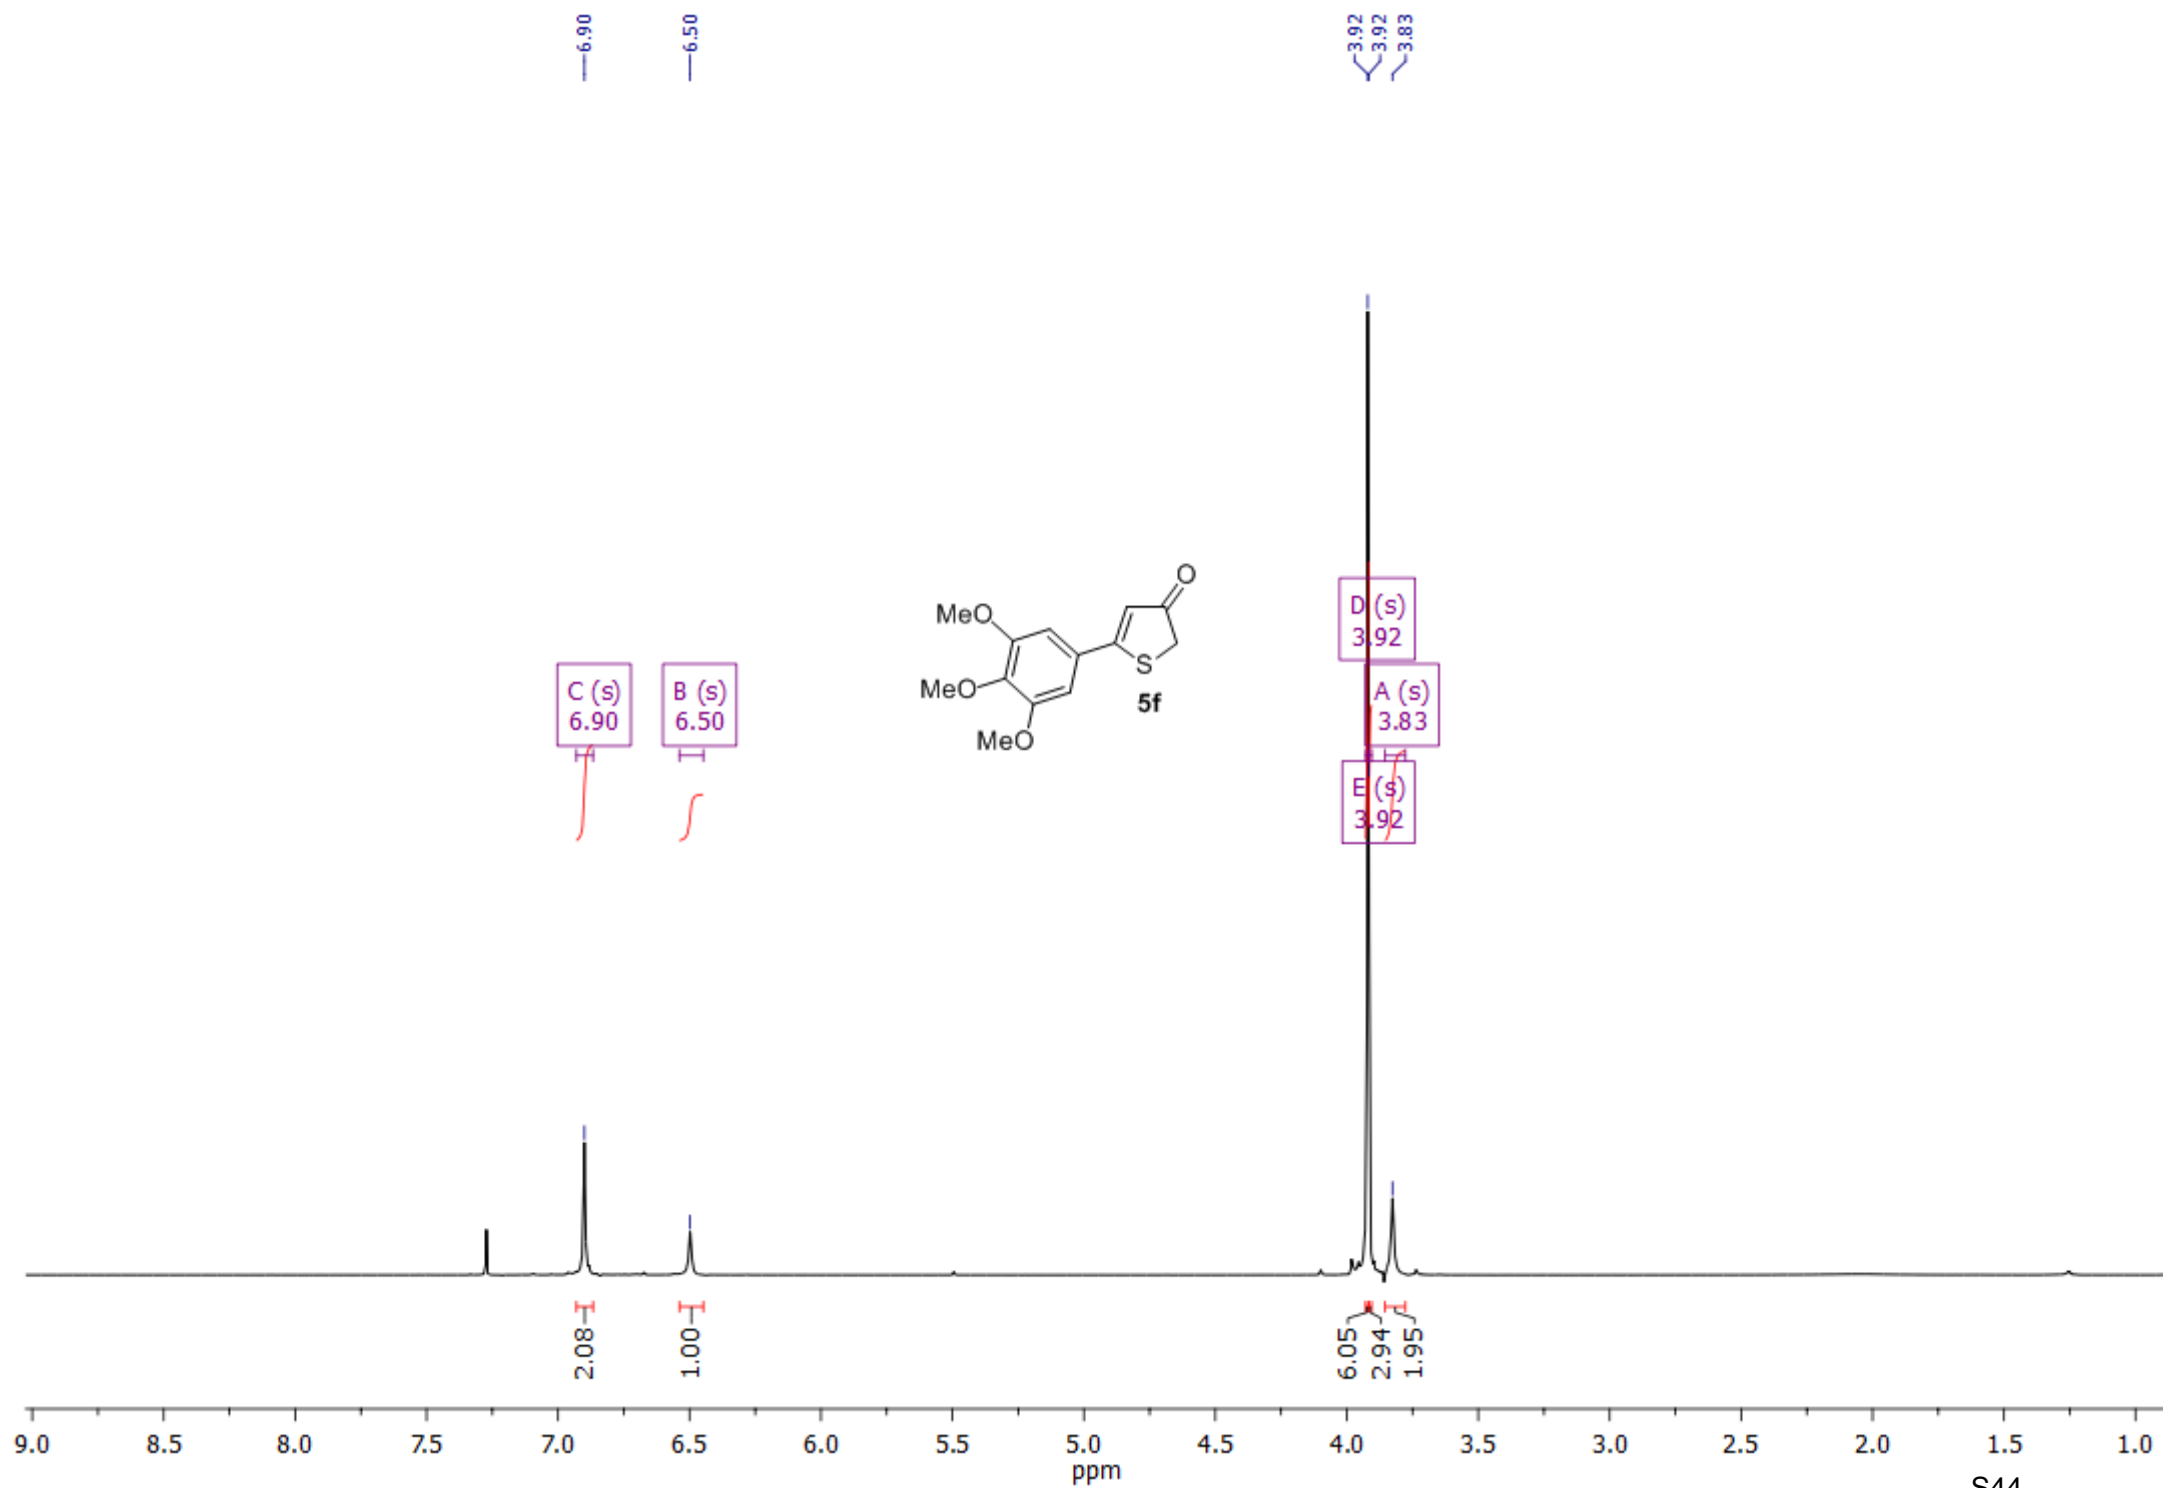

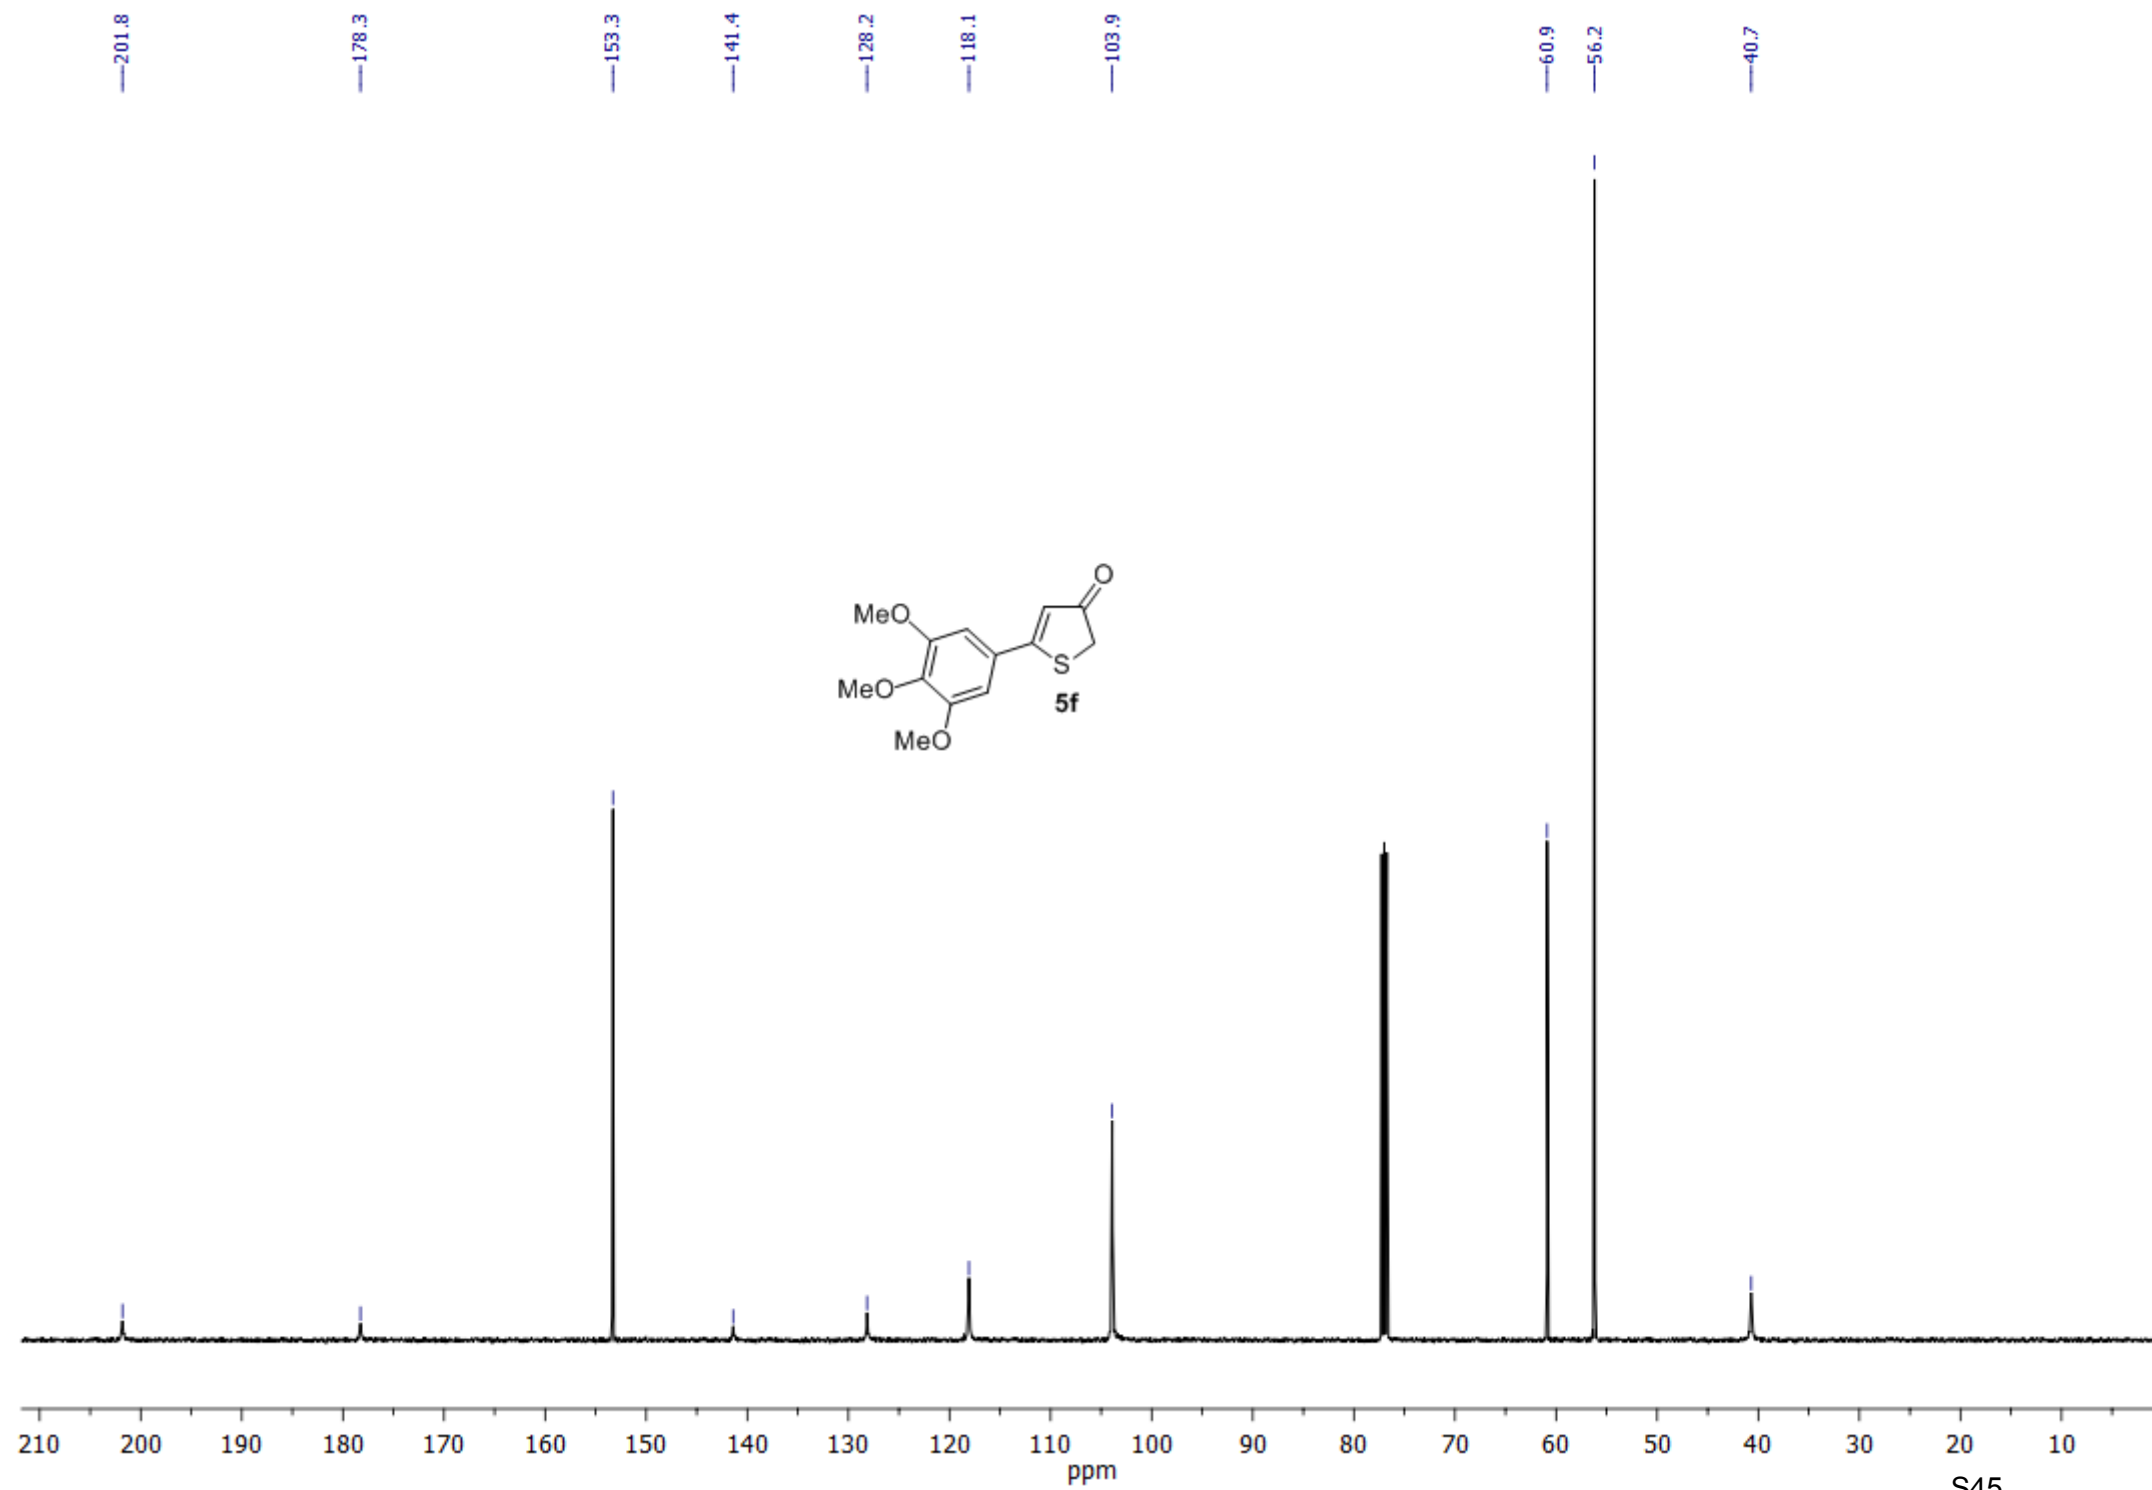

<sup>1</sup>H NMR (solvent: DMSO-*d*<sub>6</sub>), enol (3-hydroxythiophene) form of compound **5g**

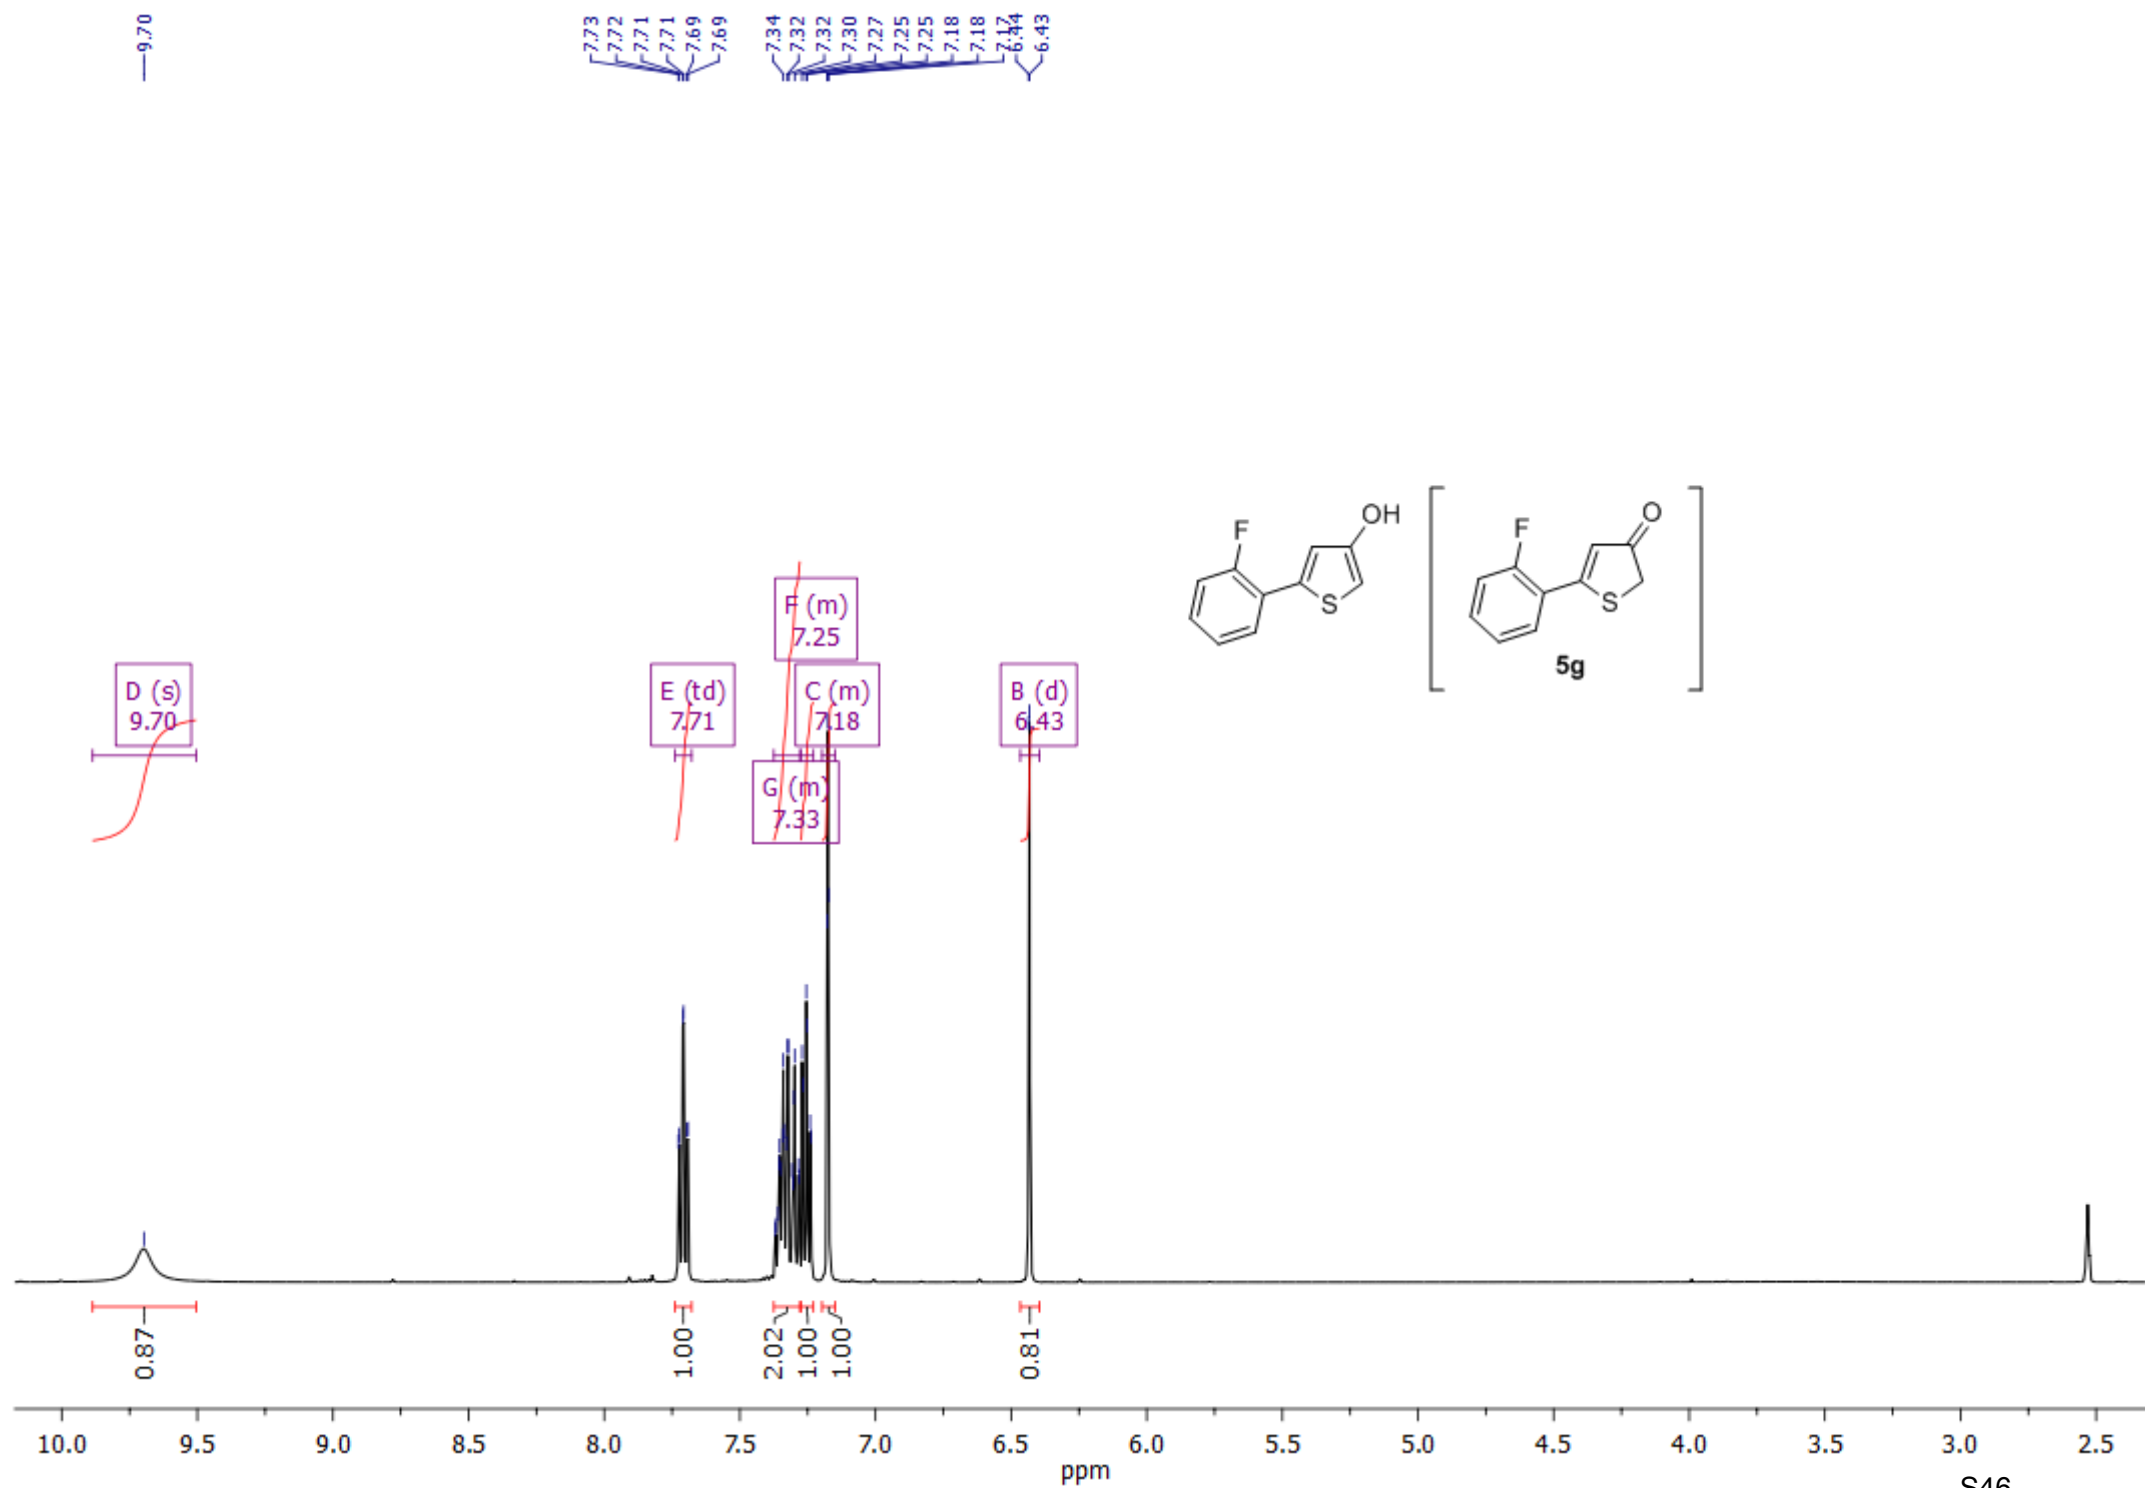

<sup>19</sup>F NMR (solvent: DMSO-*d*<sub>6</sub>), enol (3-hydroxythiophene) form of compound **5g**

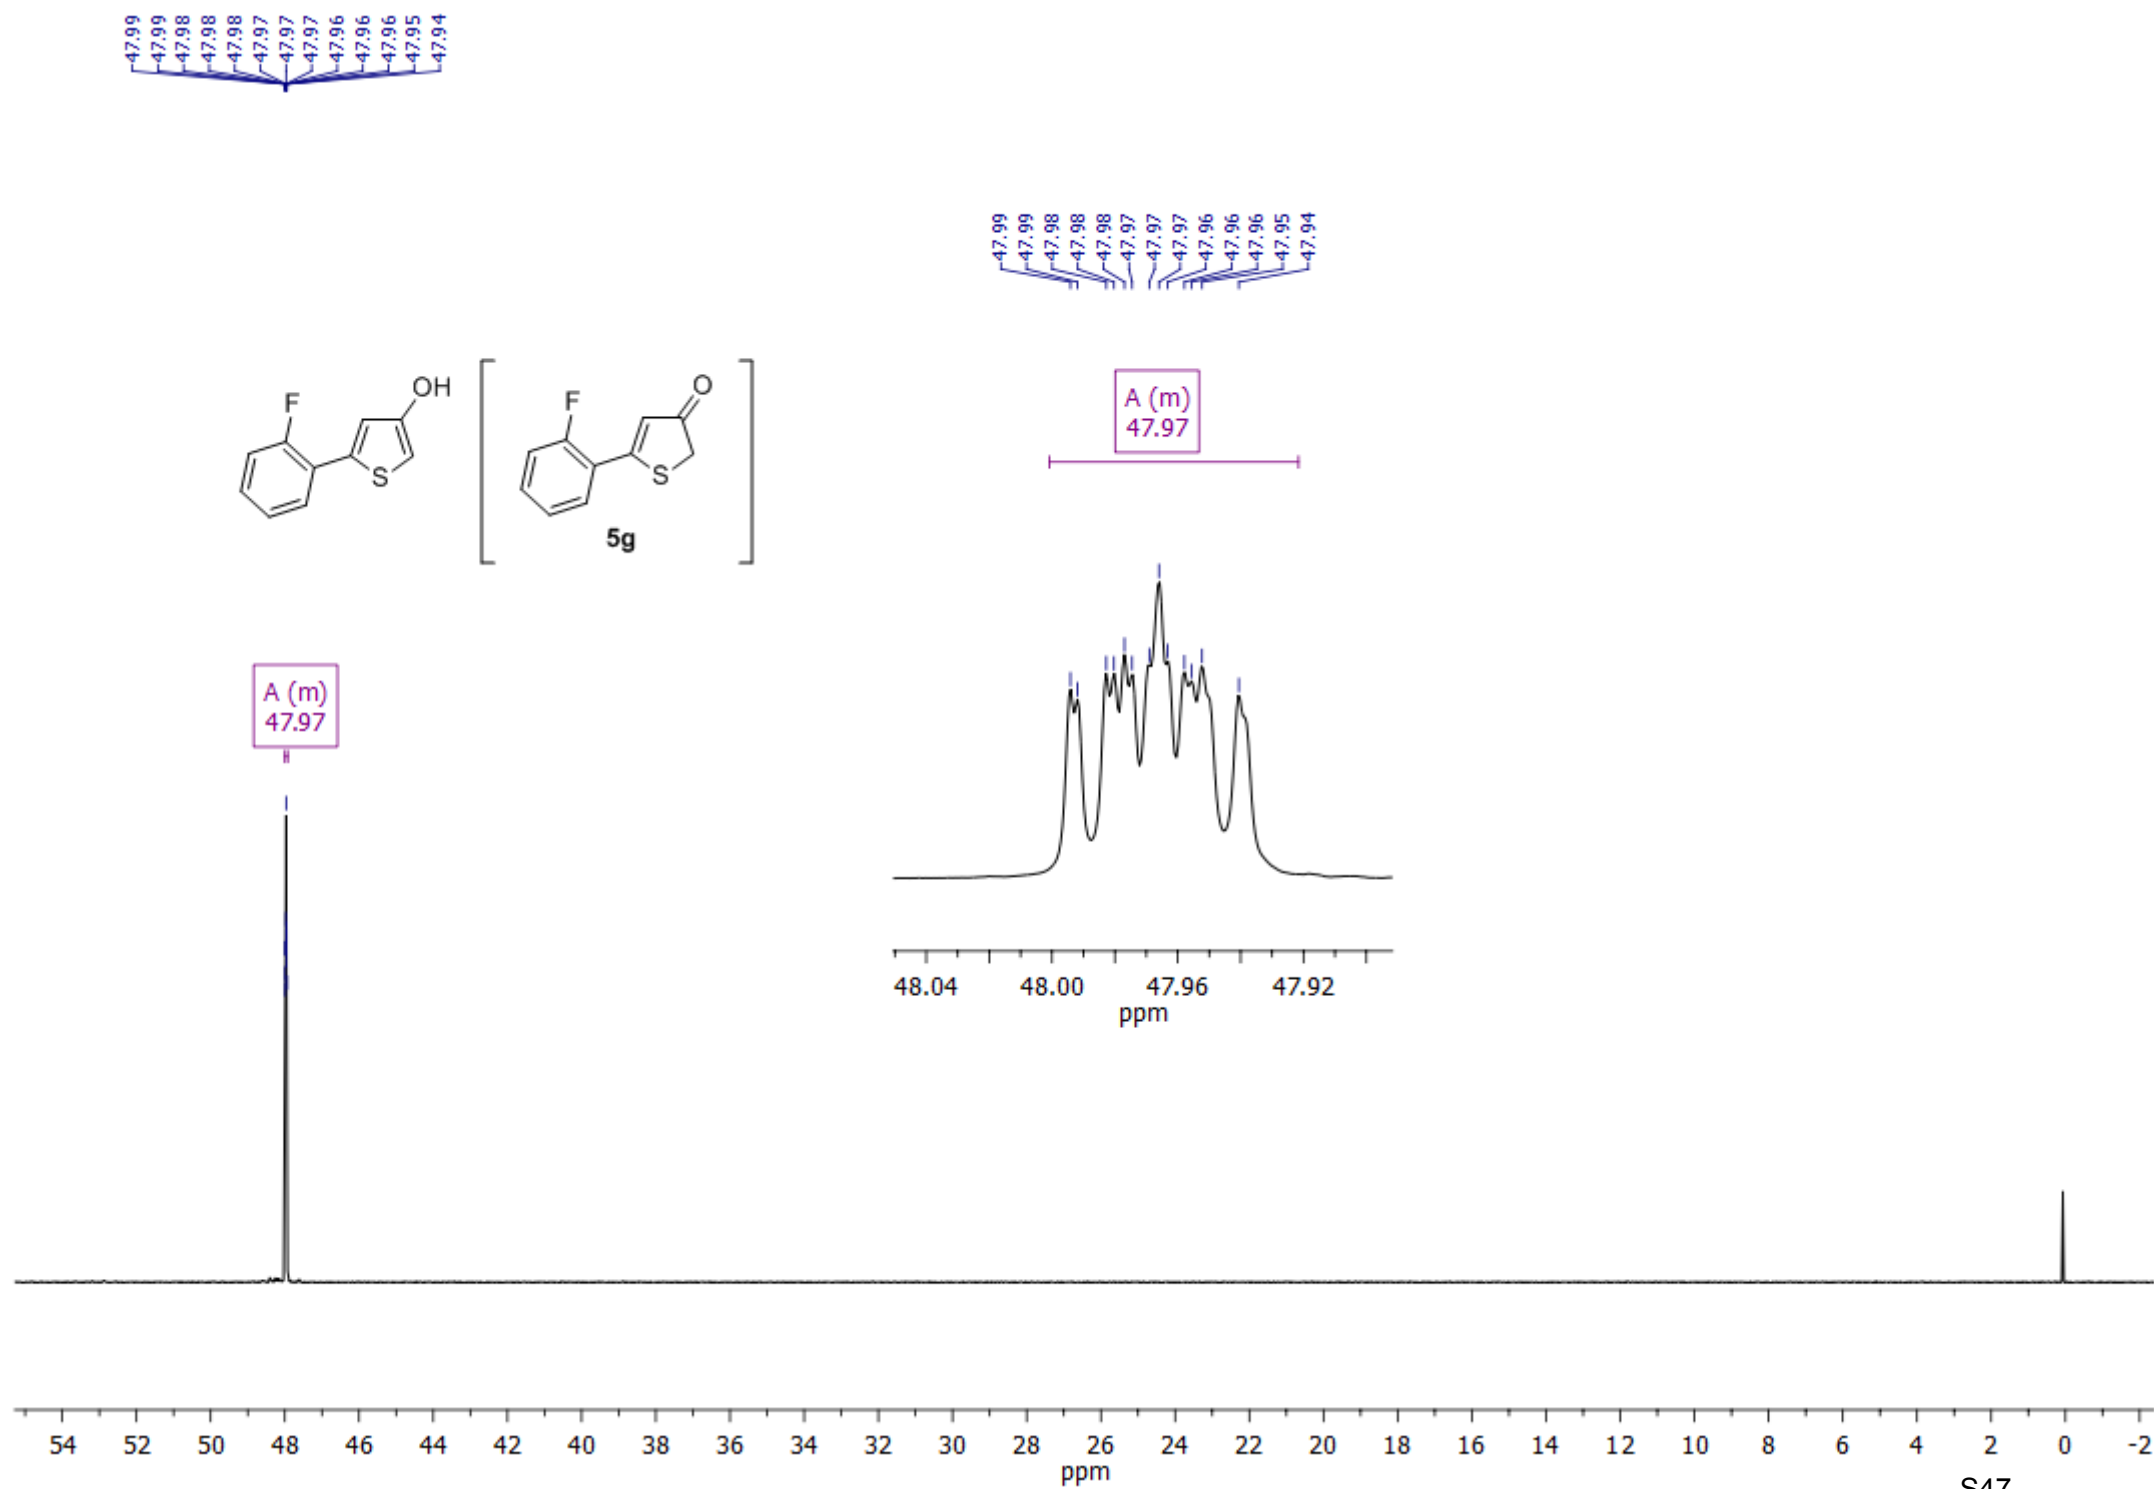

<sup>13</sup>C NMR (solvent: DMSO-*d*<sub>6</sub>), enol (3-hydroxythiophene) form of compound **5g**

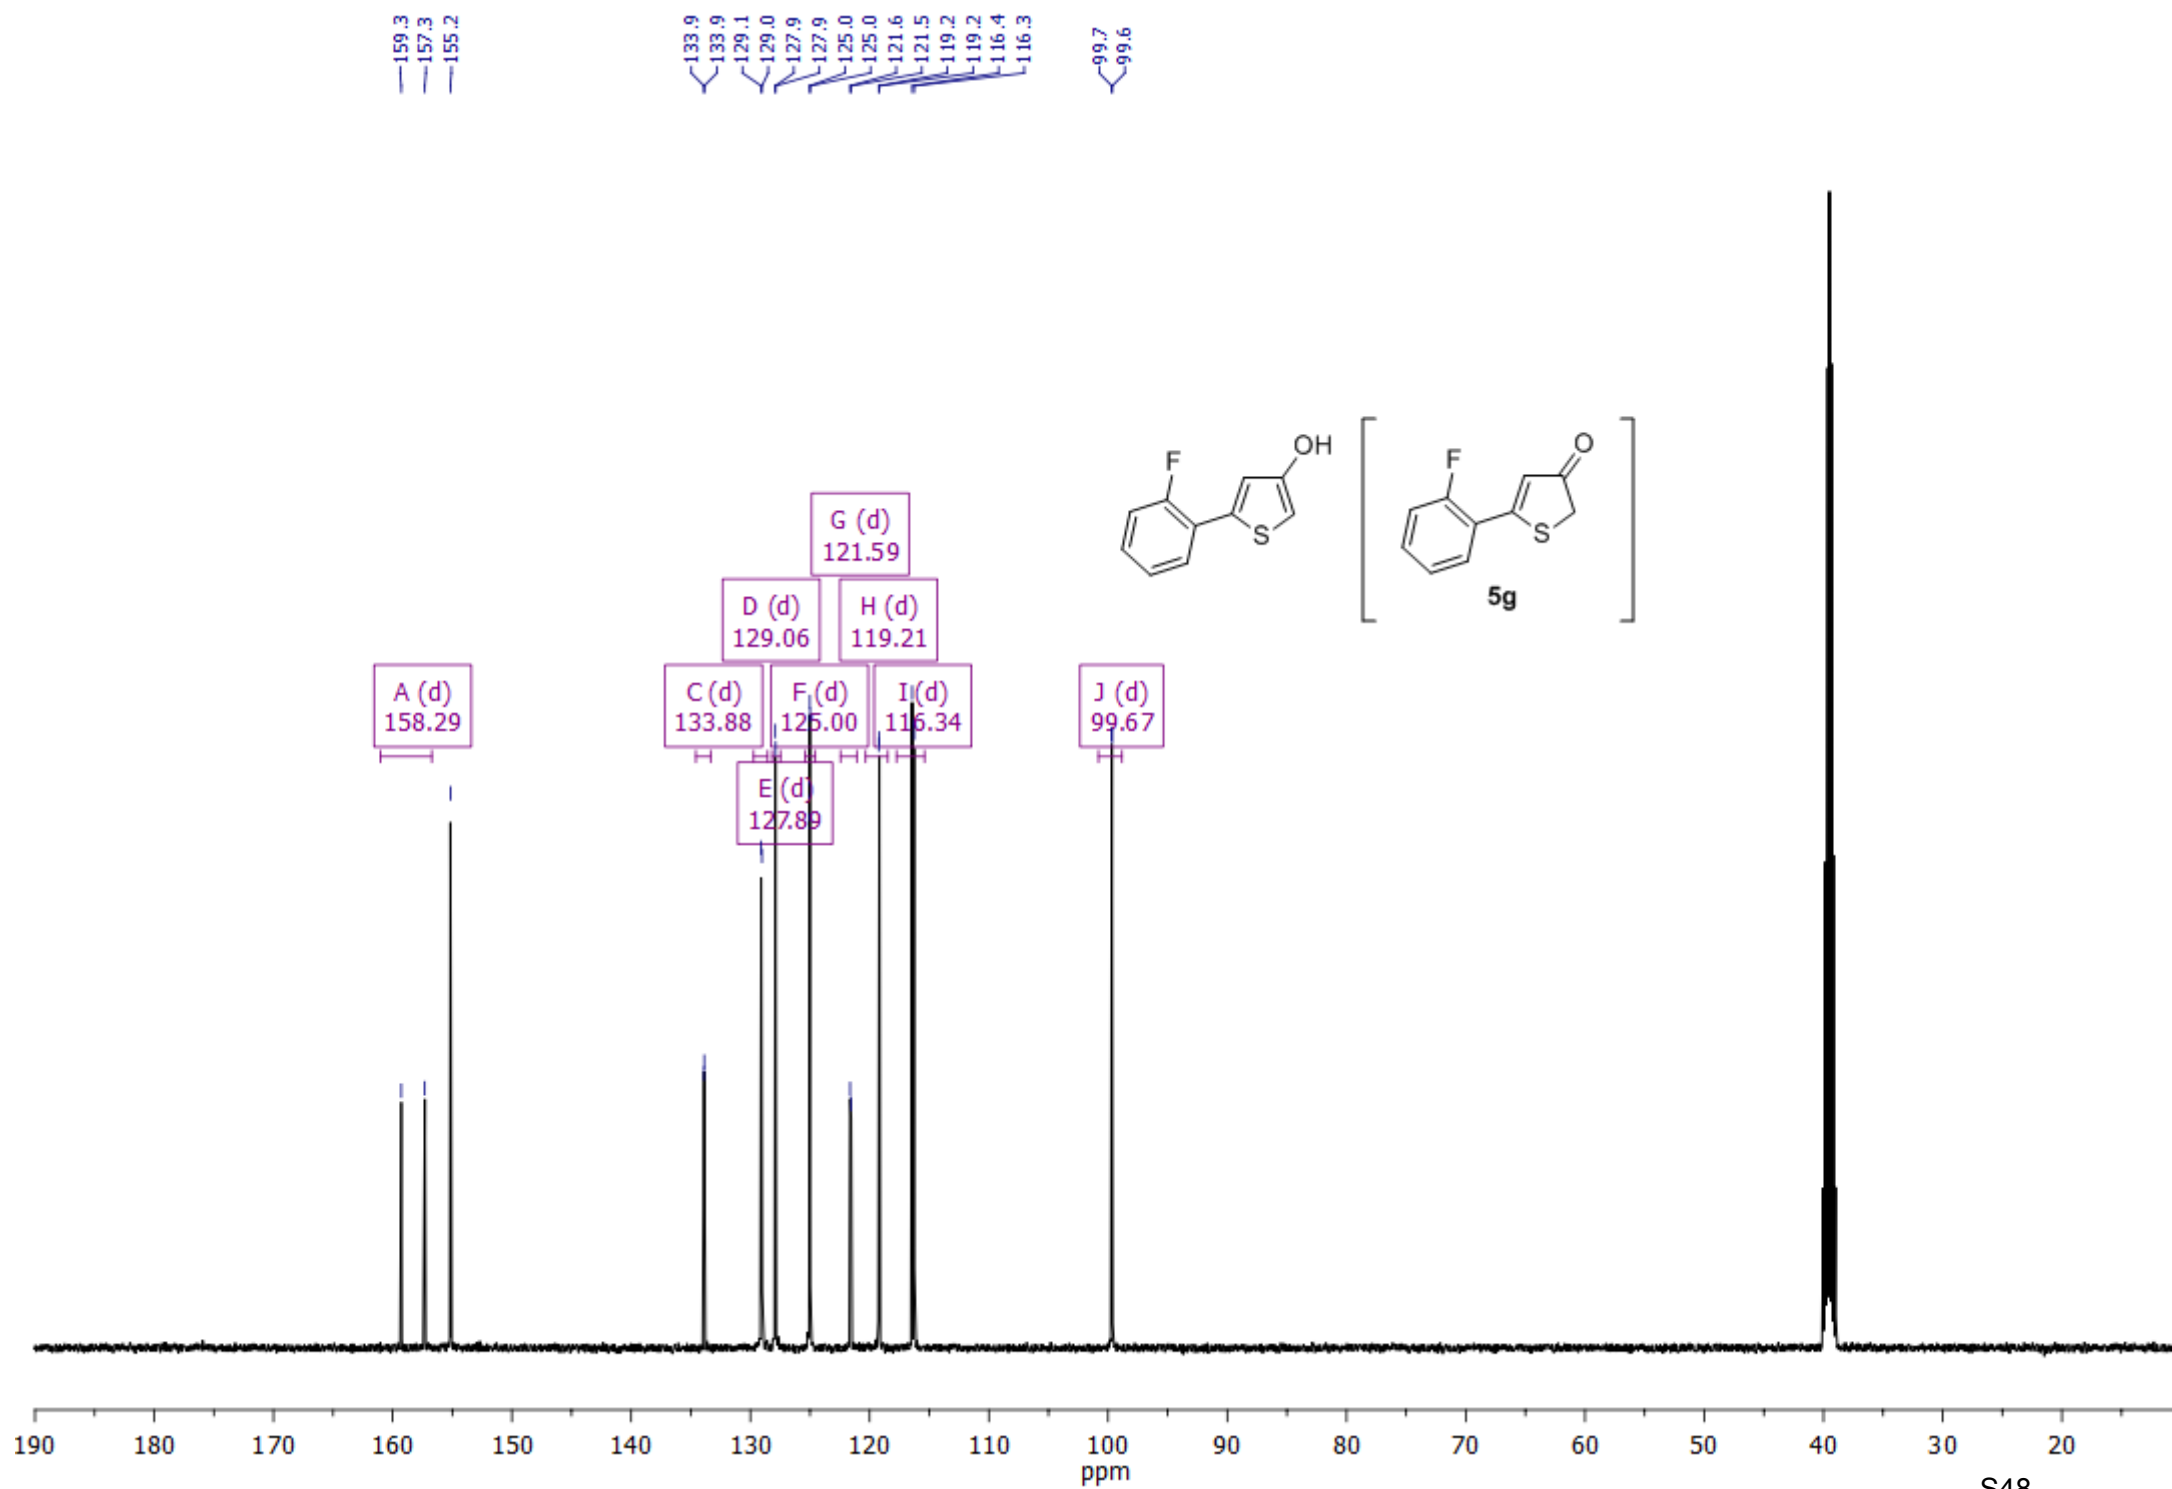



<sup>1</sup>H NMR (solvent: DMSO-*d*<sub>6</sub>), enol (3-hydroxythiophene) form of compound **5h**

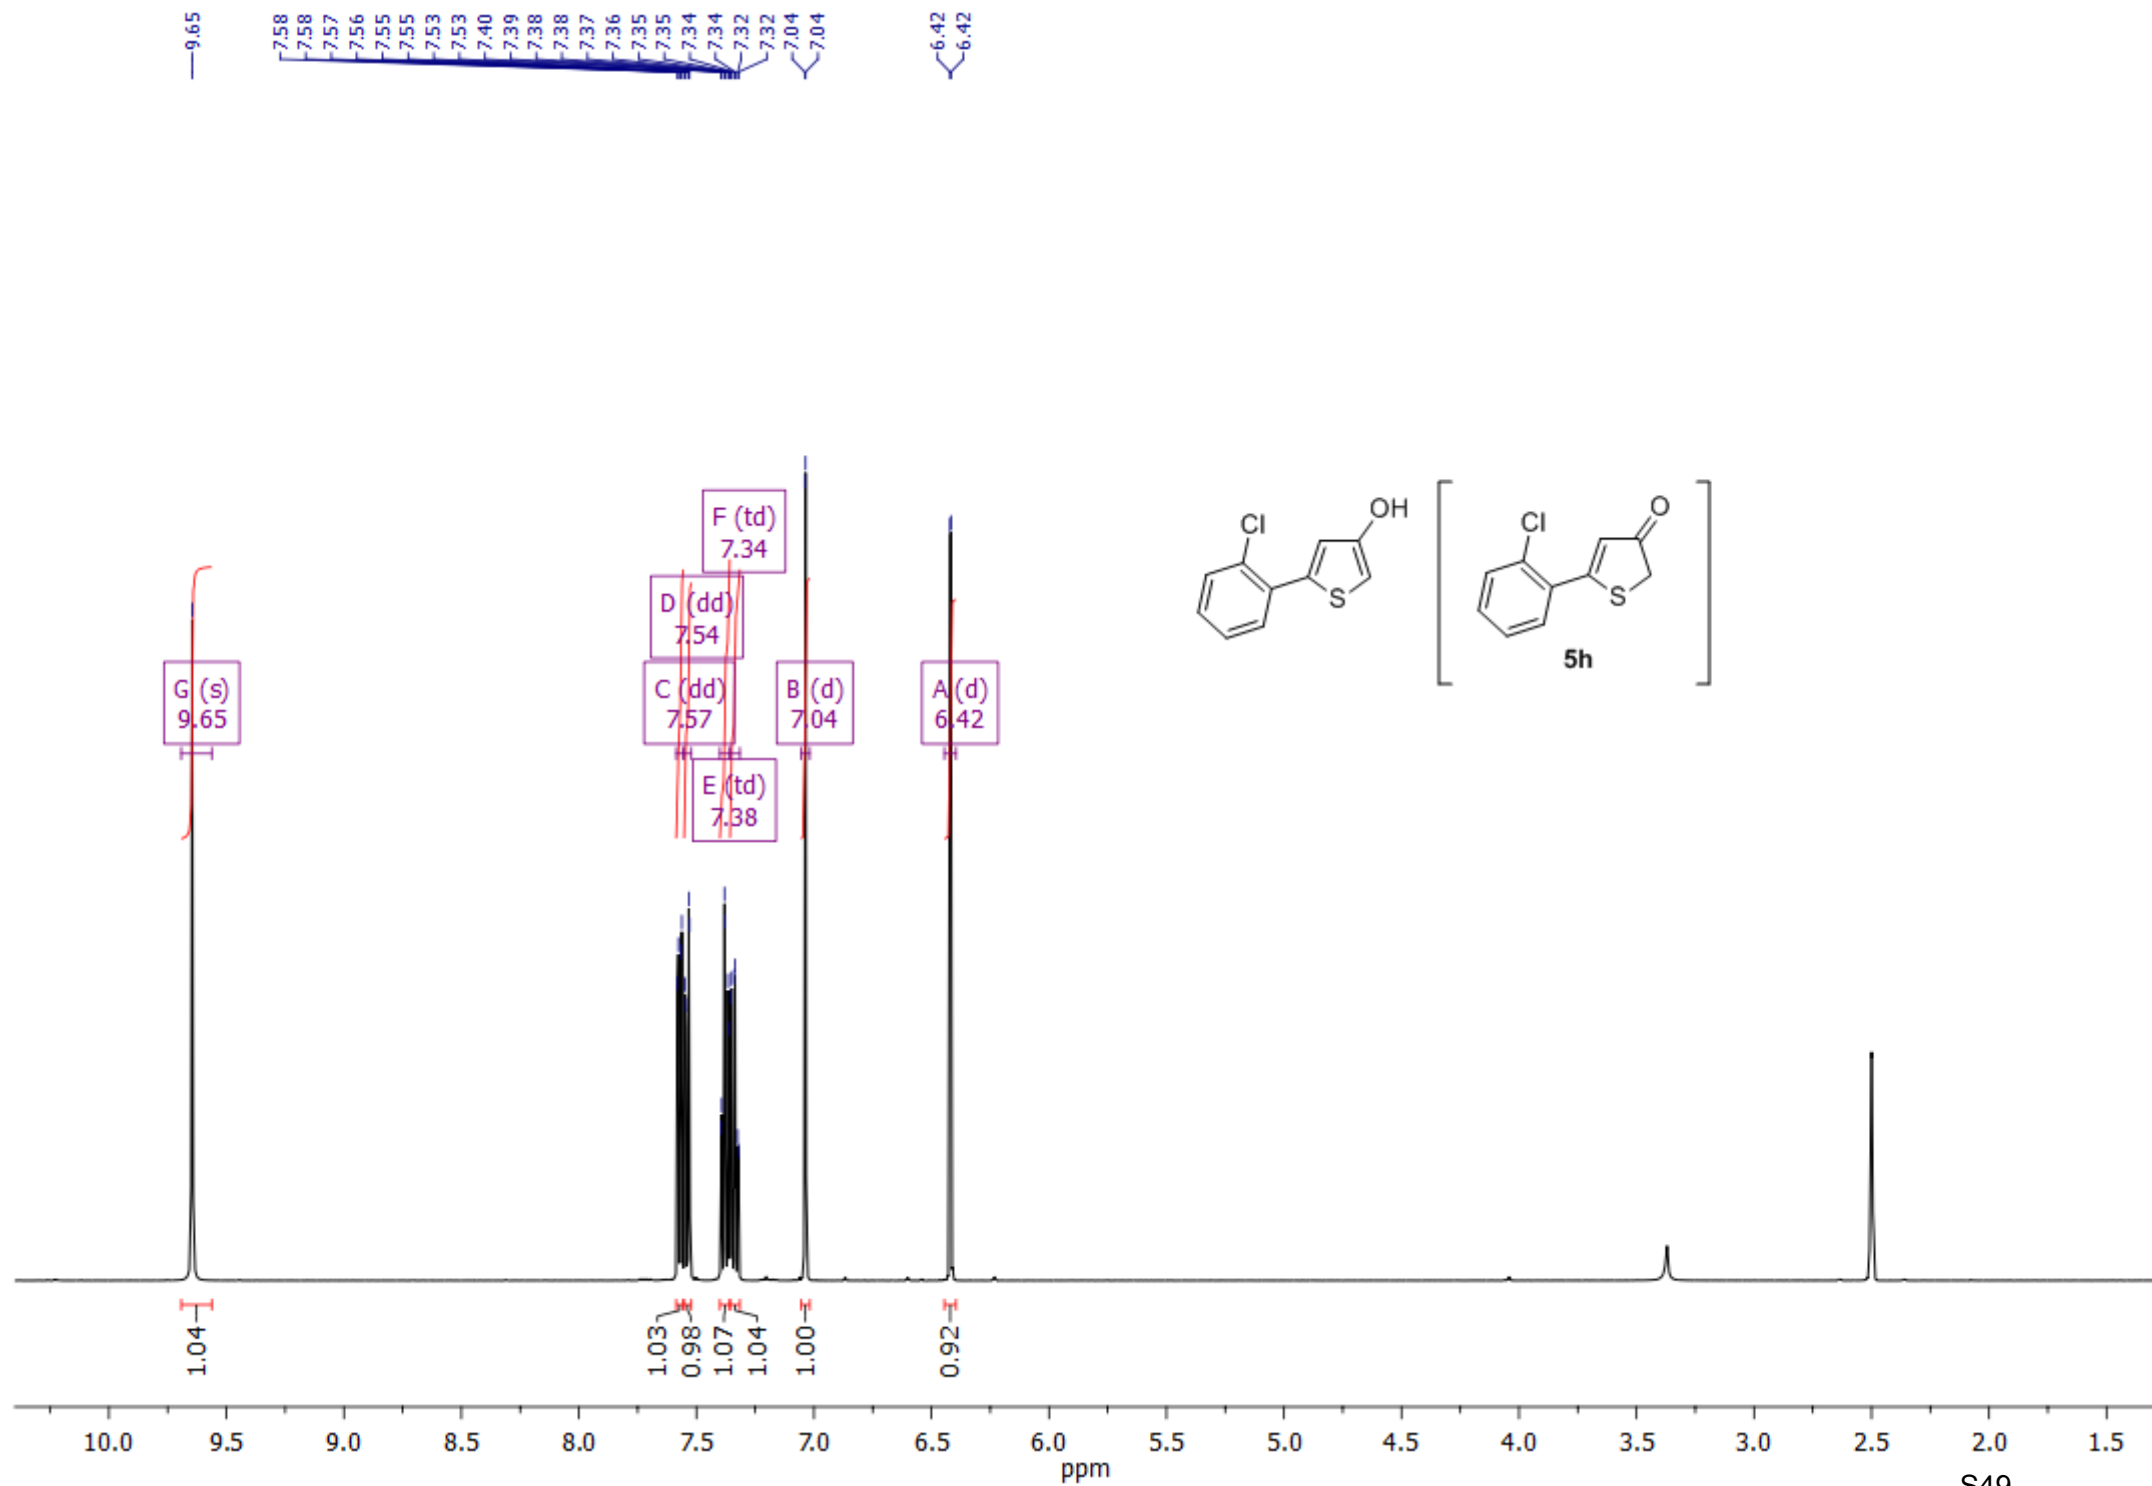

$^{13}\text{C}$  NMR (solvent:  $\text{DMSO-}d_6$ ), enol (3-hydroxythiophene) form of compound **5h**

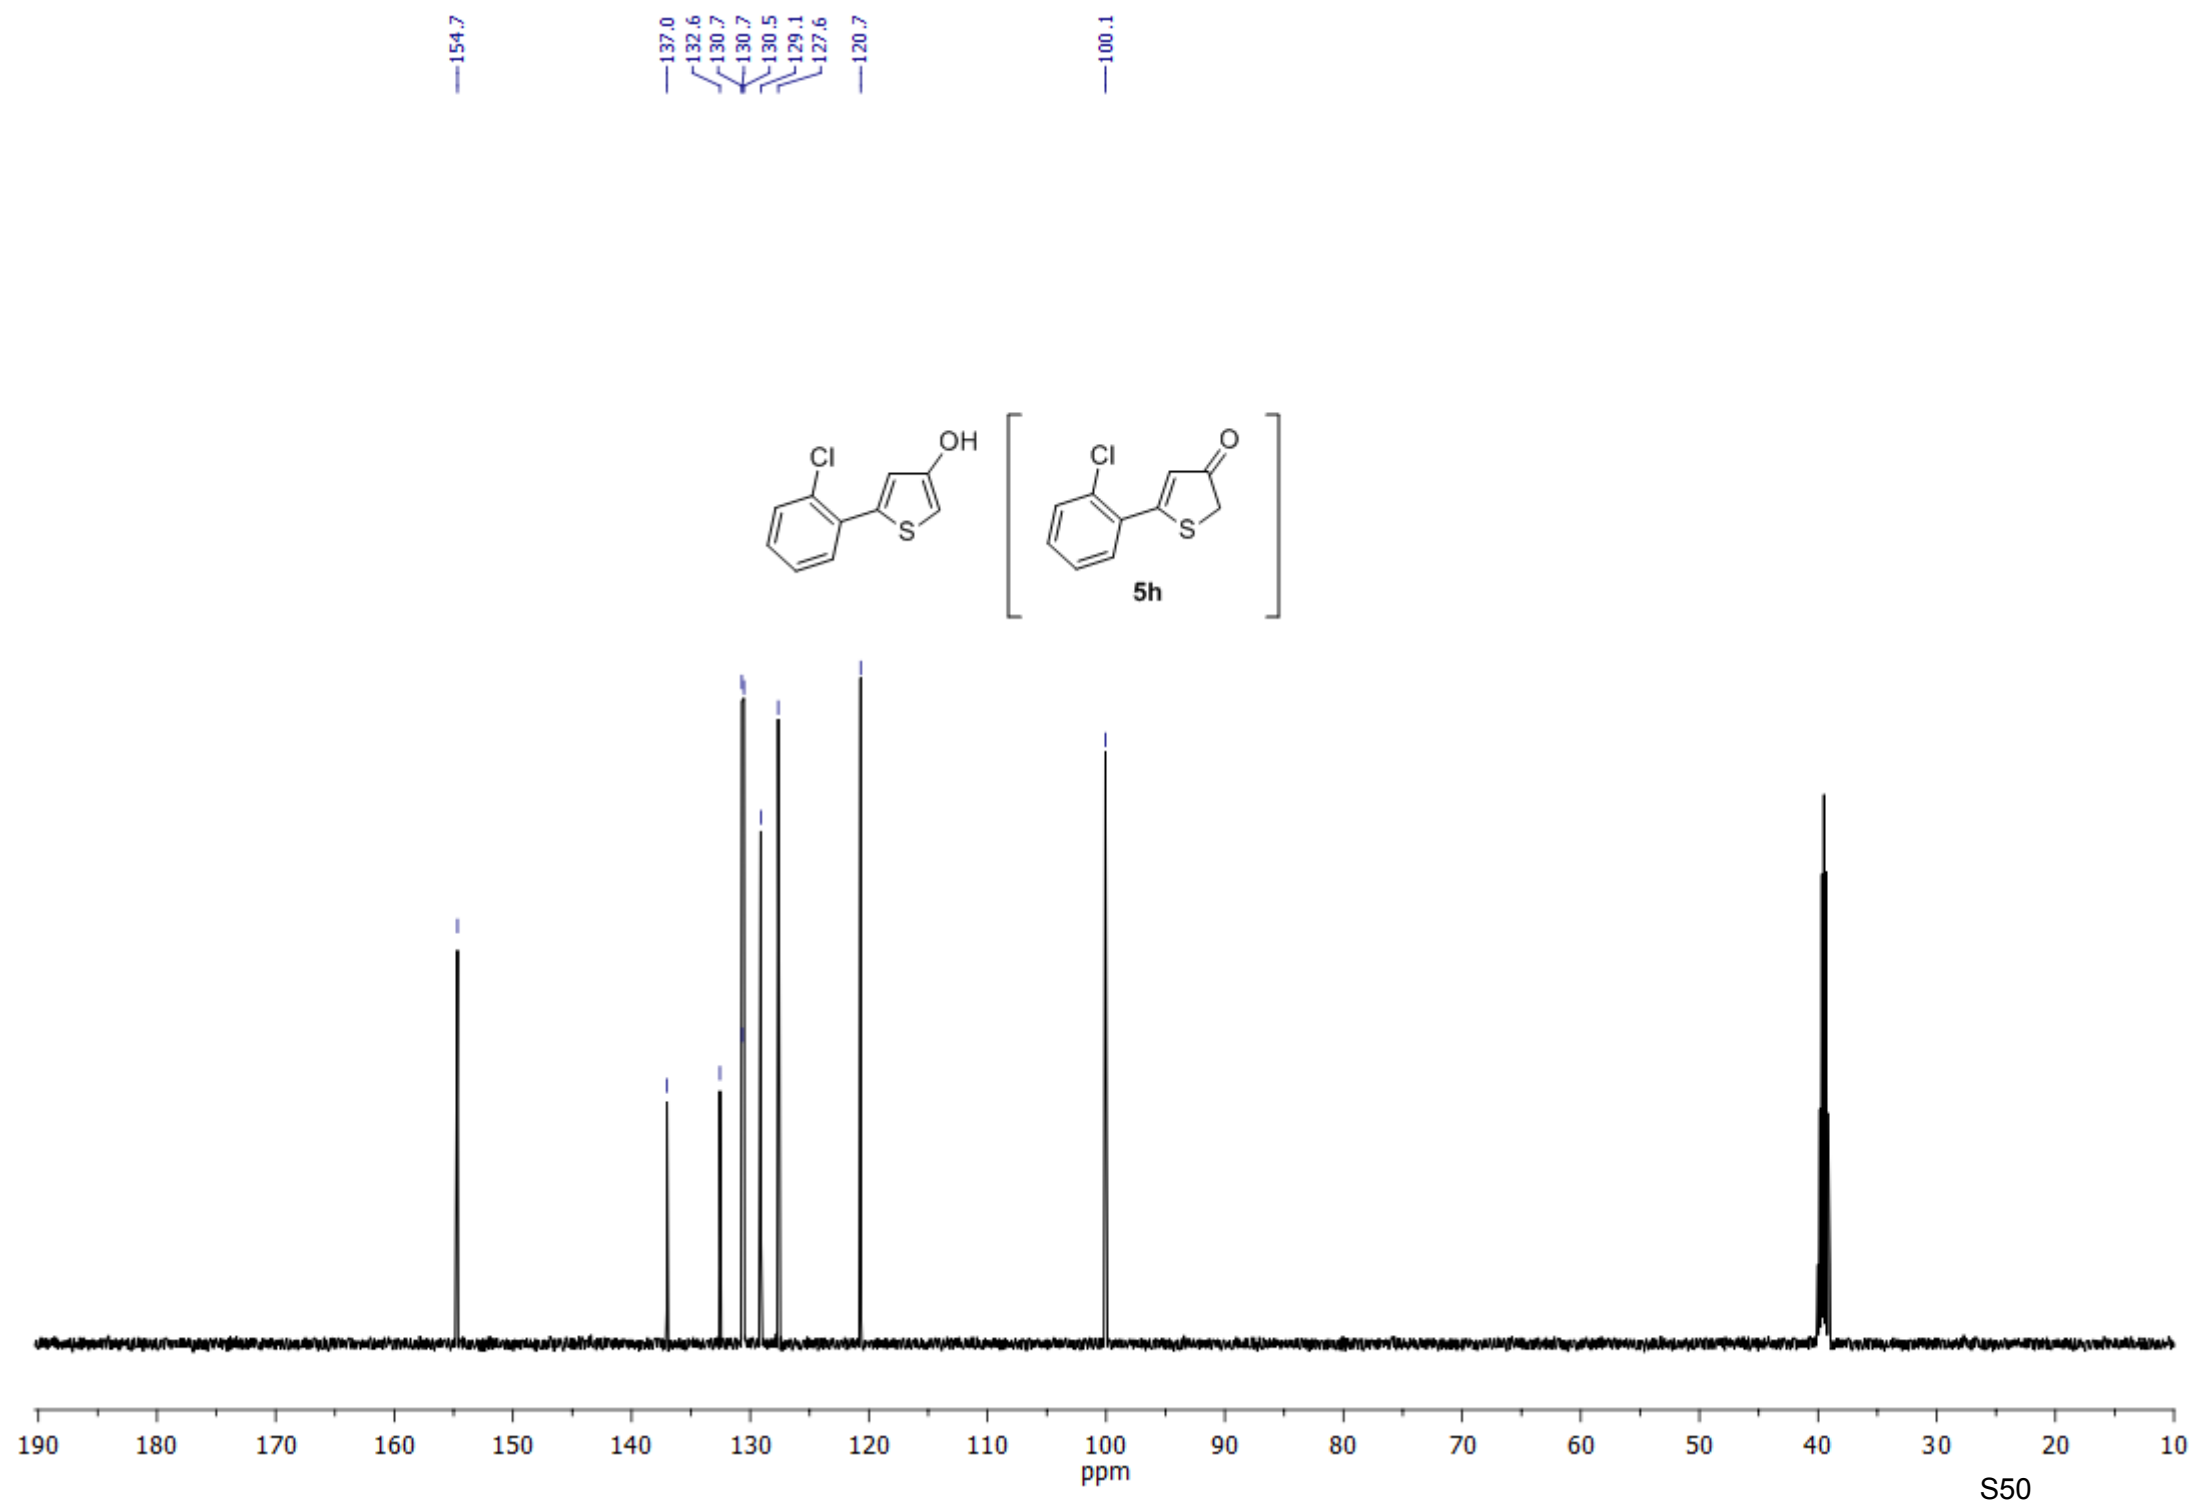

<sup>1</sup>H NMR (solvent: DMSO-*d*<sub>6</sub>), enol (3-hydroxythiophene) form of compound **5i**

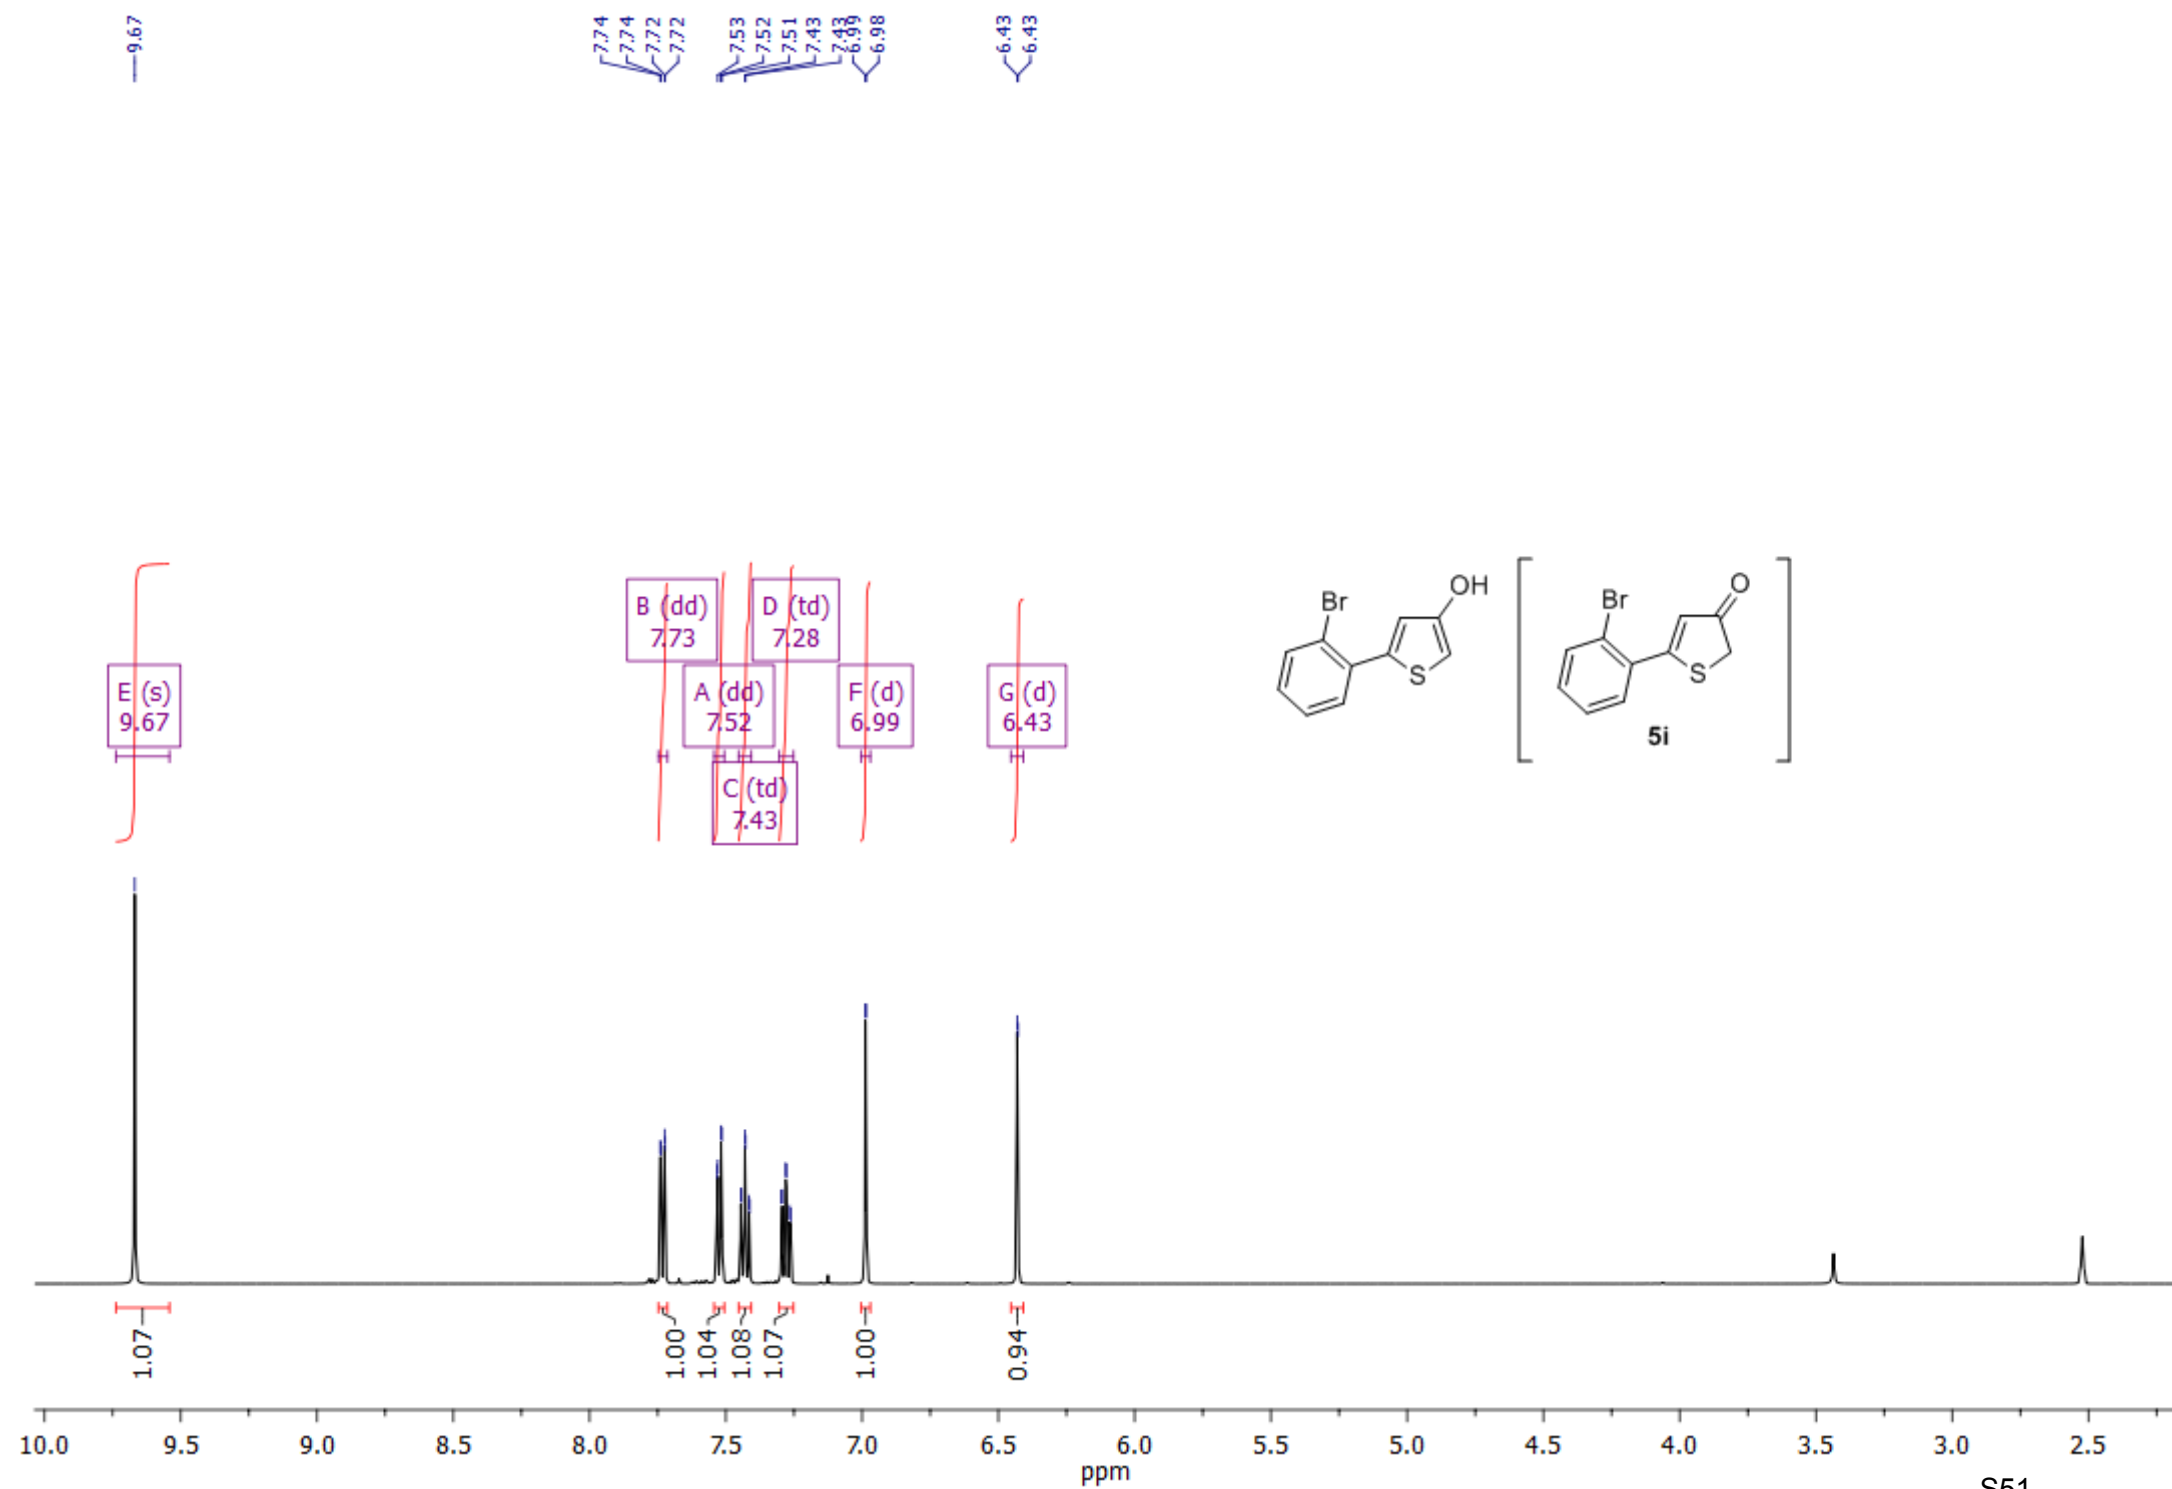

<sup>13</sup>C NMR (solvent: DMSO-*d*<sub>6</sub>), enol (3-hydroxythiophene) form of compound **5i**

154.5  
138.7  
134.7  
133.7  
131.3  
129.5  
128.1  
121.4  
120.8  
99.8

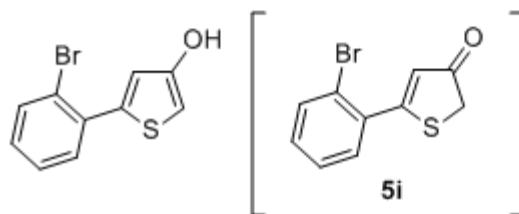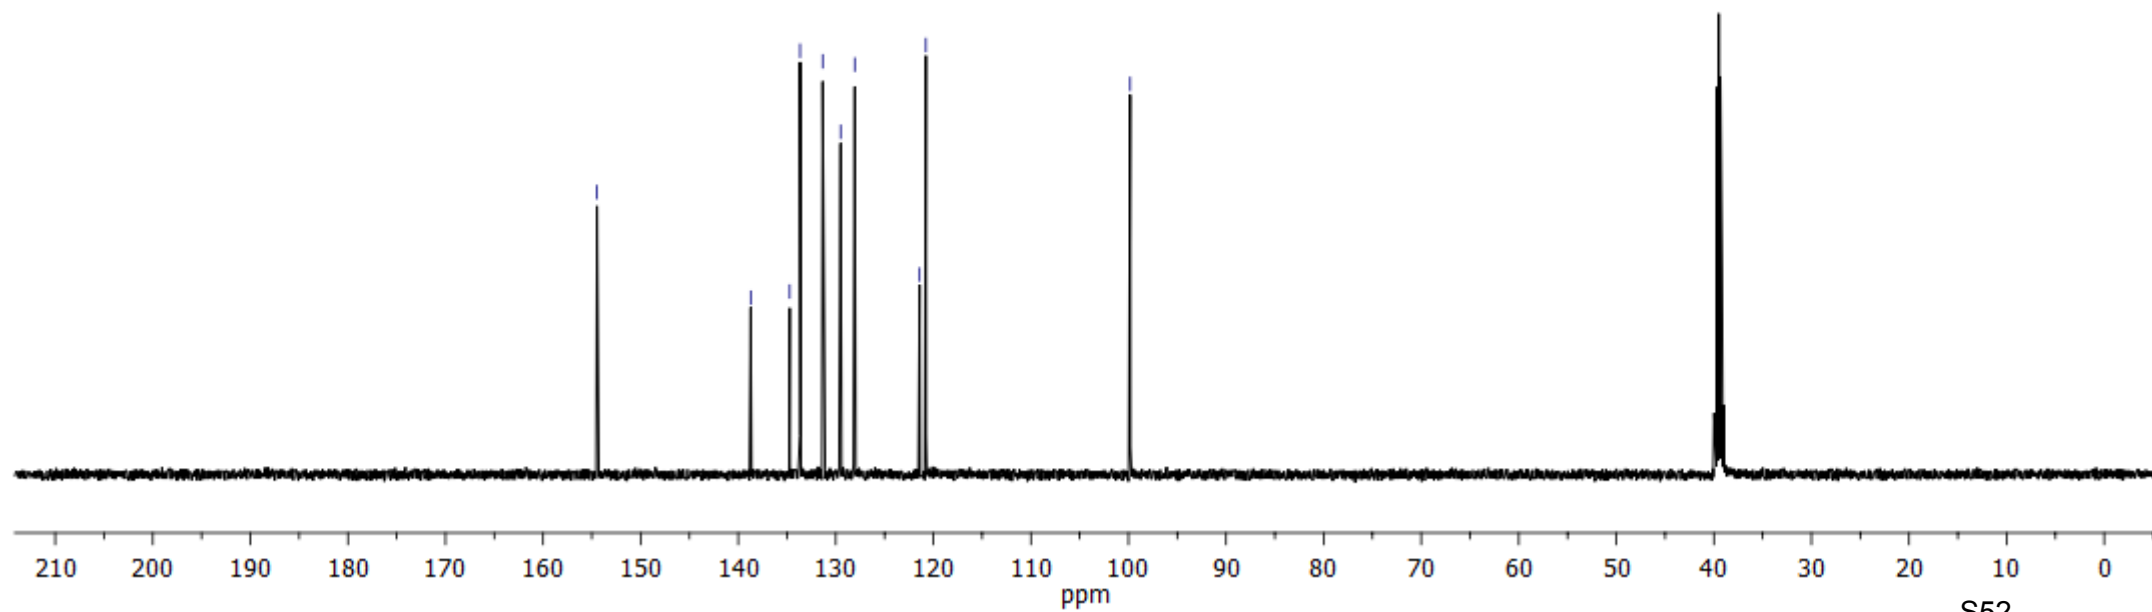

<sup>1</sup>H NMR (solvent: DMSO-*d*<sub>6</sub>), enol (3-hydroxythiophene) form of compound **5j**

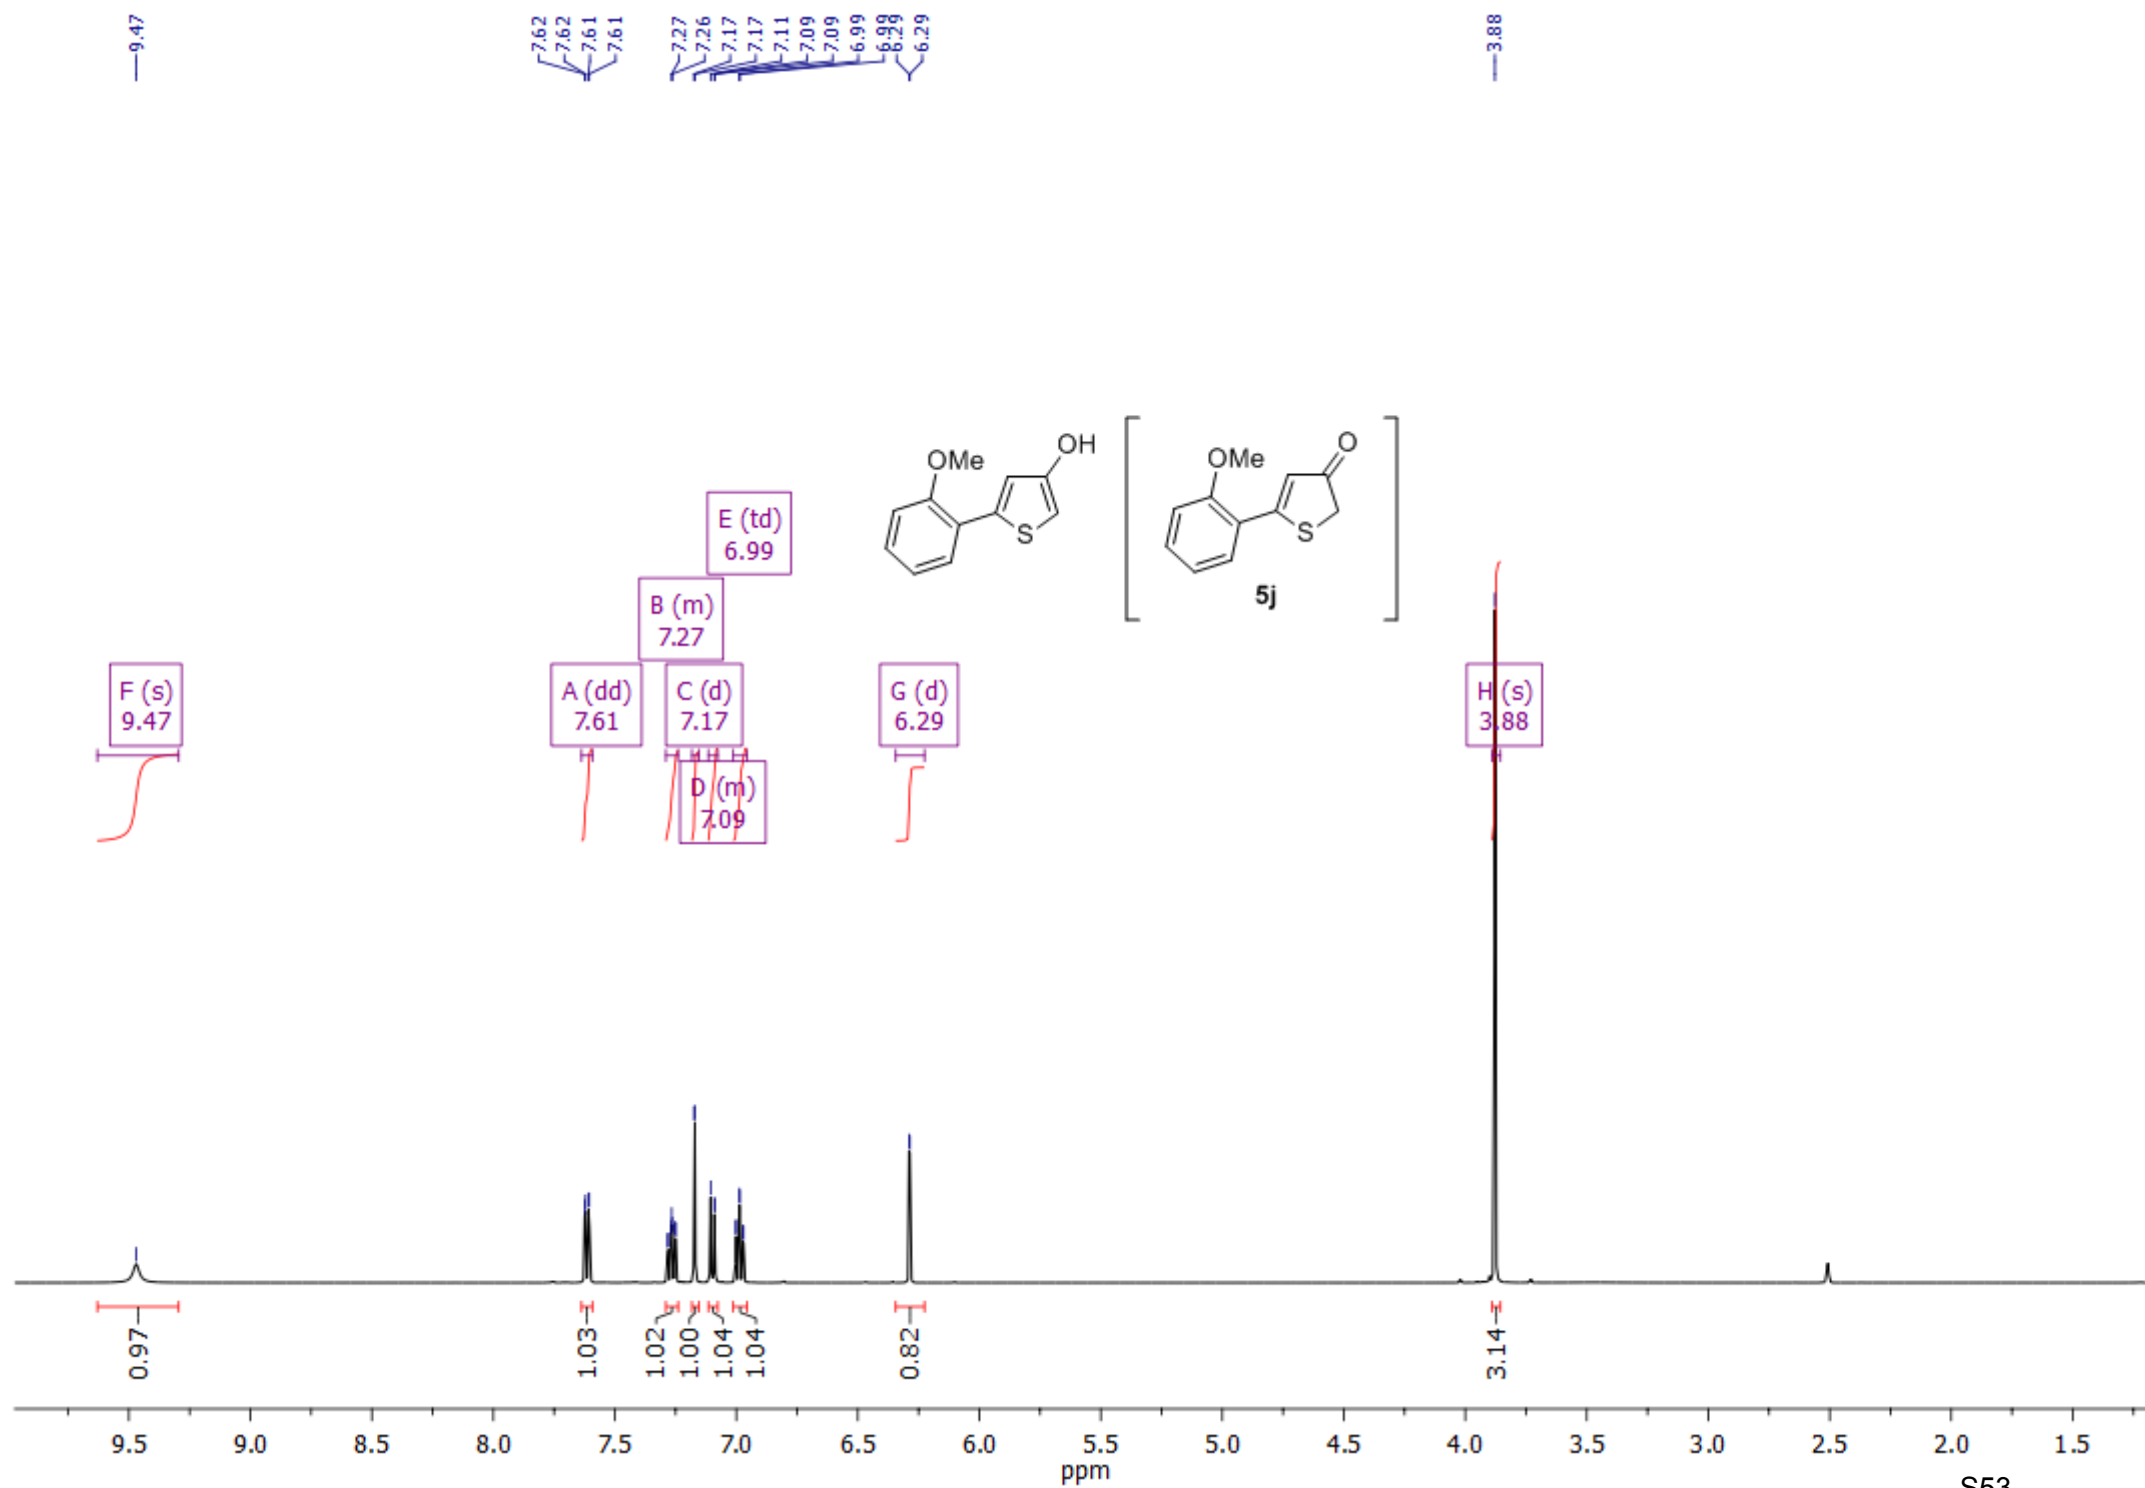

<sup>13</sup>C NMR (solvent: DMSO-*d*<sub>6</sub>), enol (3-hydroxythiophene) form of compound **5j**

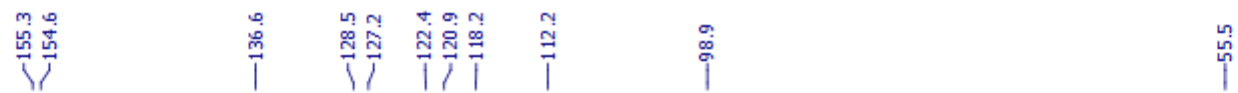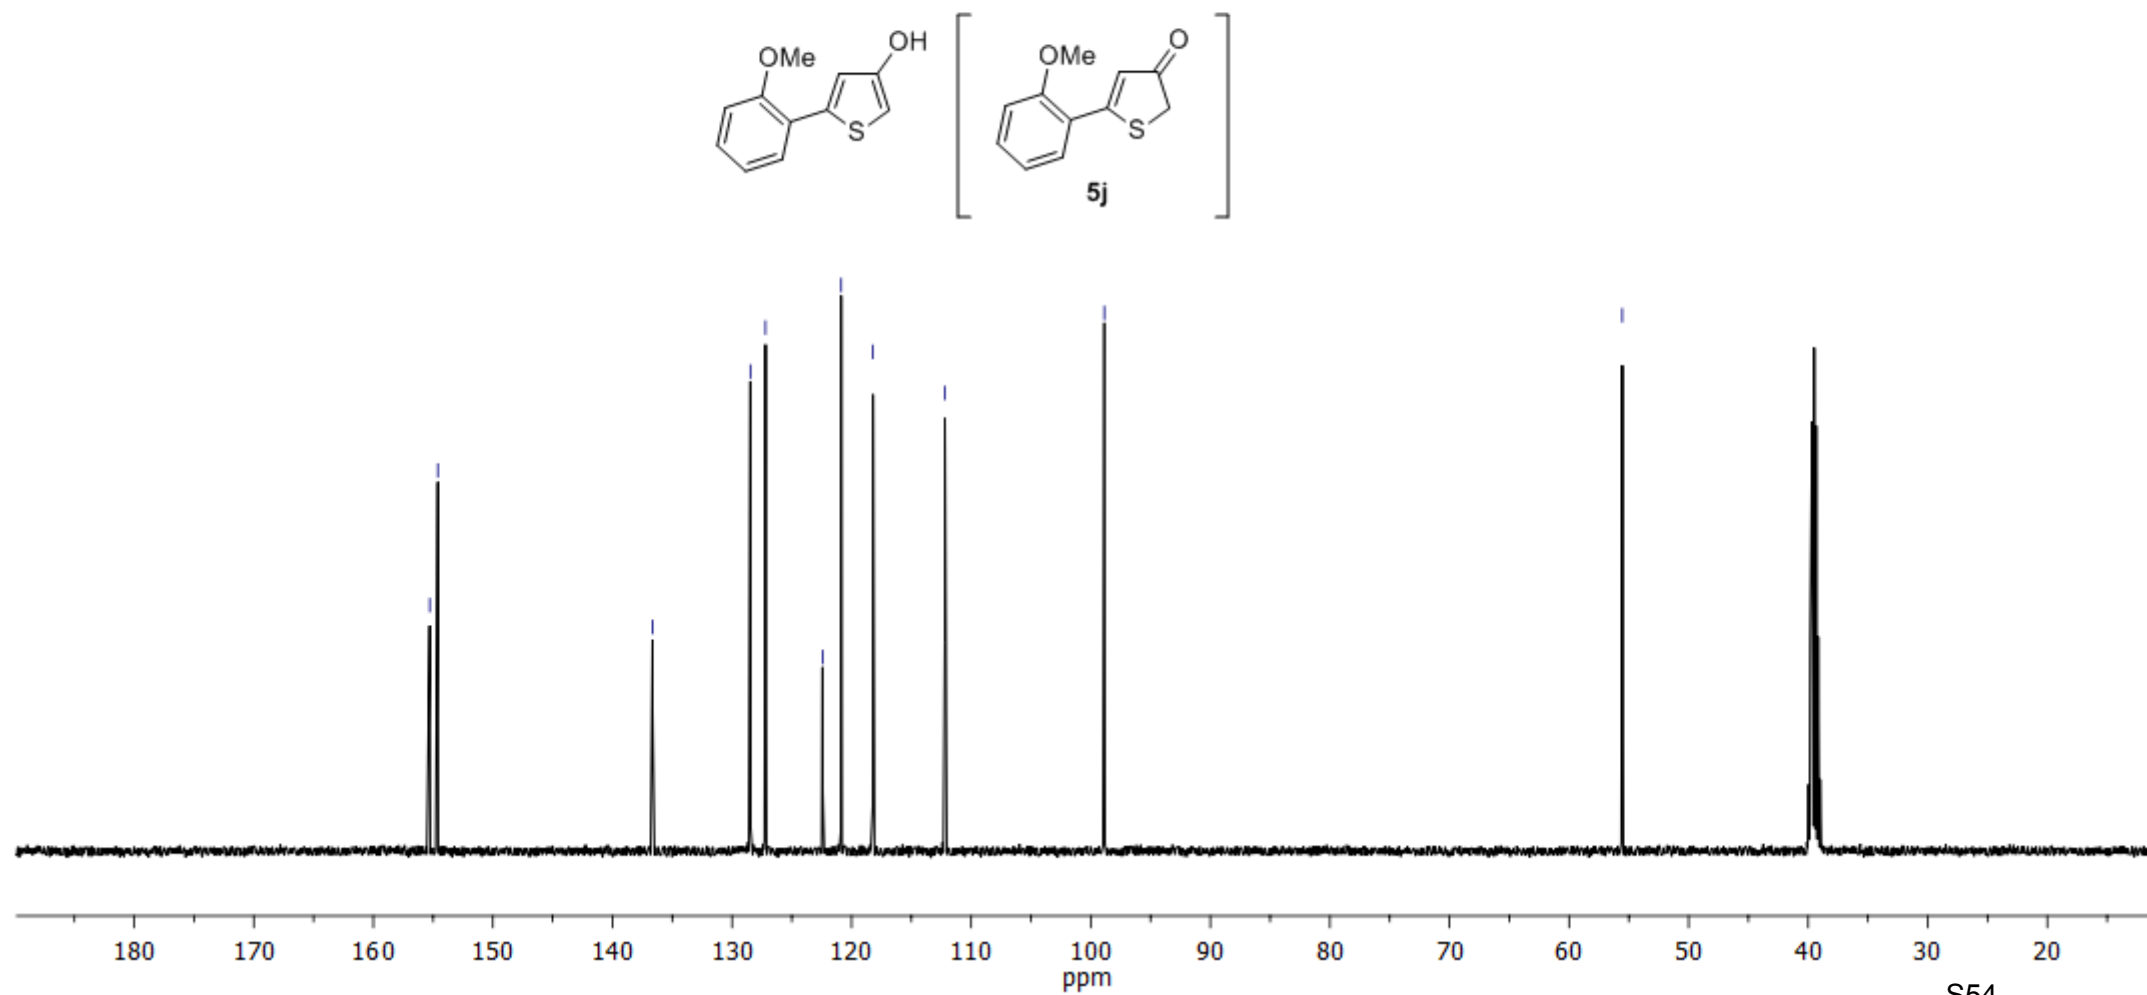

<sup>1</sup>H NMR (solvent: DMSO-*d*<sub>6</sub>), enol (3-hydroxythiophene) form of compound **5k**

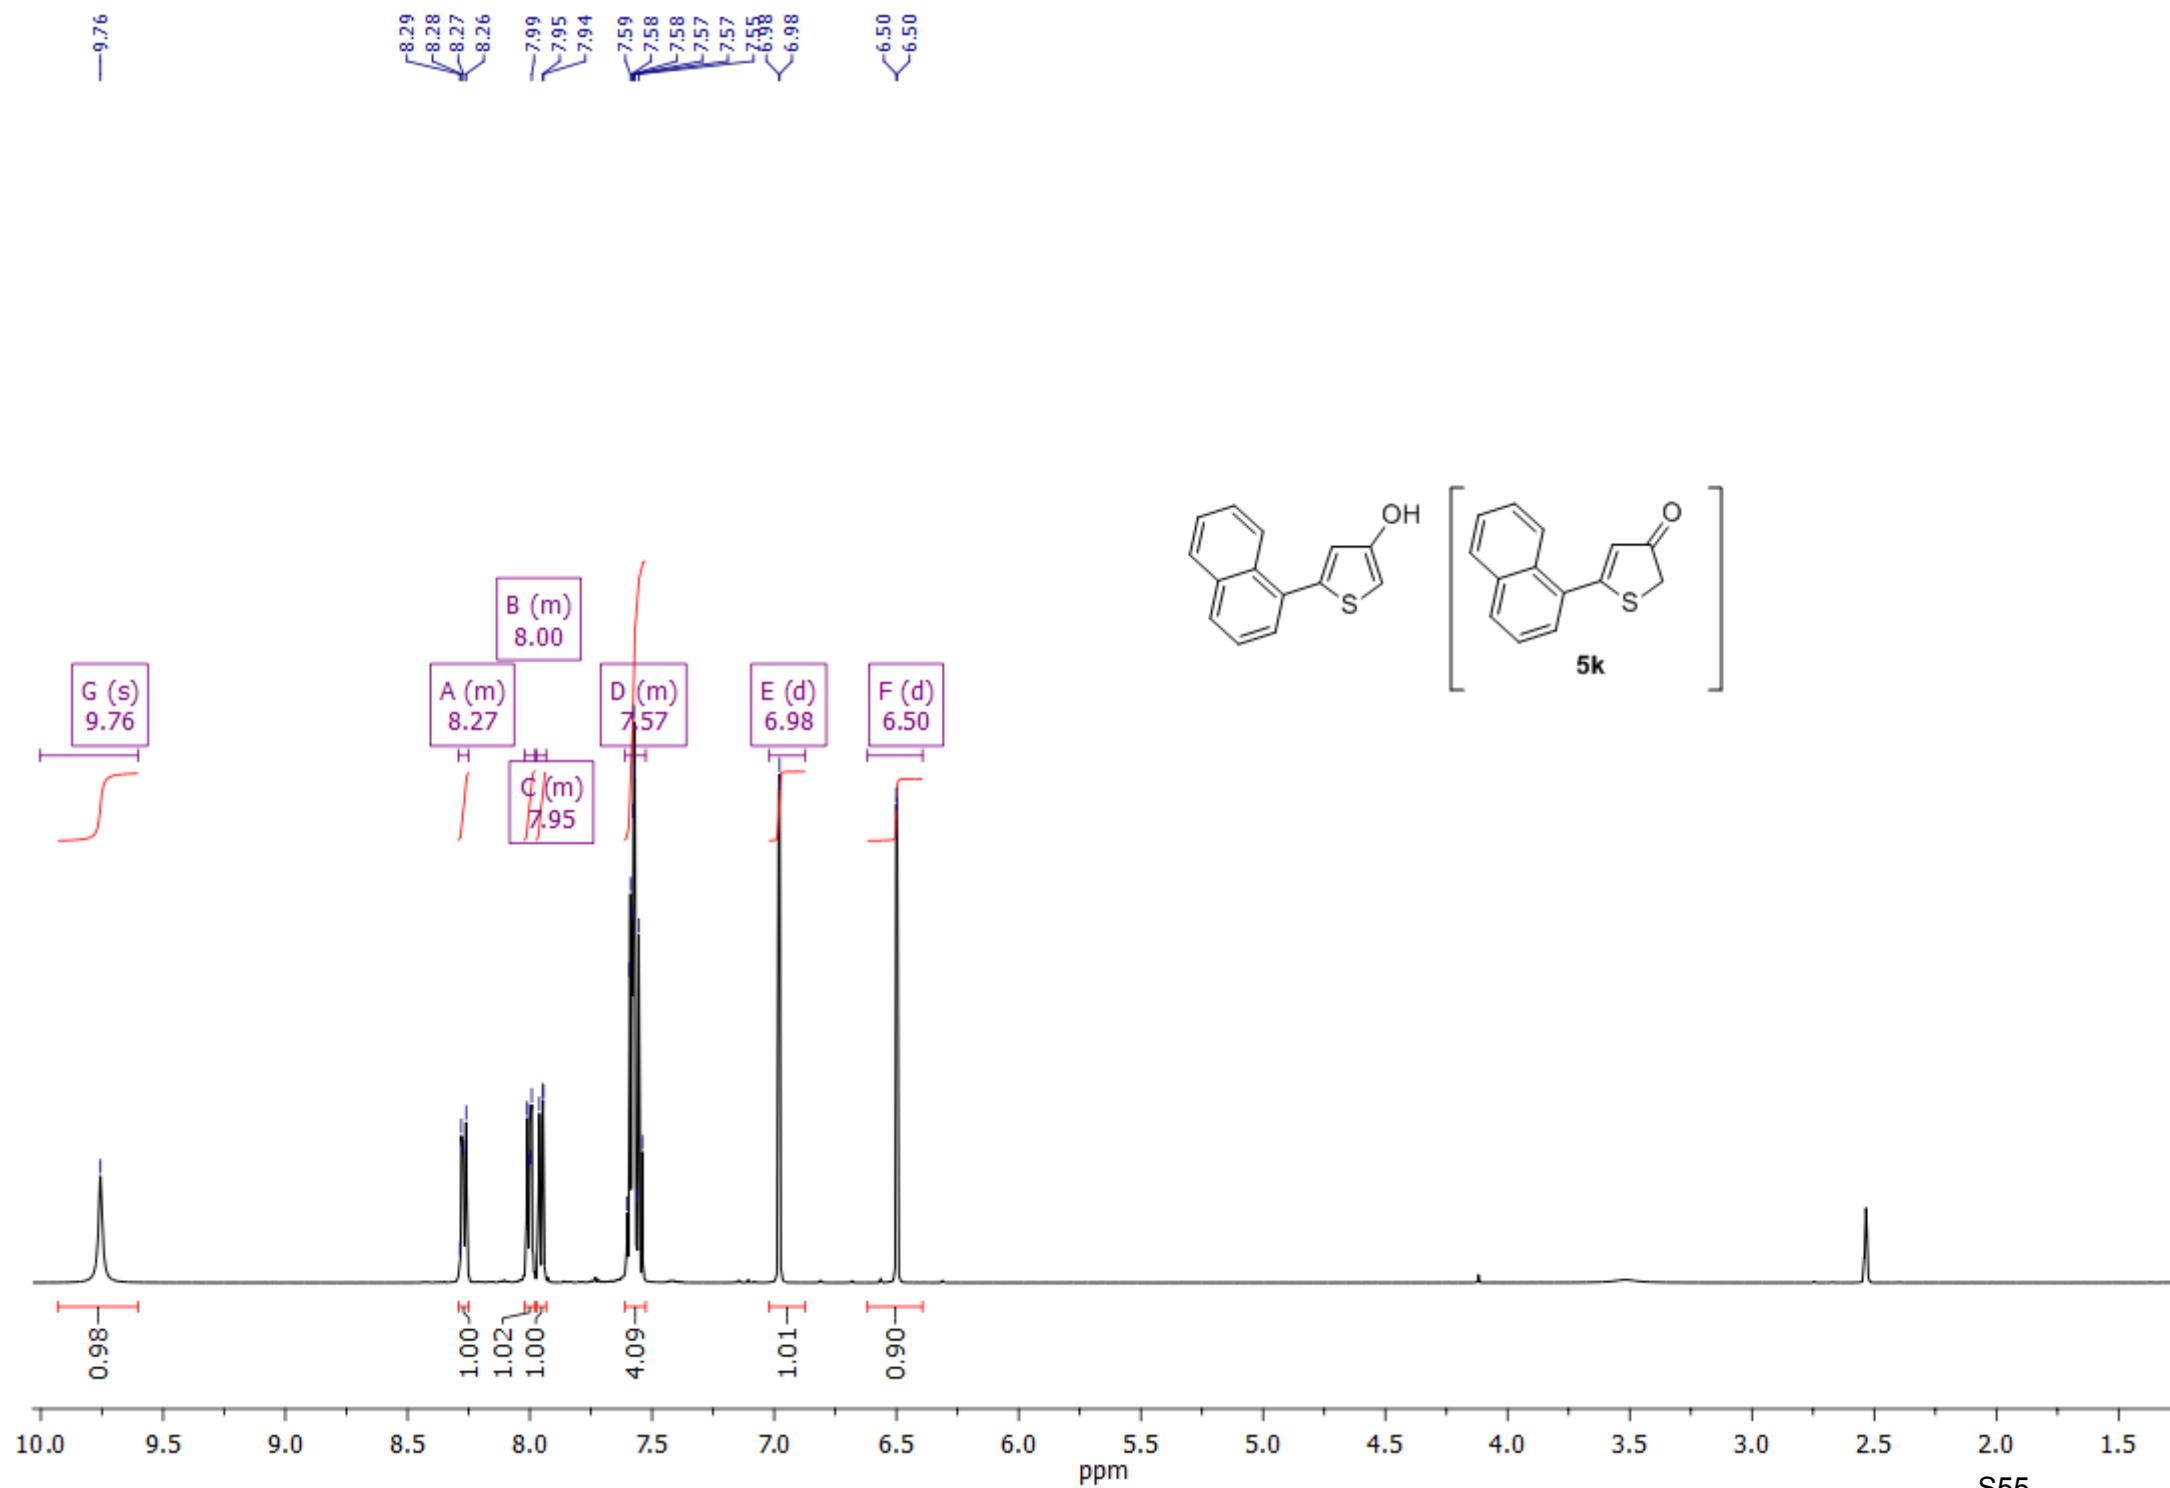

$^{13}\text{C}$  NMR (solvent:  $\text{DMSO-}d_6$ ), enol (3-hydroxythiophene) form of compound **5k**

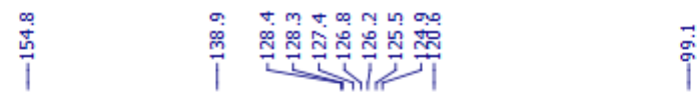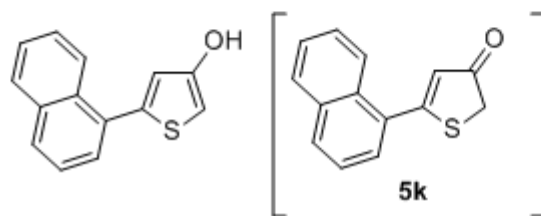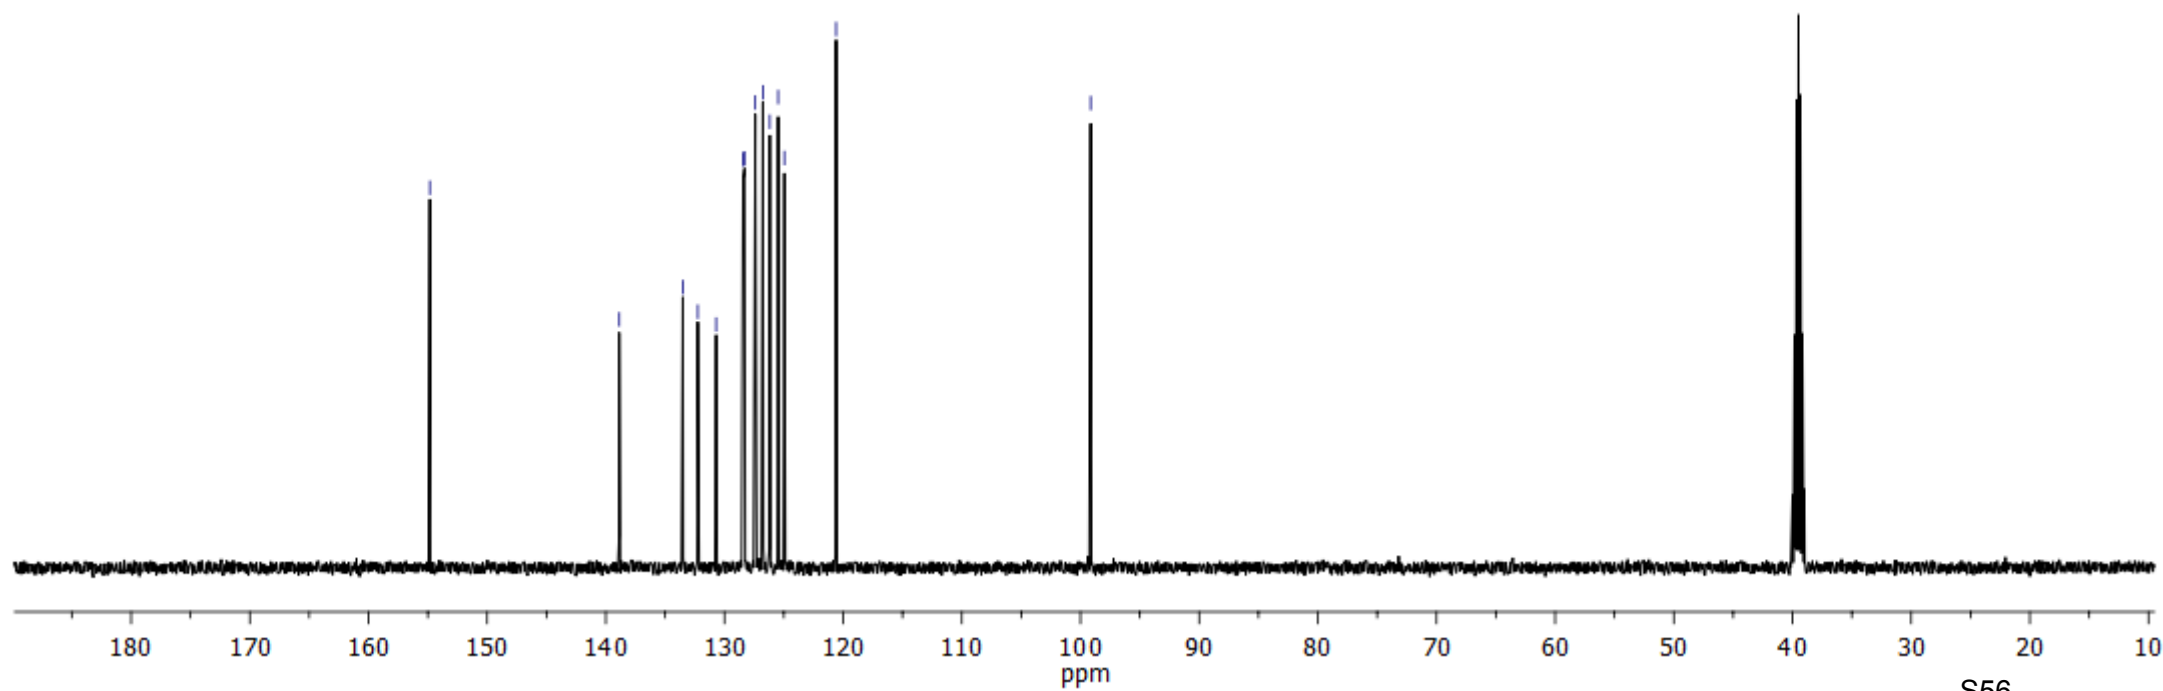



<sup>1</sup>H NMR (solvent: CDCl<sub>3</sub>)

7.58  
7.57  
7.56  
7.55

7.15  
7.14  
7.13

6.41

3.82

D (m)  
7.57

C (m)  
7.14

B (s)  
6.41

A (s)  
3.82

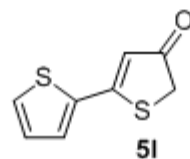

2.00

1.04

0.92

2.04

9.0 8.5 8.0 7.5 7.0 6.5 6.0 5.5 5.0 4.5 4.0 3.5 3.0 2.5 2.0 1.5 1.0  
ppm

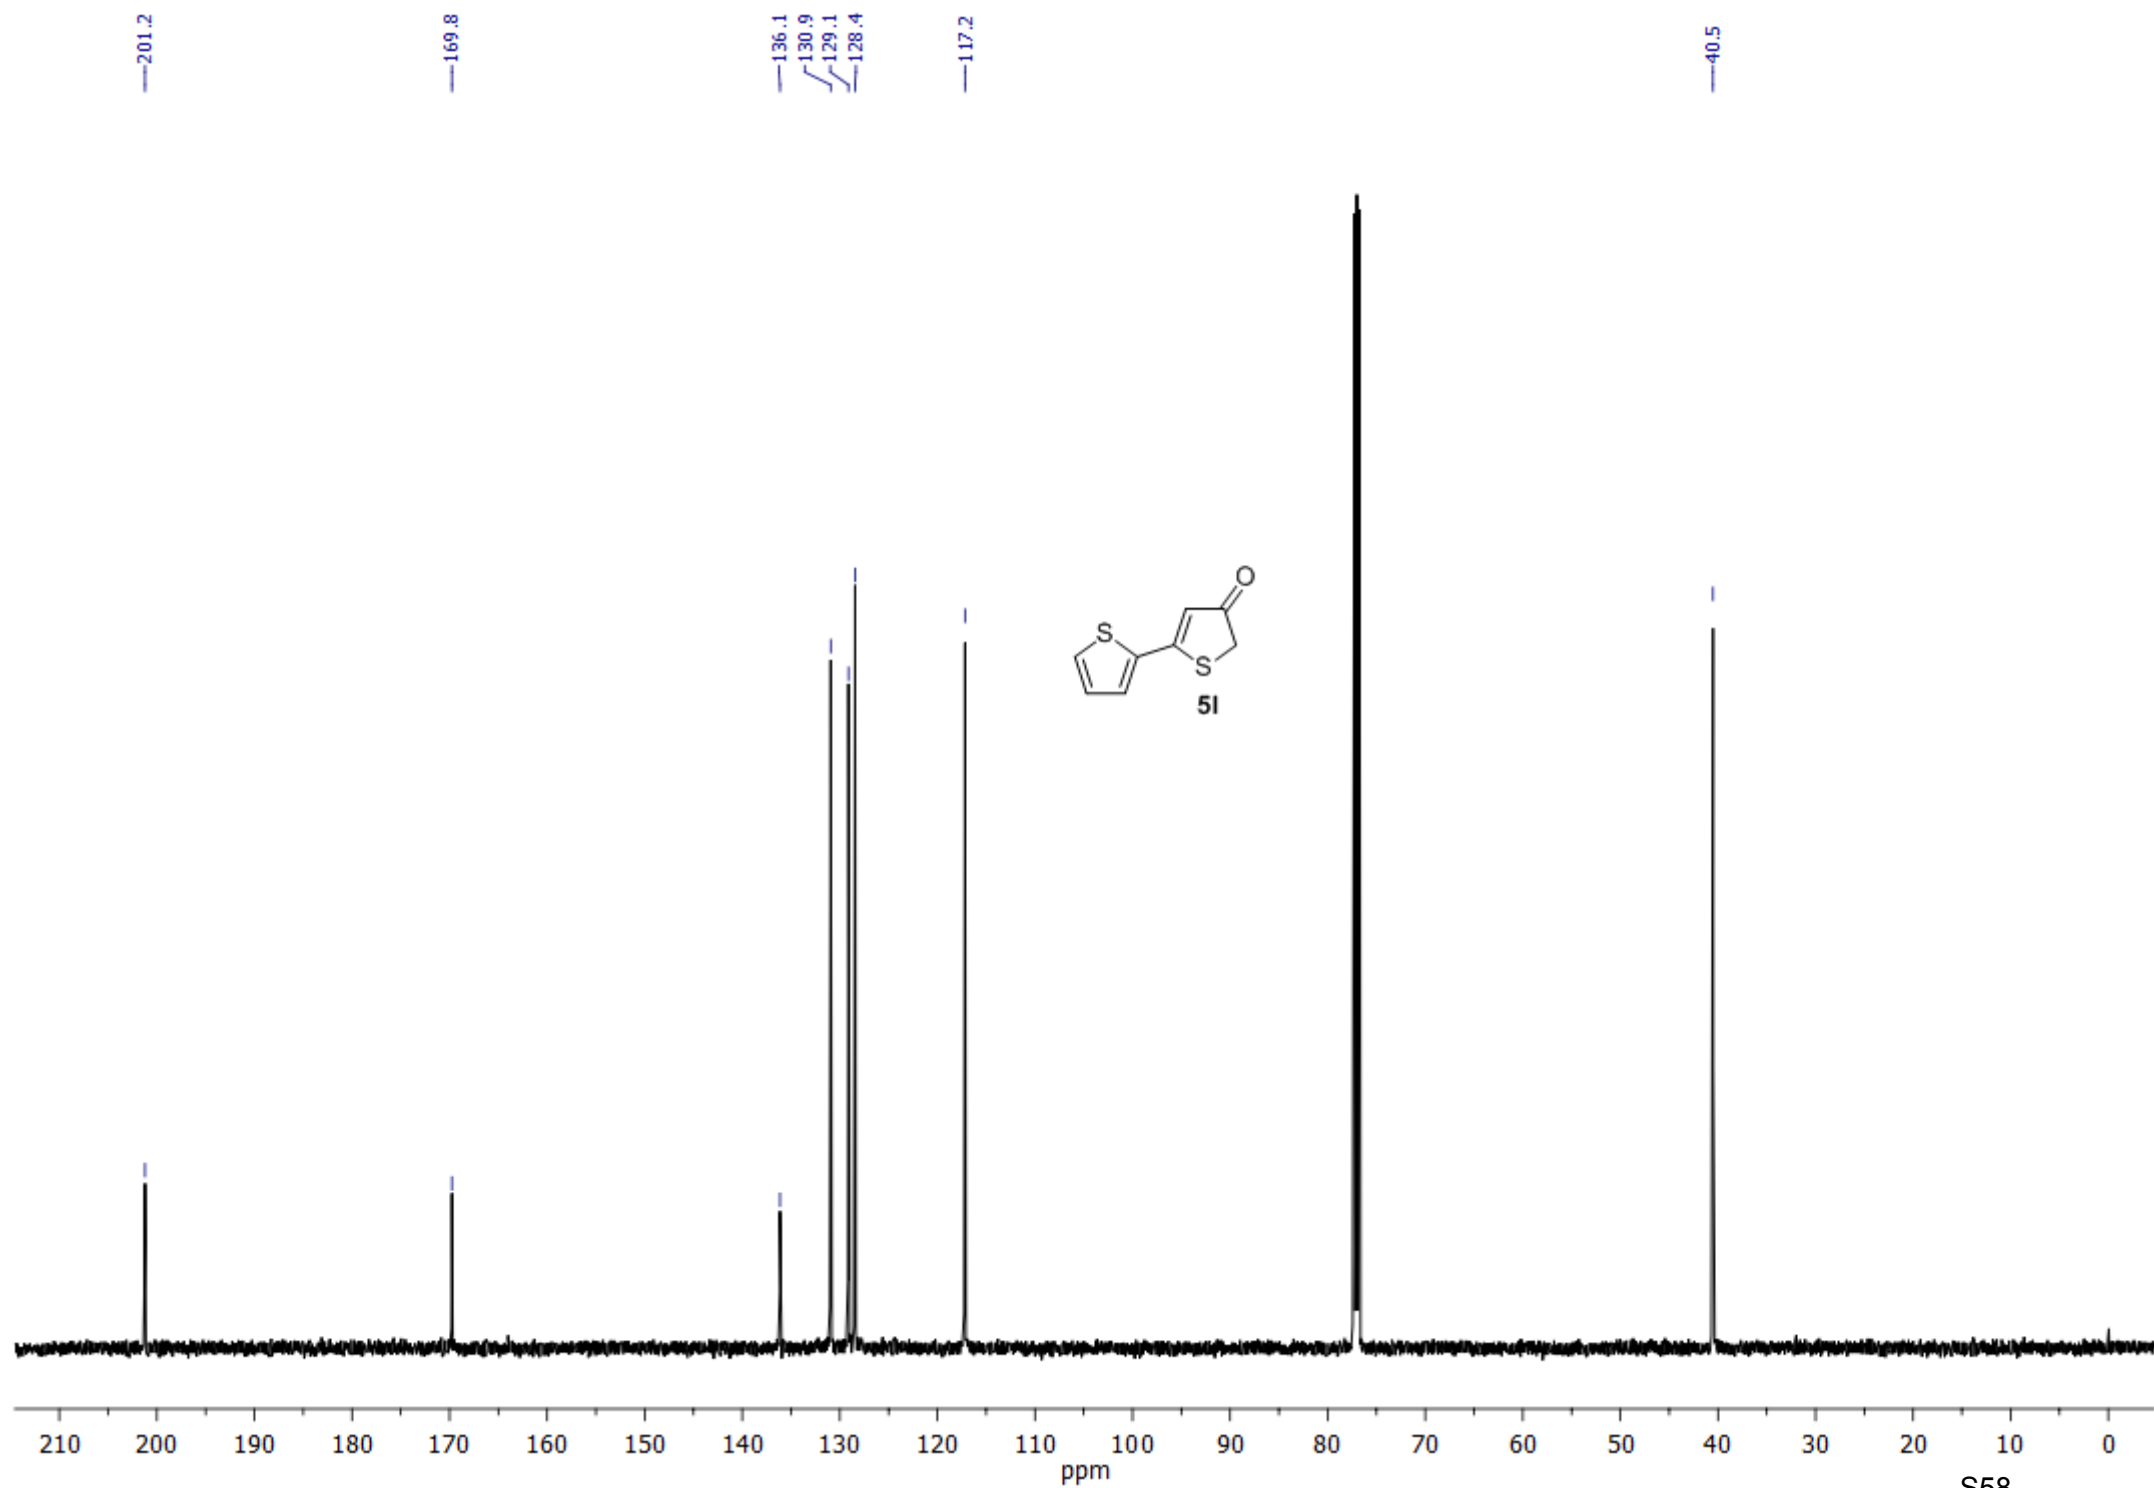

<sup>1</sup>H NMR (solvent: CDCl<sub>3</sub>), crude compound **5m**

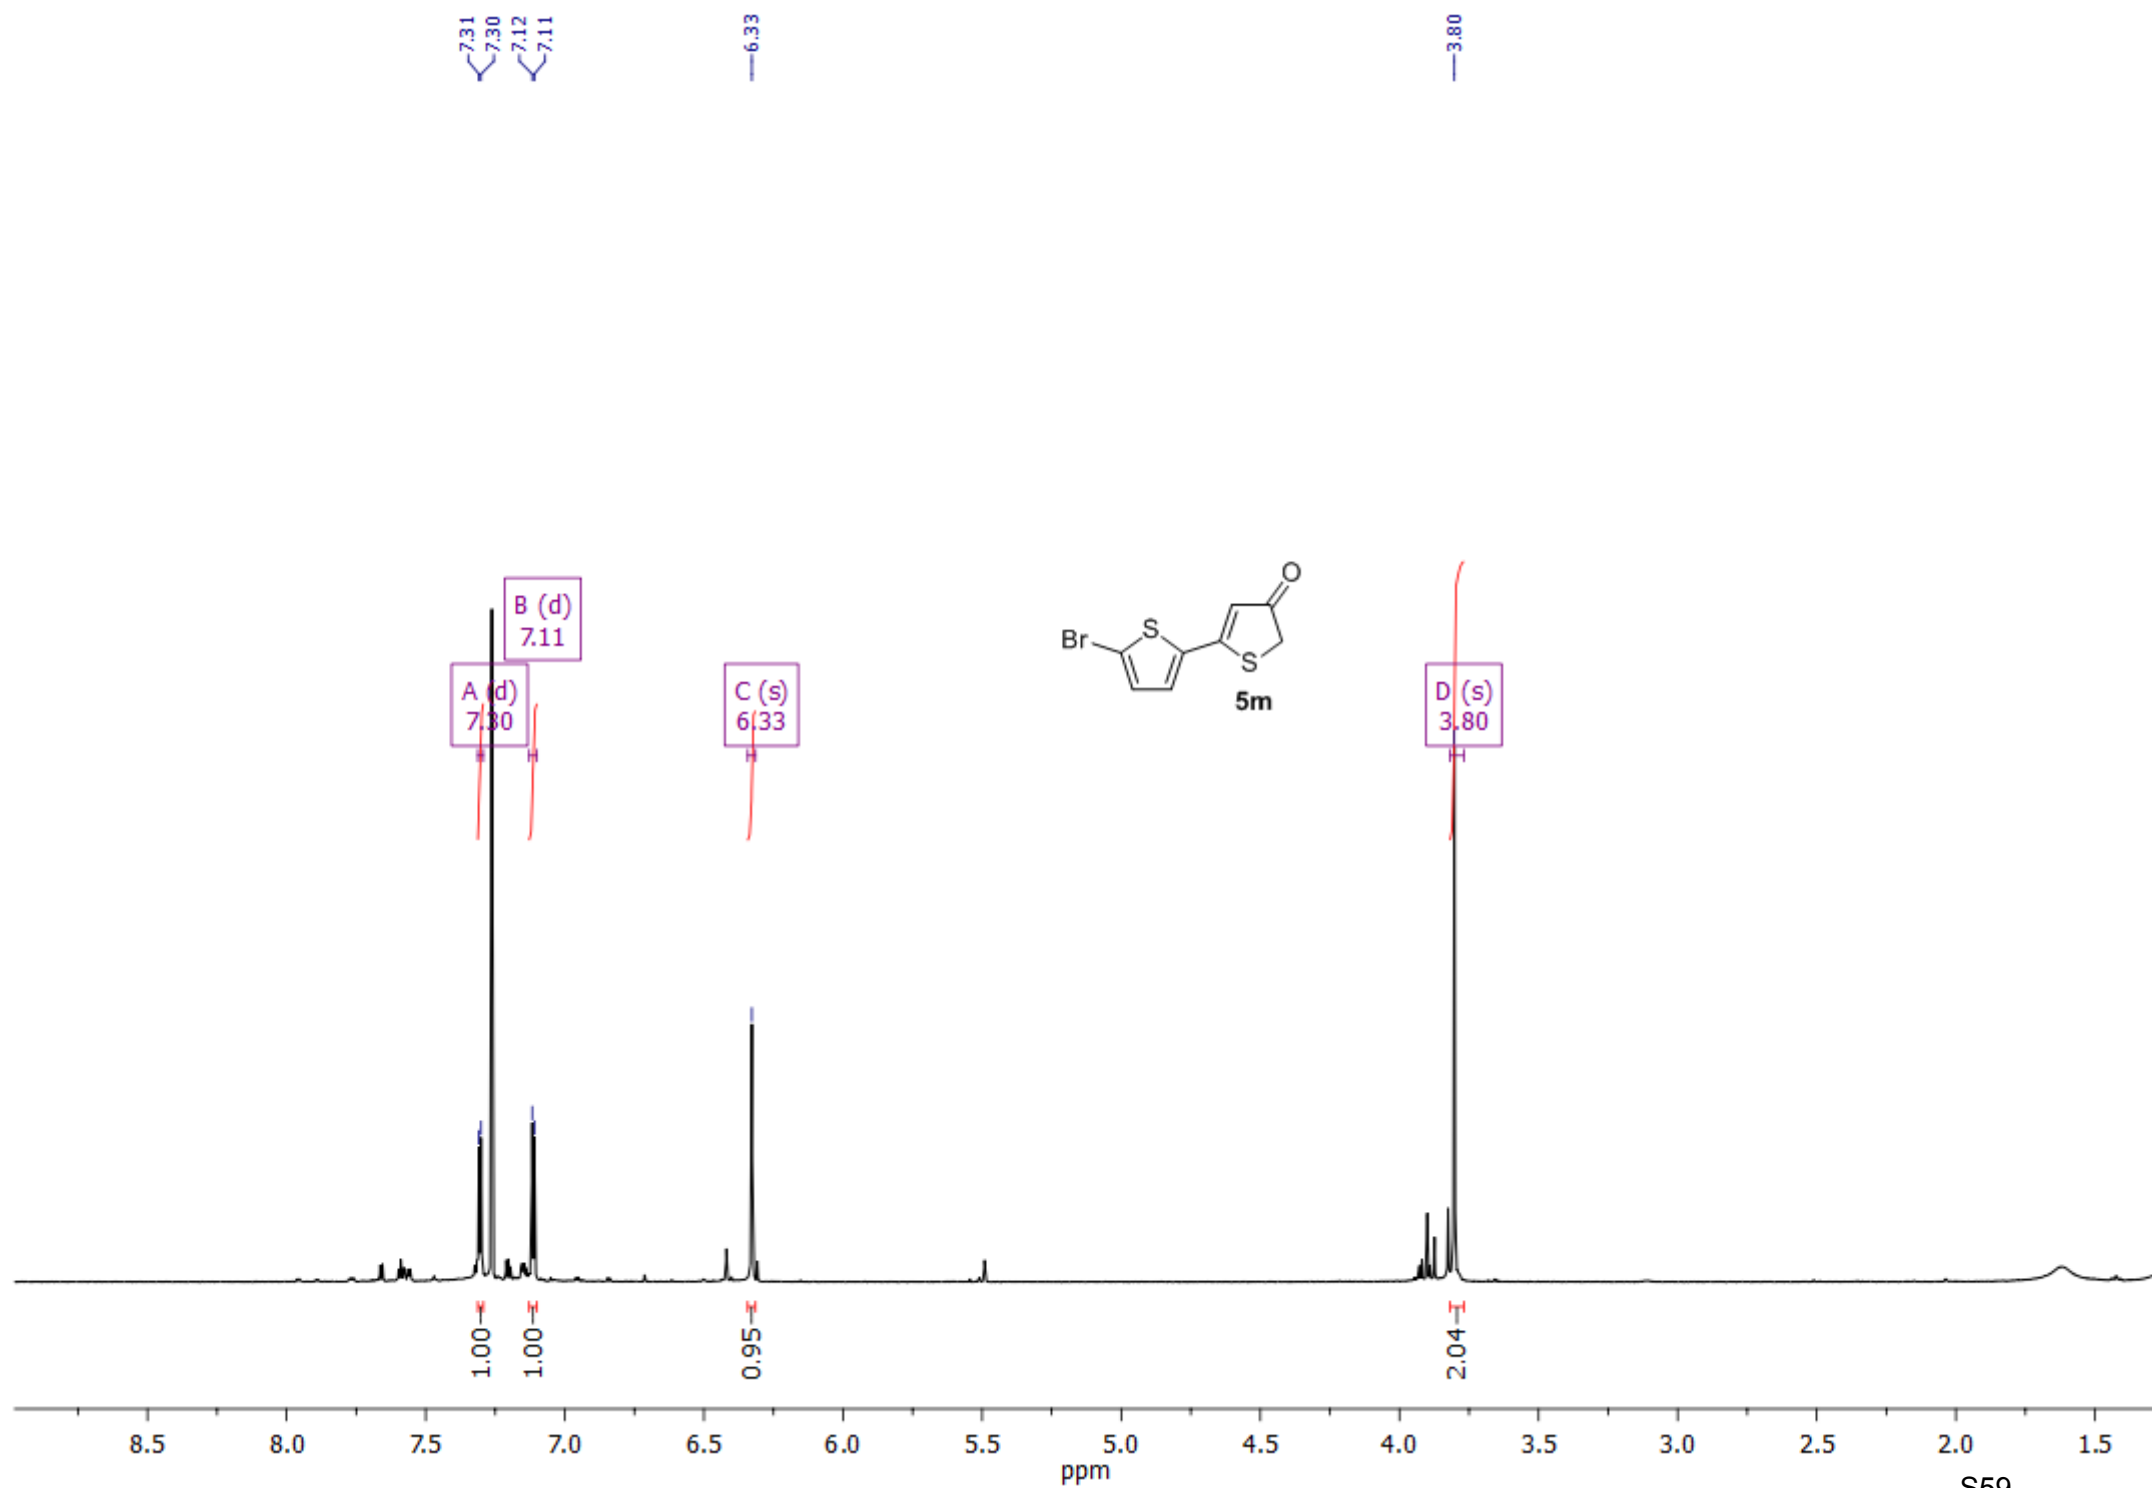

<sup>1</sup>H NMR (solvent: CDCl<sub>3</sub>)

7.65  
7.65  
7.63  
7.54  
7.53  
7.45  
7.44  
7.43  
7.43  
7.41  
7.40  
7.39  
7.38  
7.37  
7.36  
7.35  
7.34  
7.33  
6.42  
3.83

B (m)  
7.64  
A (d)  
7.53  
C (m)  
7.43  
G (m)  
7.37  
F (d)  
7.34

E (s)  
6.42

D (s)  
3.83

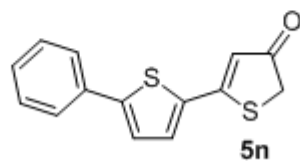

2.05  
1.00  
2.14  
1.02  
1.01

0.96

1.93

8.5 8.0 7.5 7.0 6.5 6.0 5.5 5.0 4.5 4.0 3.5 3.0 2.5 2.0 1.5  
ppm

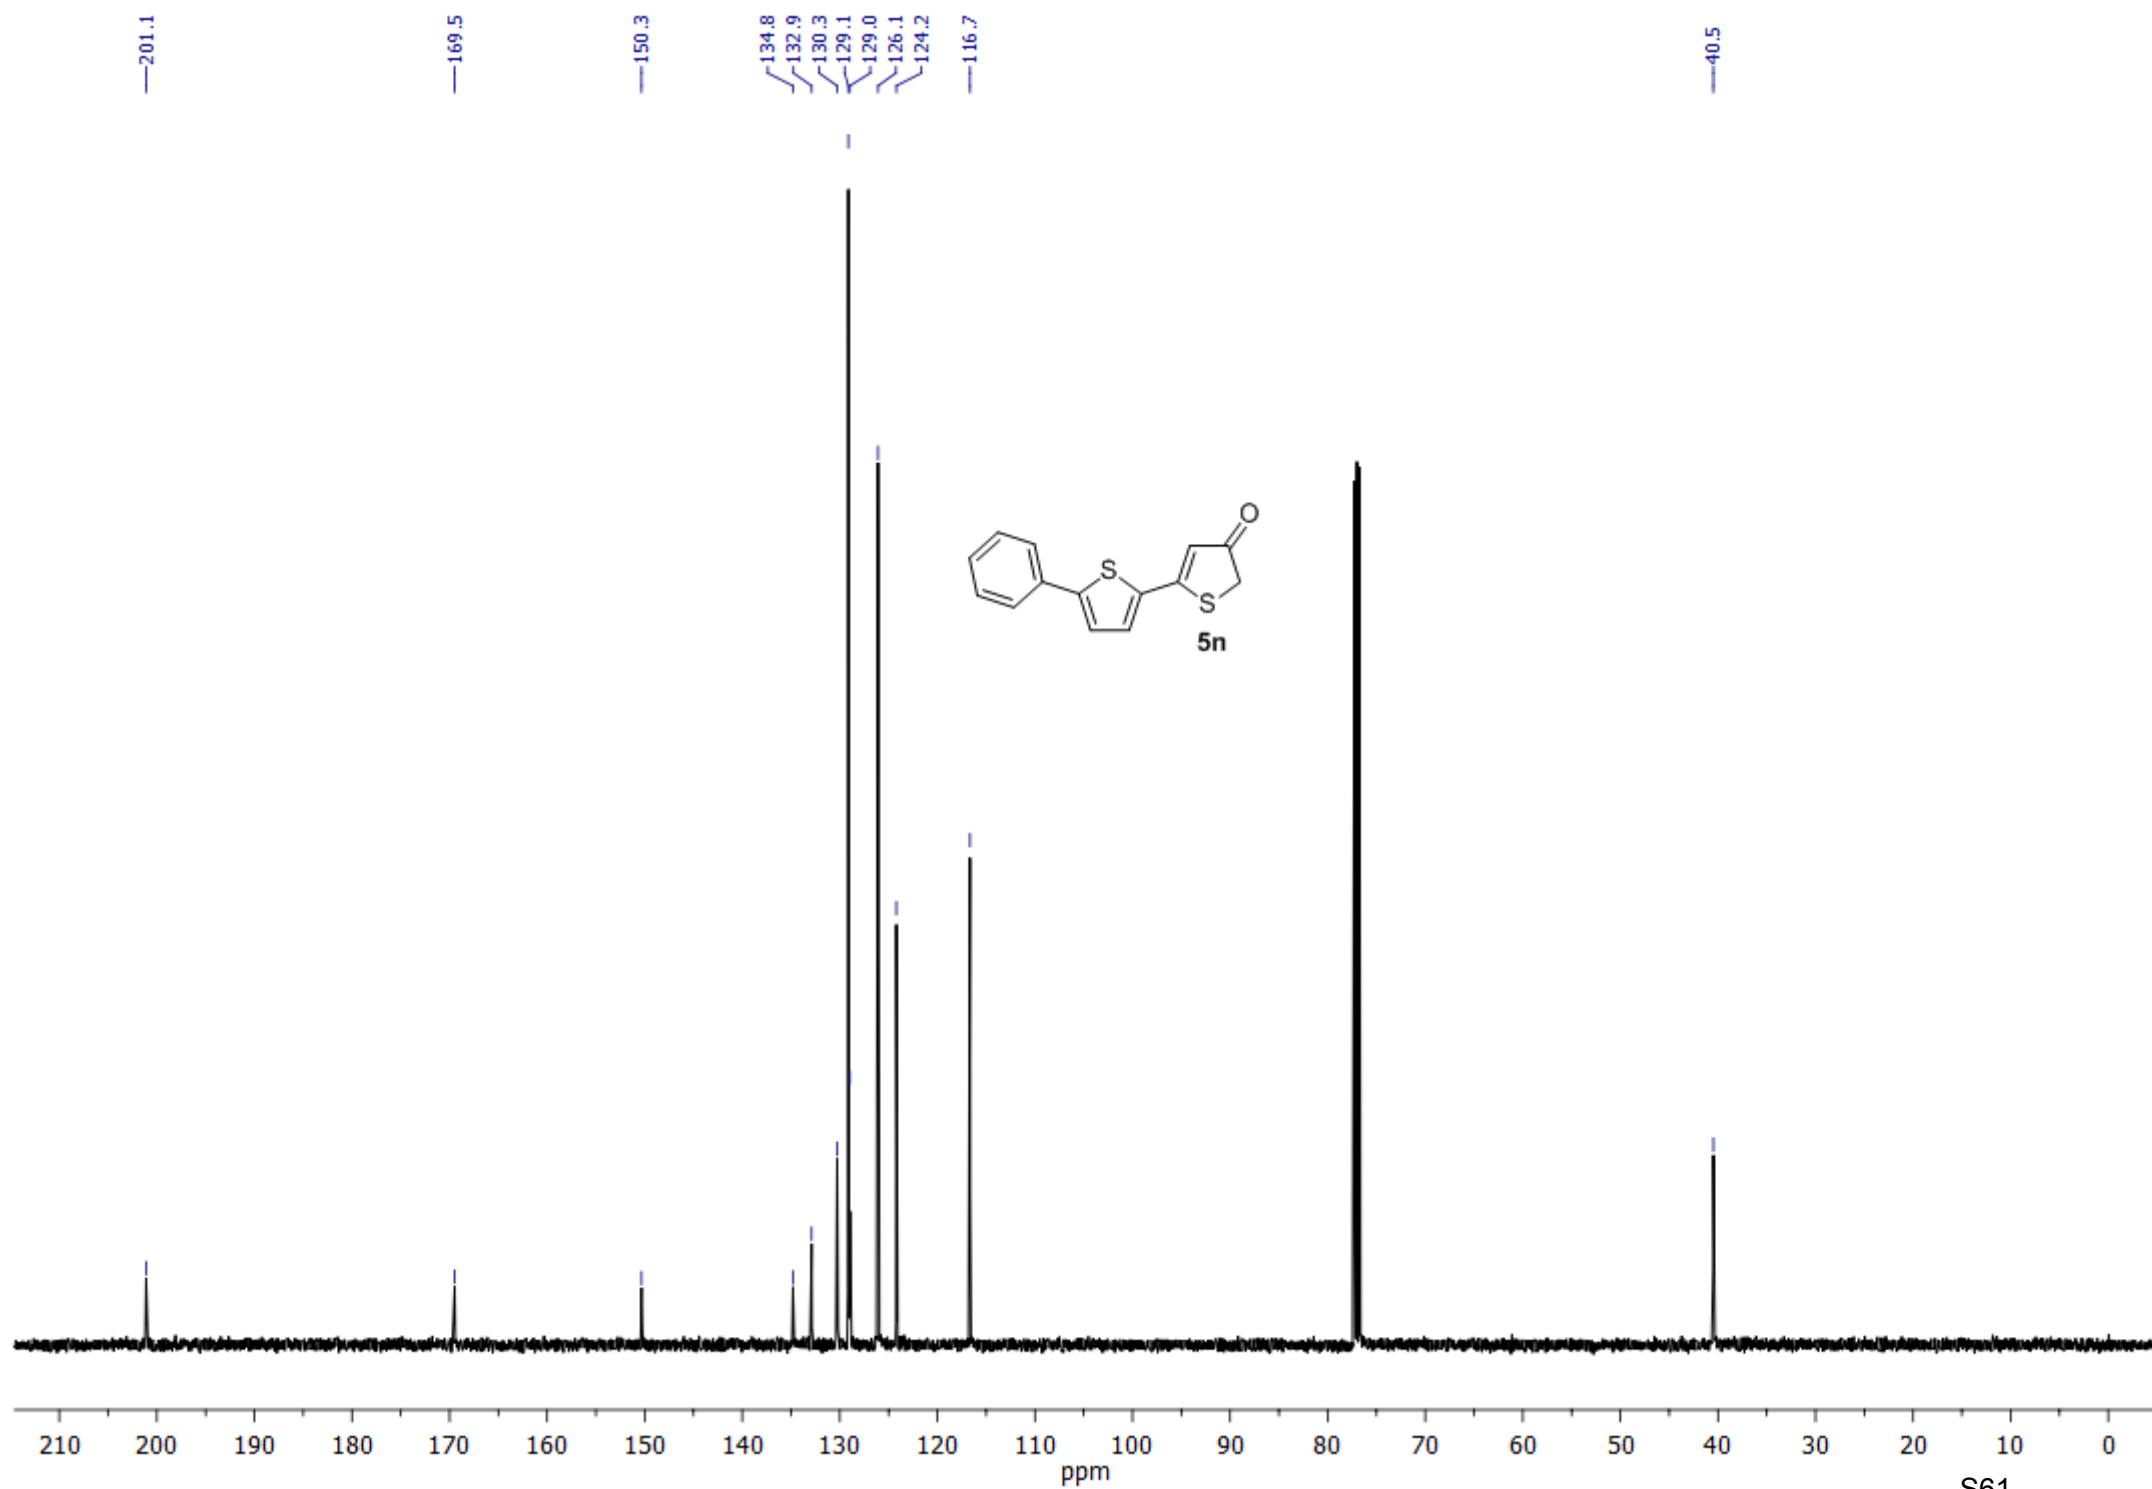

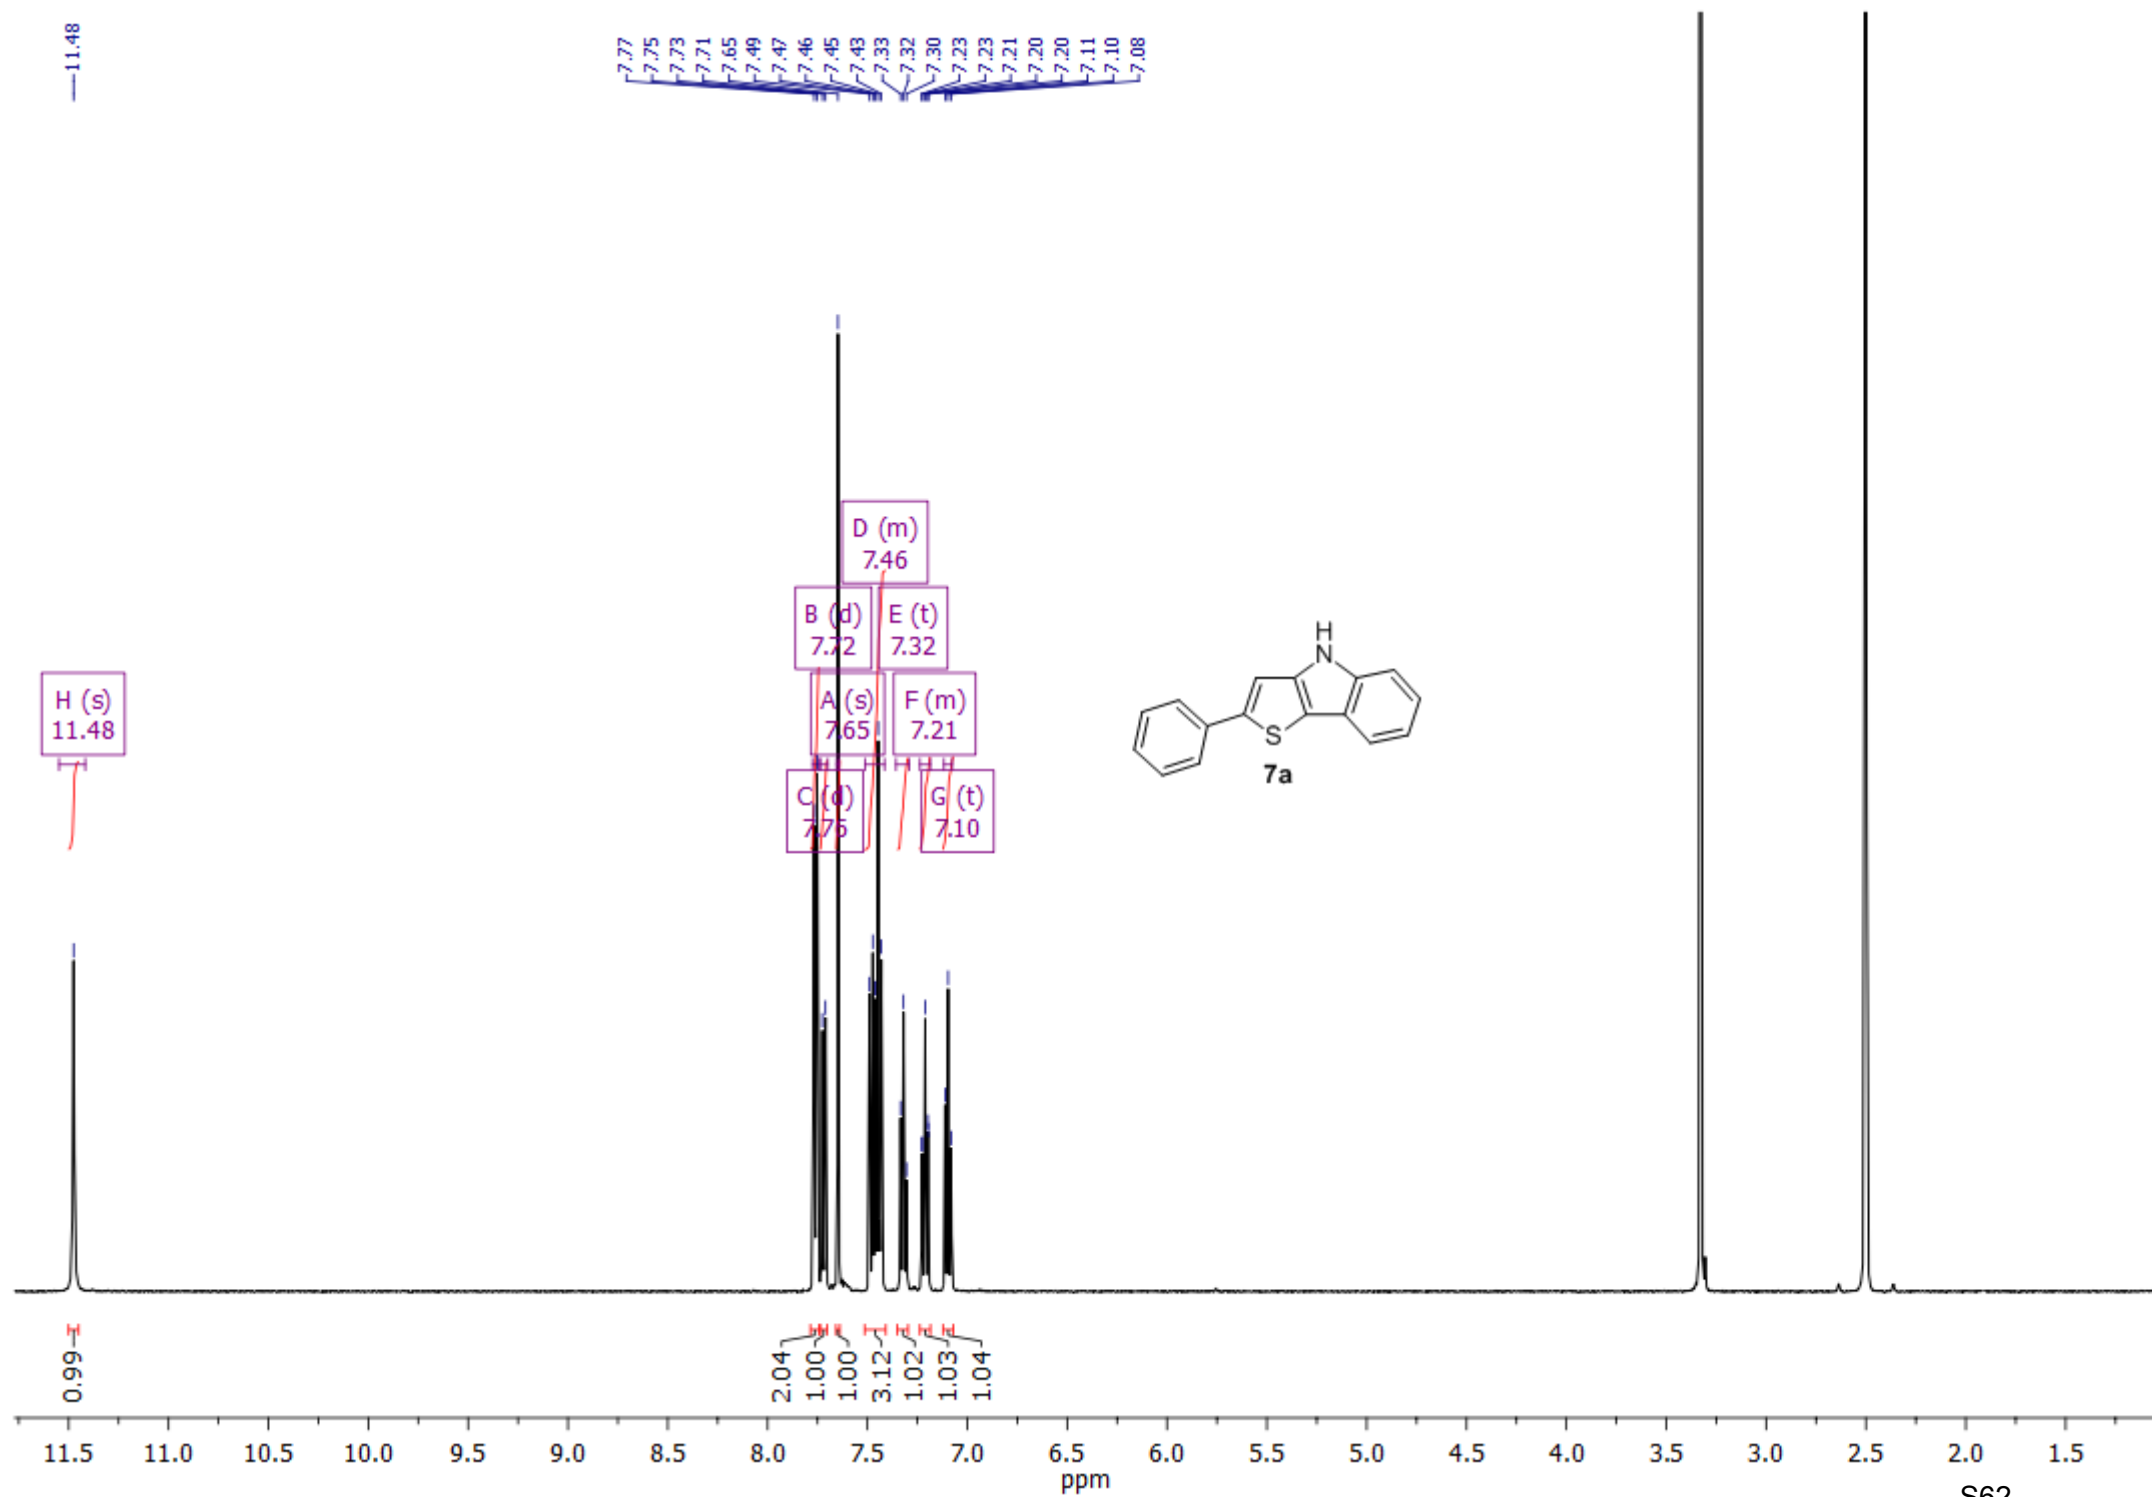

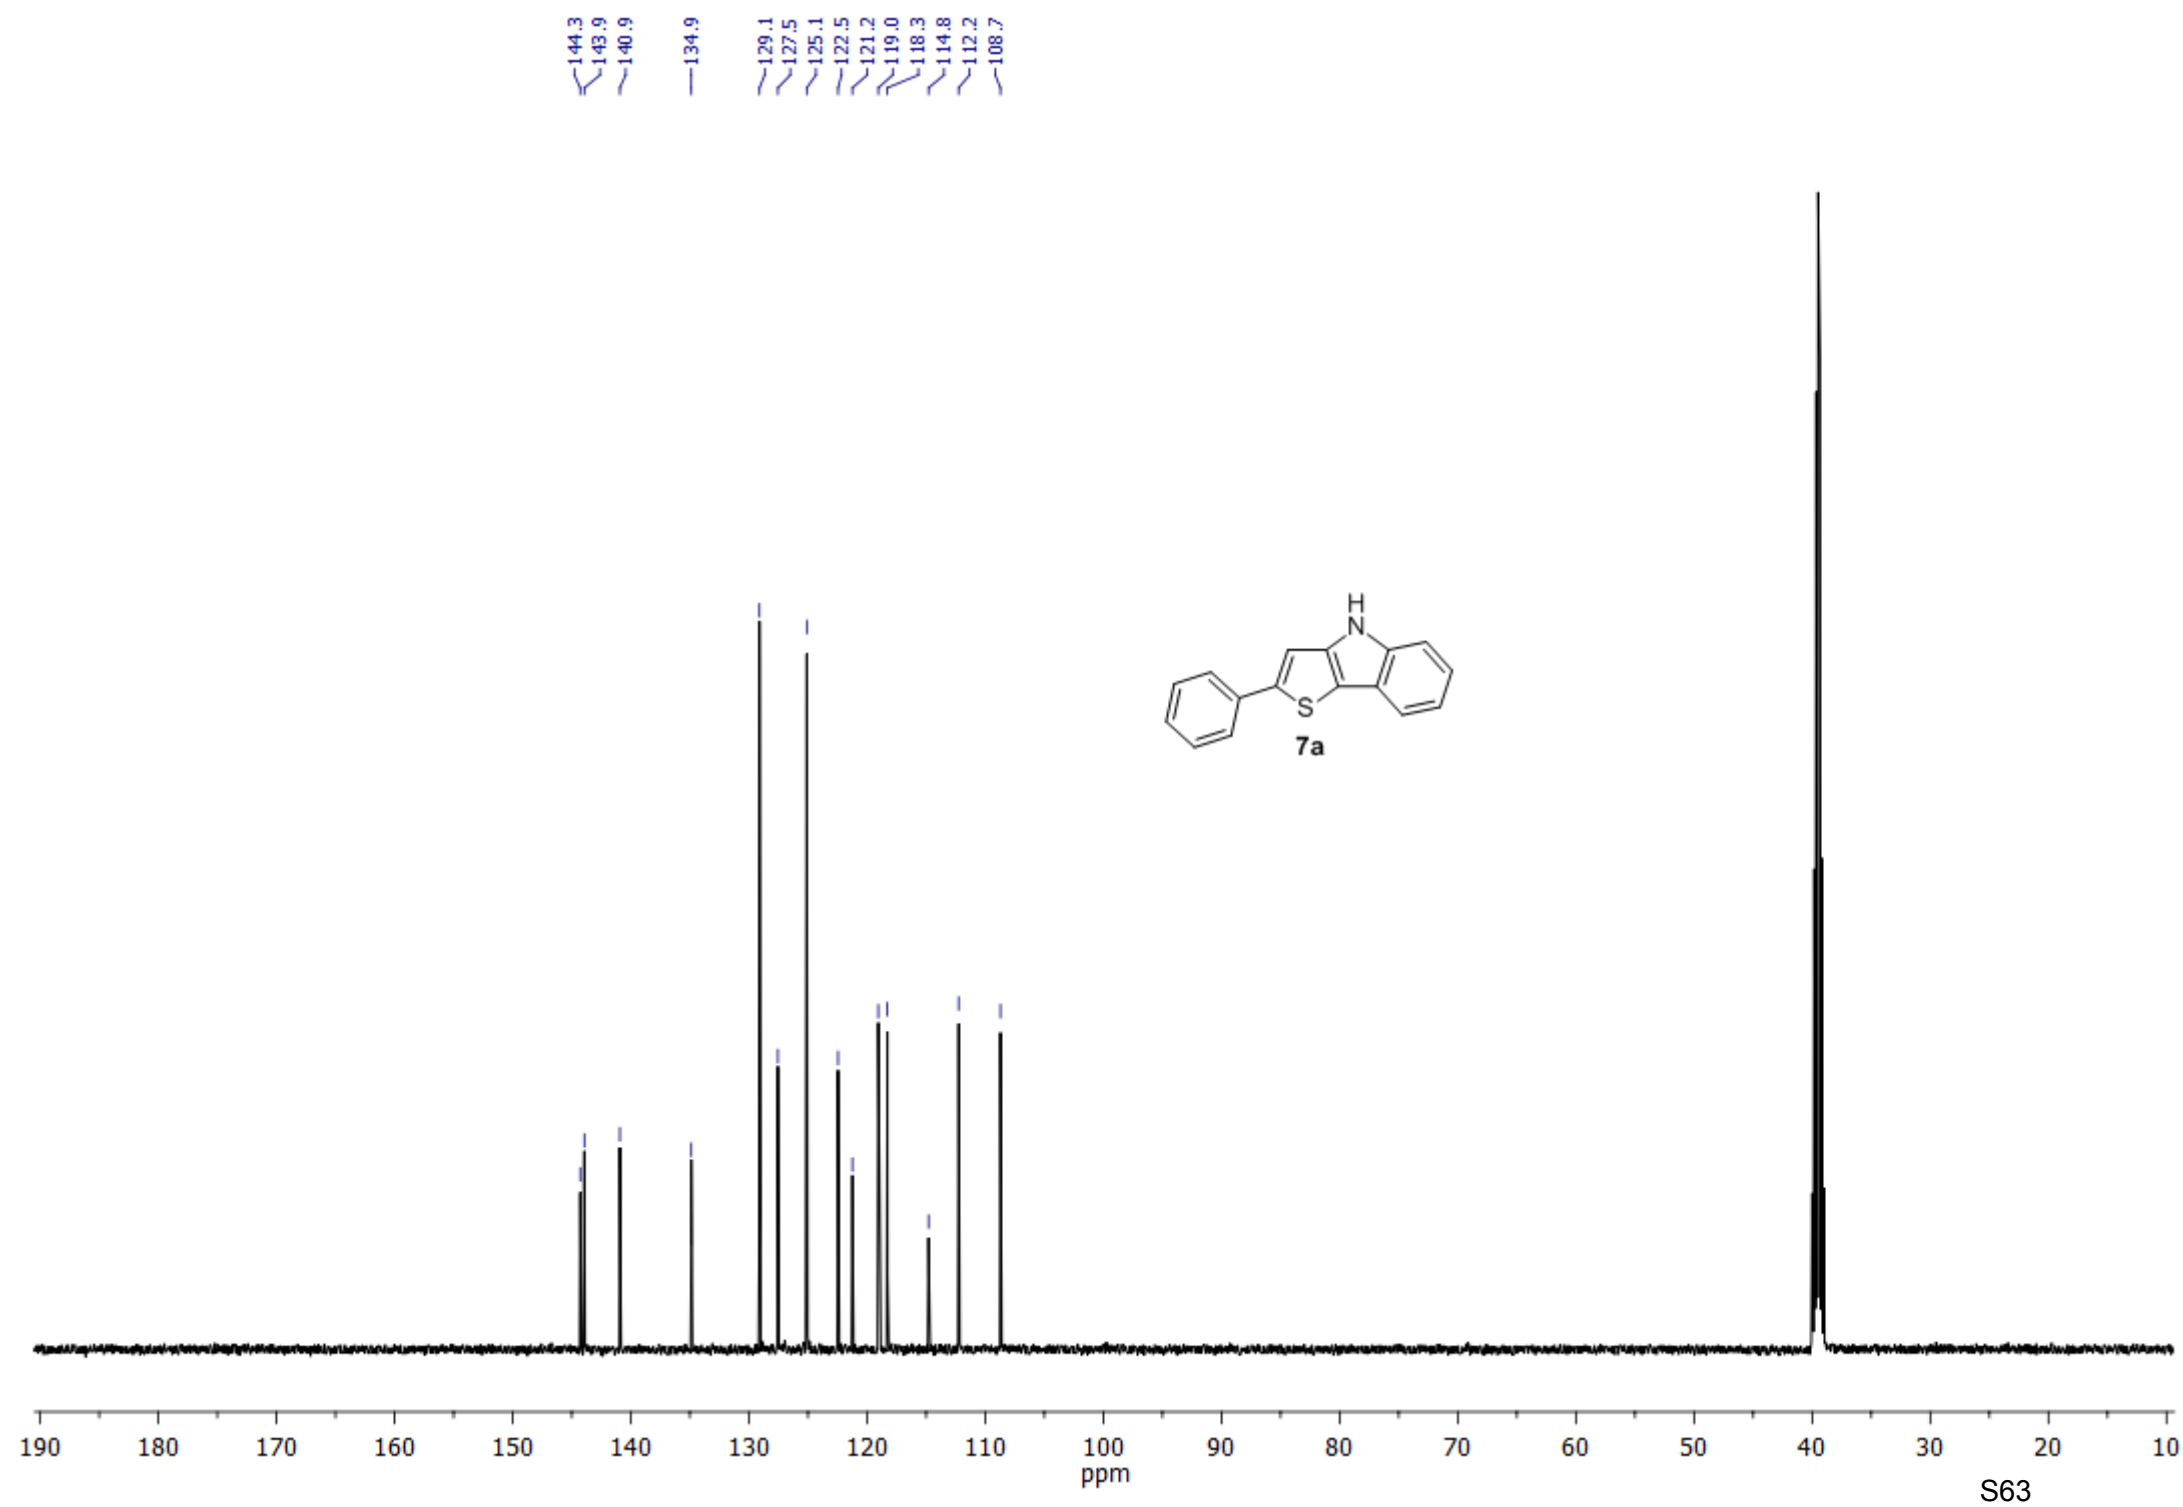

<sup>1</sup>H NMR (solvent: DMSO-*d*<sub>6</sub>)

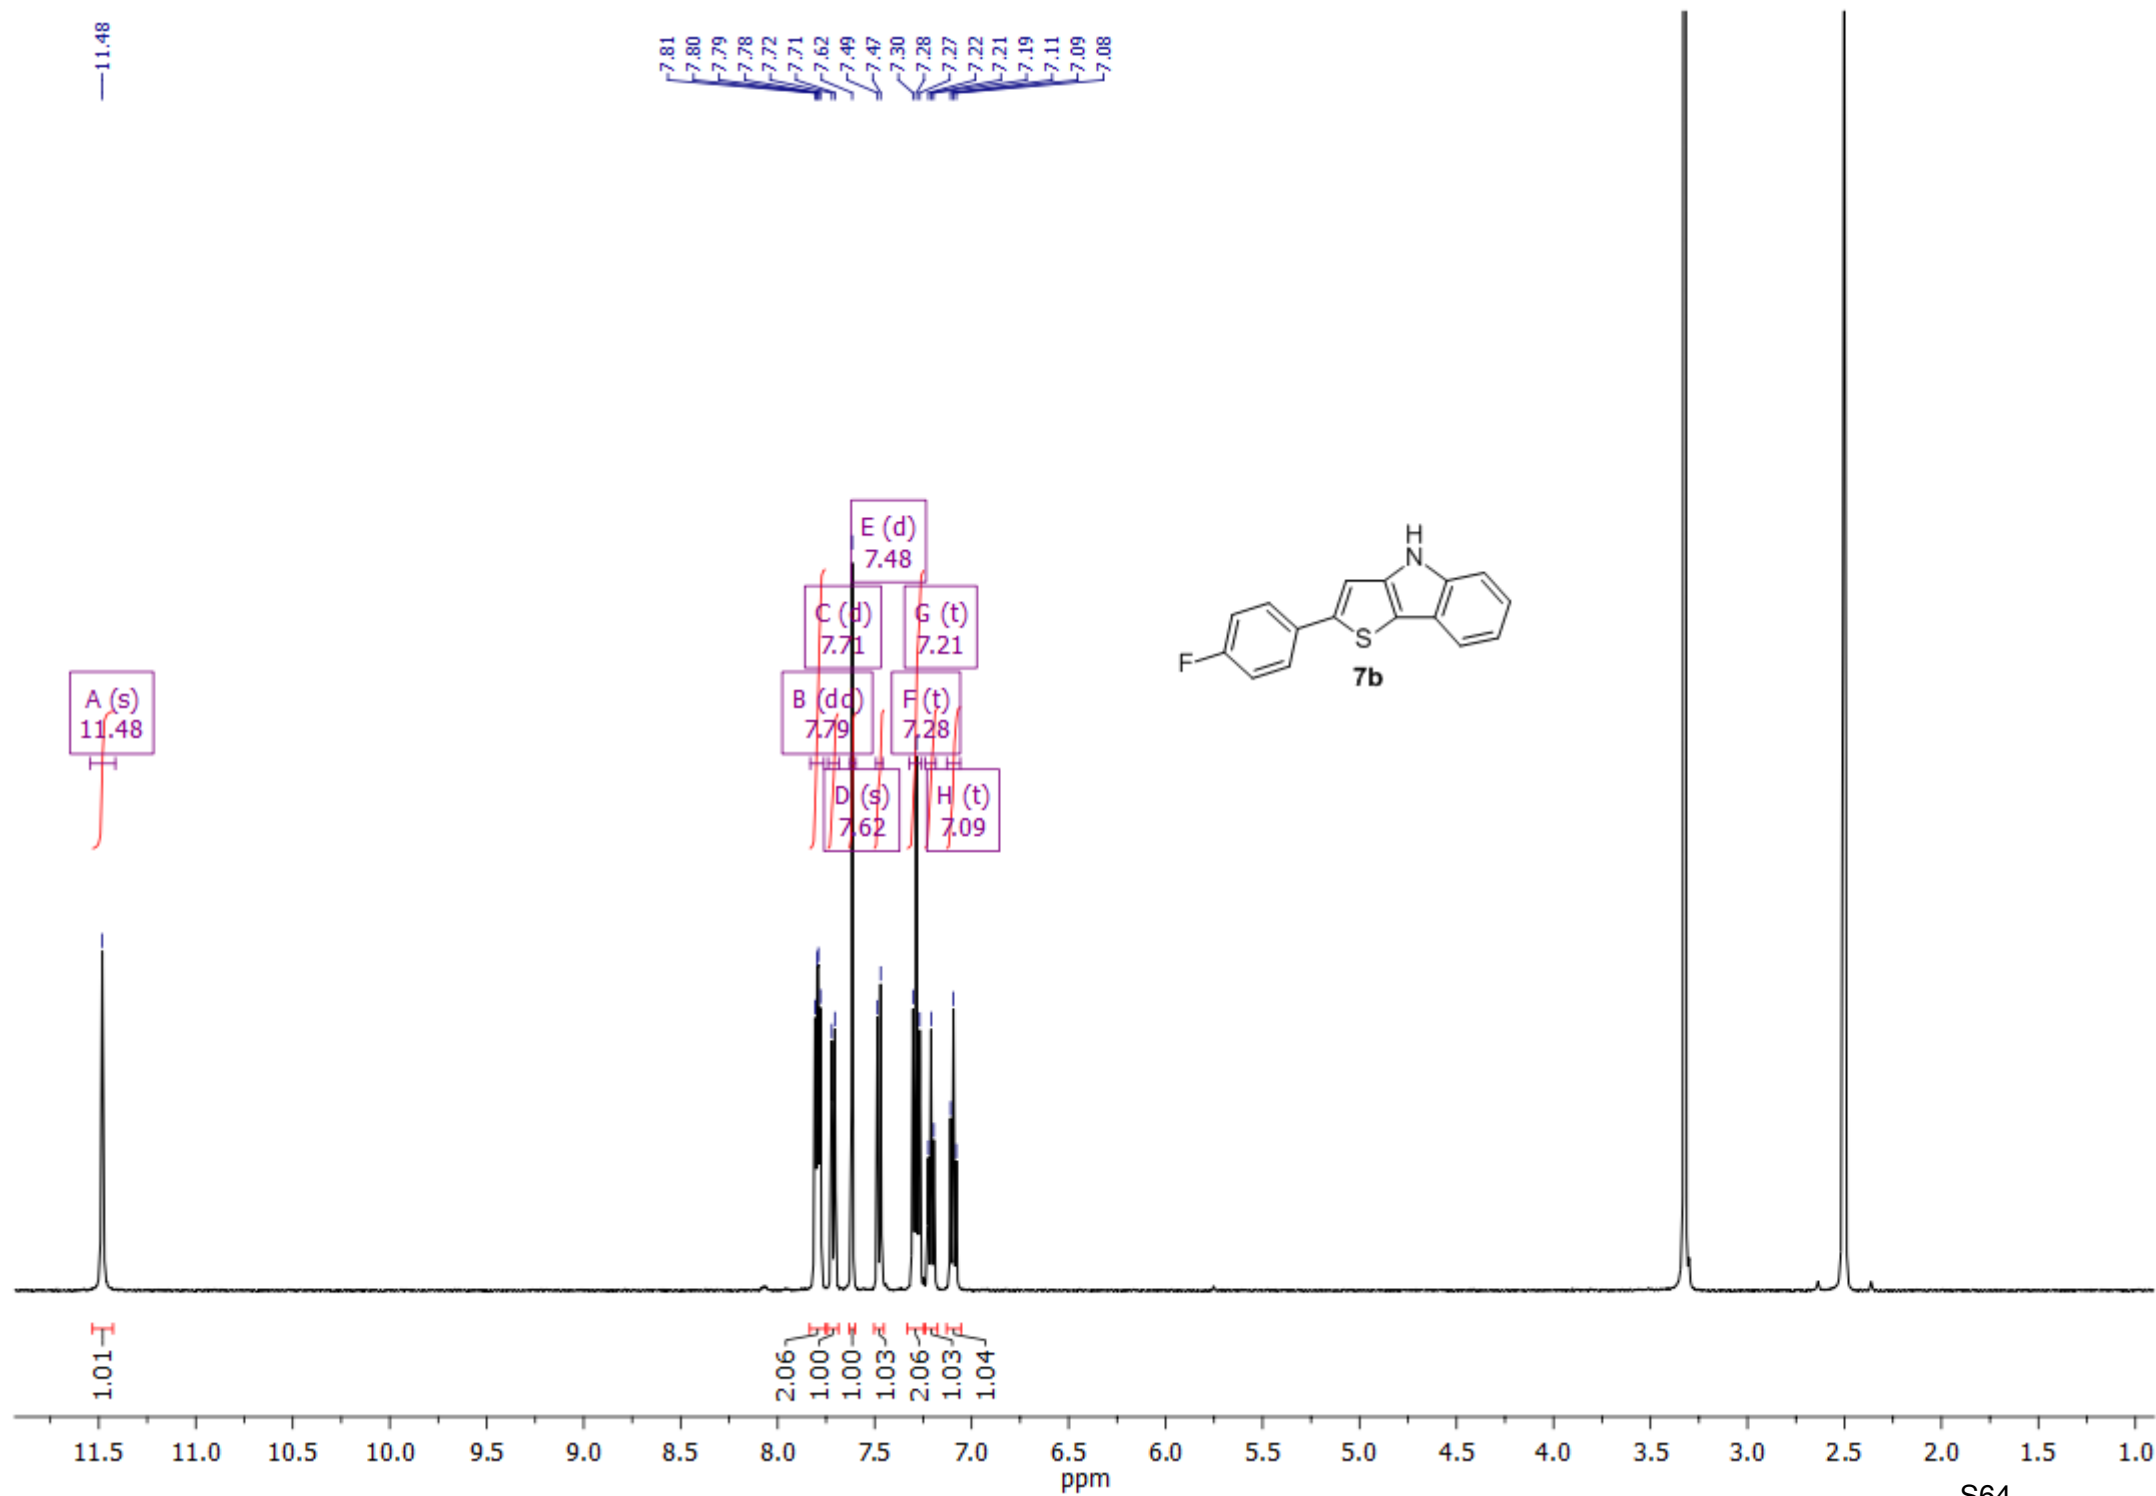



<sup>19</sup>F NMR (solvent: DMSO-*d*<sub>6</sub>)

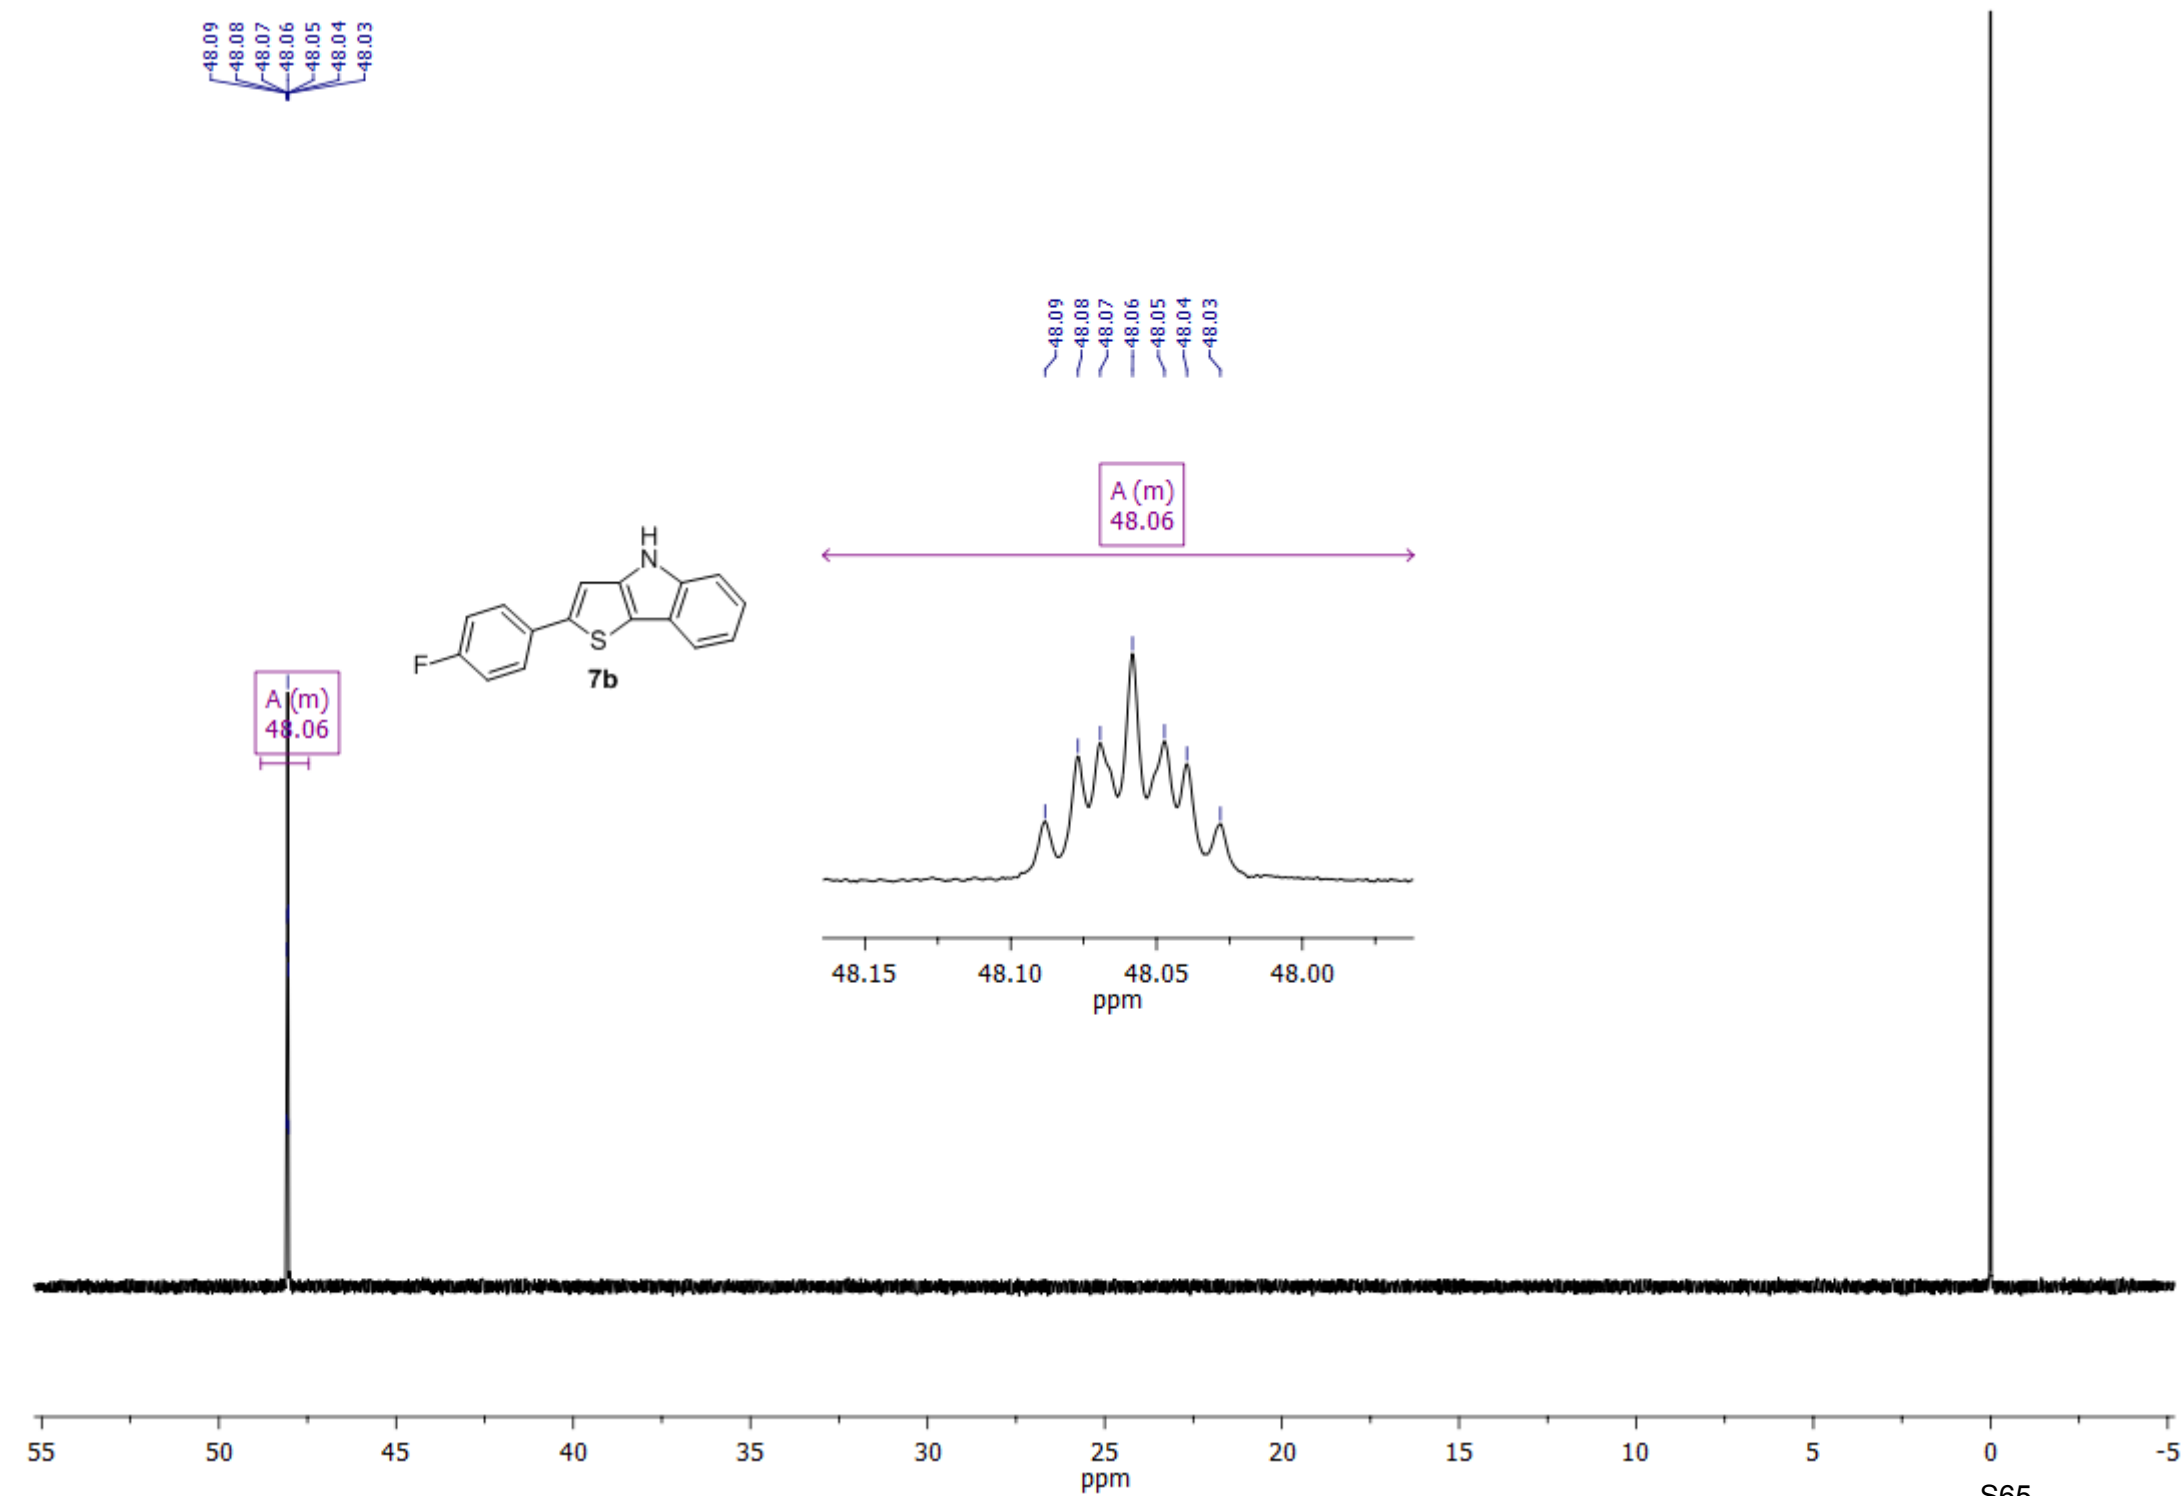

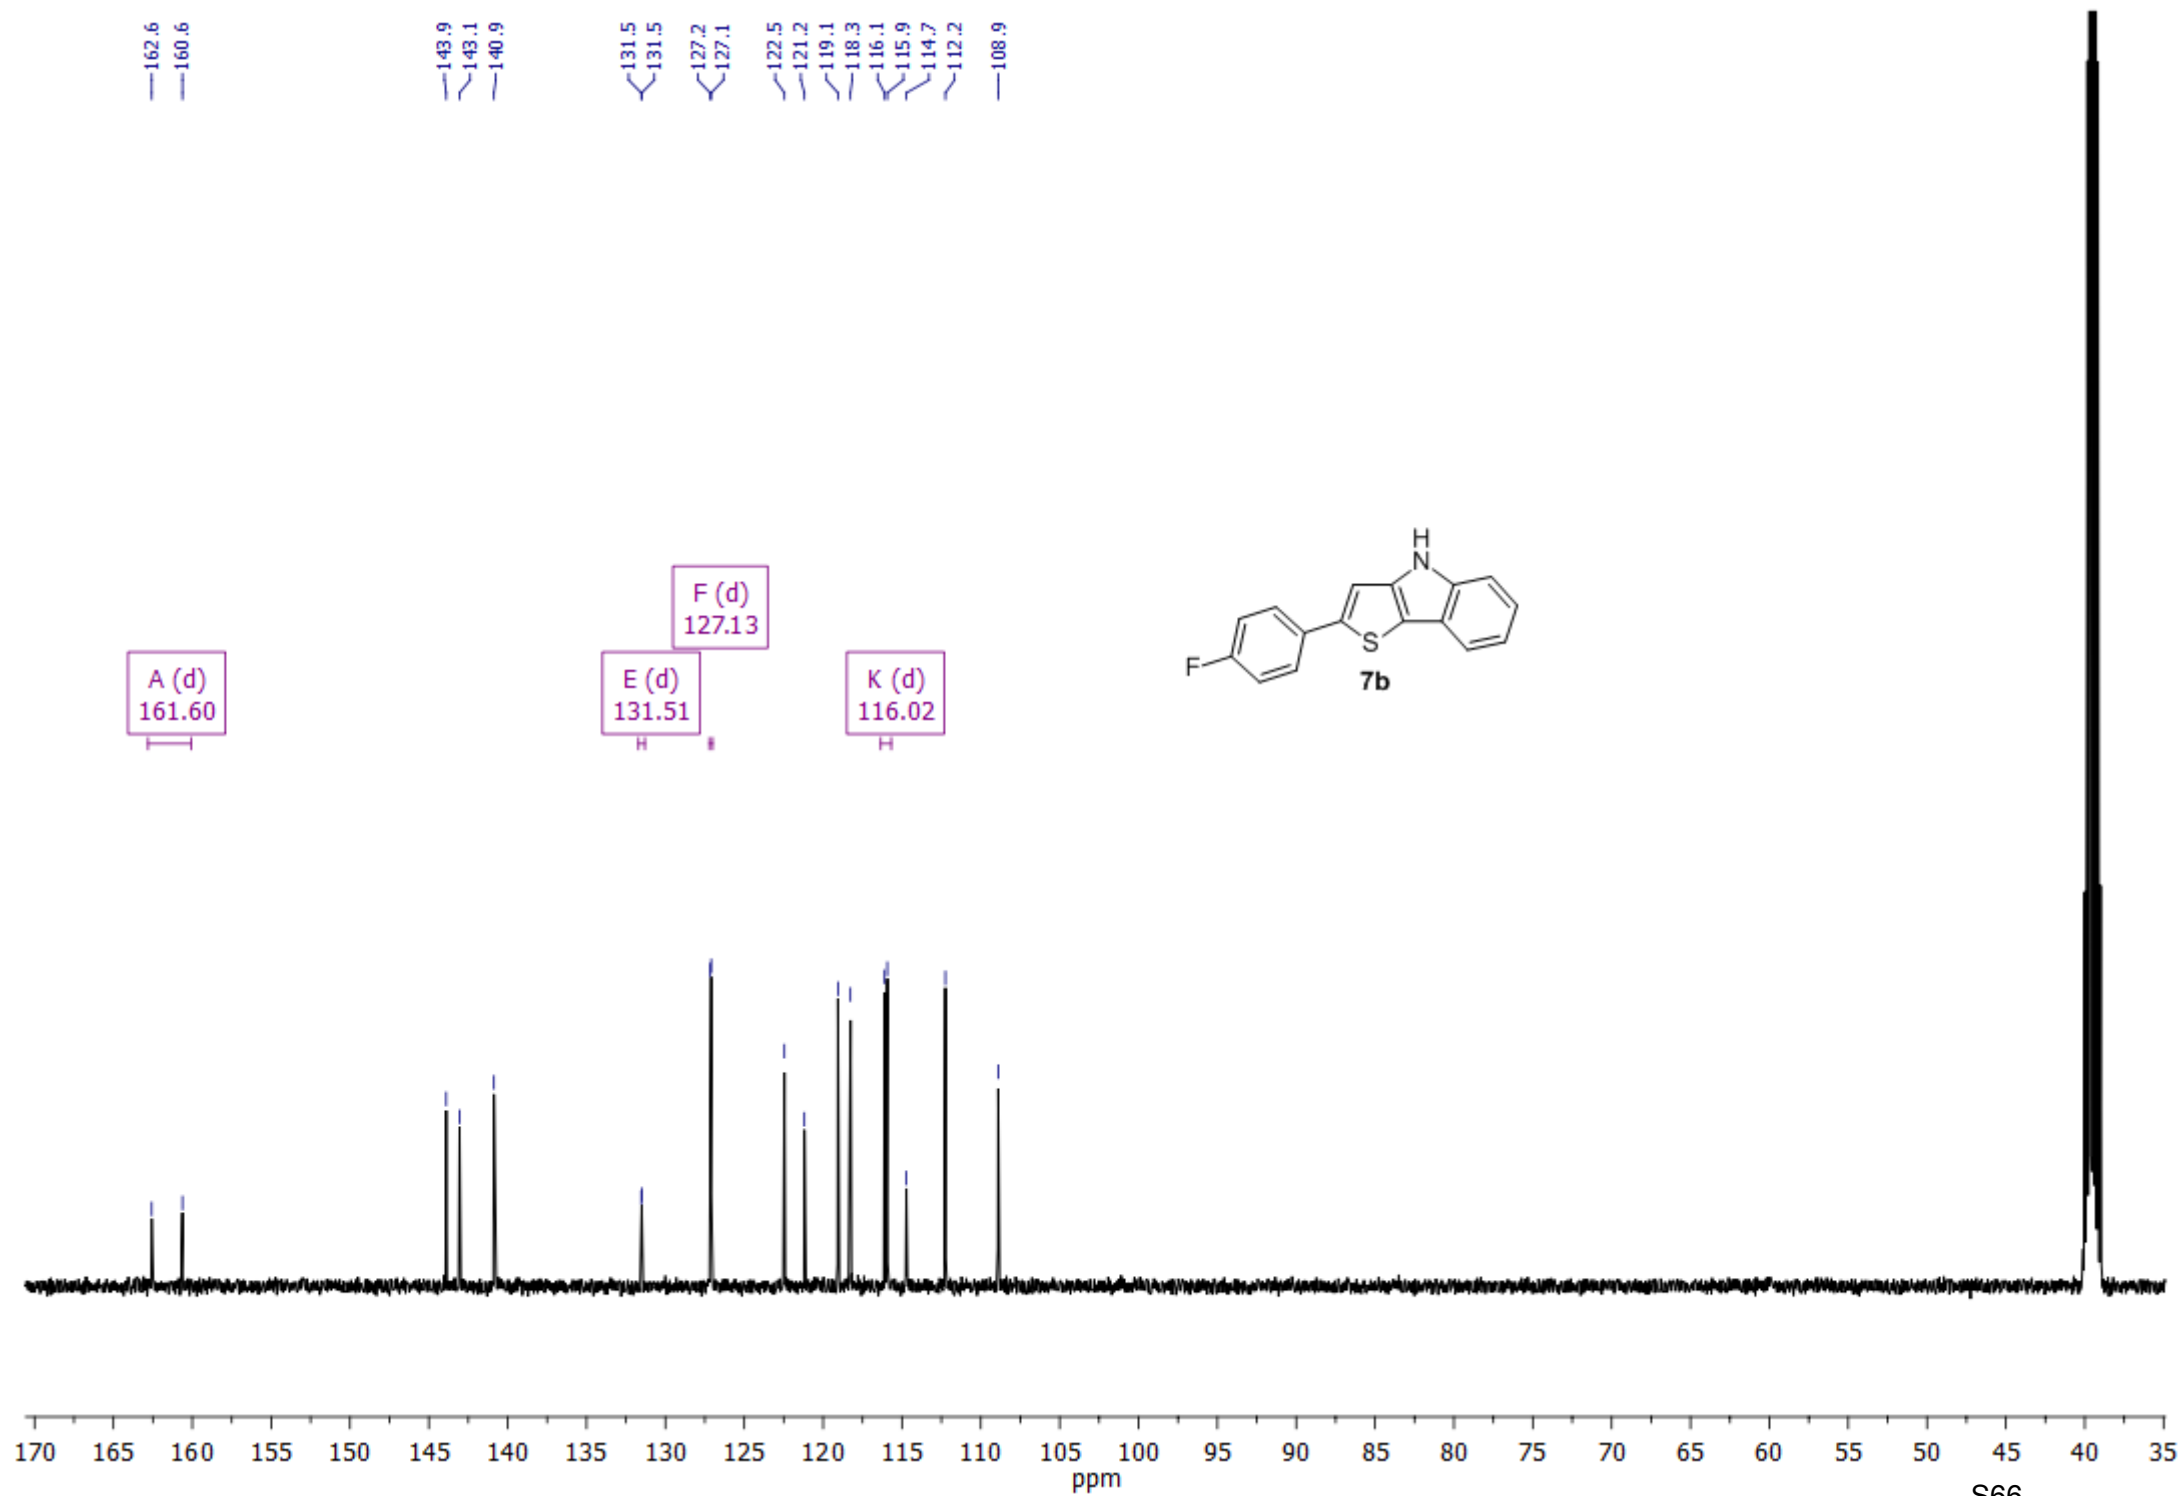

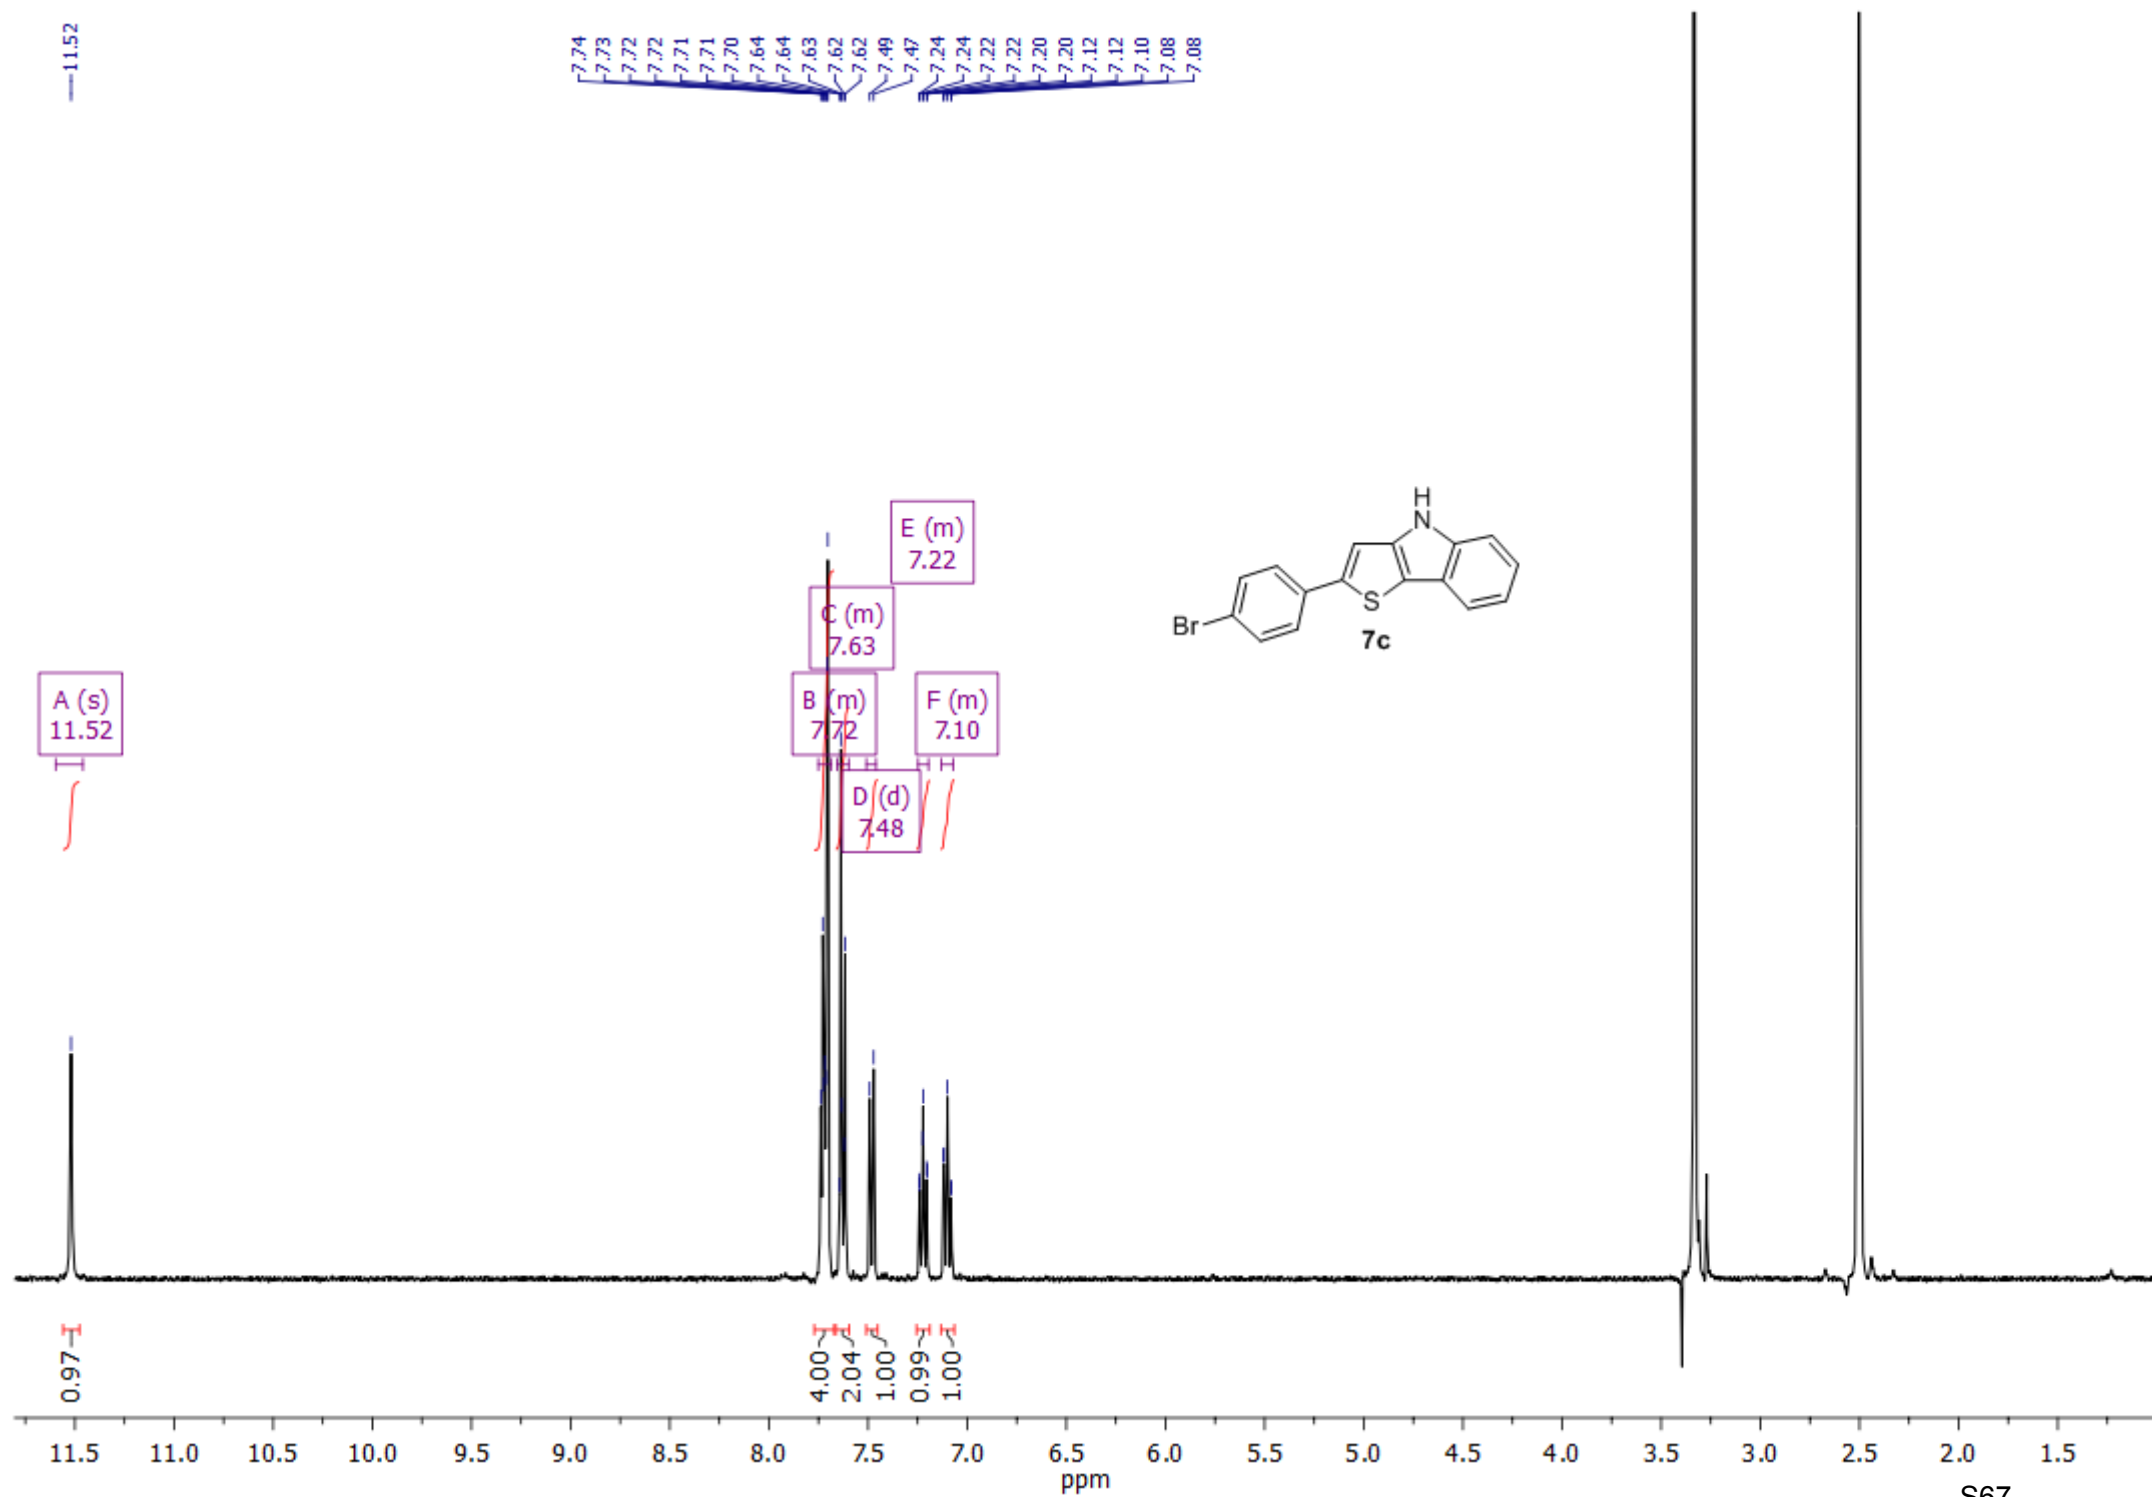

<sup>13</sup>C NMR (solvent: DMSO-*d*<sub>6</sub>)

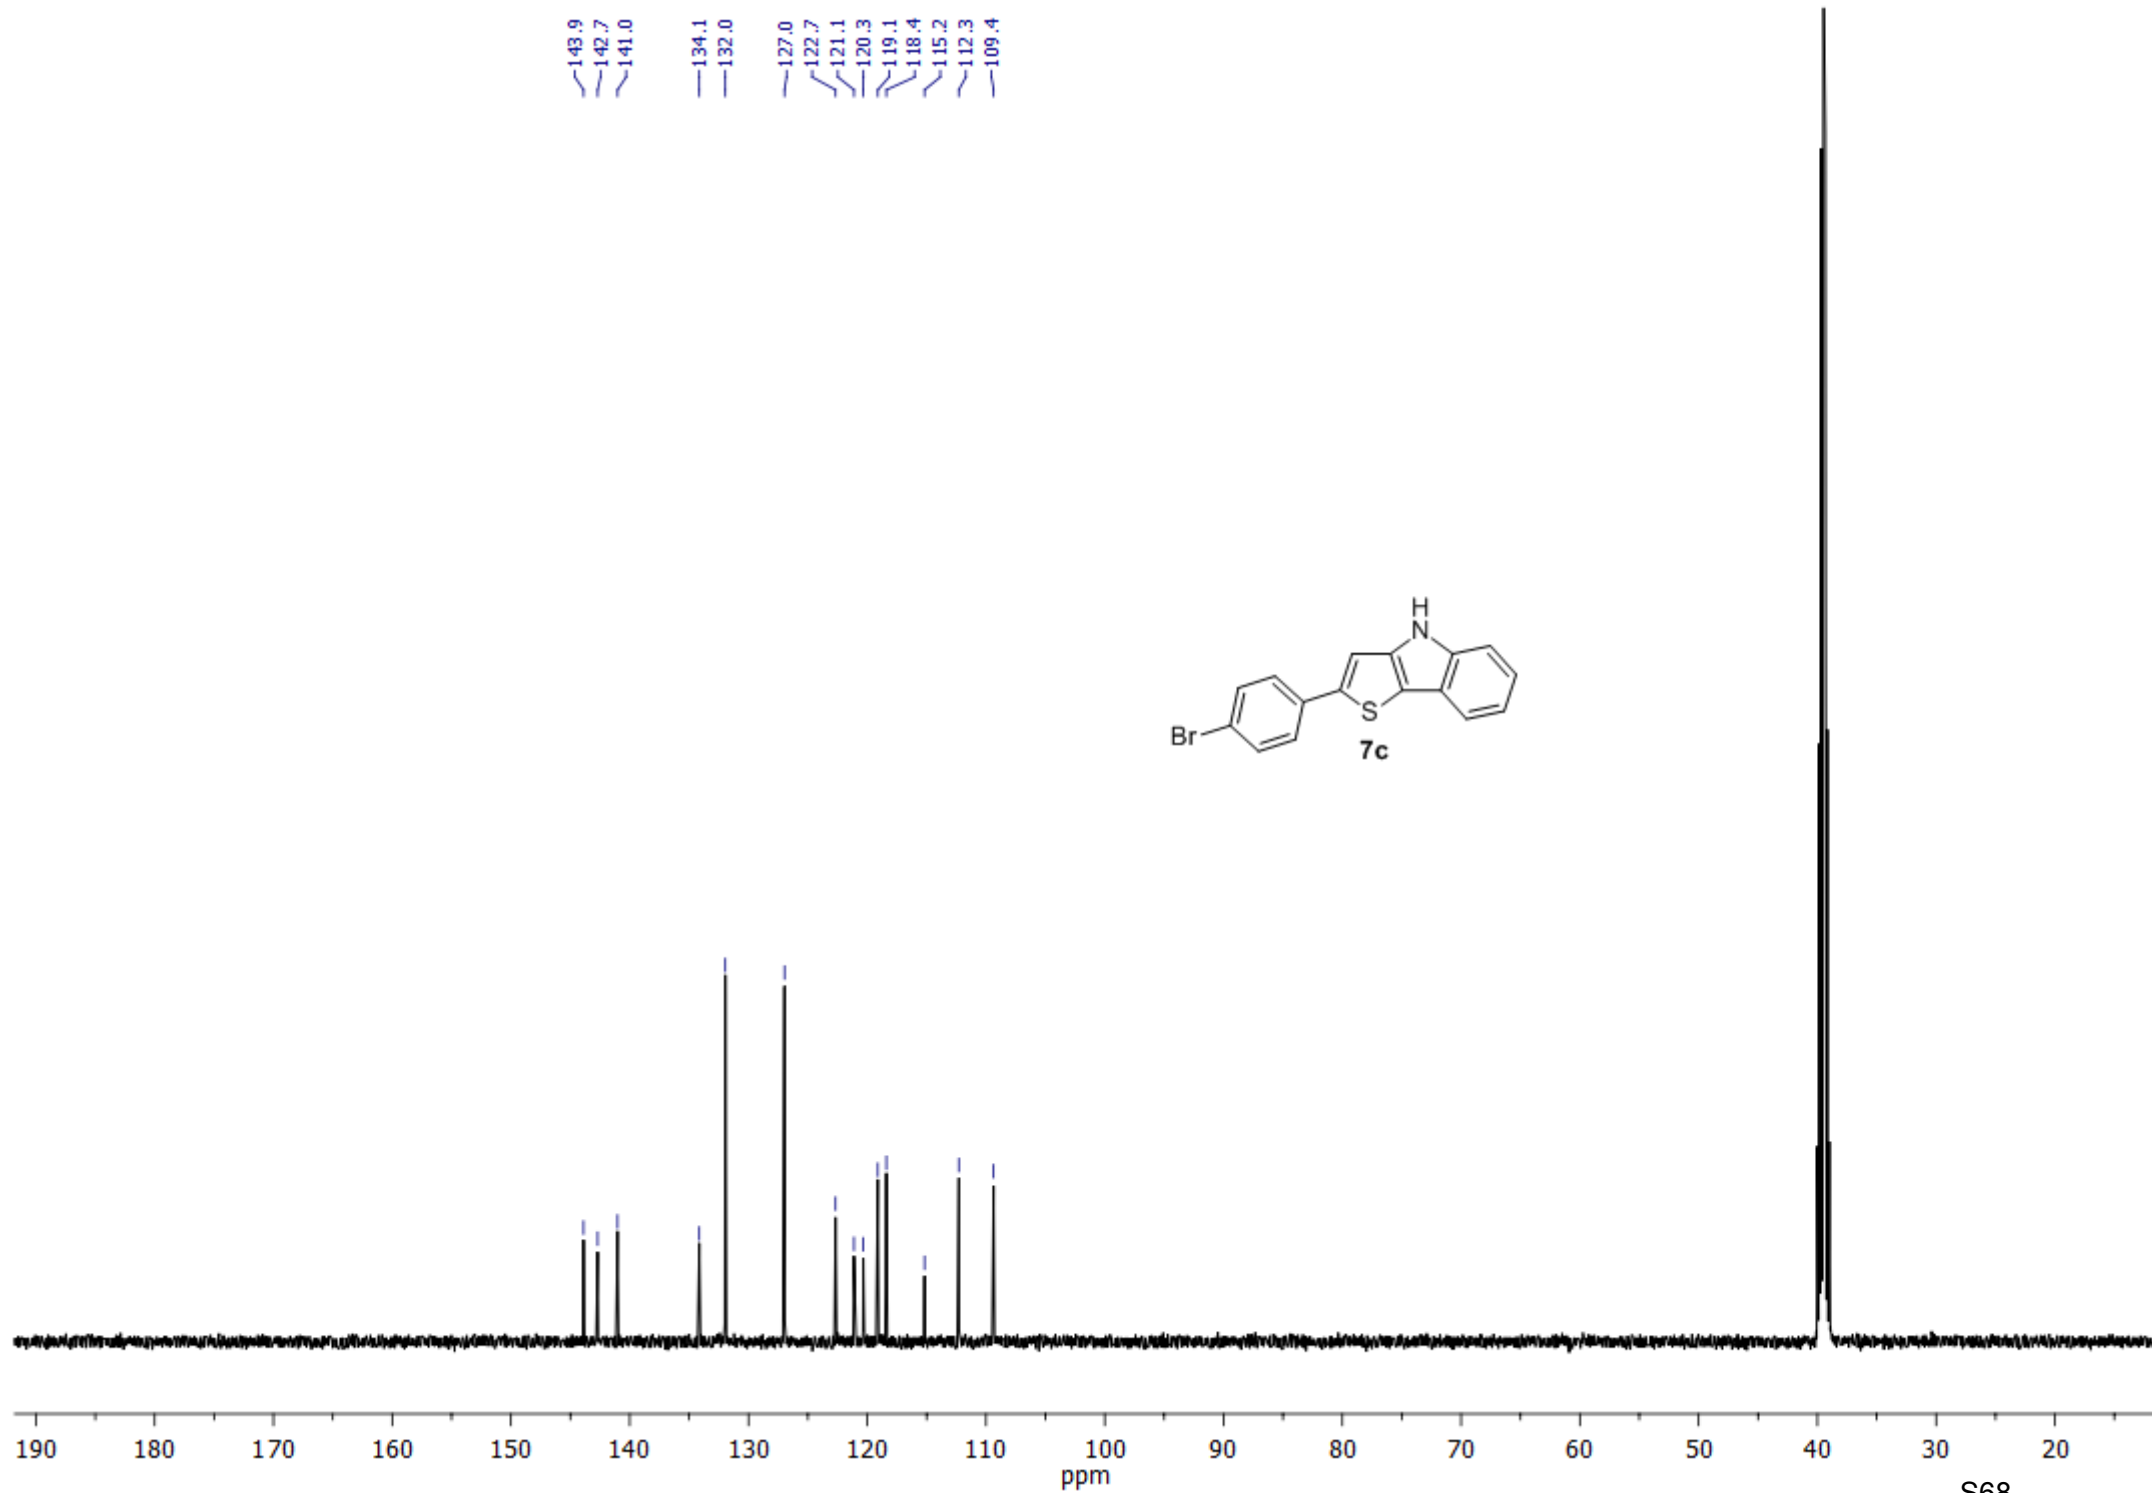

<sup>1</sup>H NMR (solvent: DMSO-*d*<sub>6</sub>)

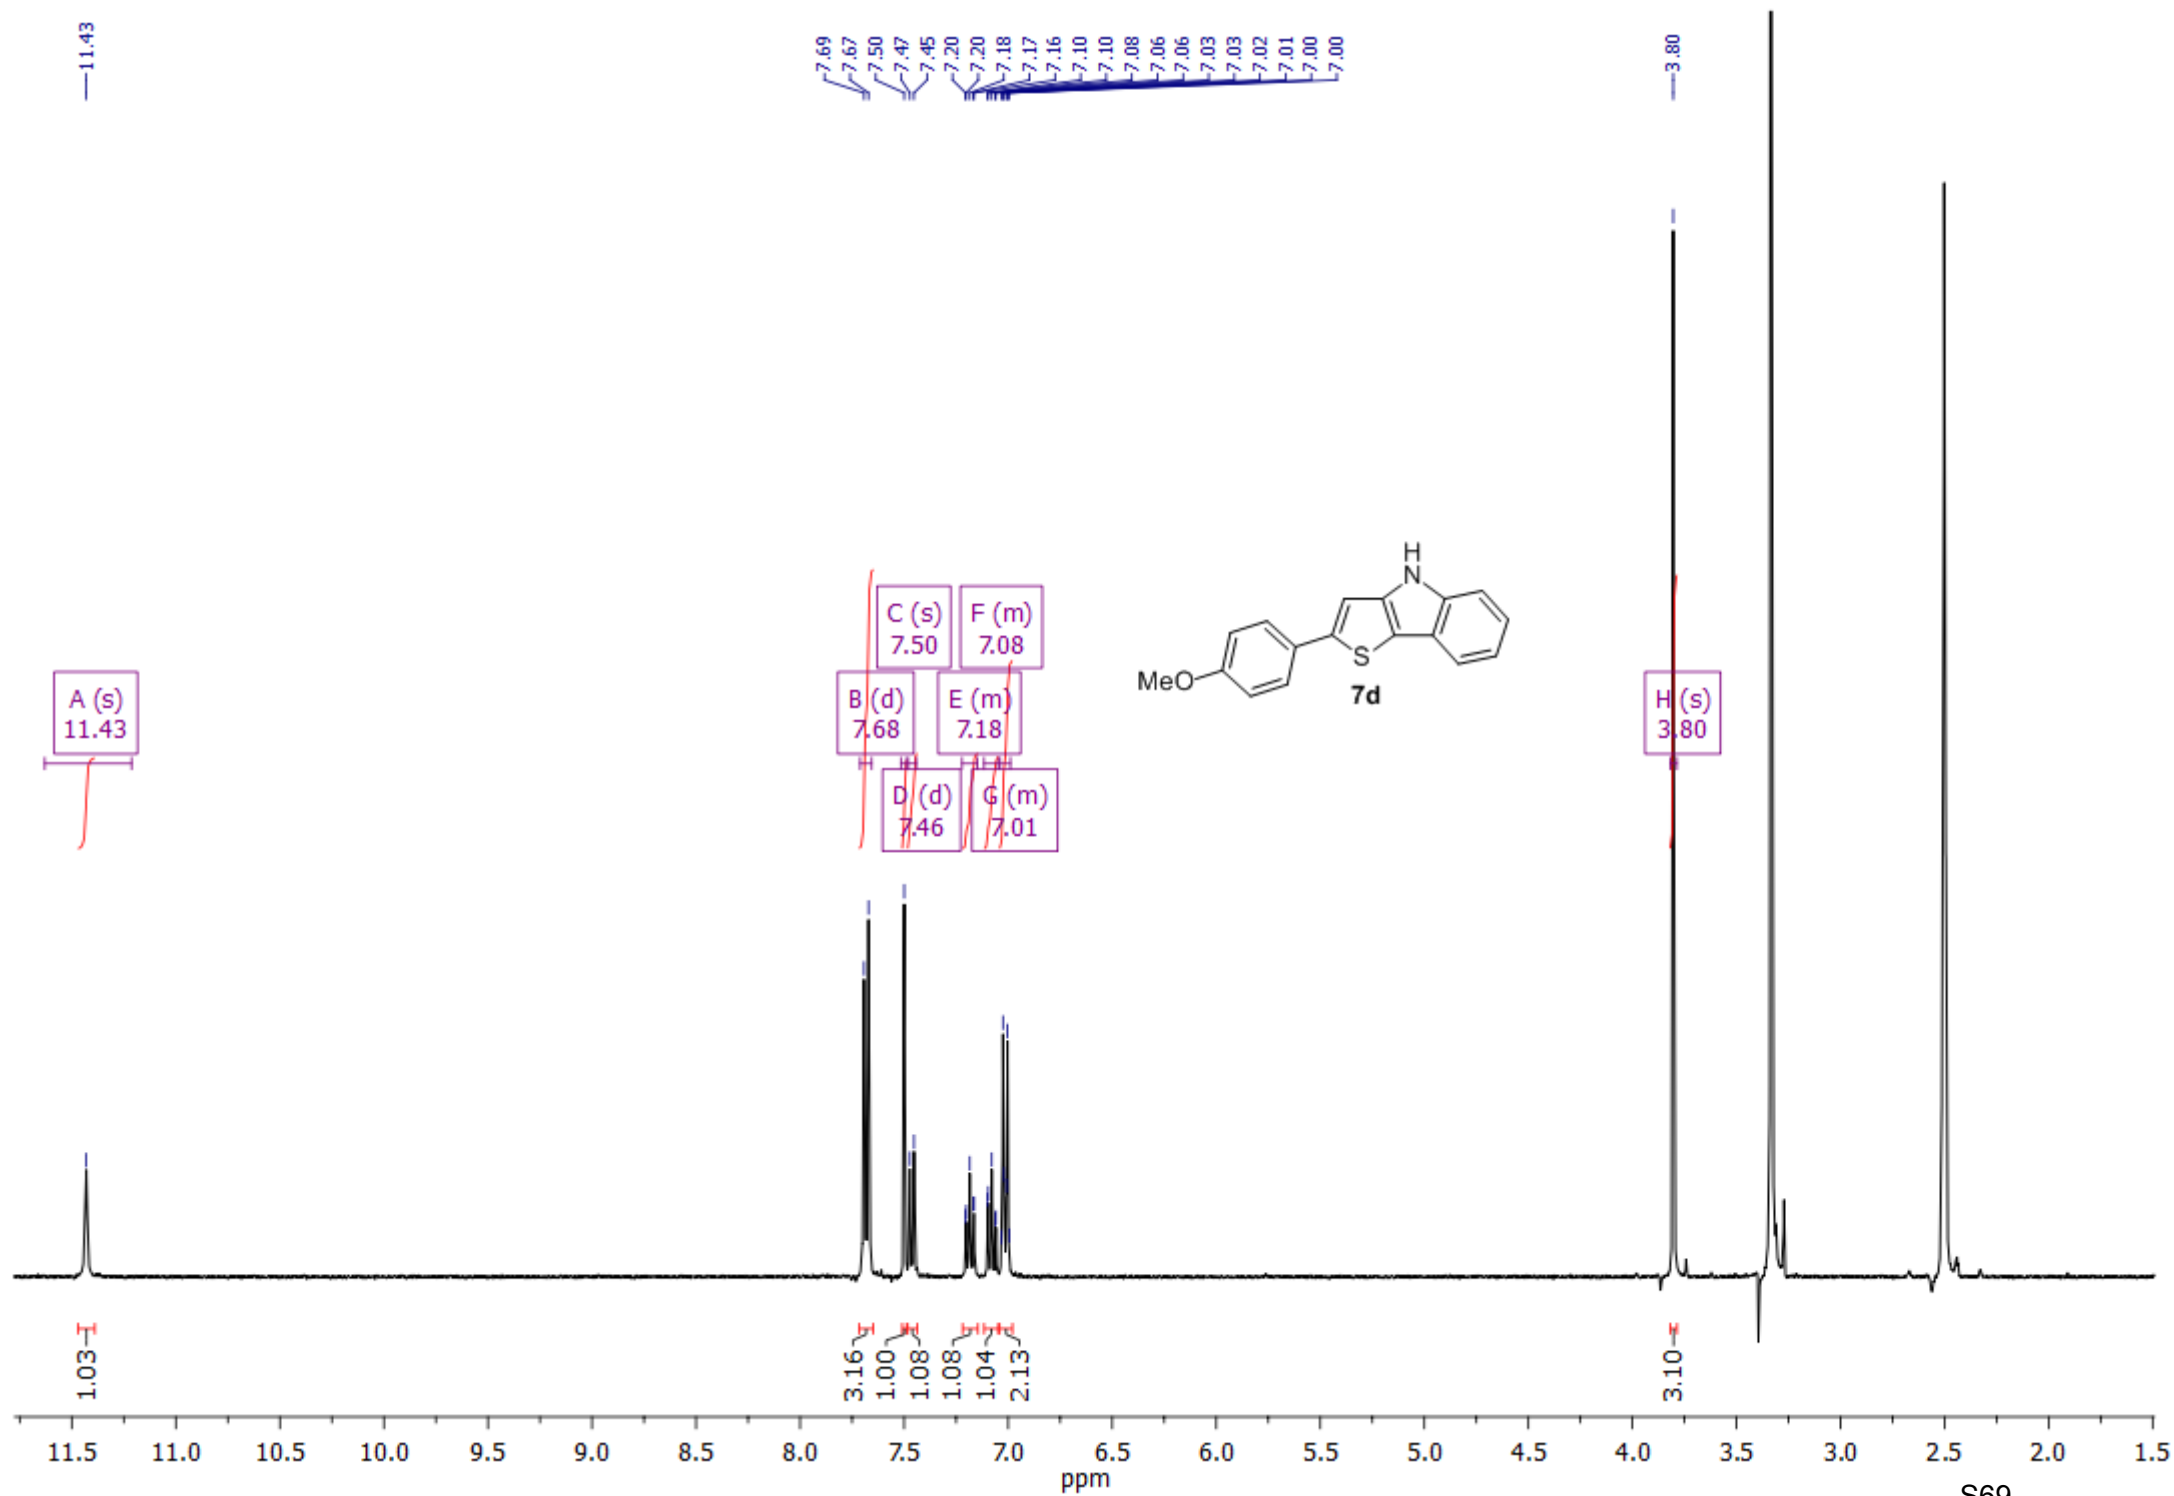

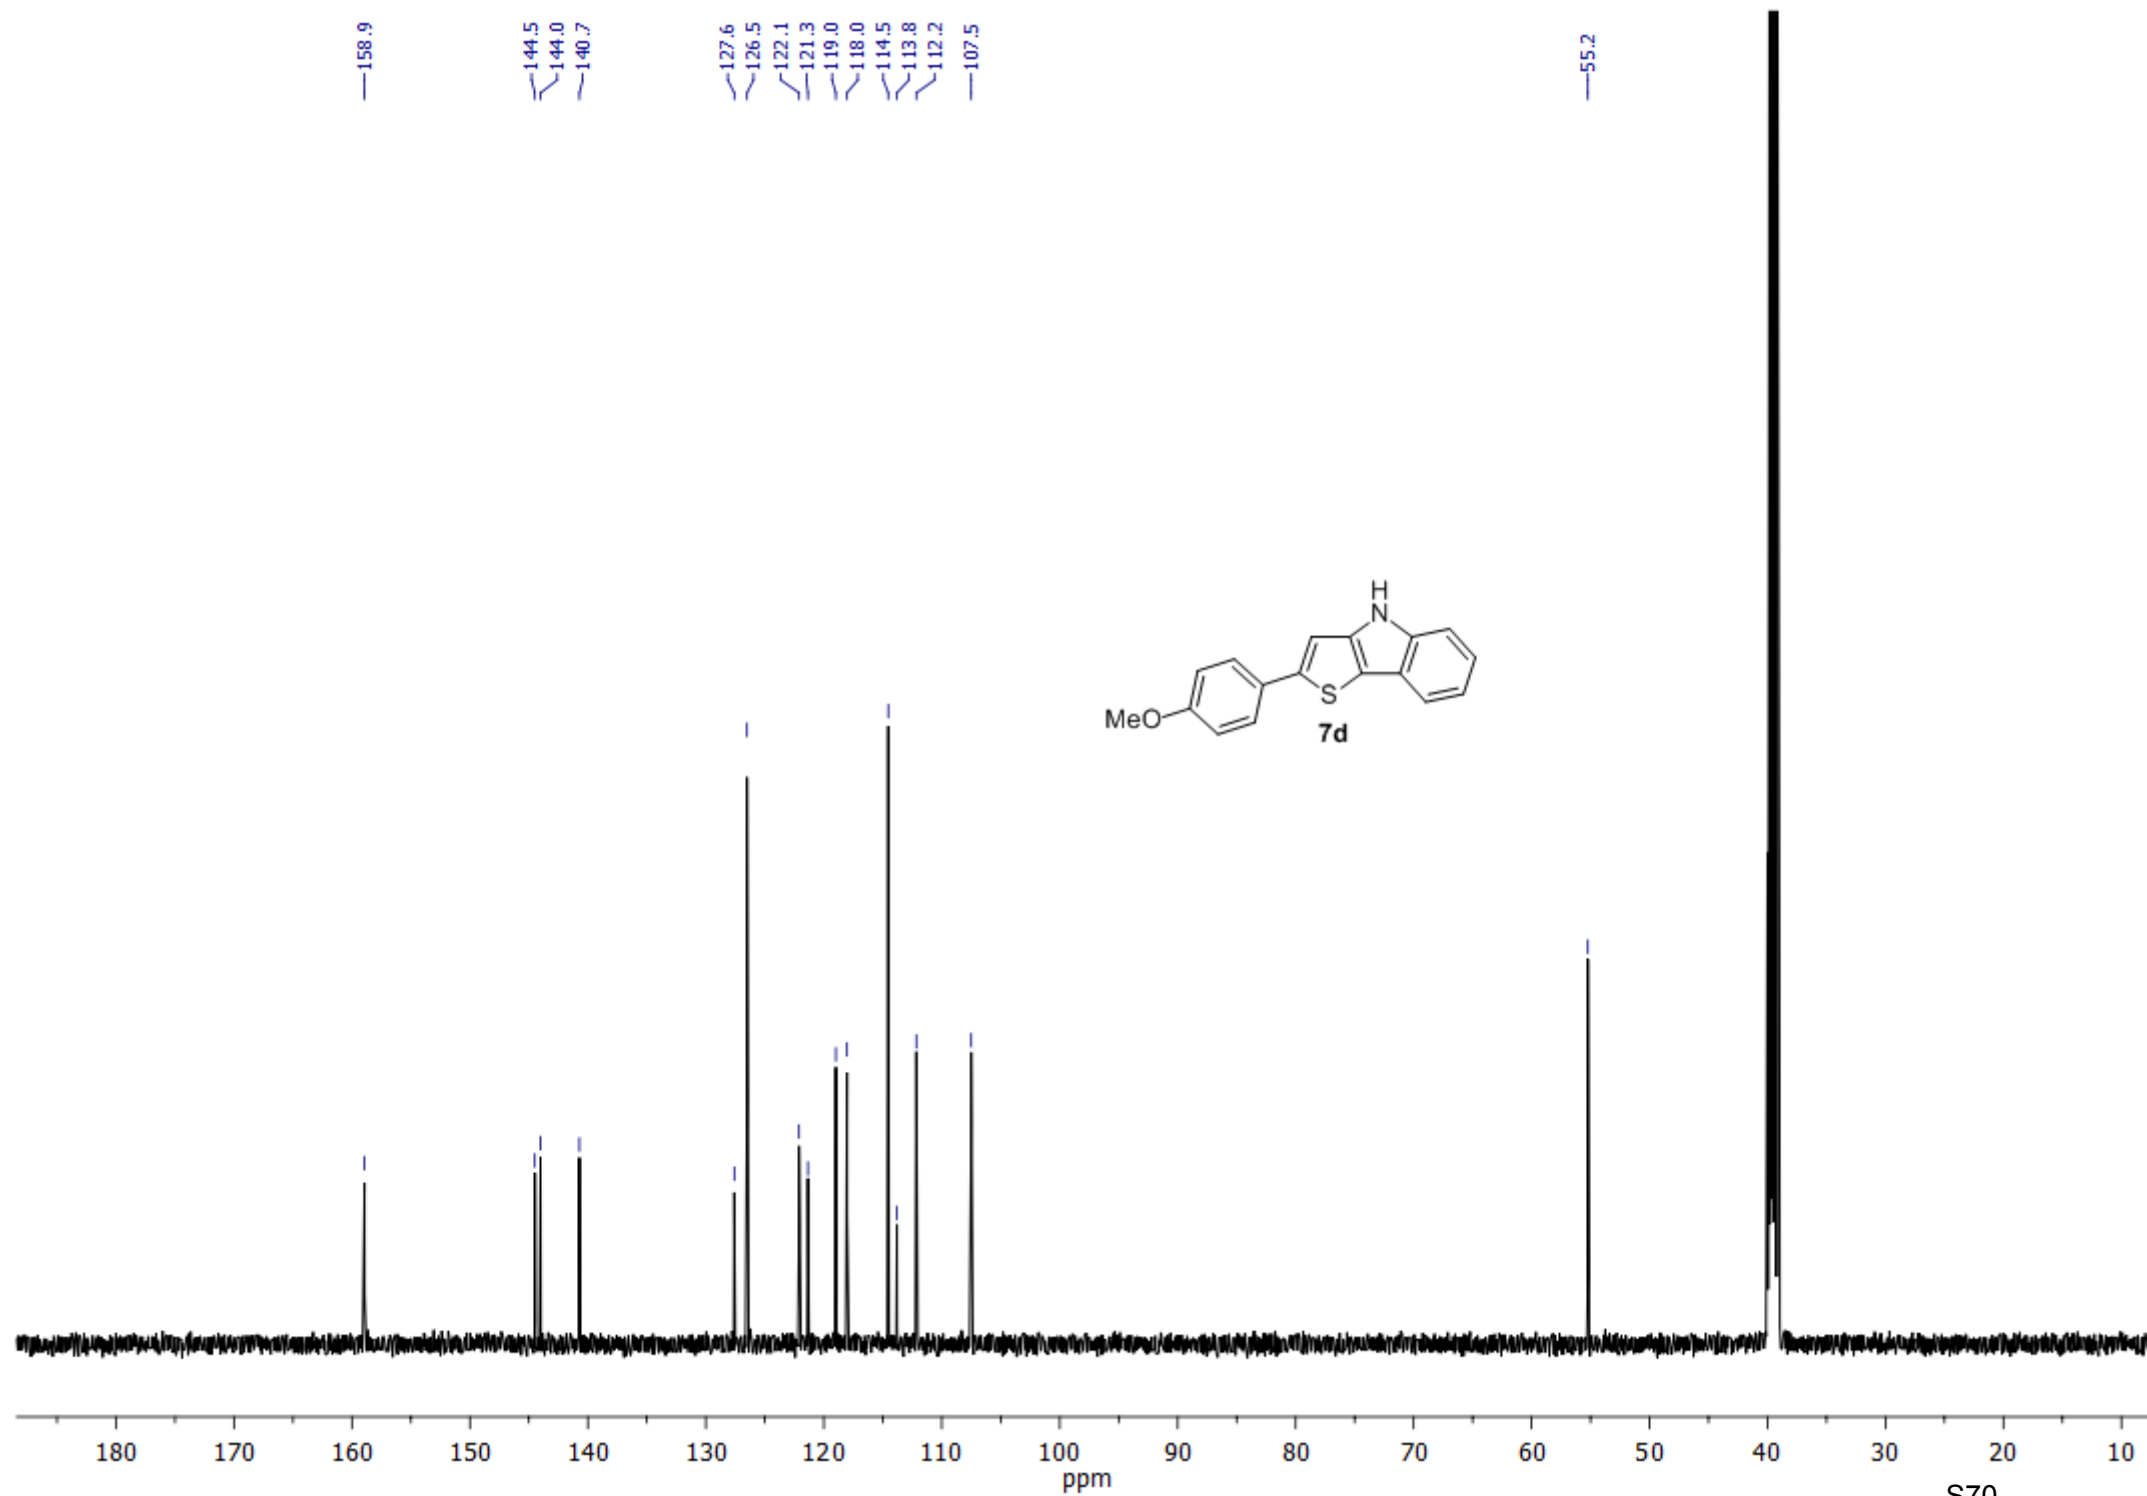

<sup>1</sup>H NMR (solvent: DMSO-*d*<sub>6</sub>)

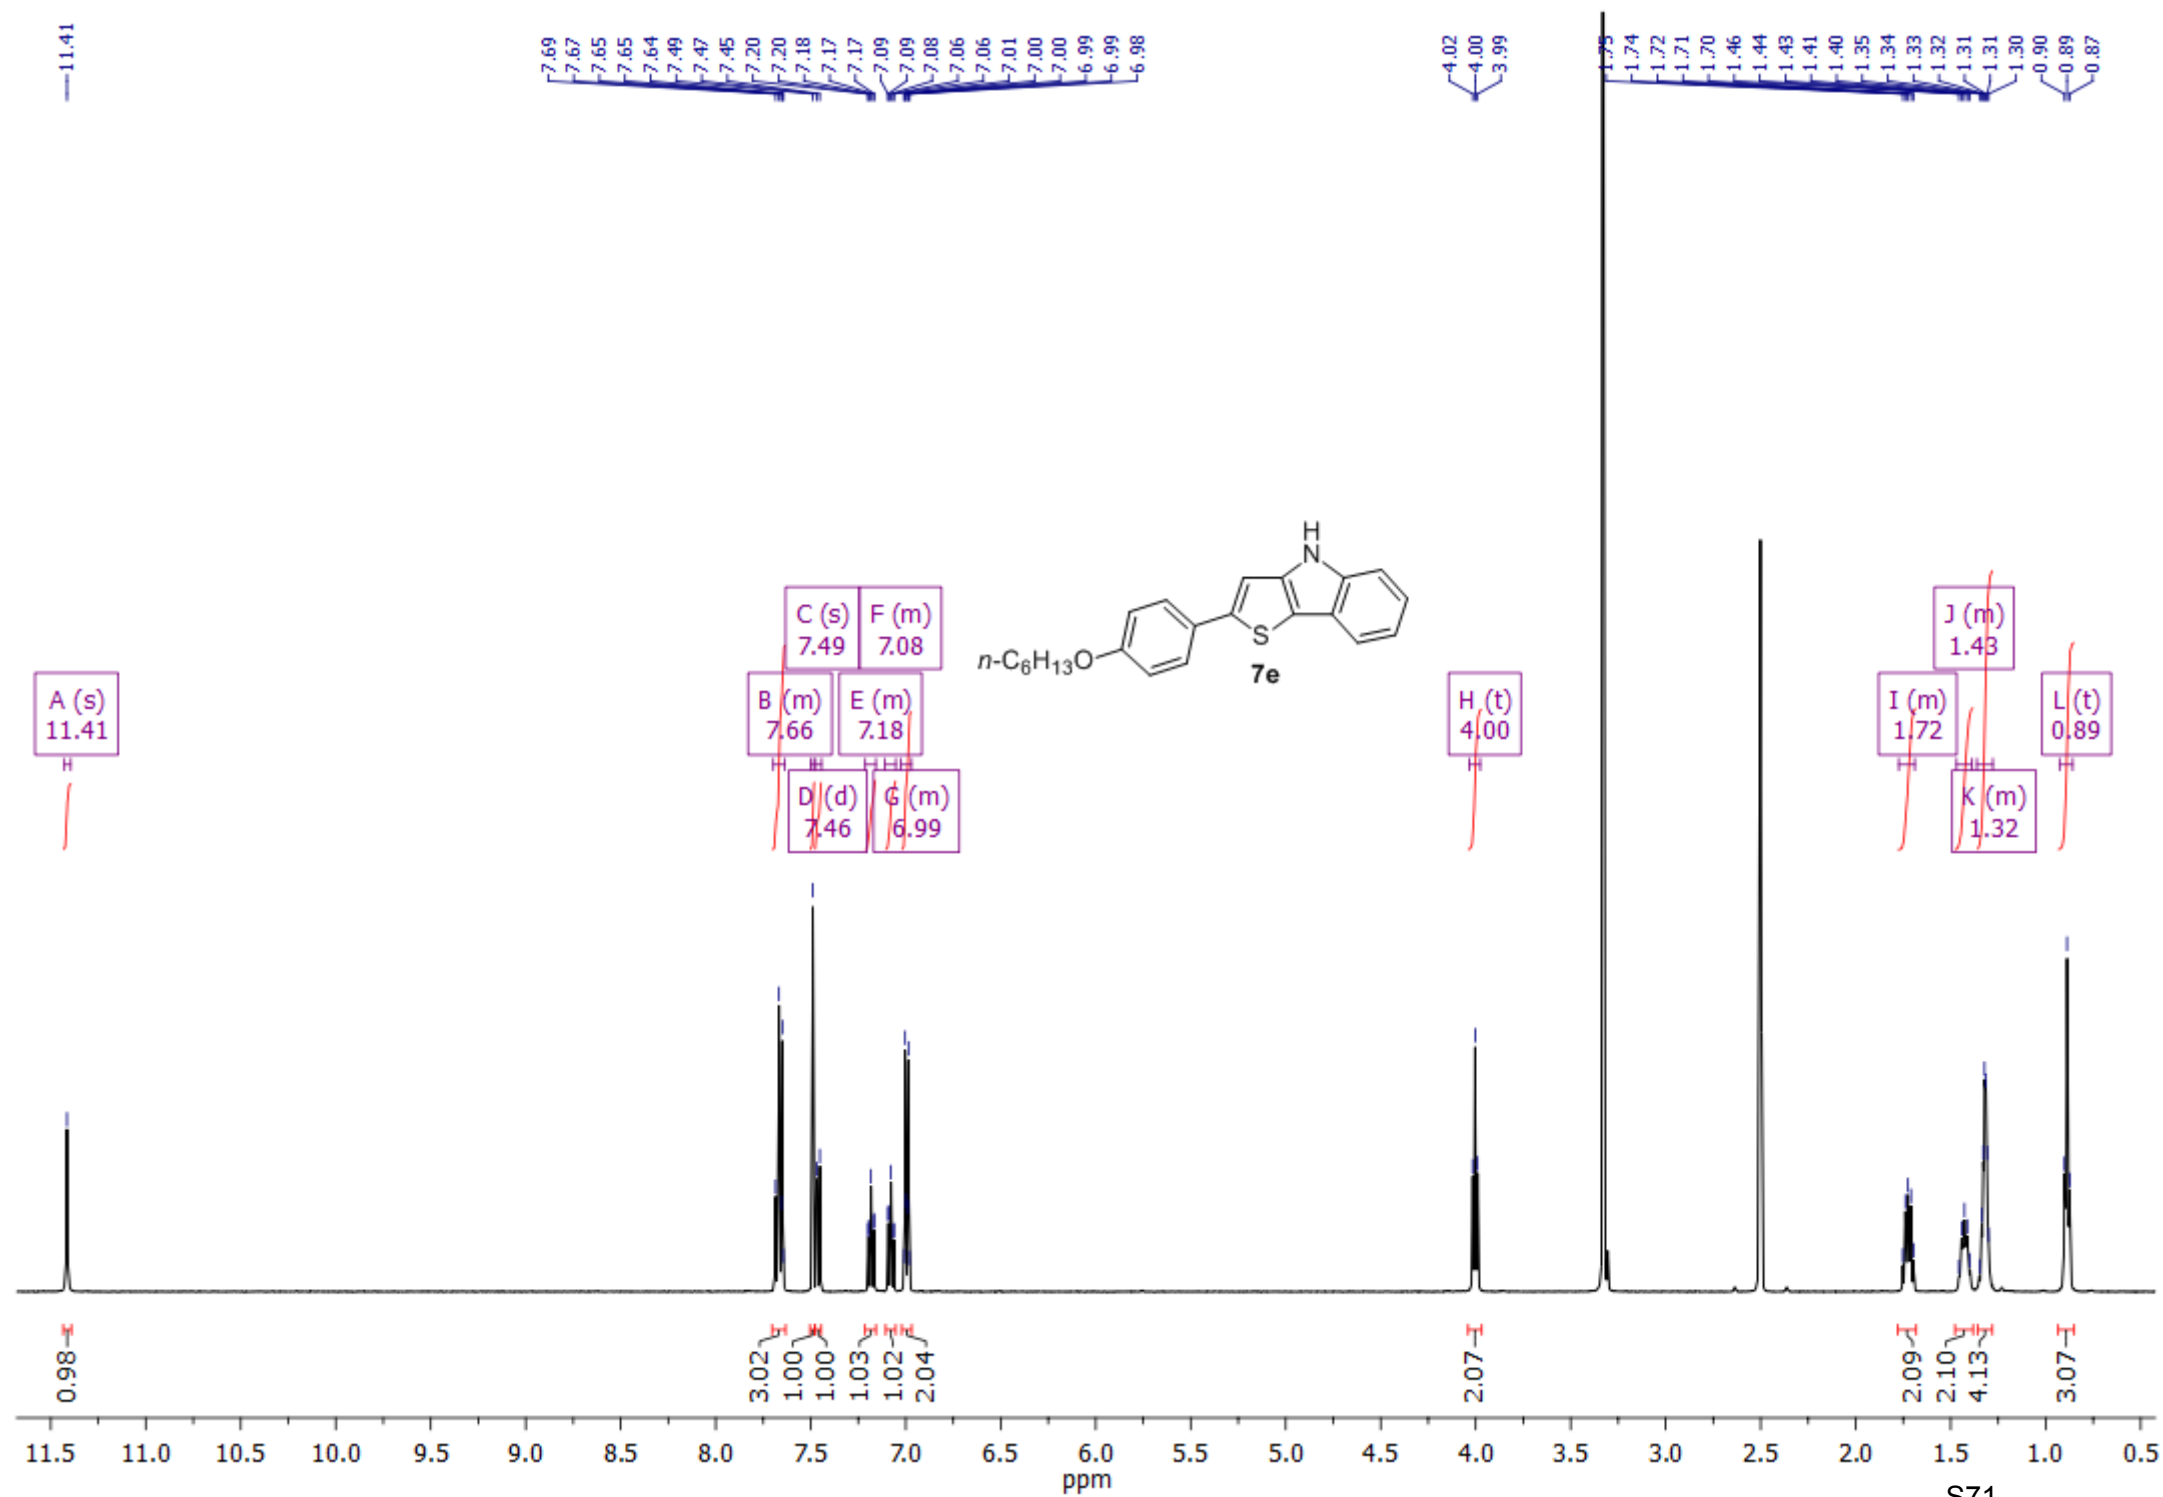

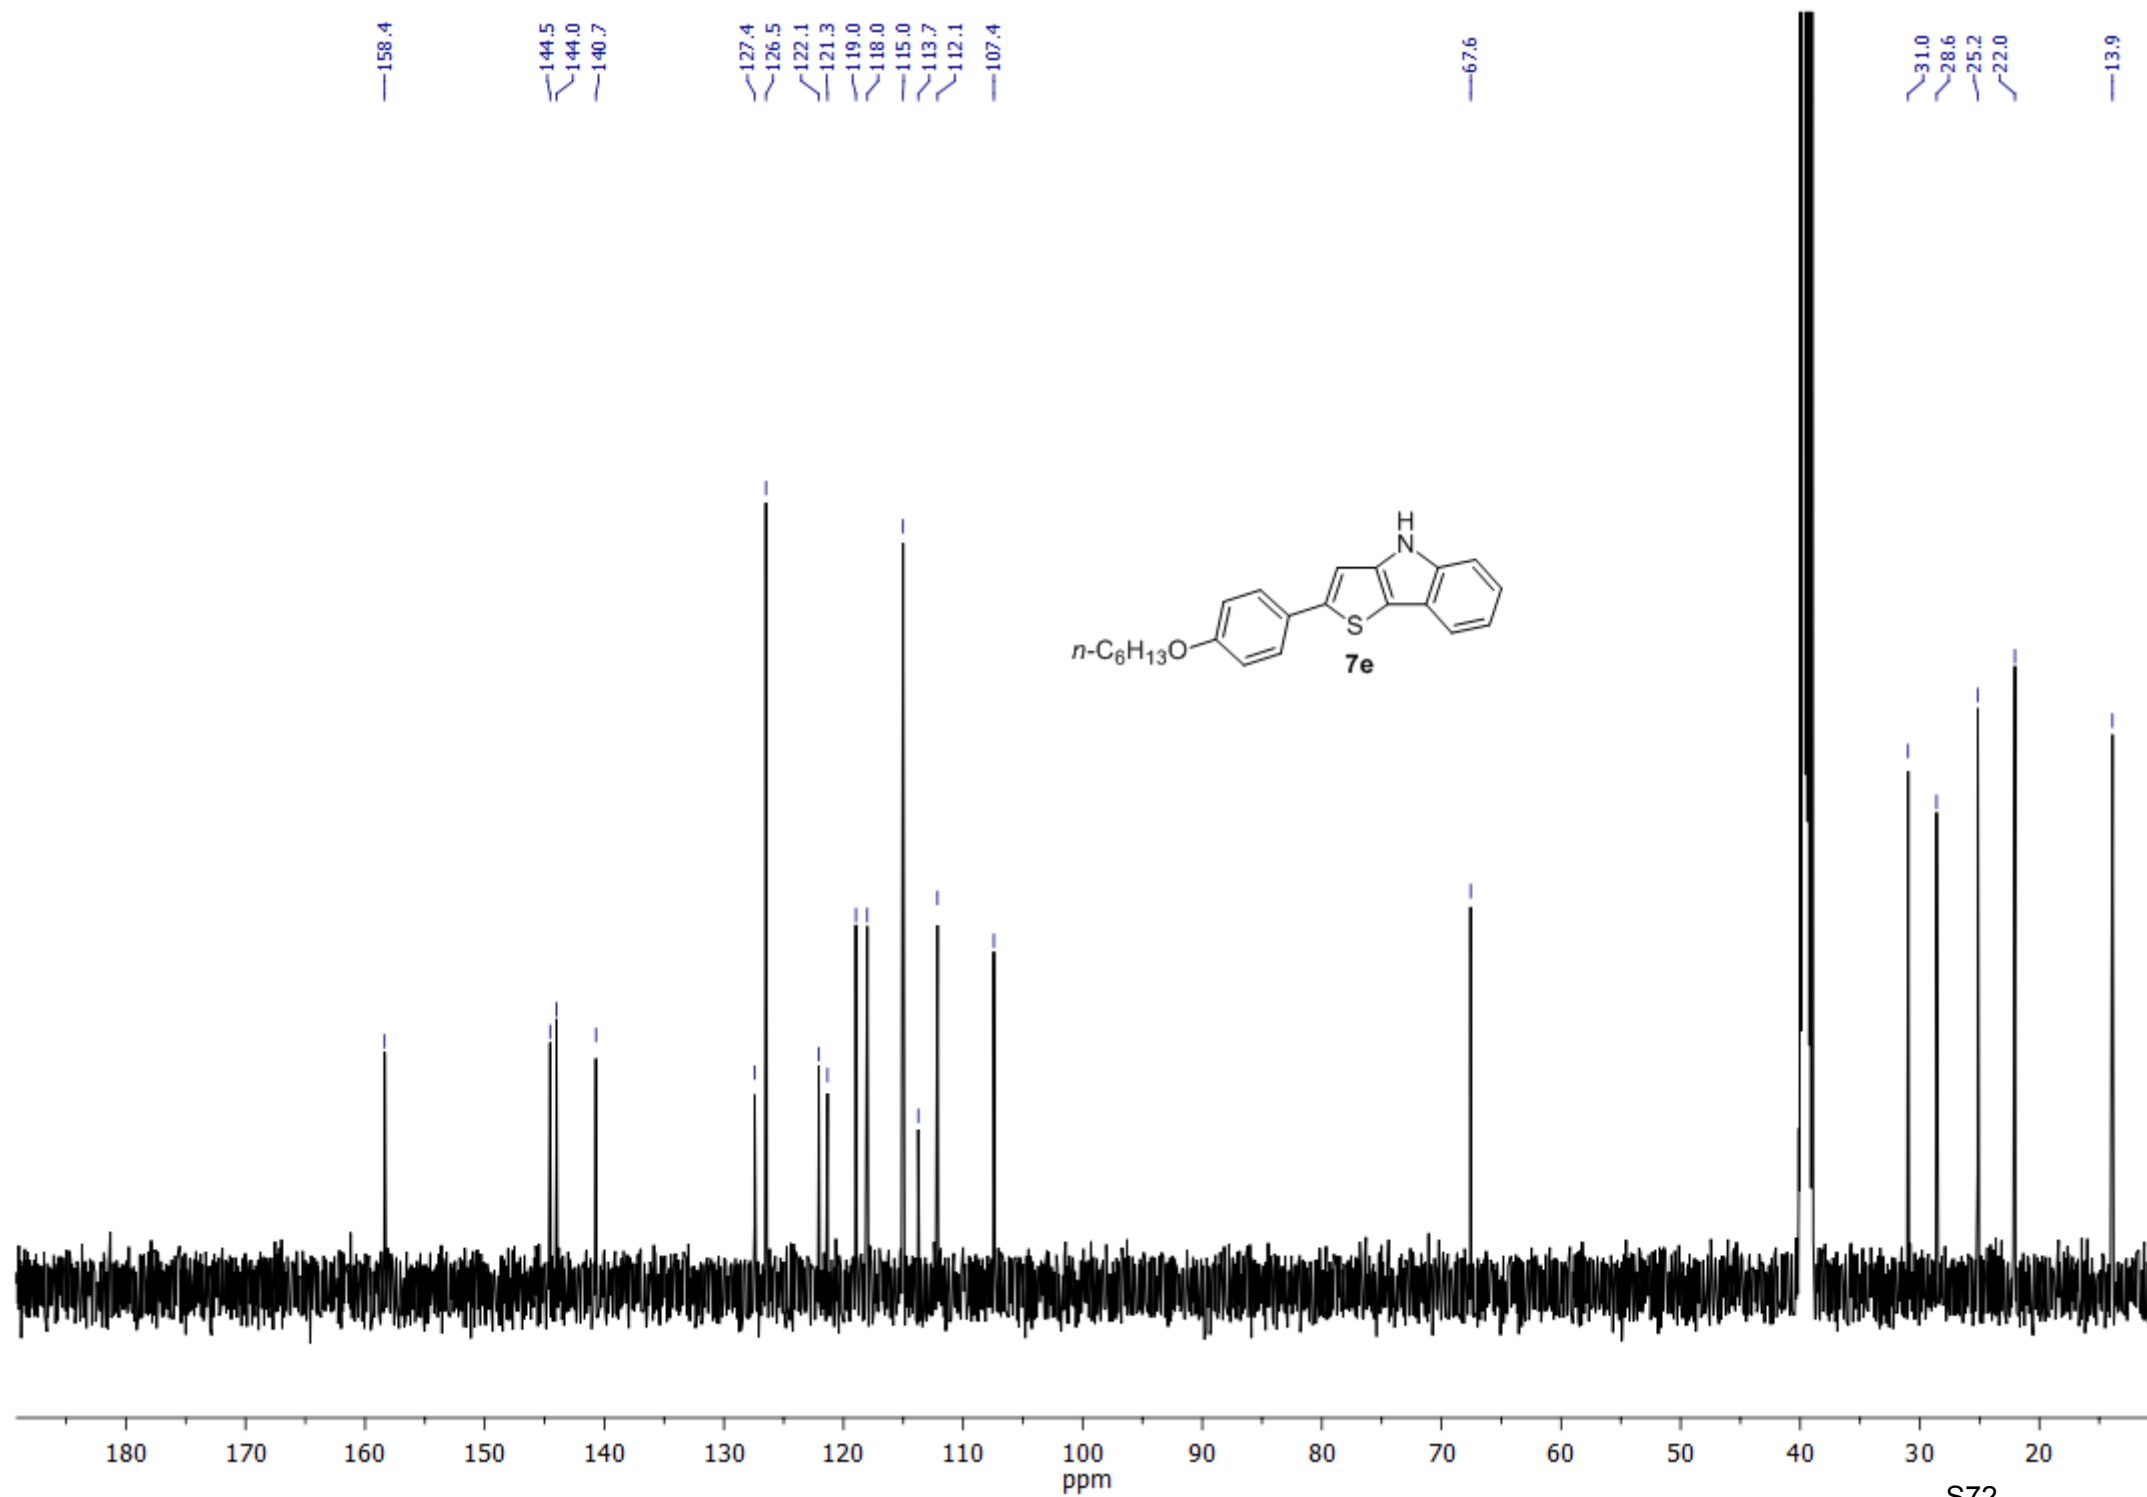



<sup>1</sup>H NMR (solvent: DMSO-*d*<sub>6</sub>)

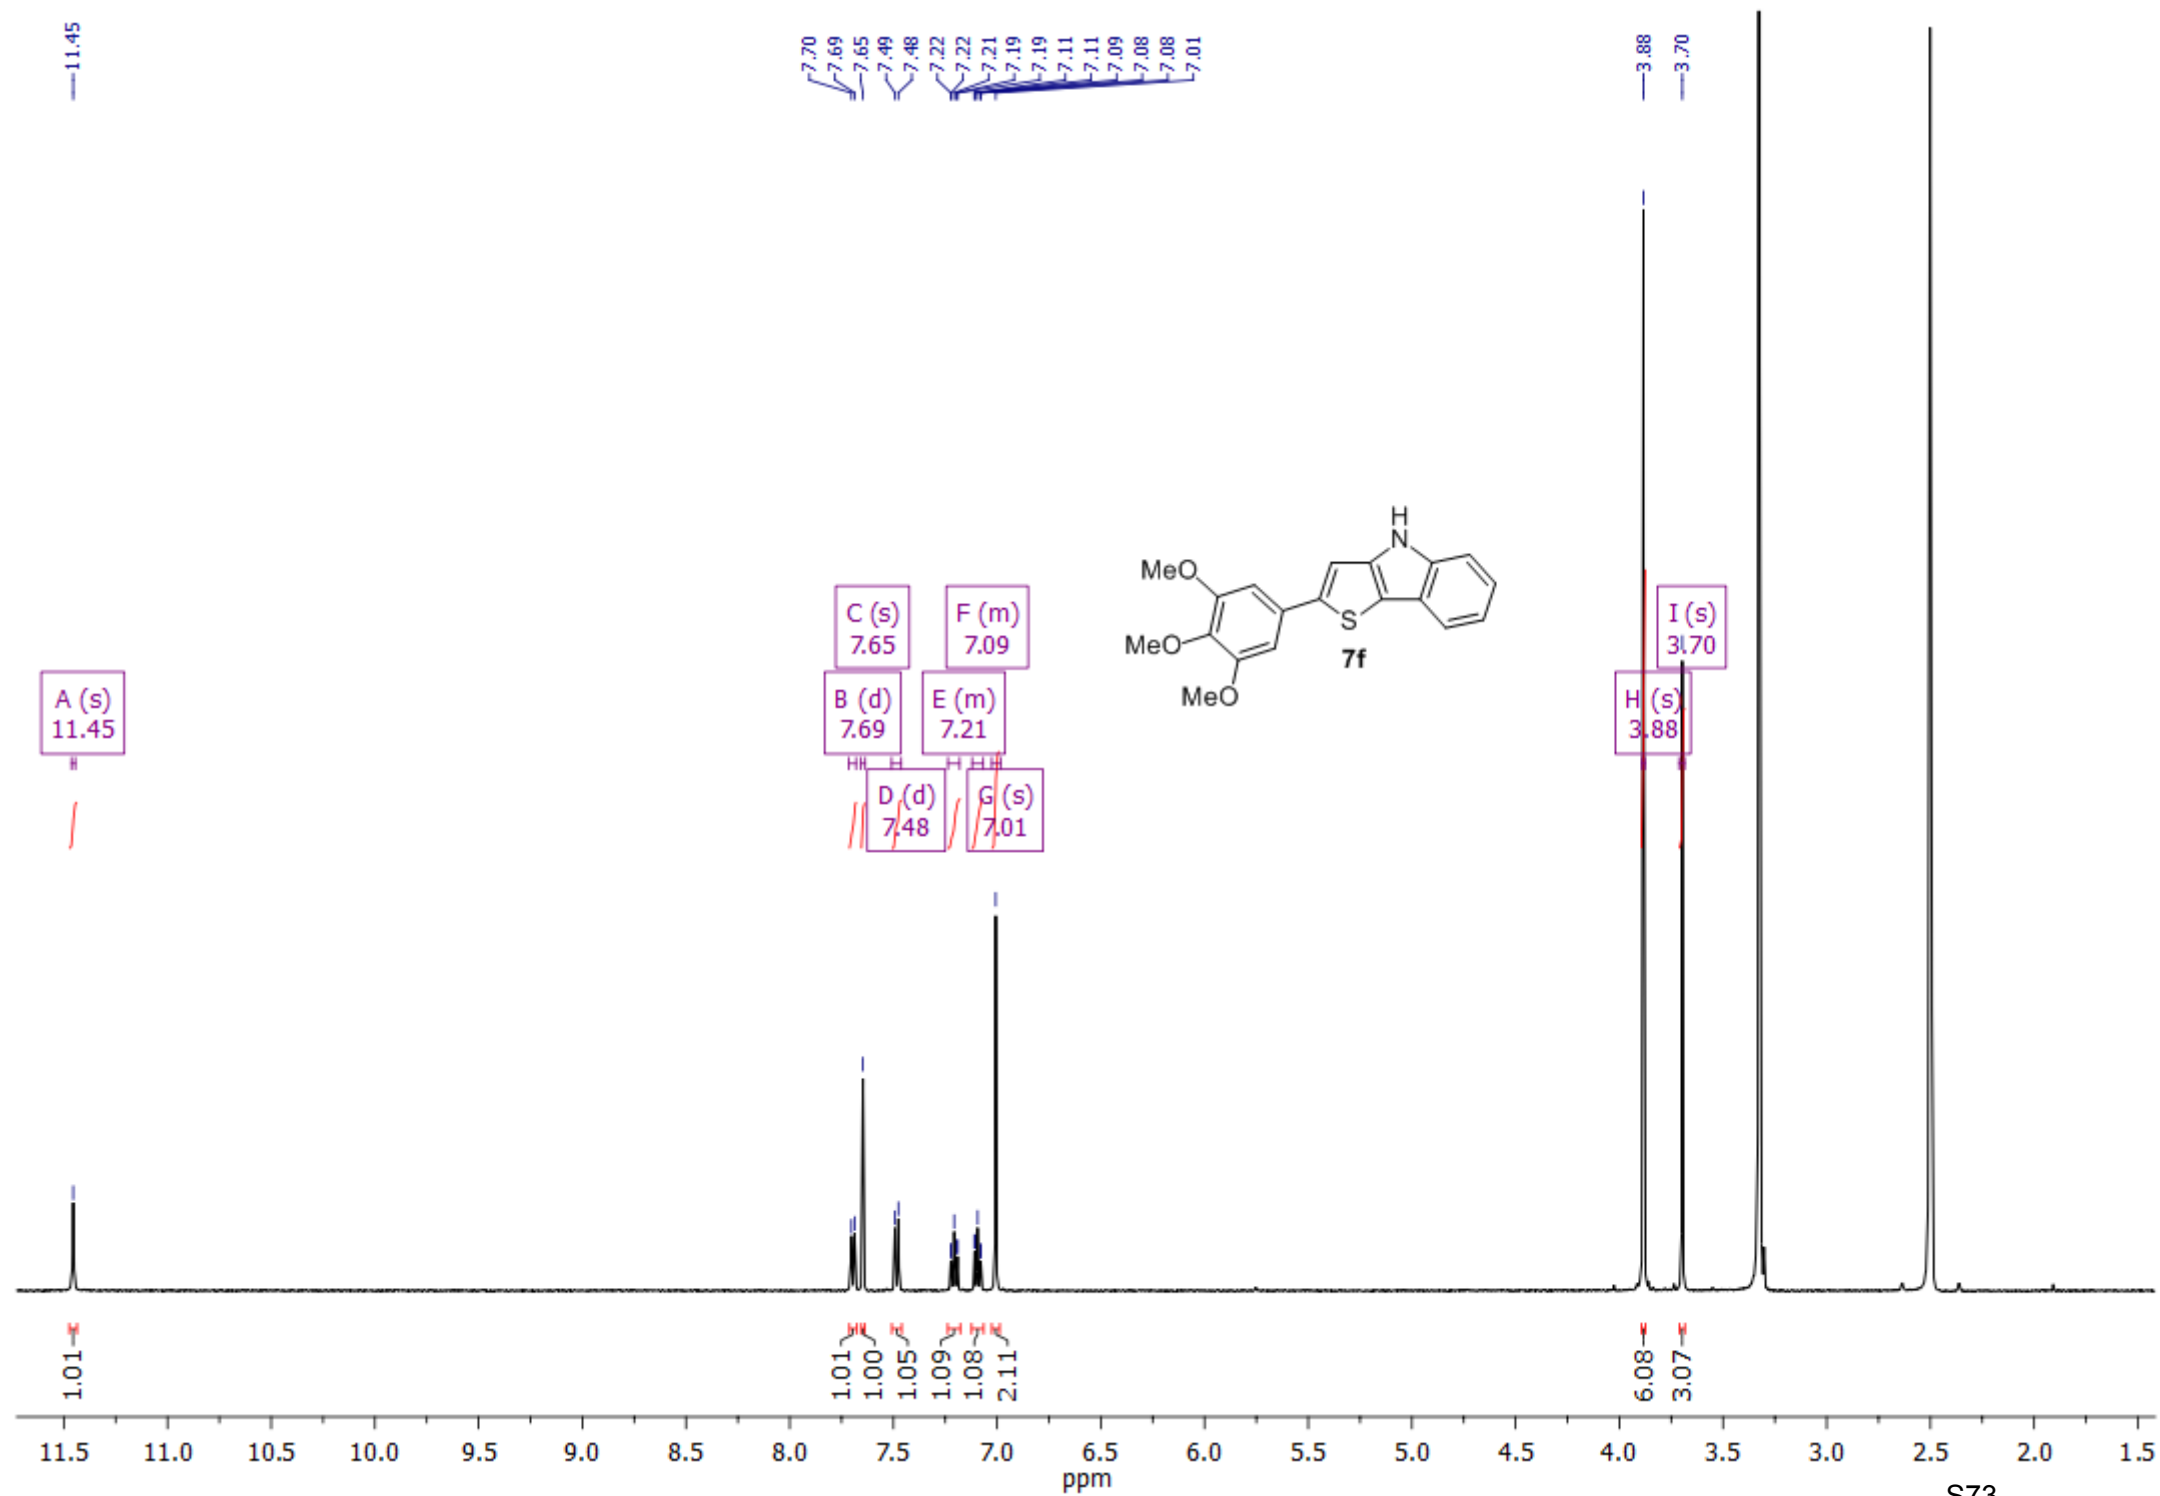

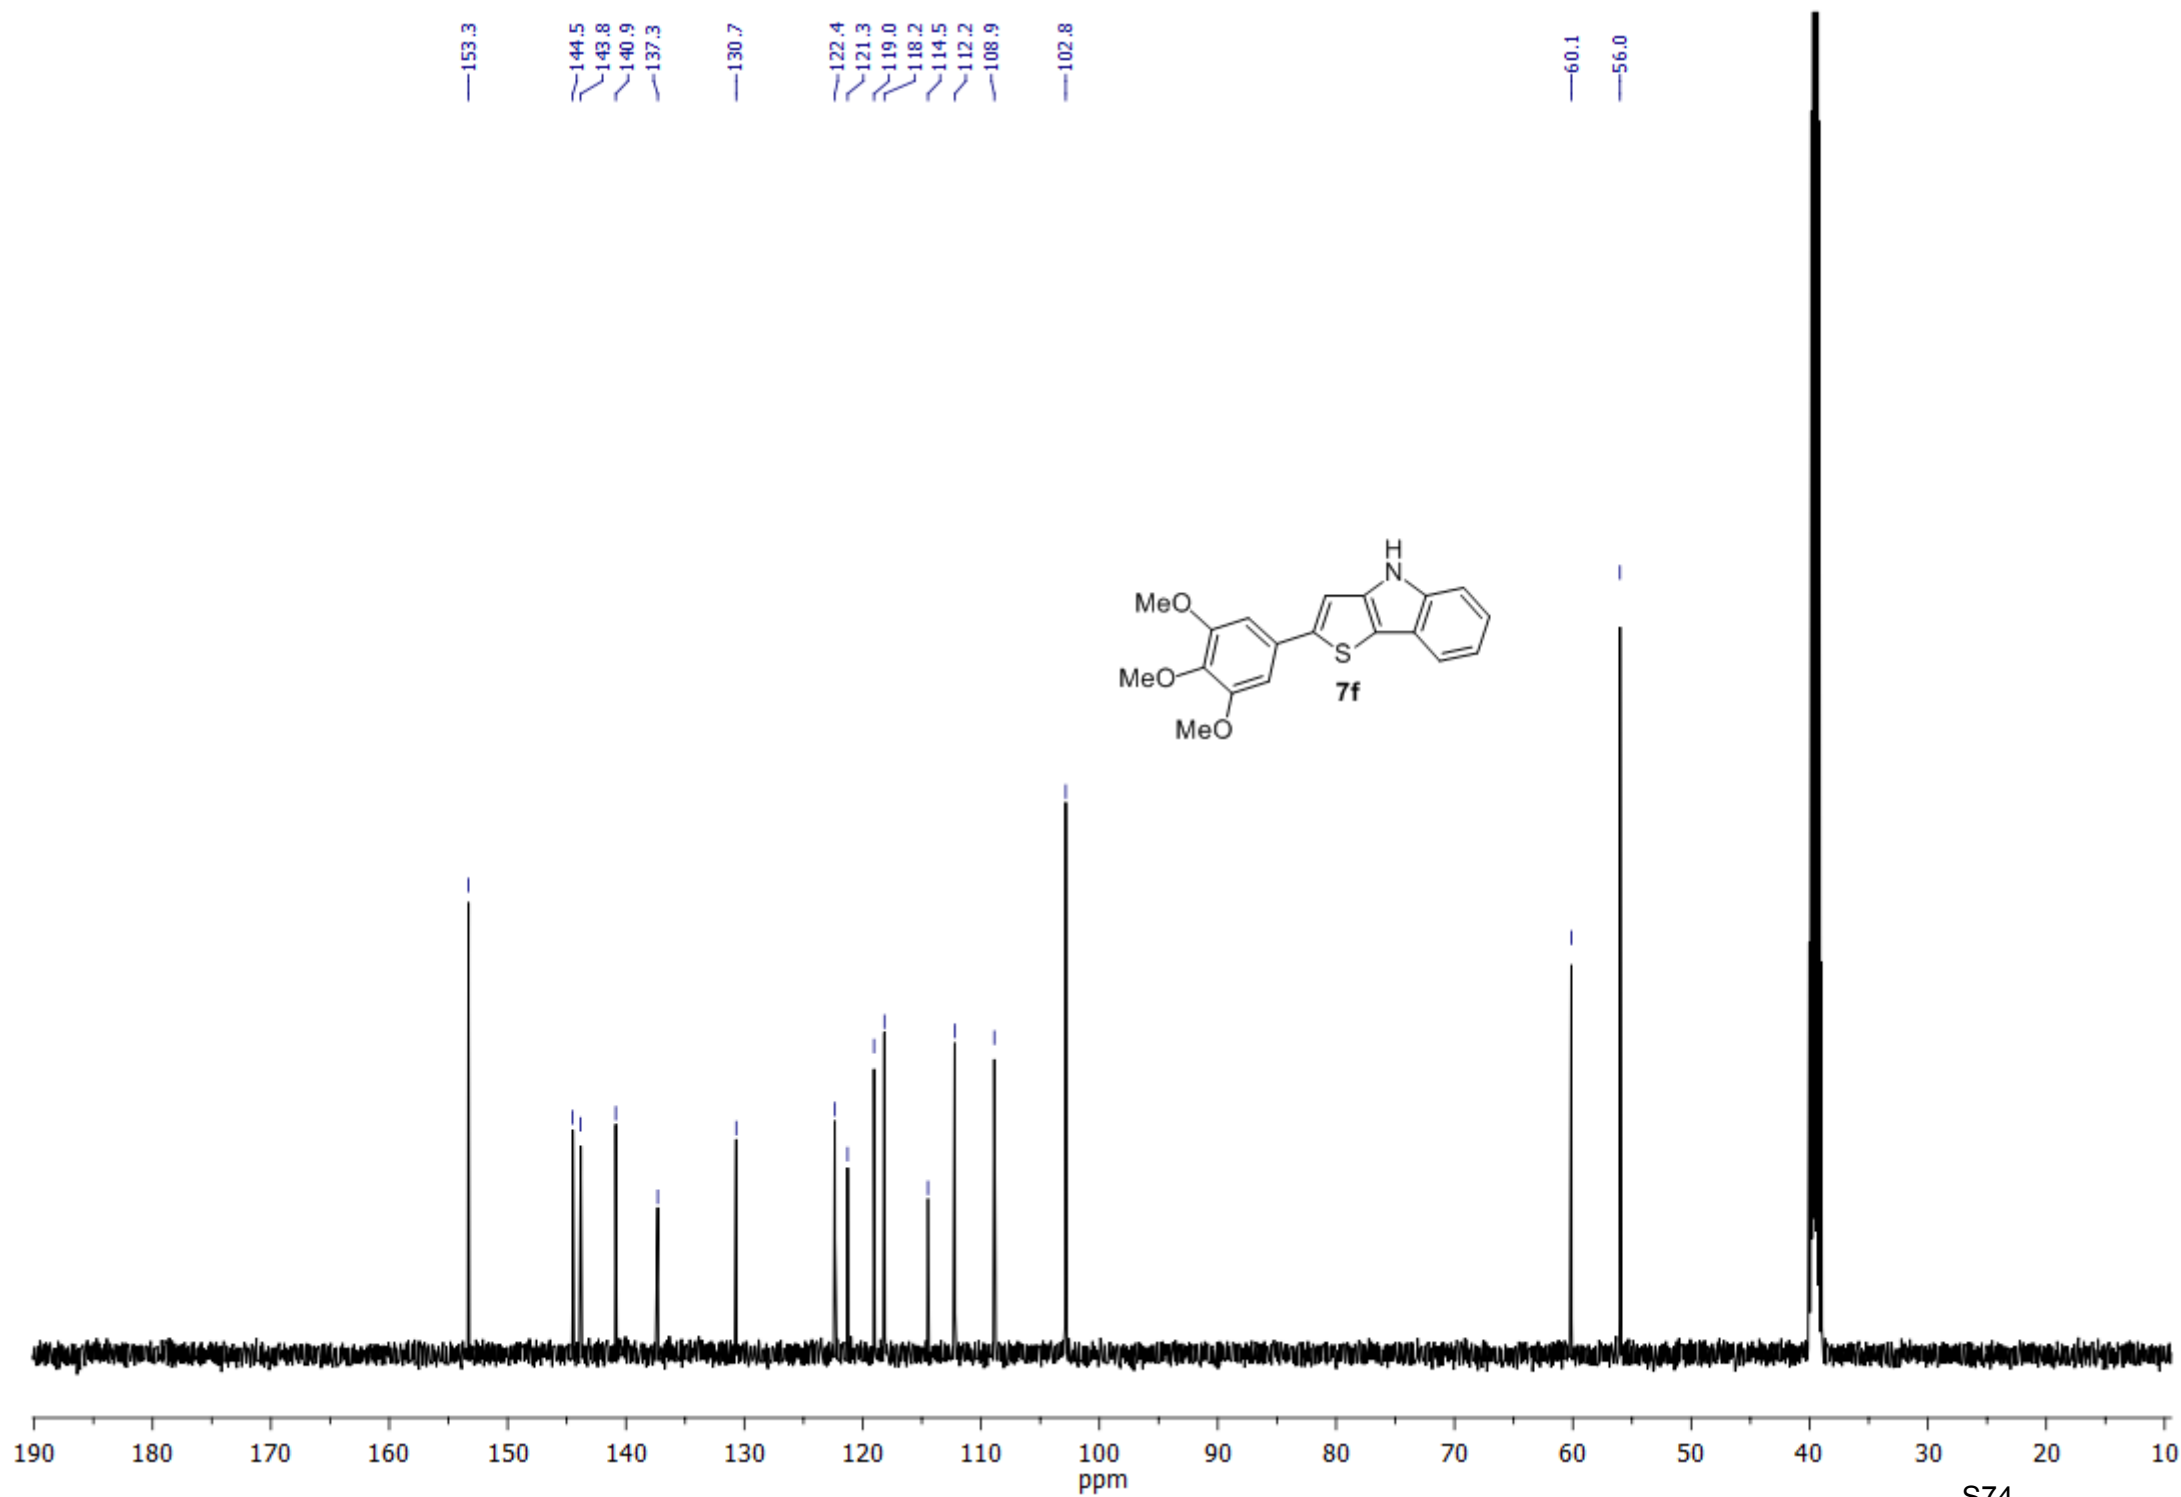

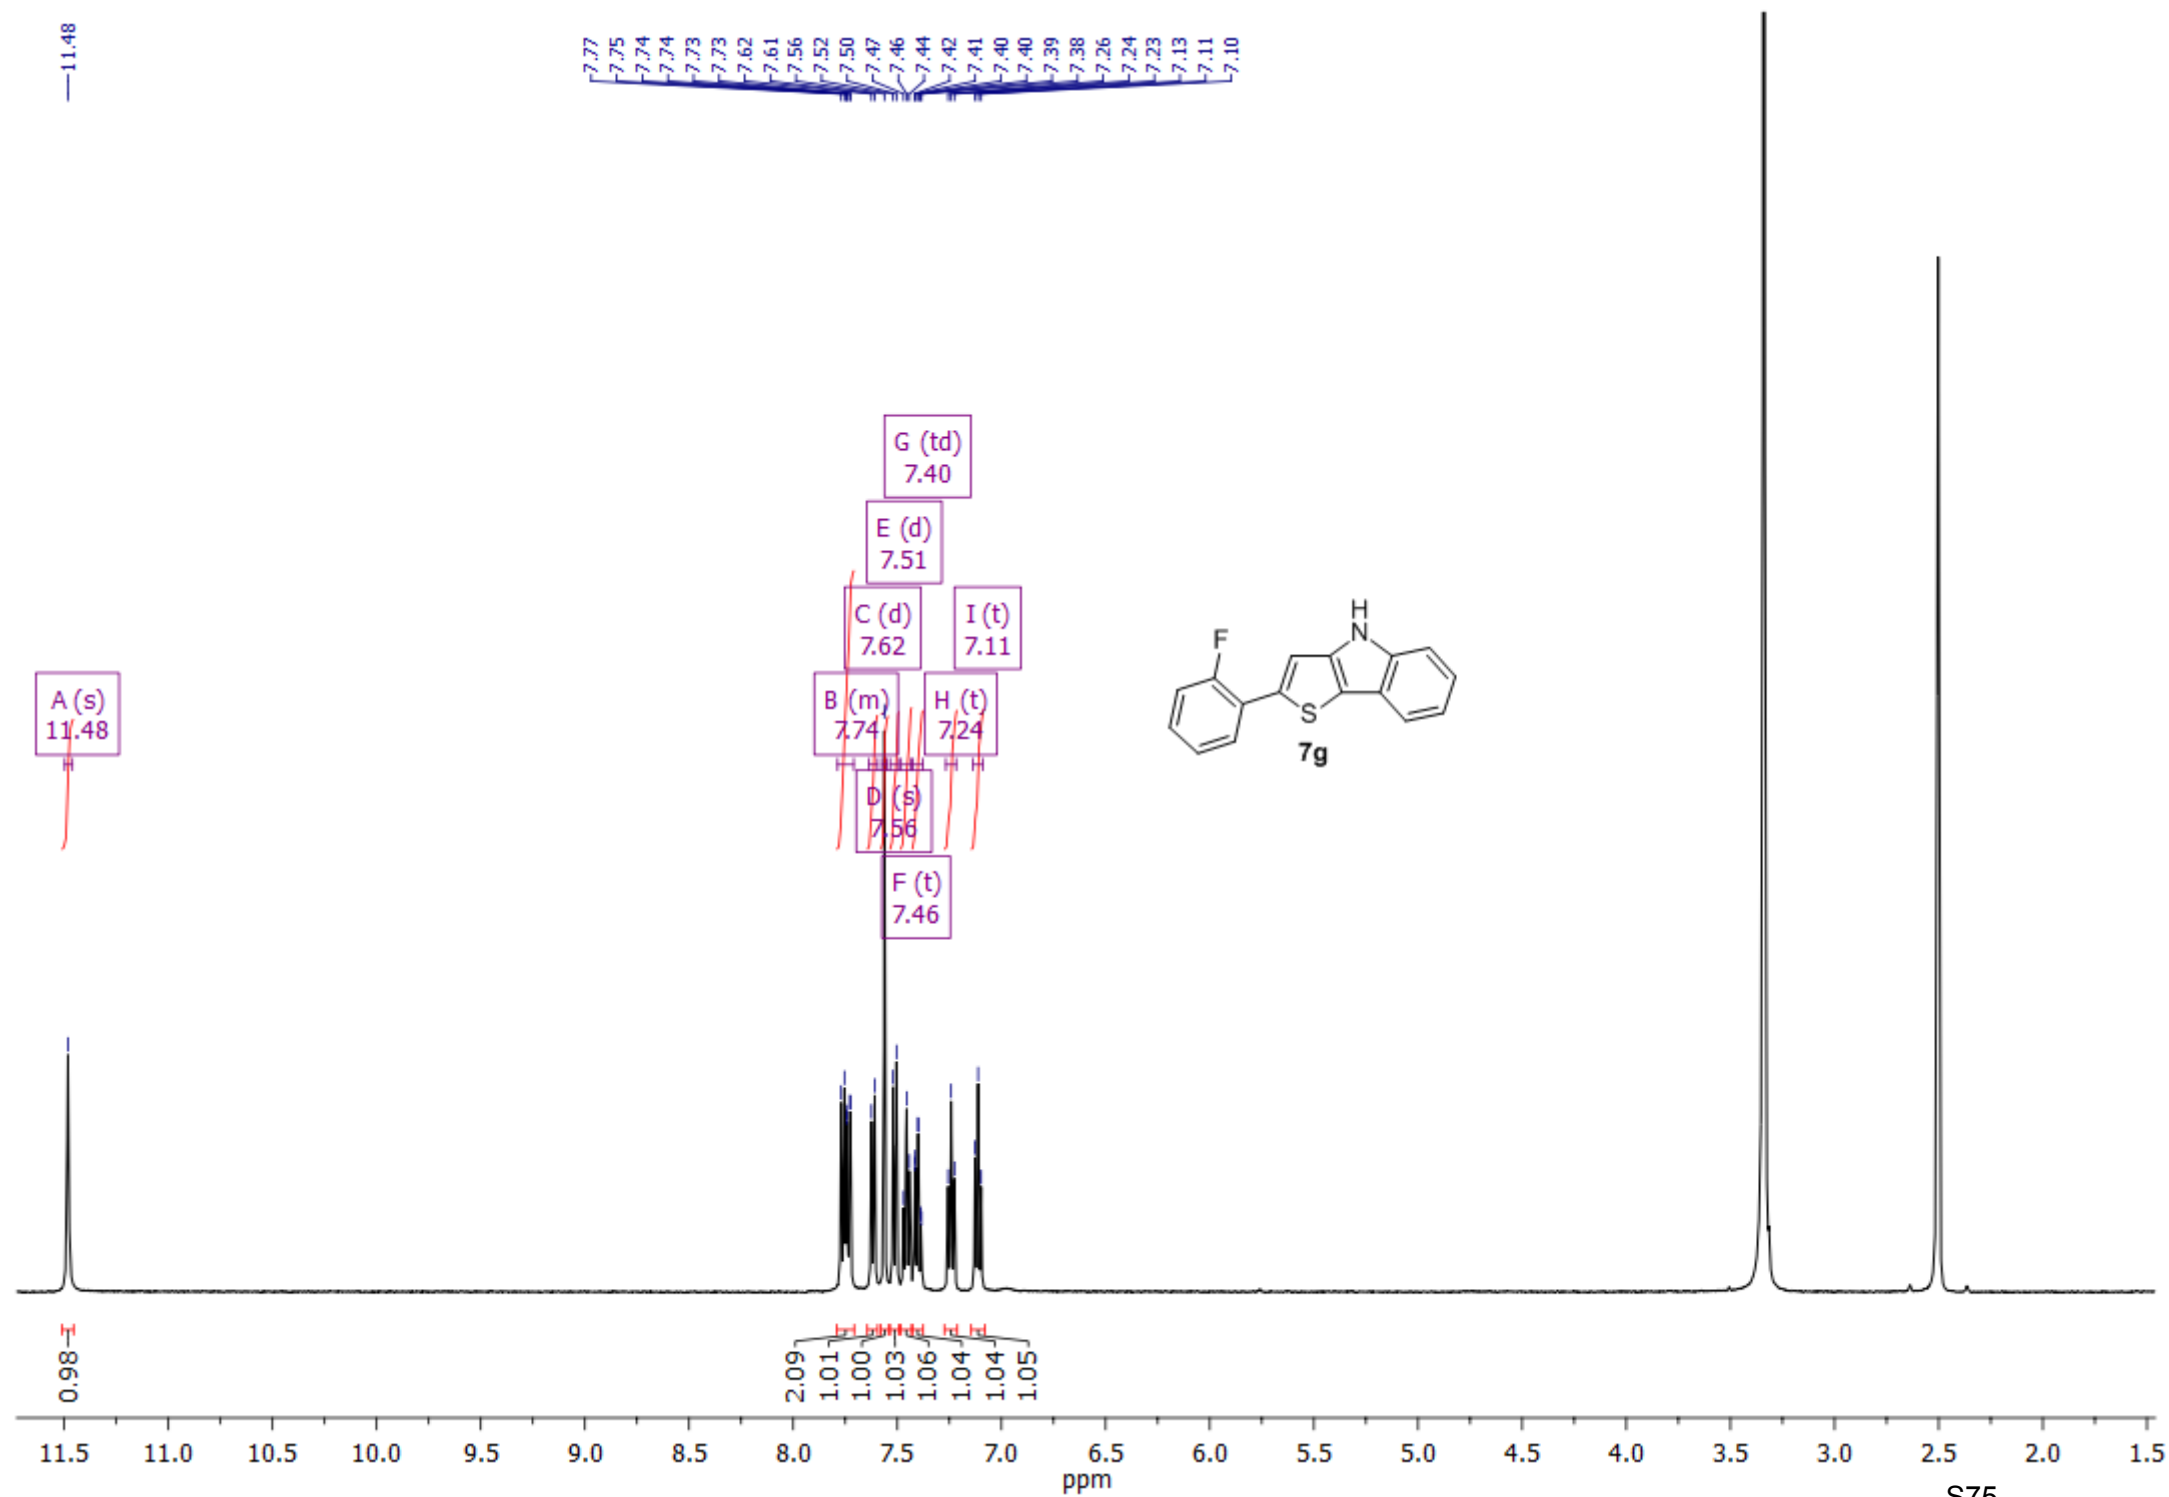

48.40  
48.38  
48.36  
48.34

48.40  
48.38  
48.36  
48.34

A (m)  
48.37

A (m)  
48.37

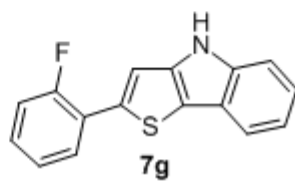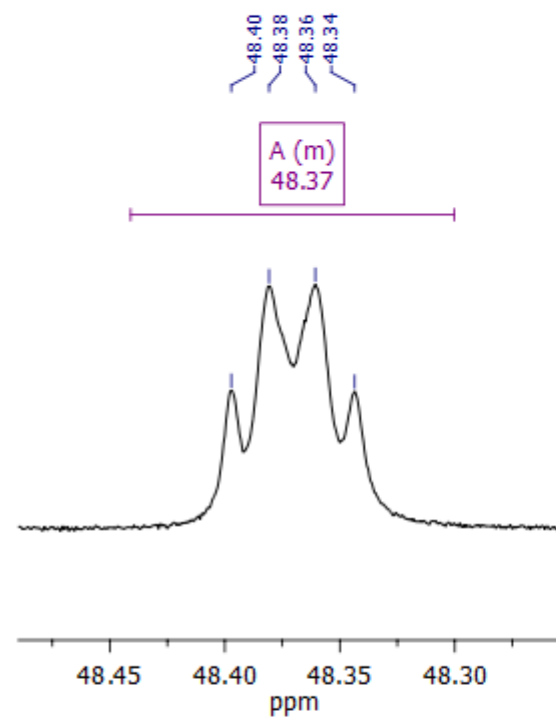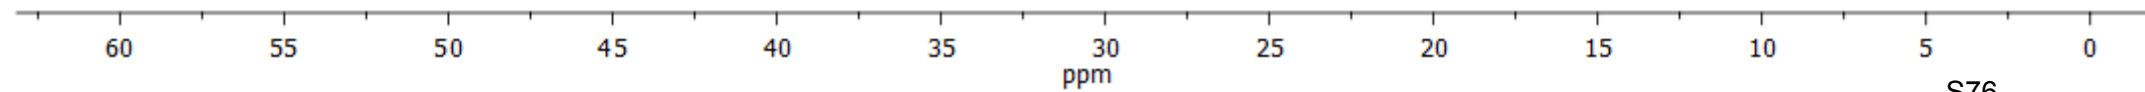

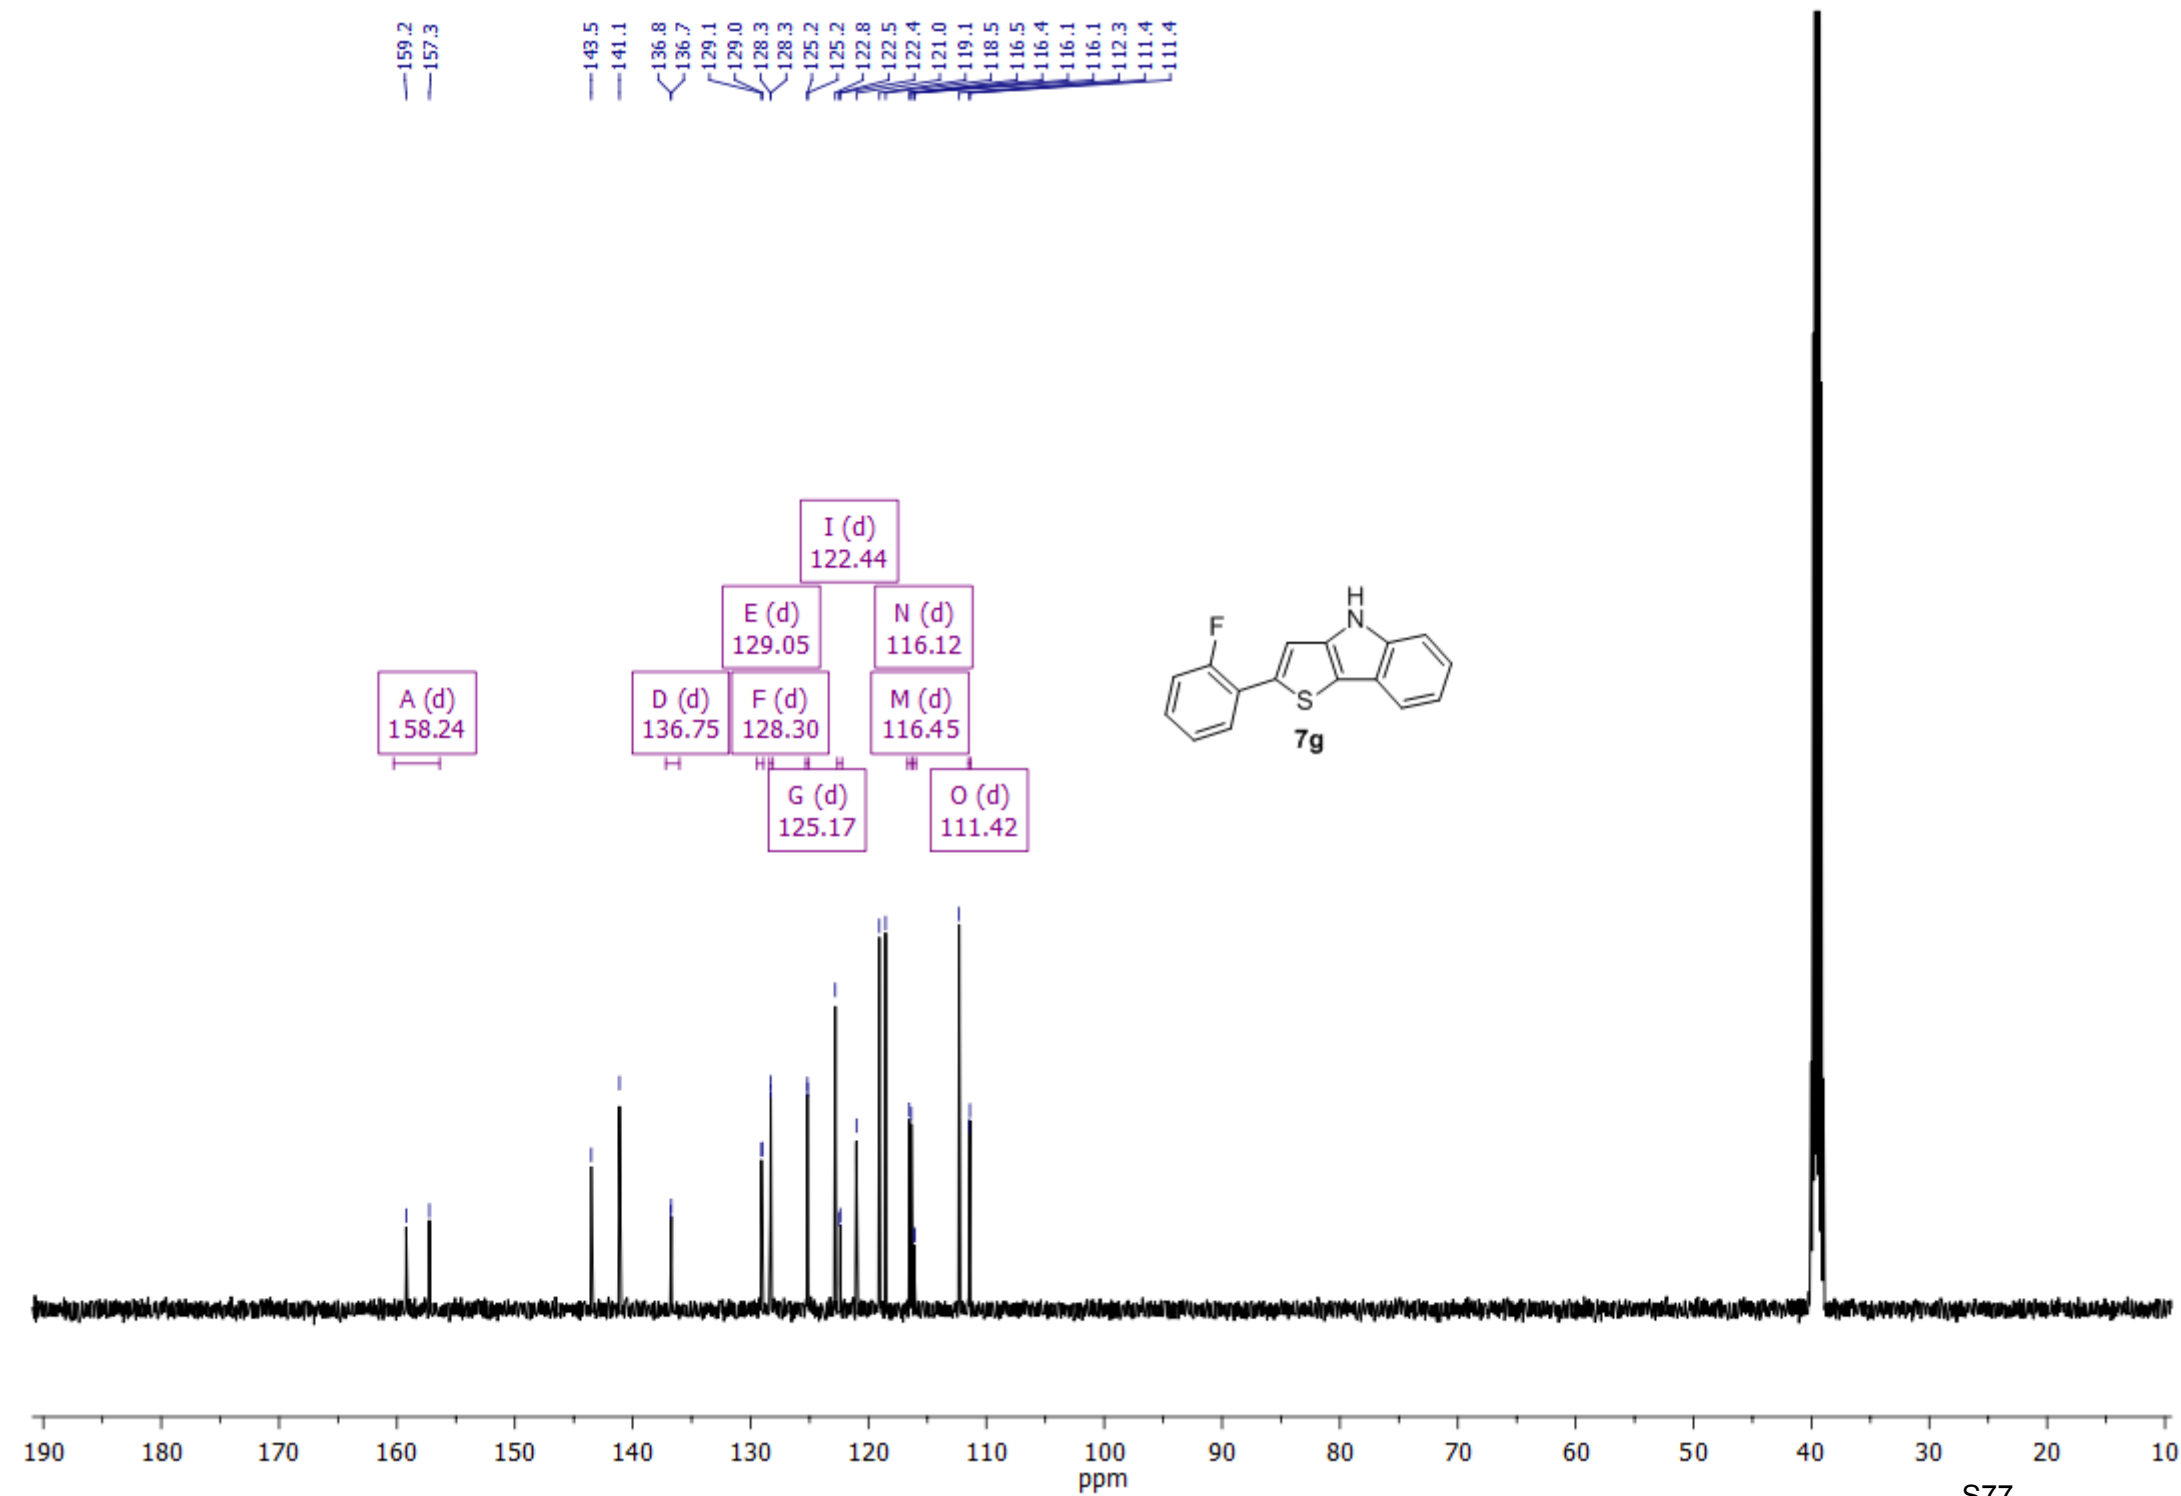

<sup>1</sup>H NMR (solvent: DMSO-*d*<sub>6</sub>)

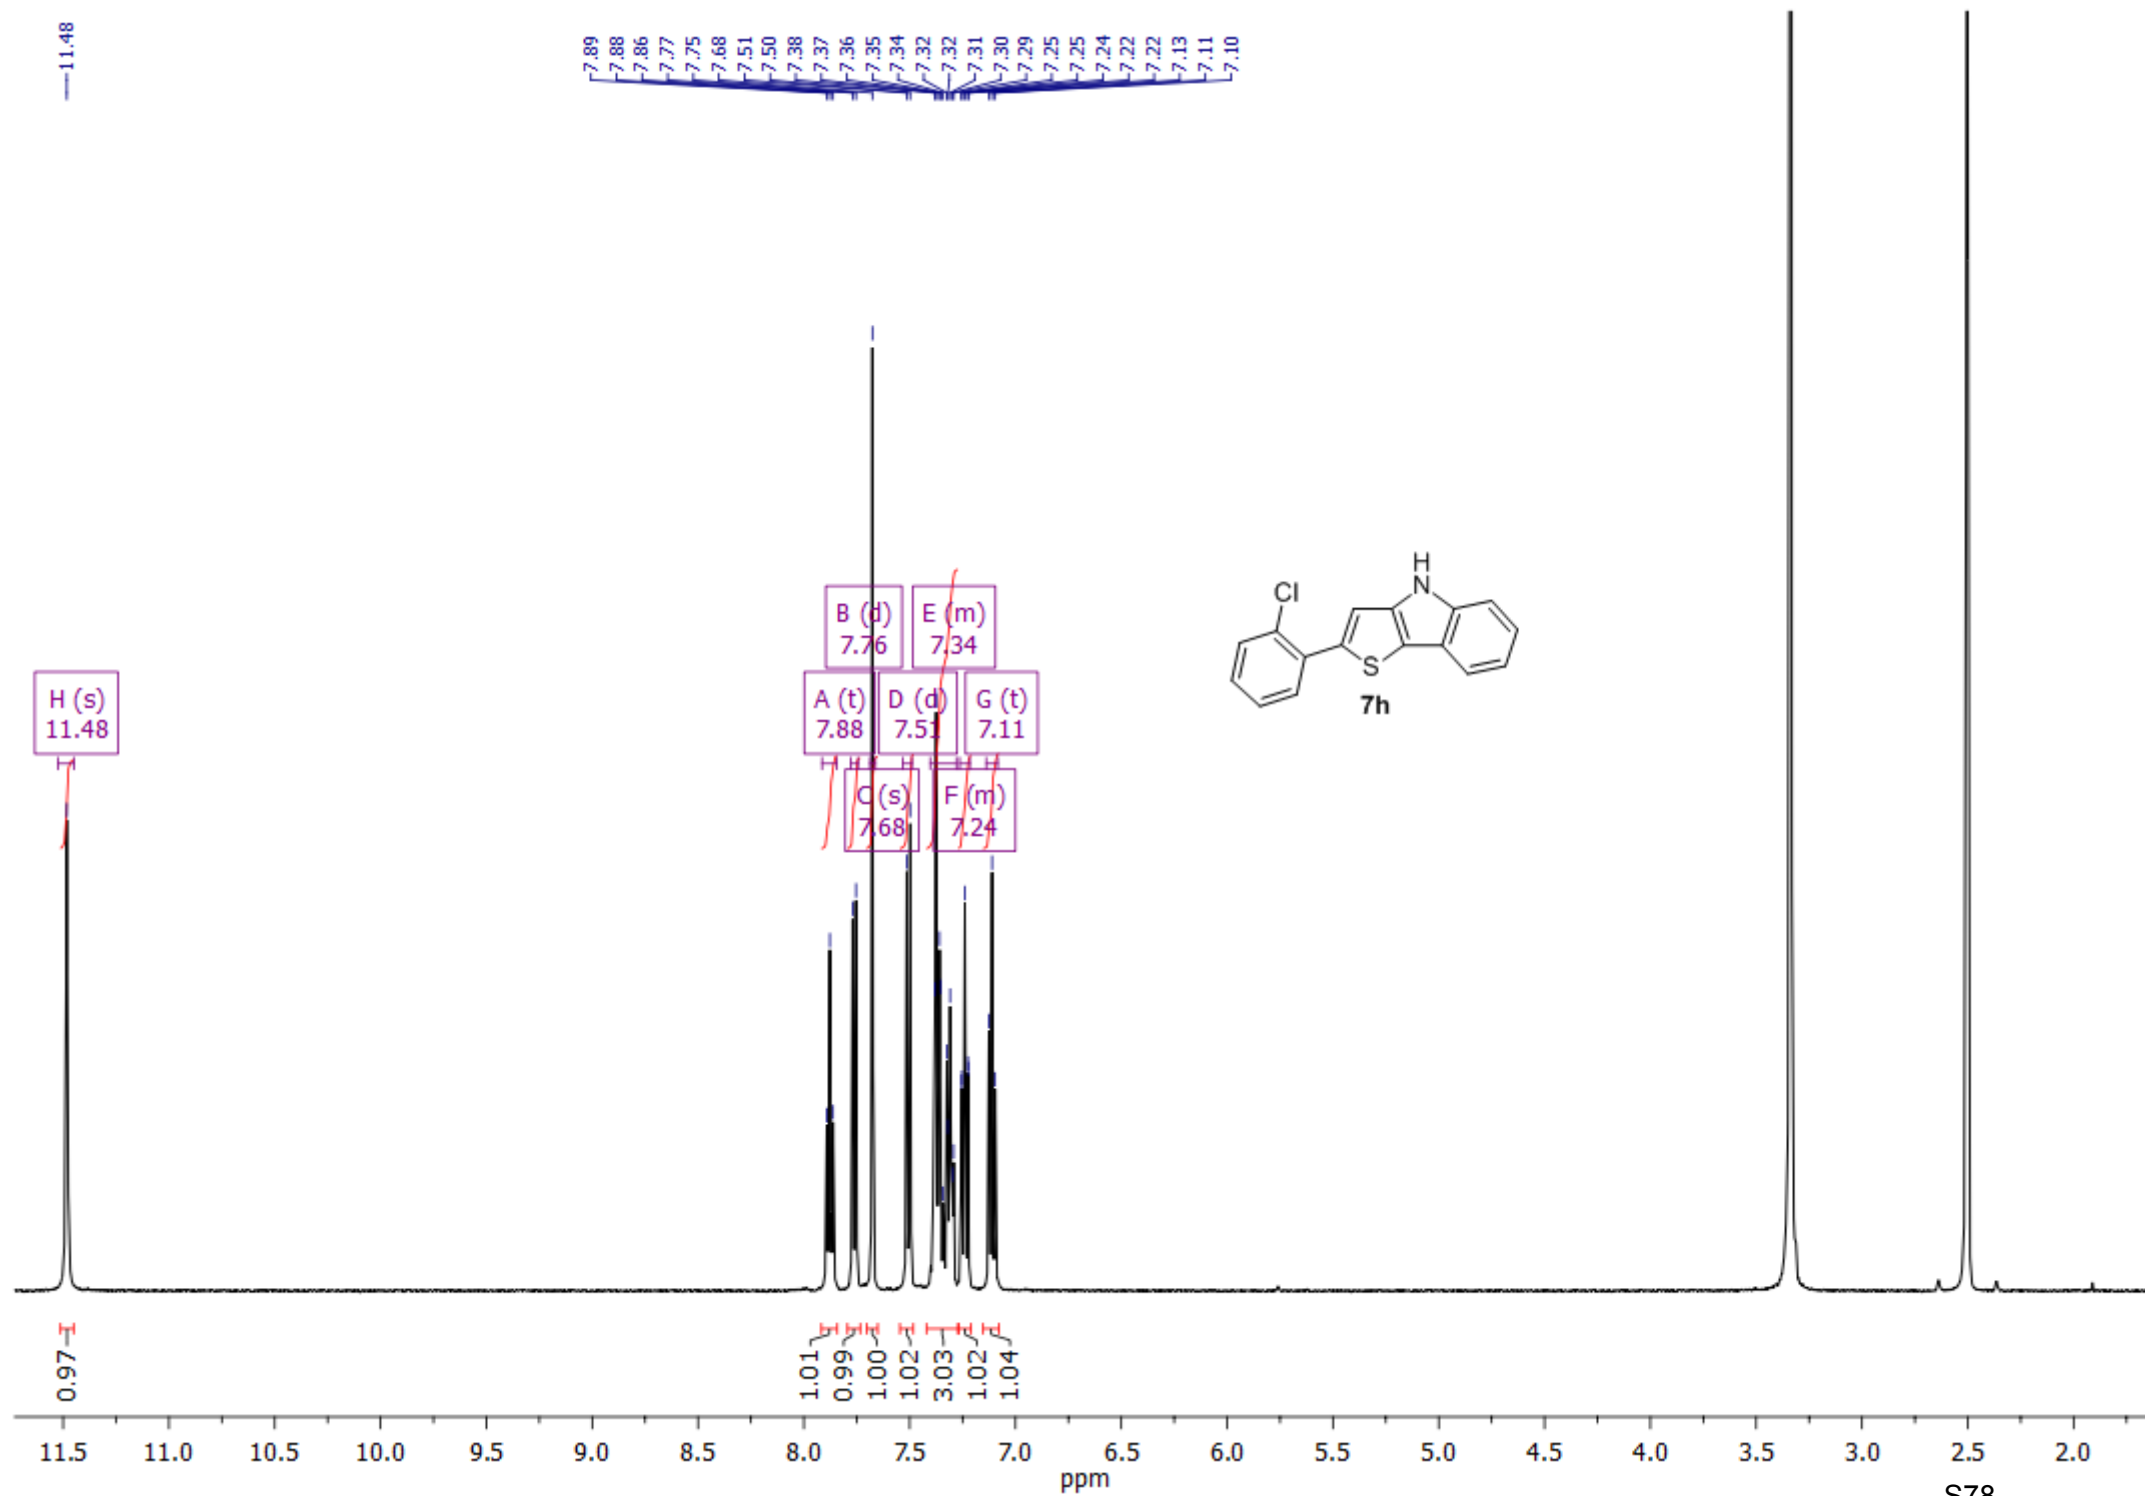

143.1  
140.9  
139.8  
133.2  
131.4  
130.9  
130.6  
129.2  
127.7  
122.8  
121.0  
119.1  
118.5  
116.4  
113.0  
112.3

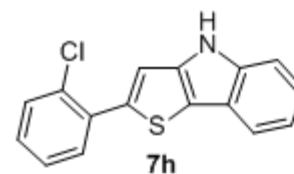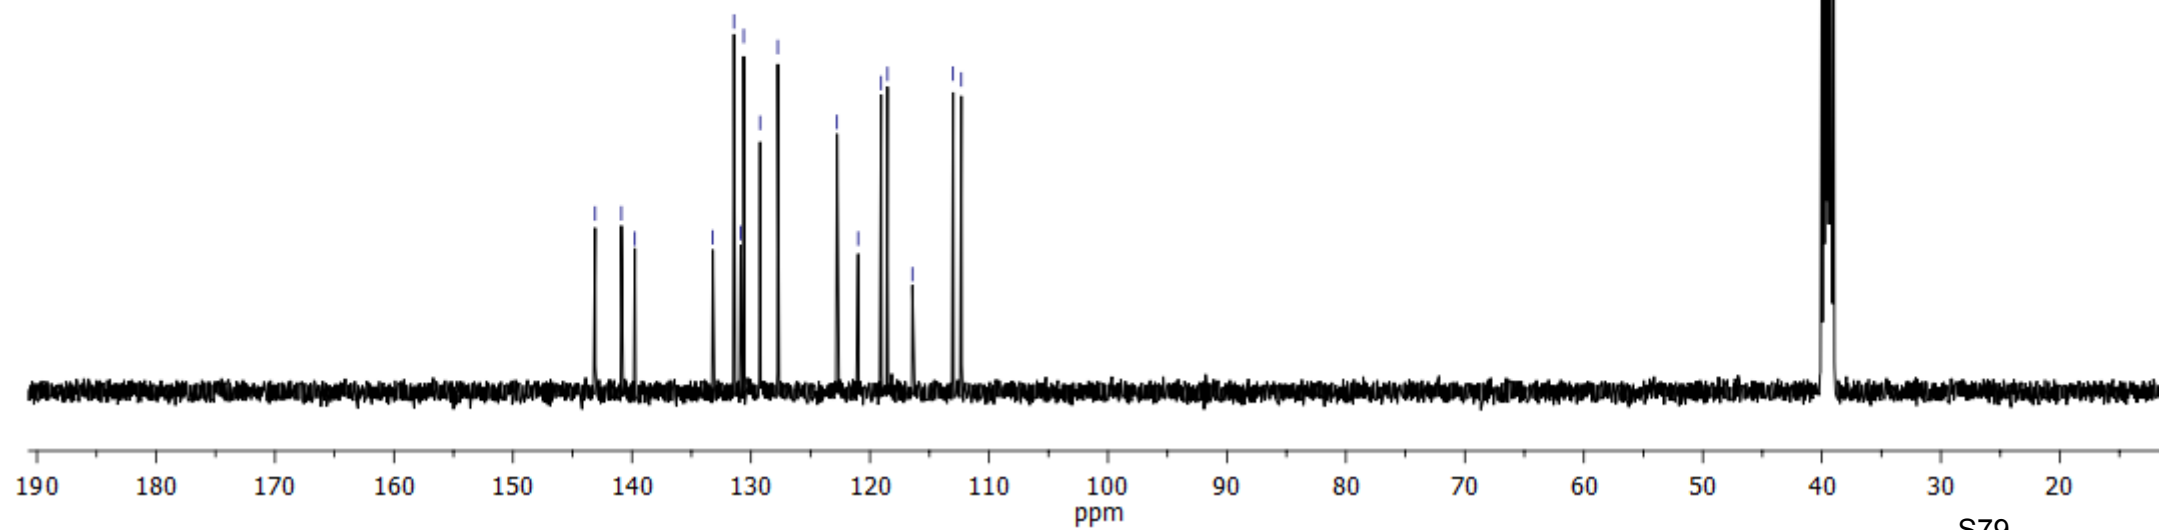

<sup>1</sup>H NMR (solvent: DMSO-*d*<sub>6</sub>)

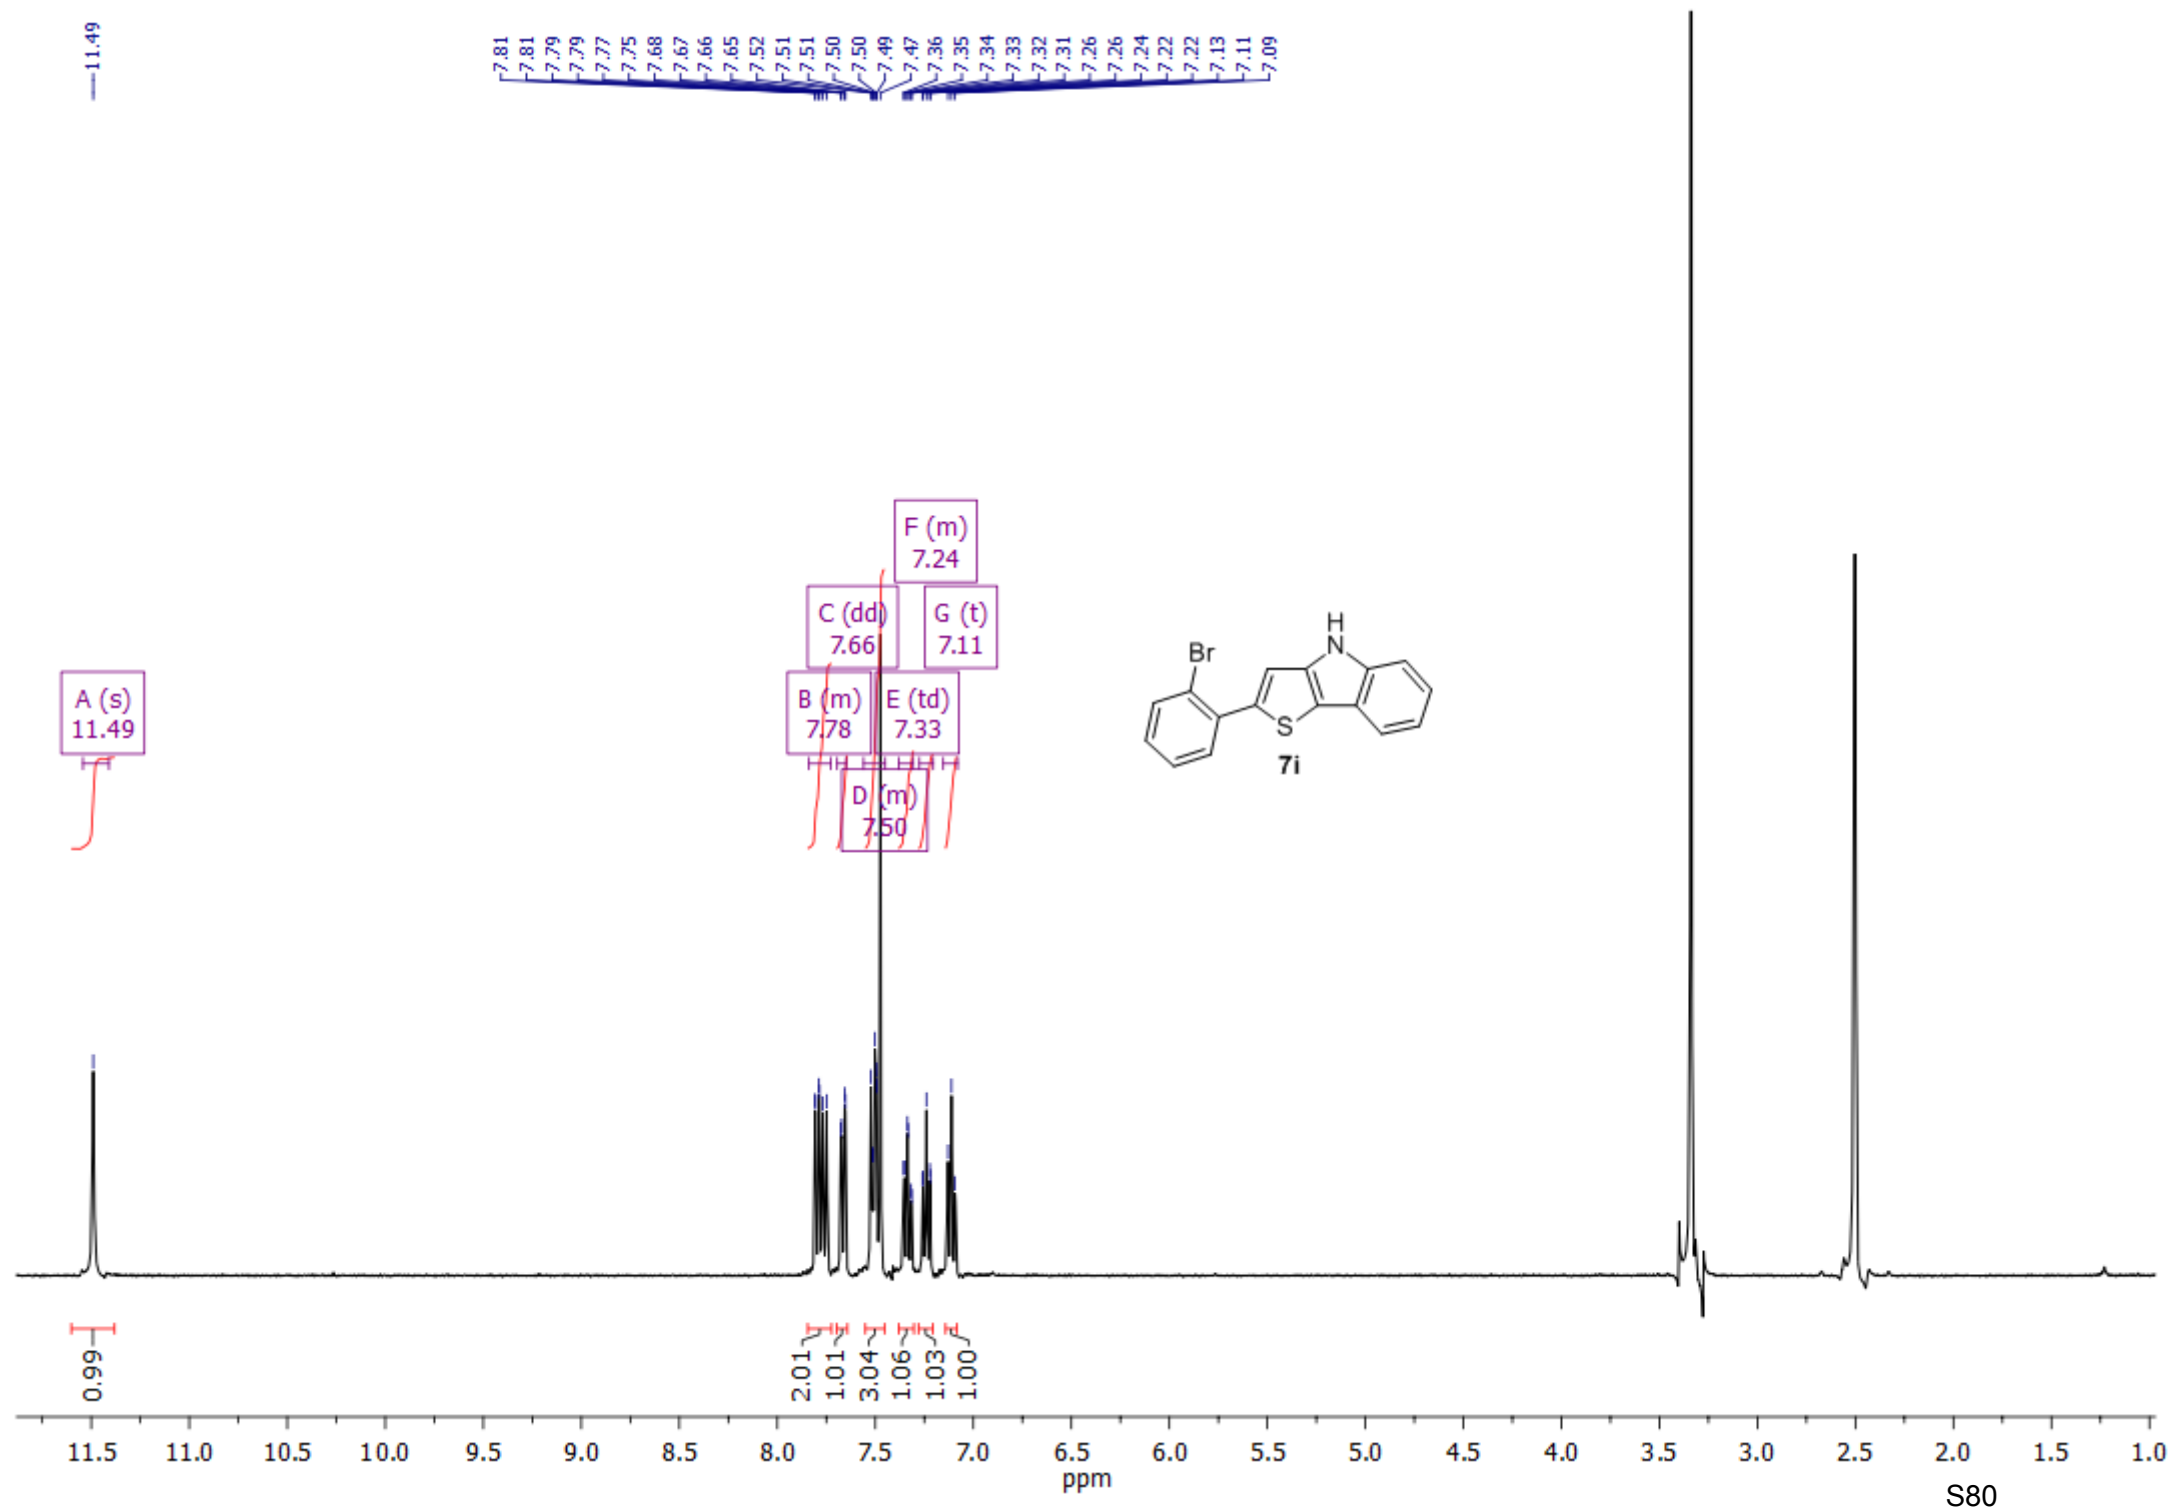



143.0  
141.5  
140.8  
135.3  
133.7  
132.0  
129.7  
128.1  
122.7  
121.8  
121.0  
119.1  
118.5  
116.3  
113.1  
112.3

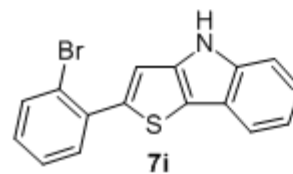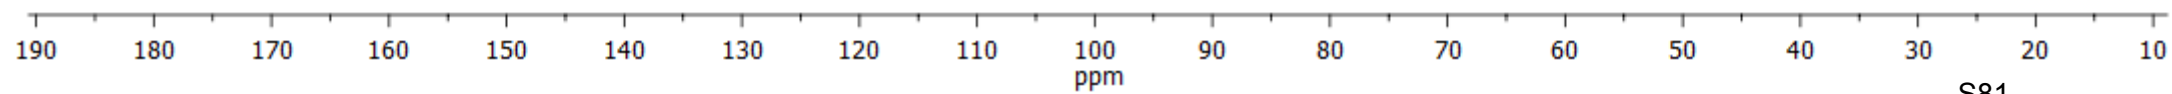

<sup>1</sup>H NMR (solvent: DMSO-*d*<sub>6</sub>)

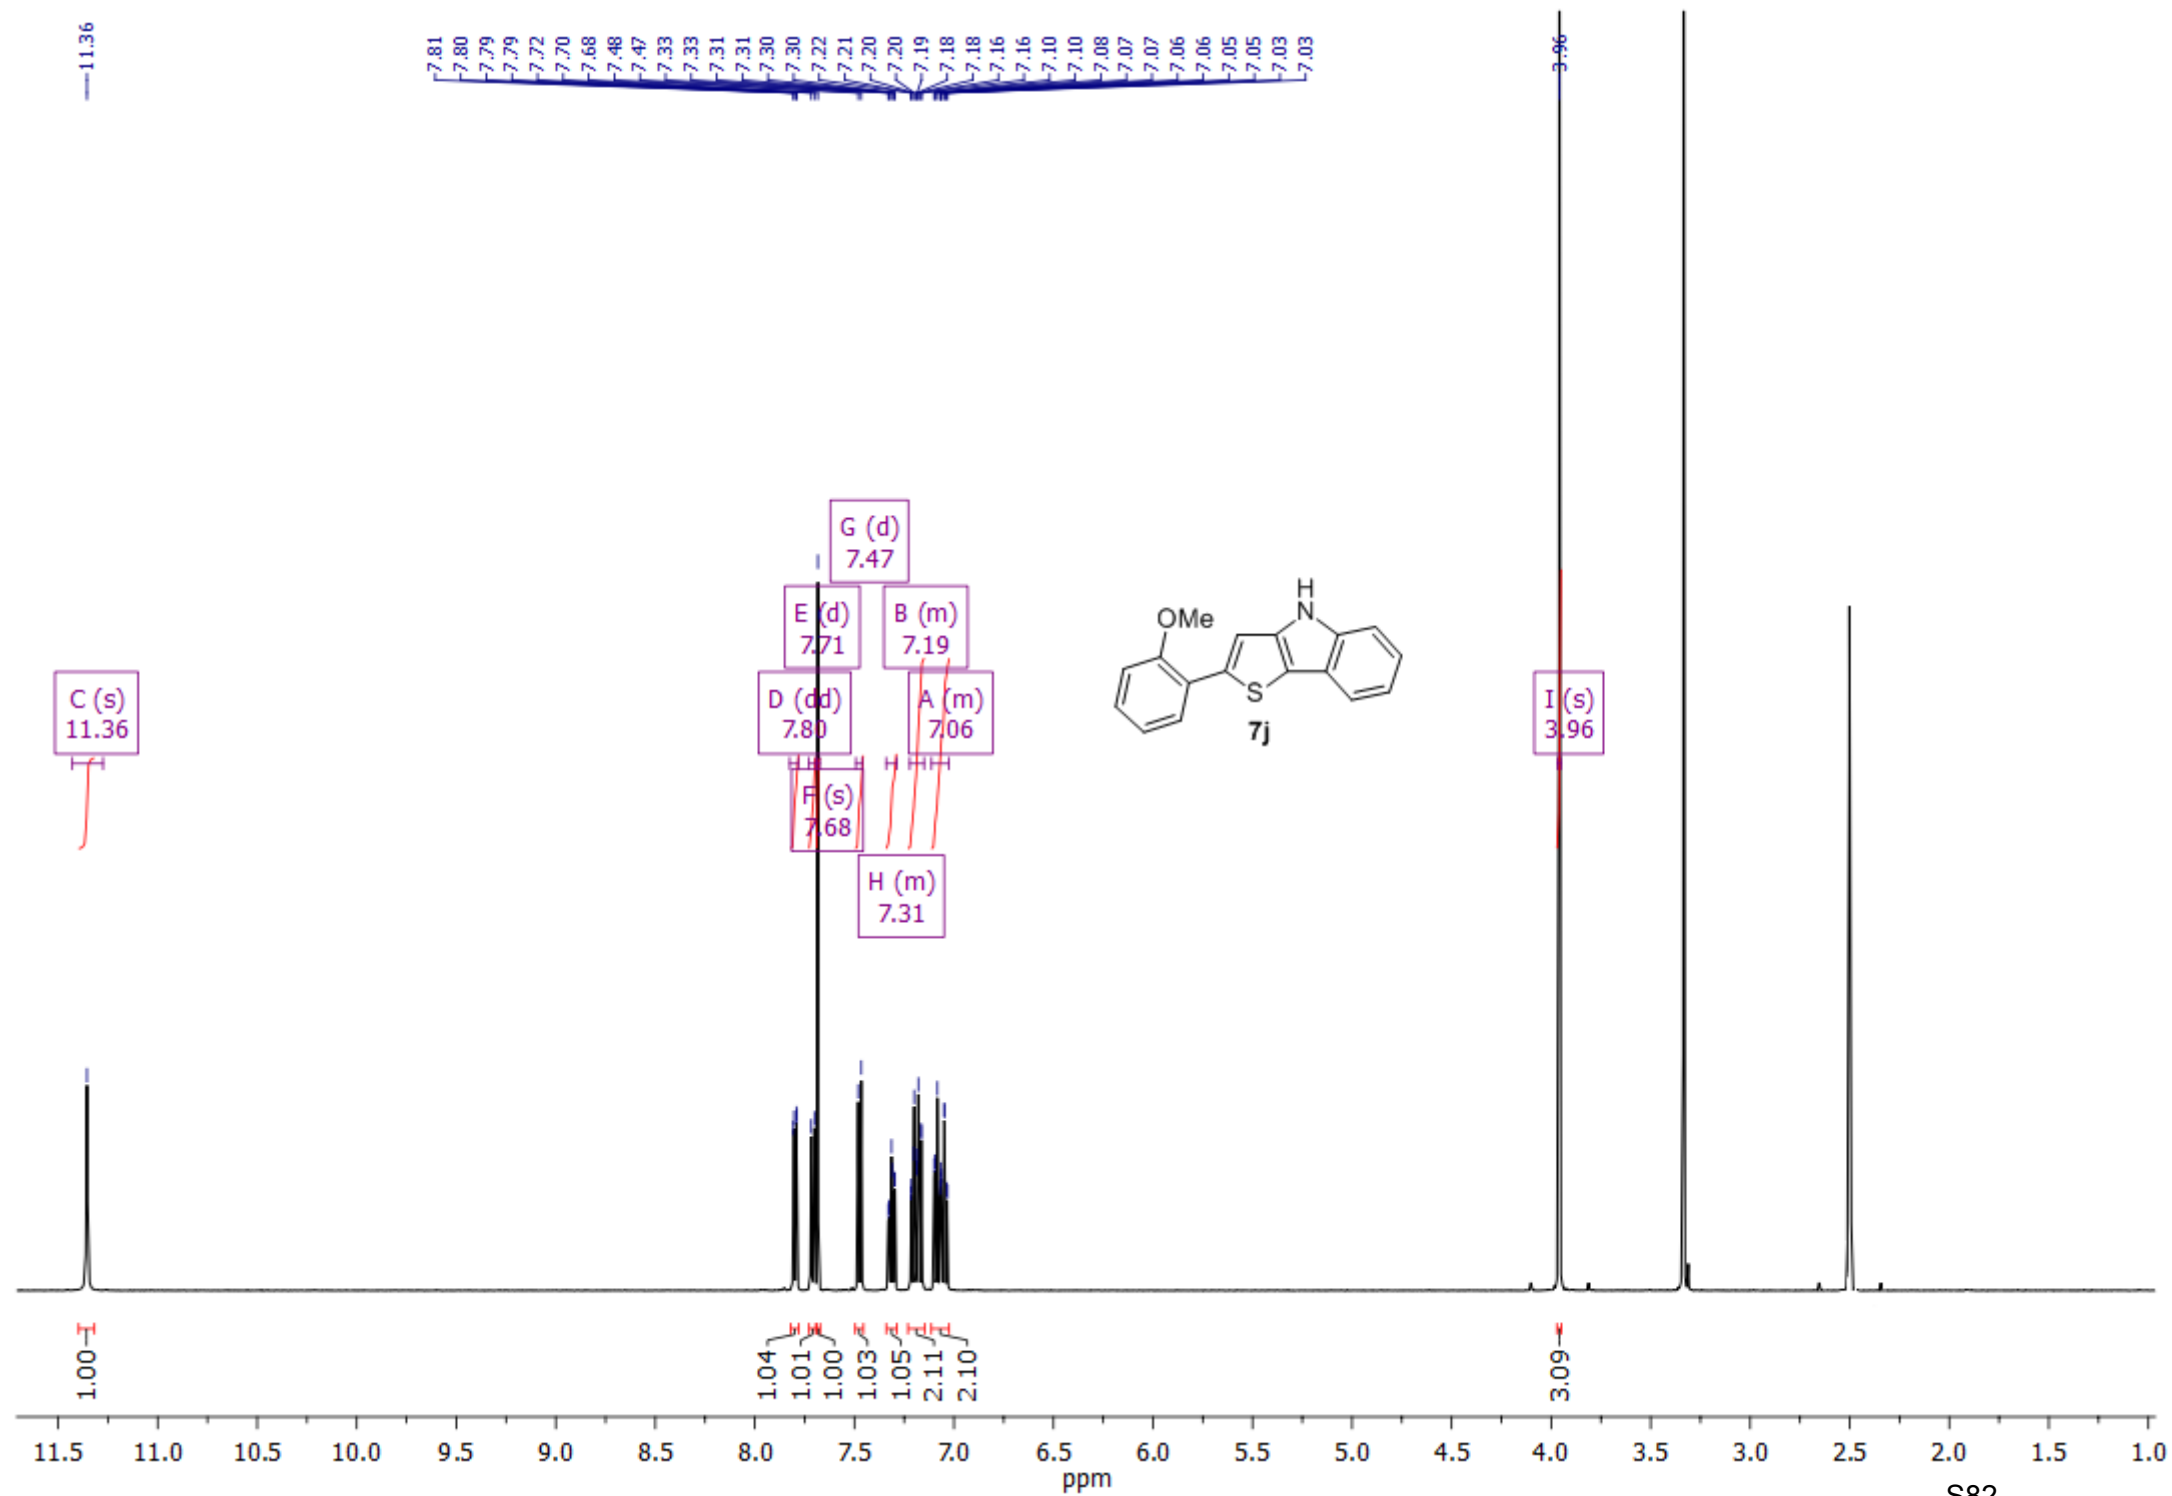

155.2  
143.4  
141.0  
140.1  
128.5  
127.7  
123.3  
122.3  
121.3  
121.0  
118.9  
118.3  
116.0  
112.3  
112.1  
110.3

55.7

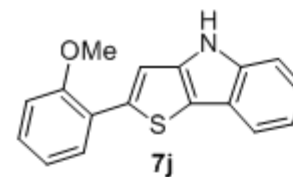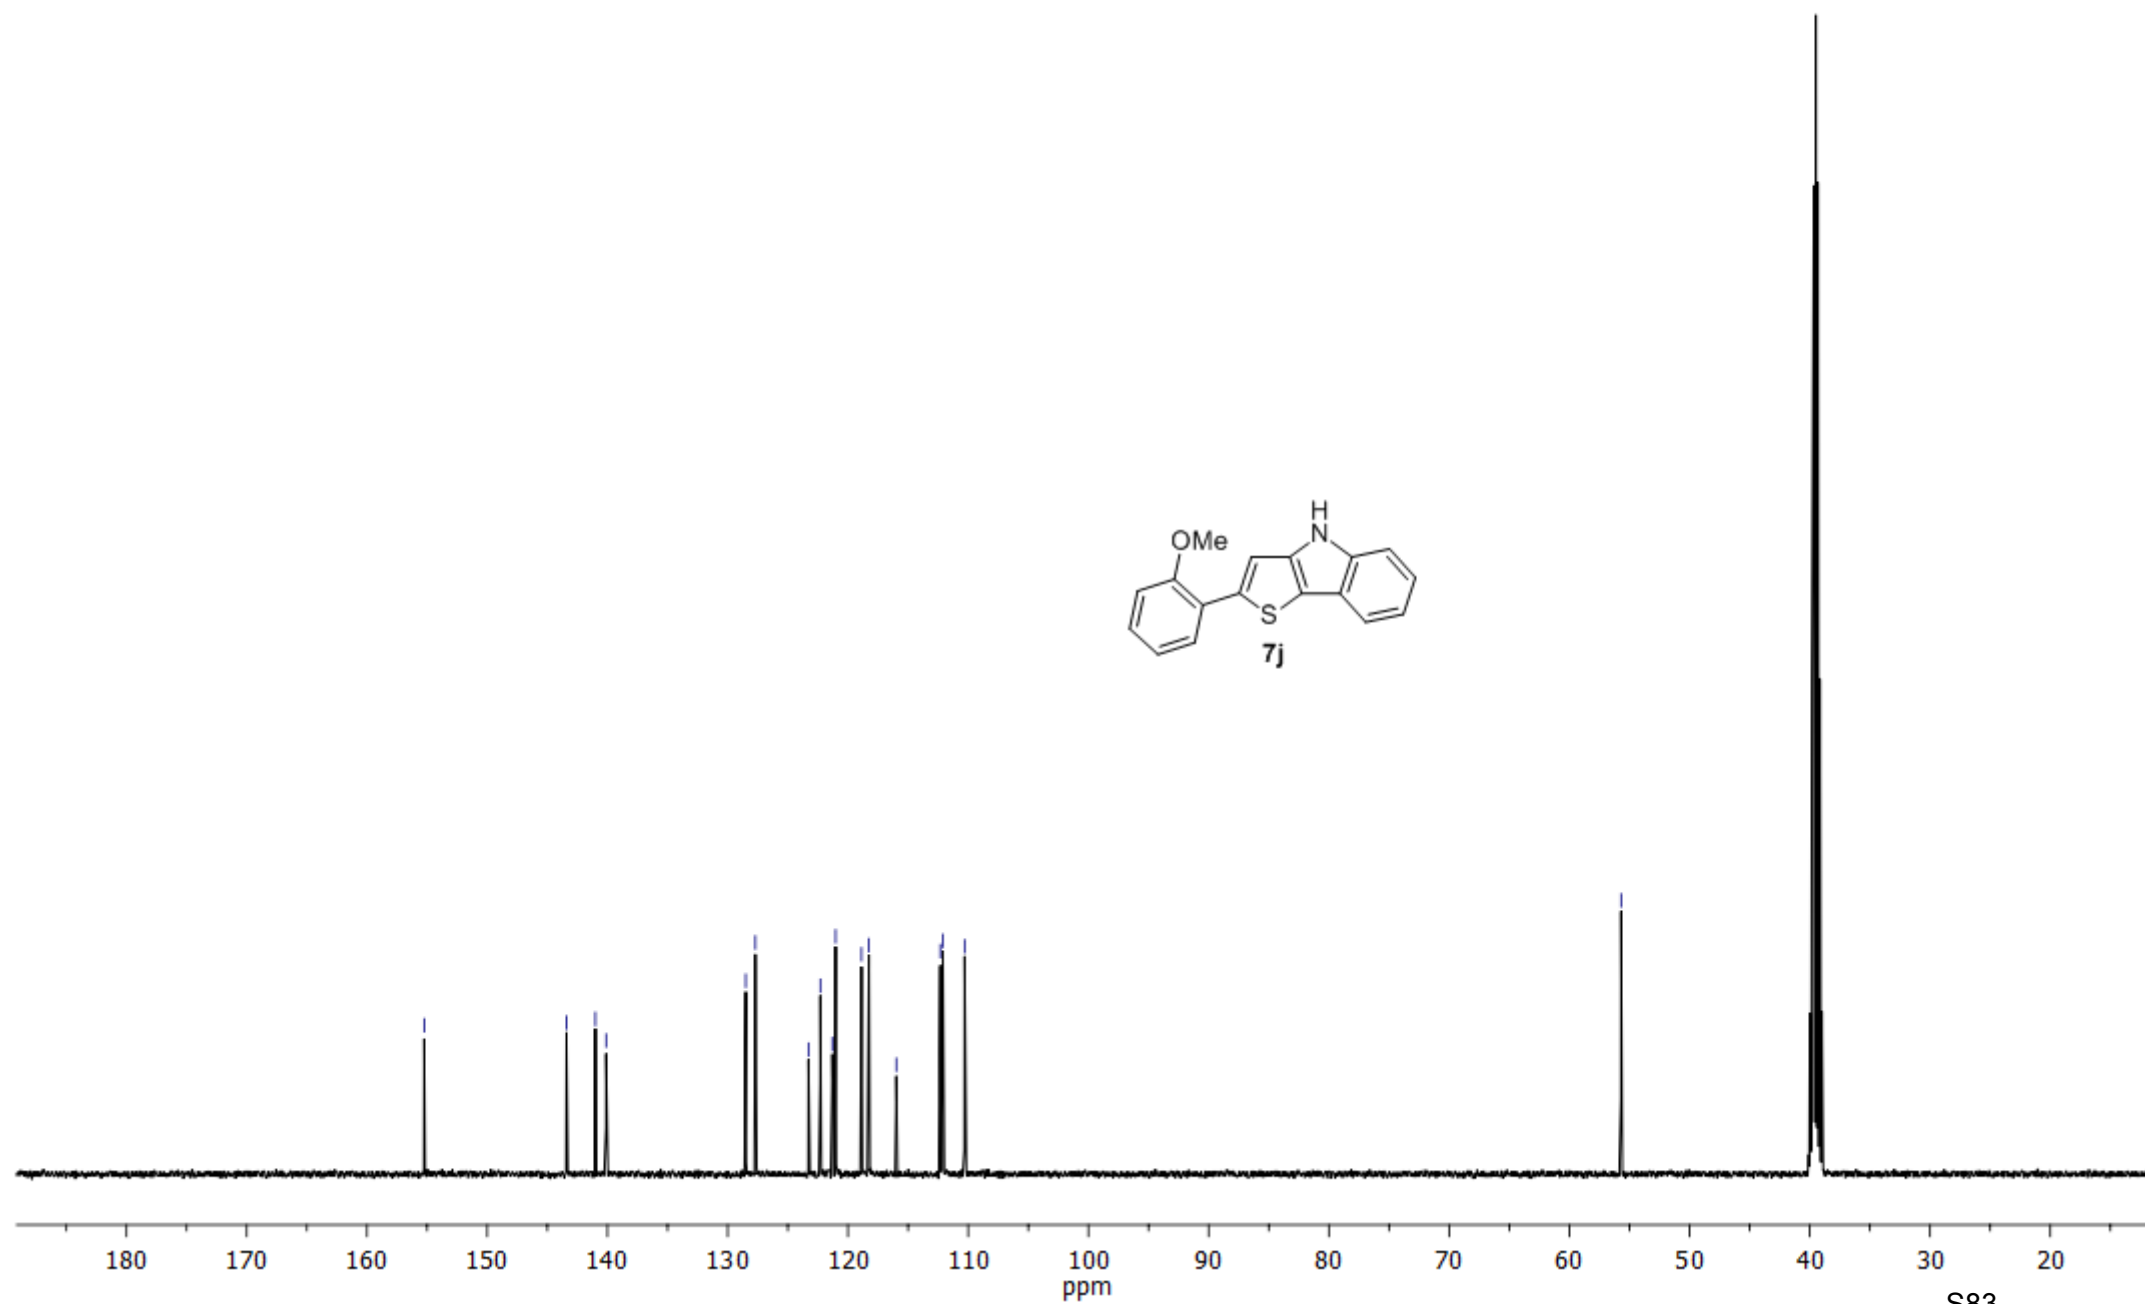

<sup>1</sup>H NMR (solvent: DMSO-*d*<sub>6</sub>)

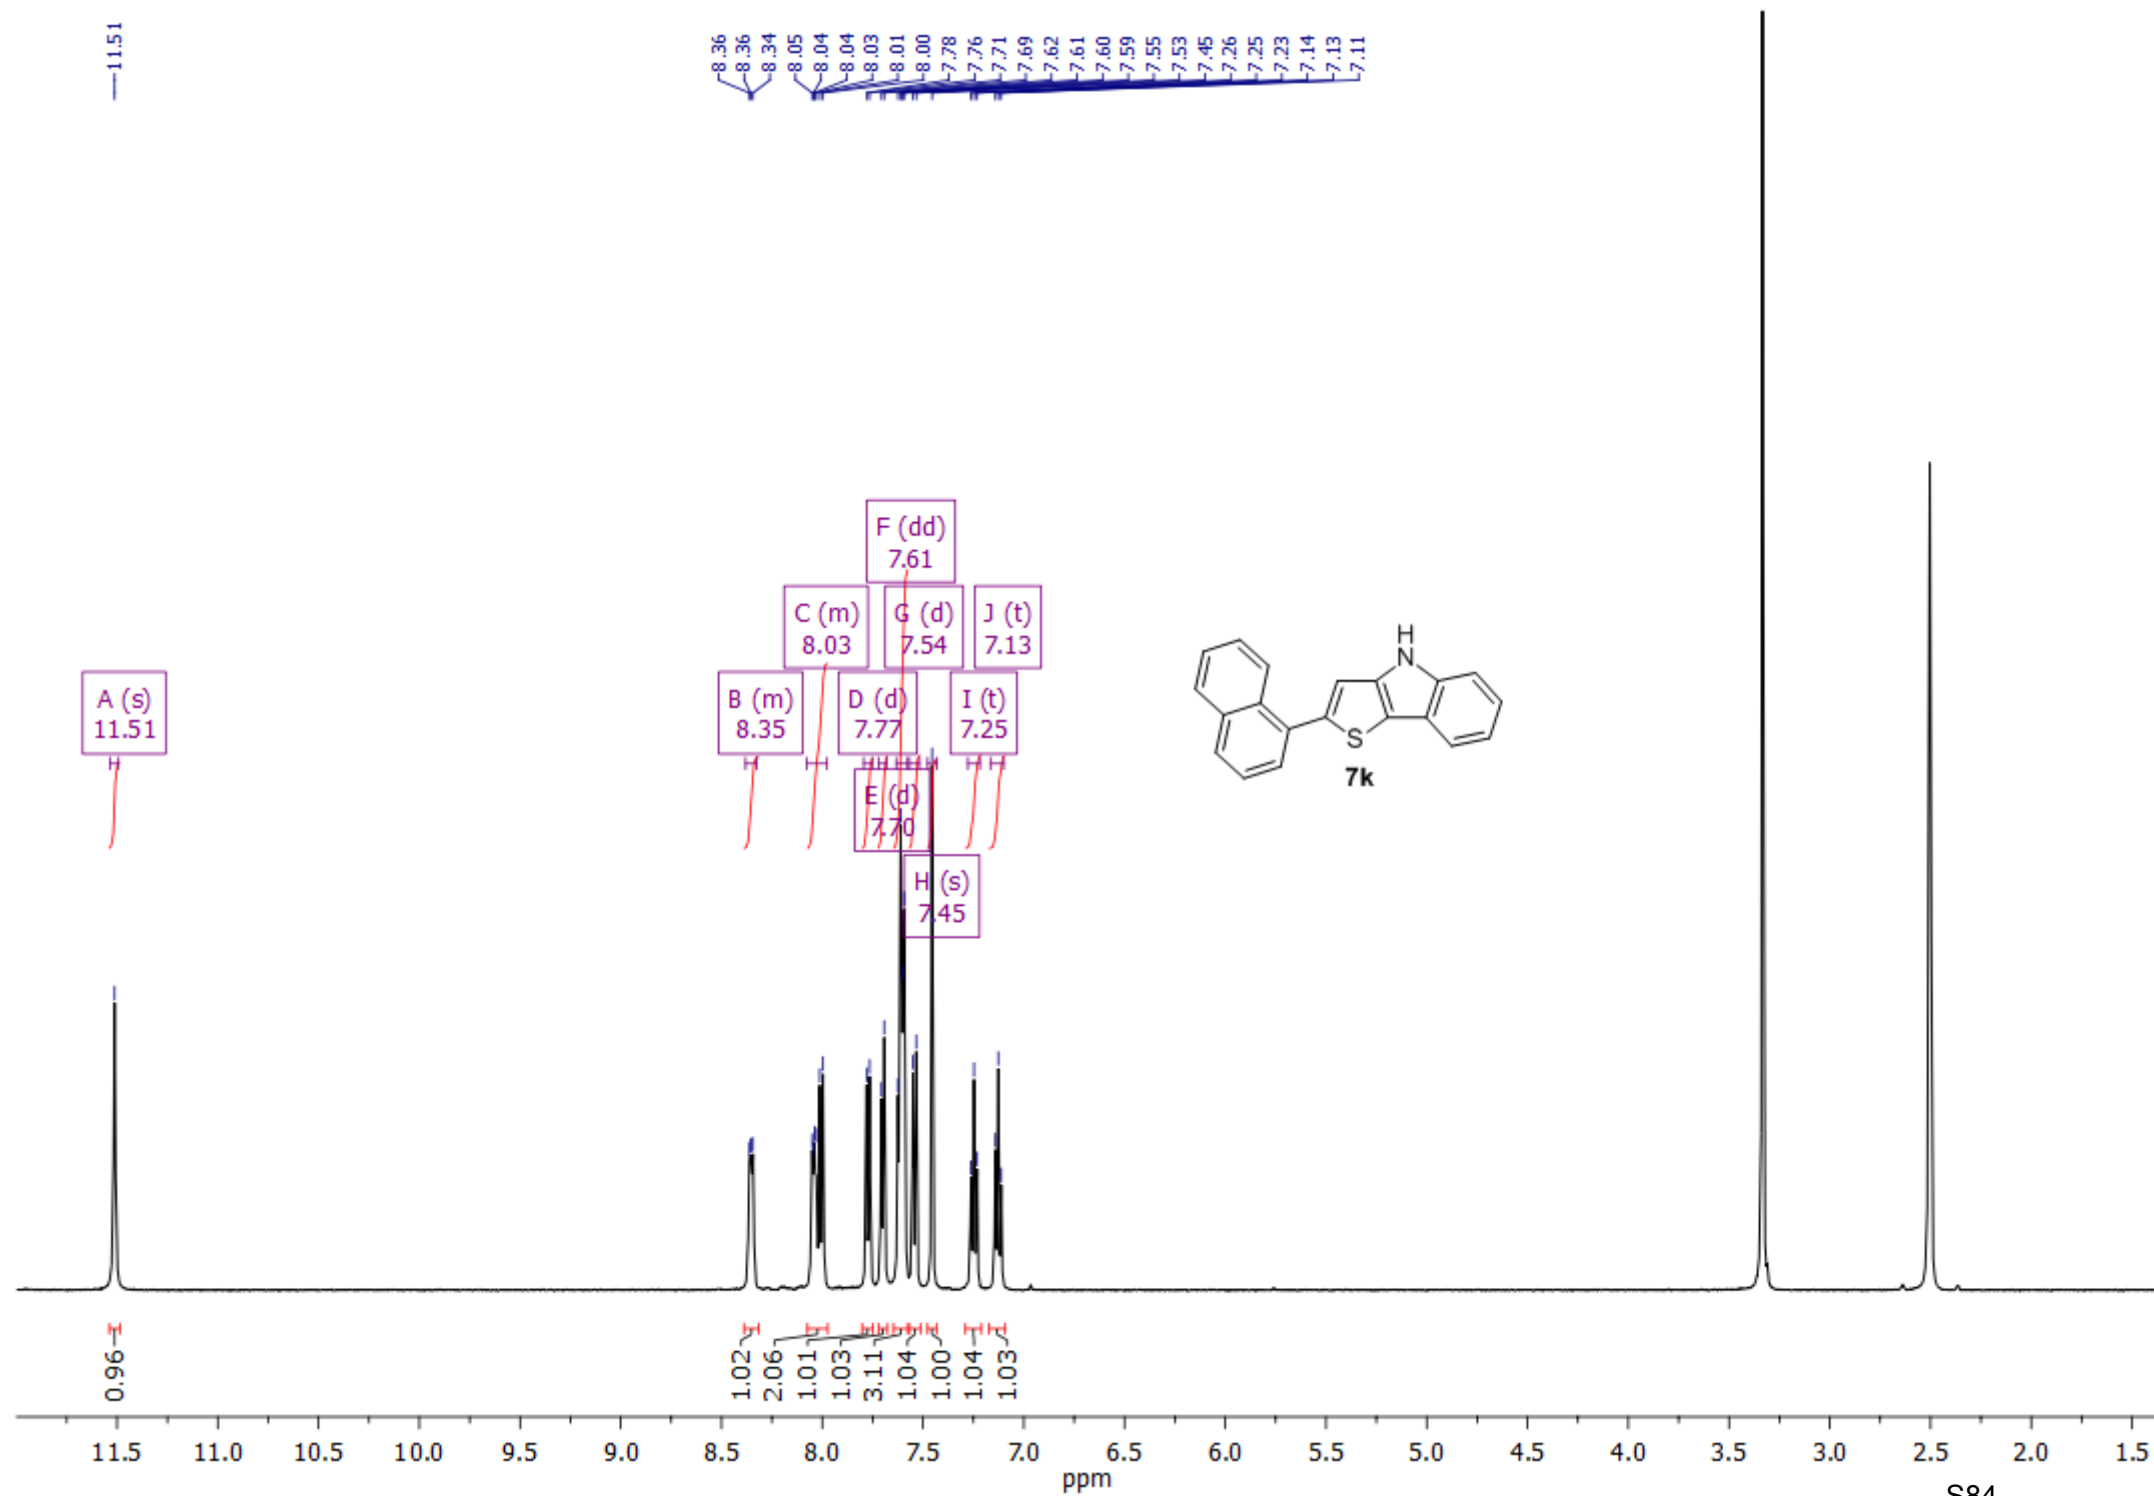

$^{13}\text{C}$  NMR (solvent:  $\text{DMSO-}d_6$ )

143.4  
141.7  
140.7  
133.6  
132.7  
130.9  
128.5  
128.1  
126.9  
126.3  
125.5  
125.1  
122.5  
121.2  
119.0  
118.4  
115.7  
112.9  
112.3

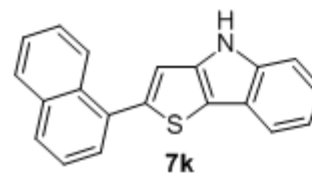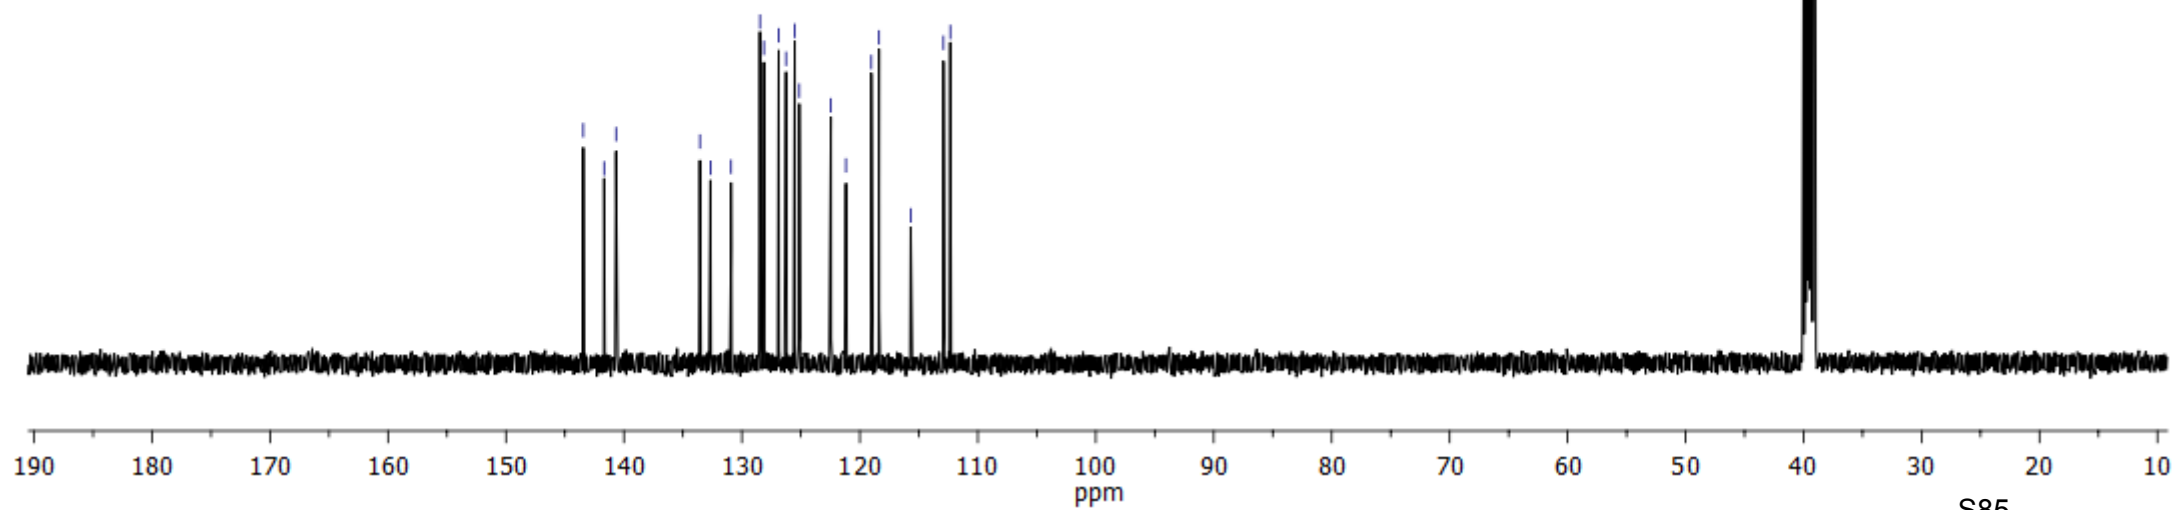

<sup>1</sup>H NMR (solvent: DMSO-*d*<sub>6</sub>)

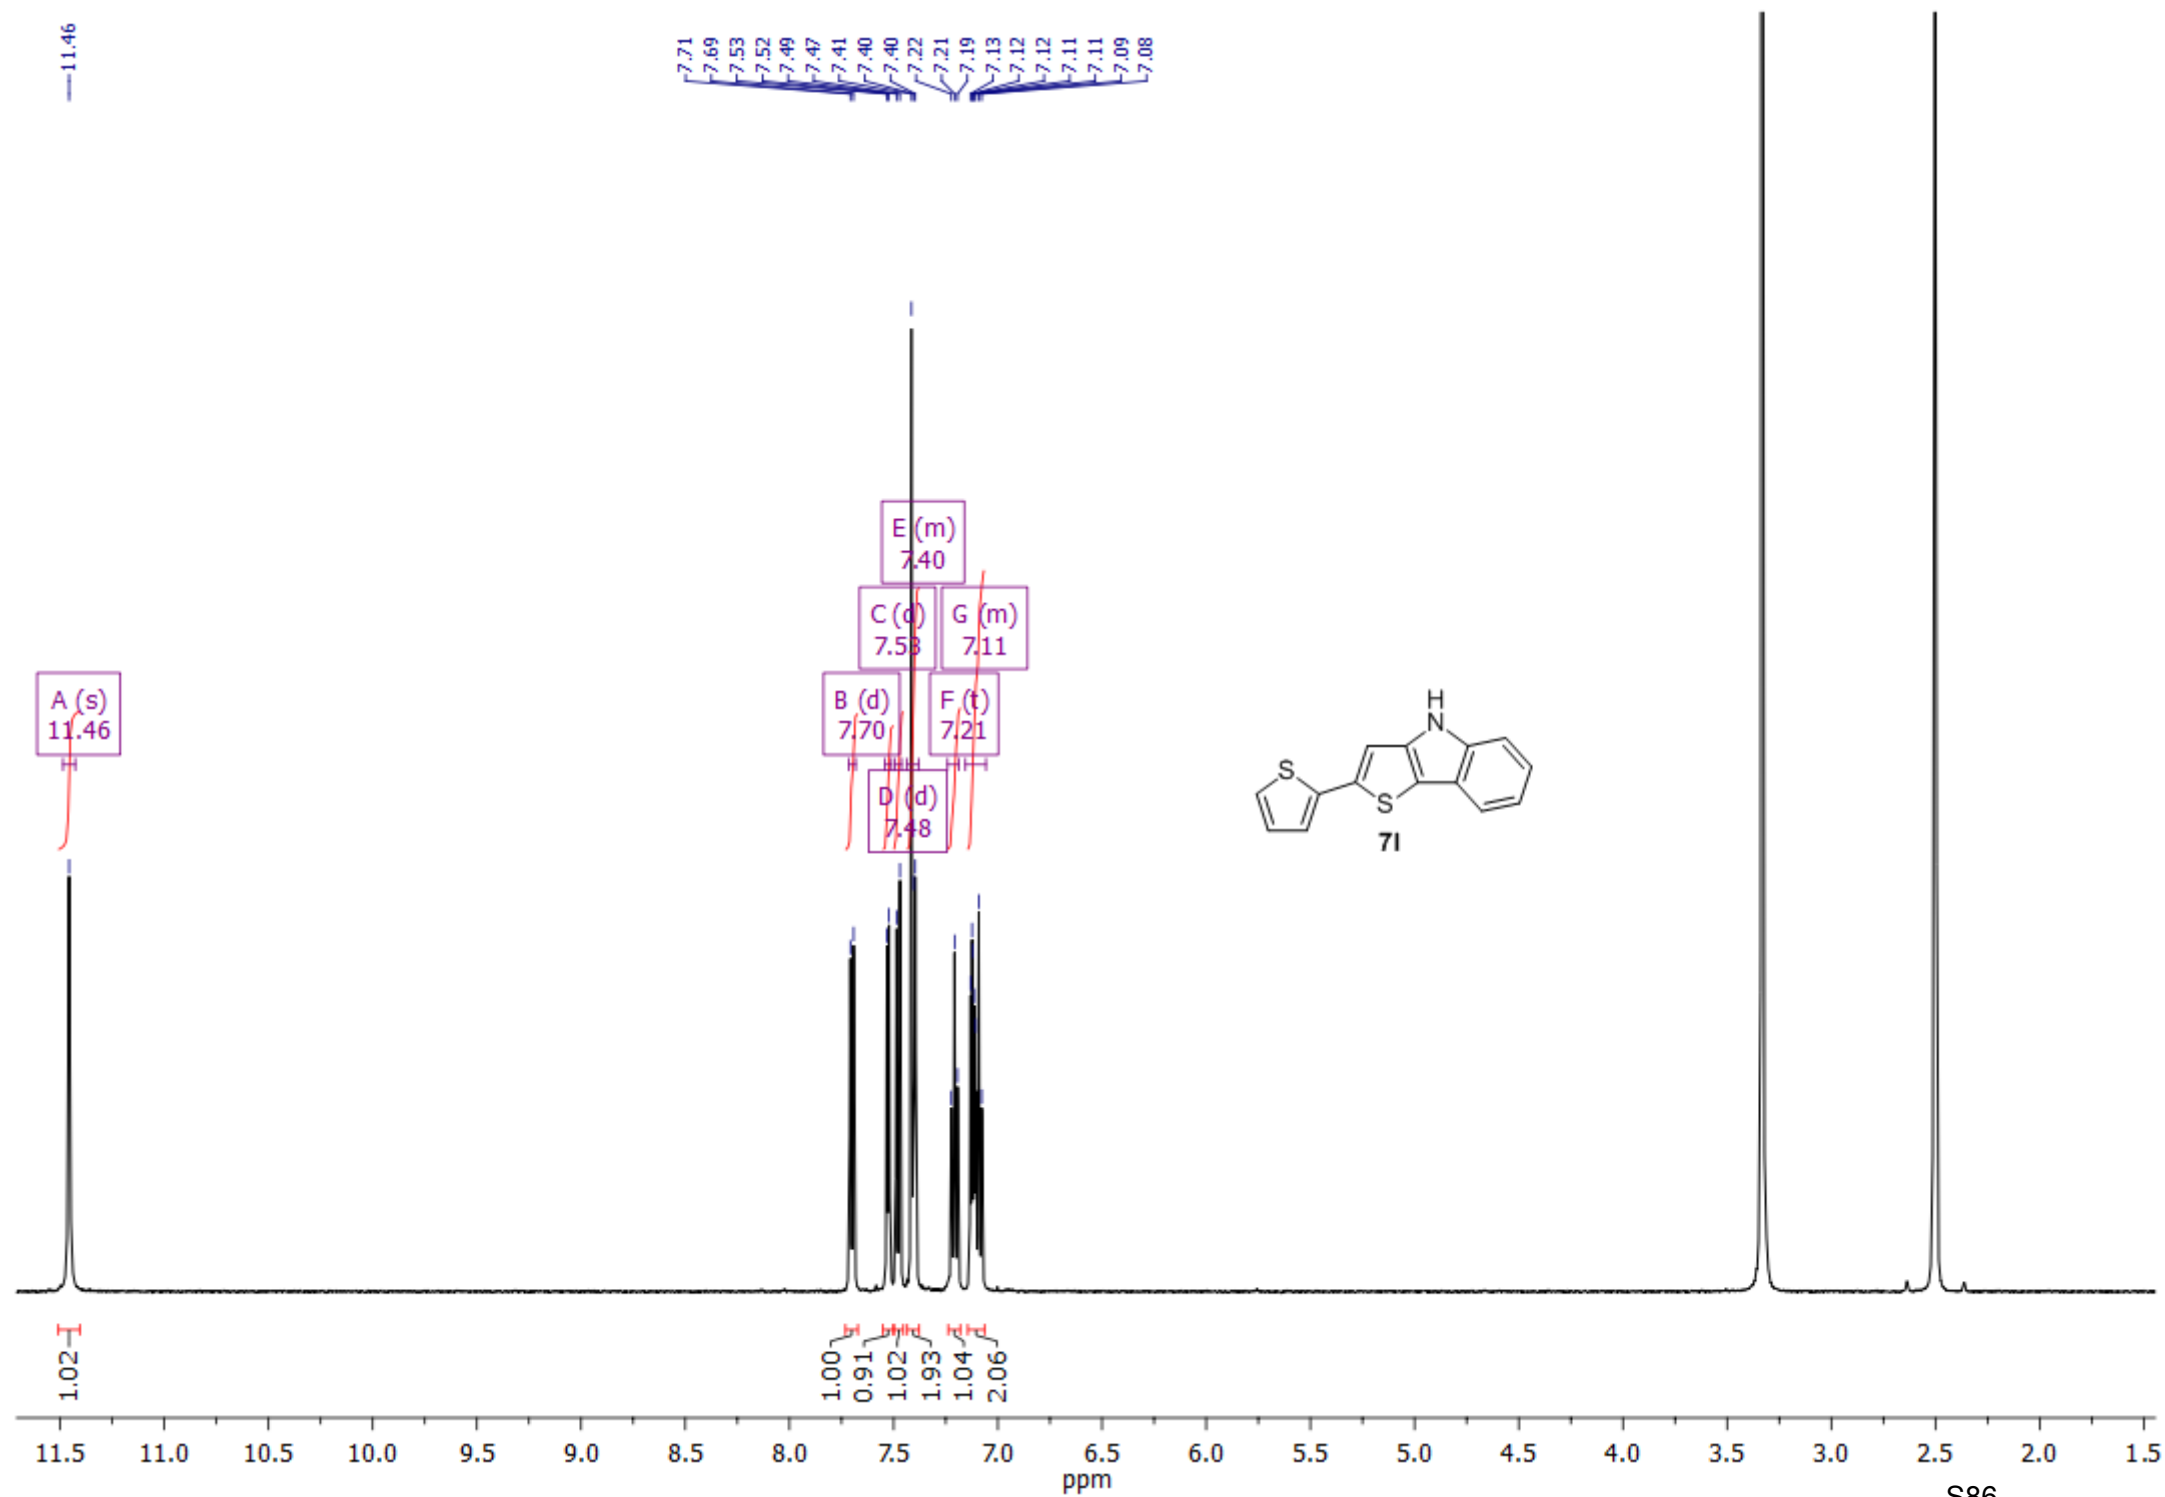

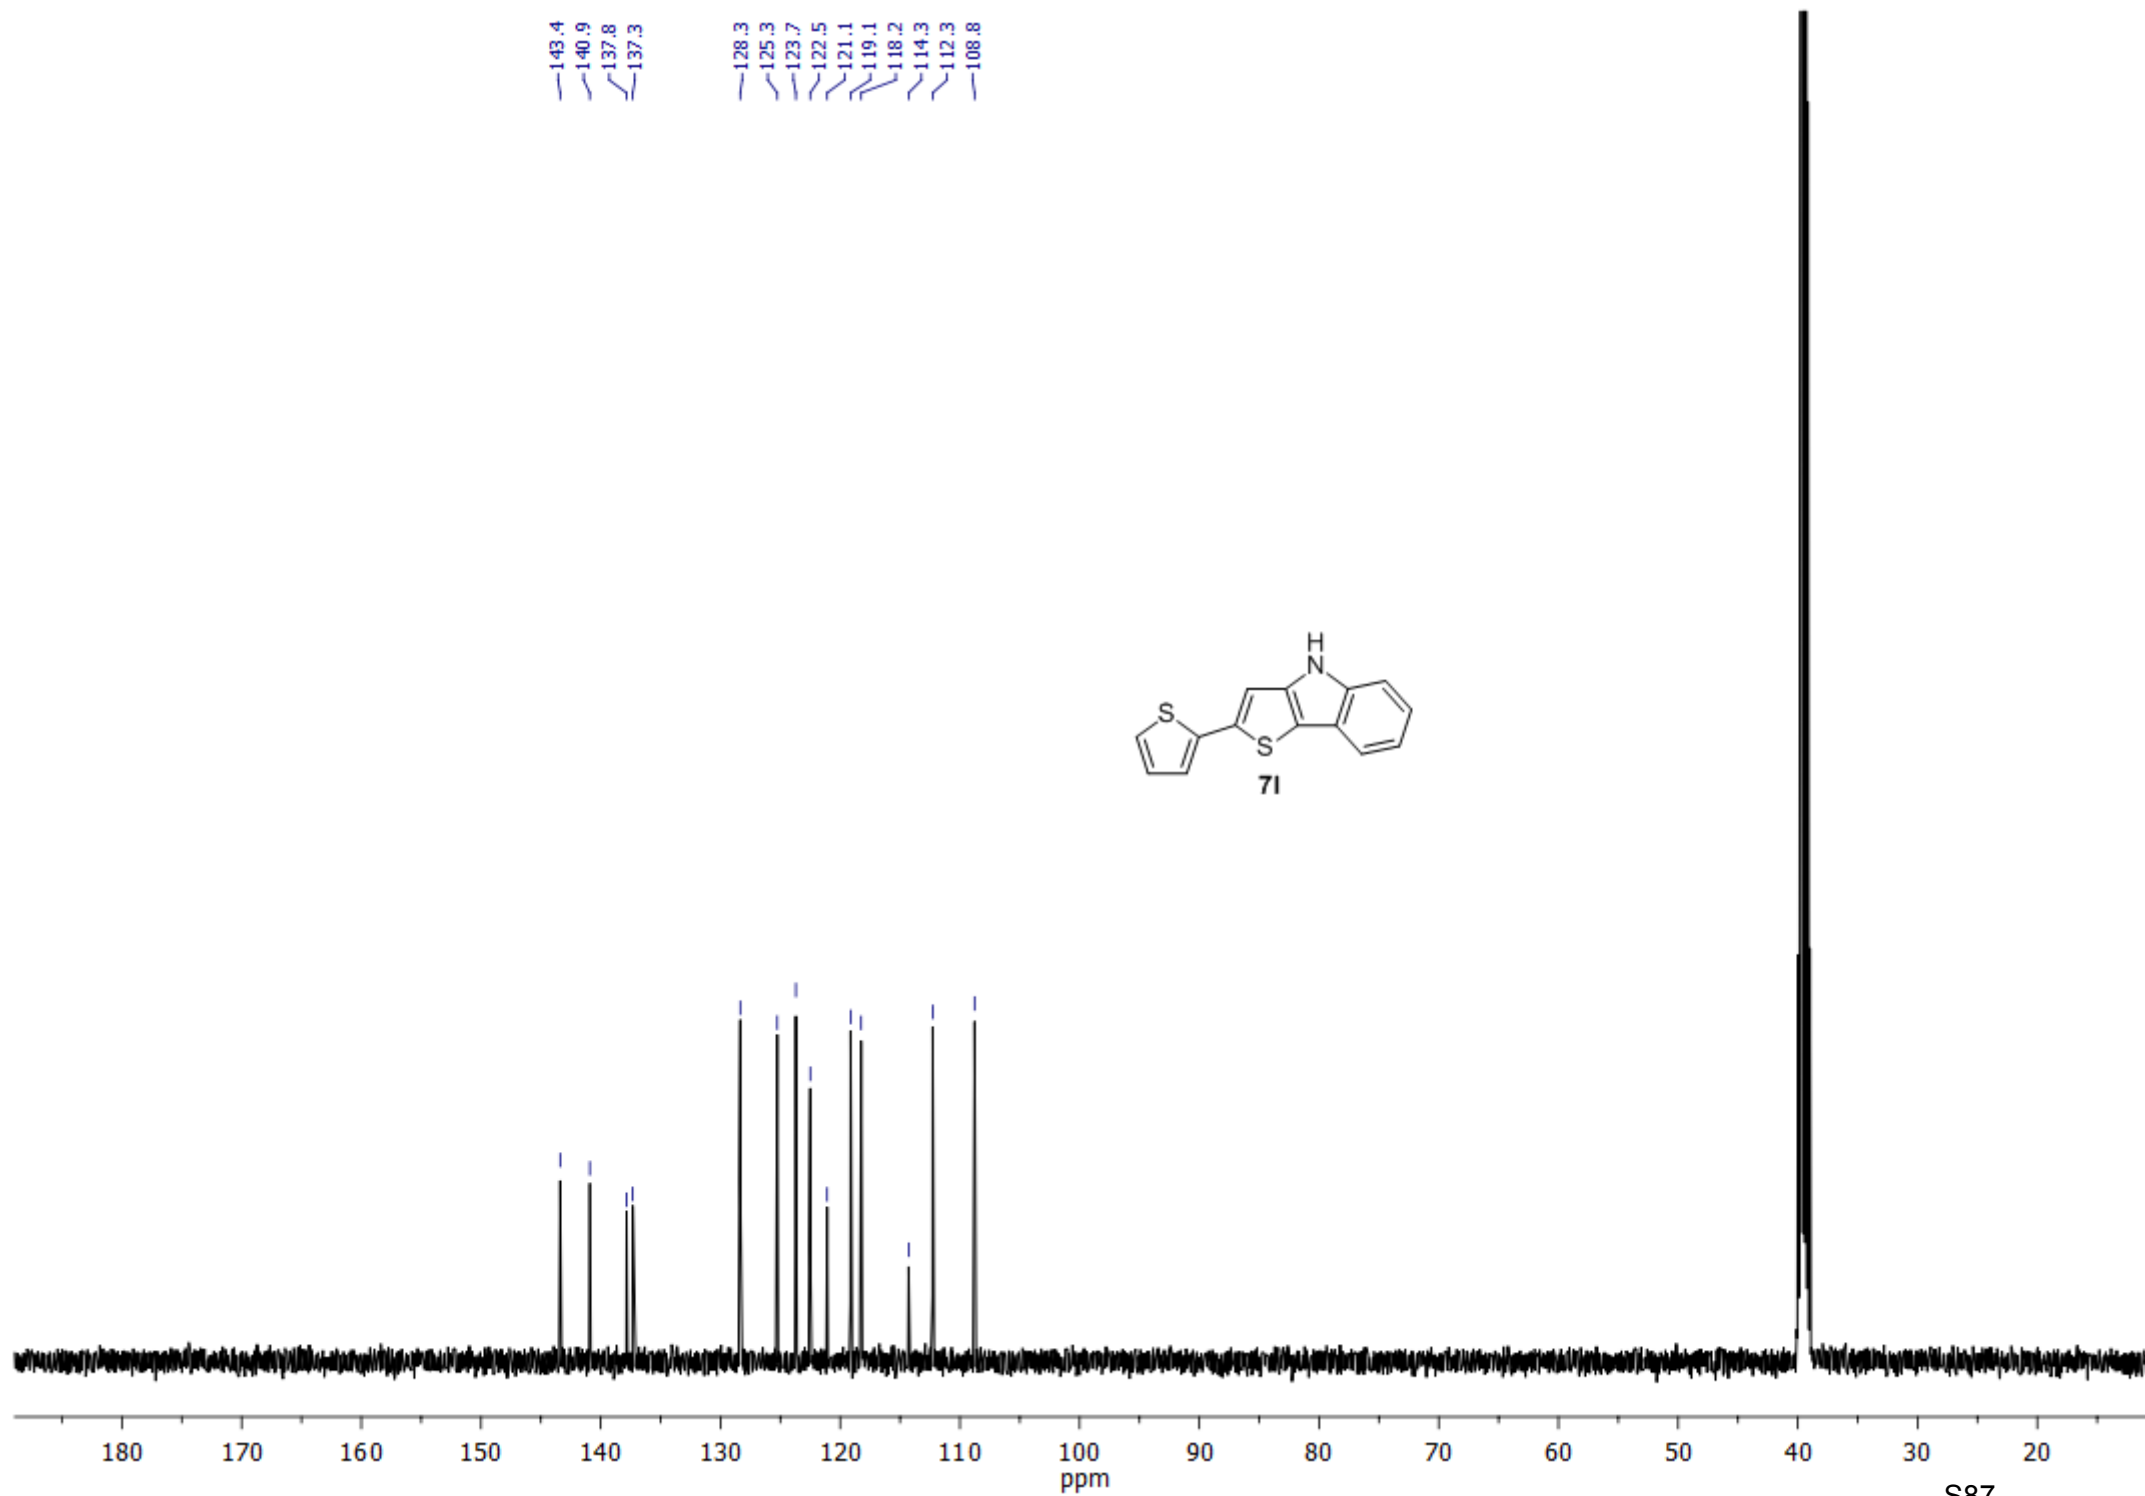

<sup>1</sup>H NMR (solvent: DMSO-*d*<sub>6</sub>)

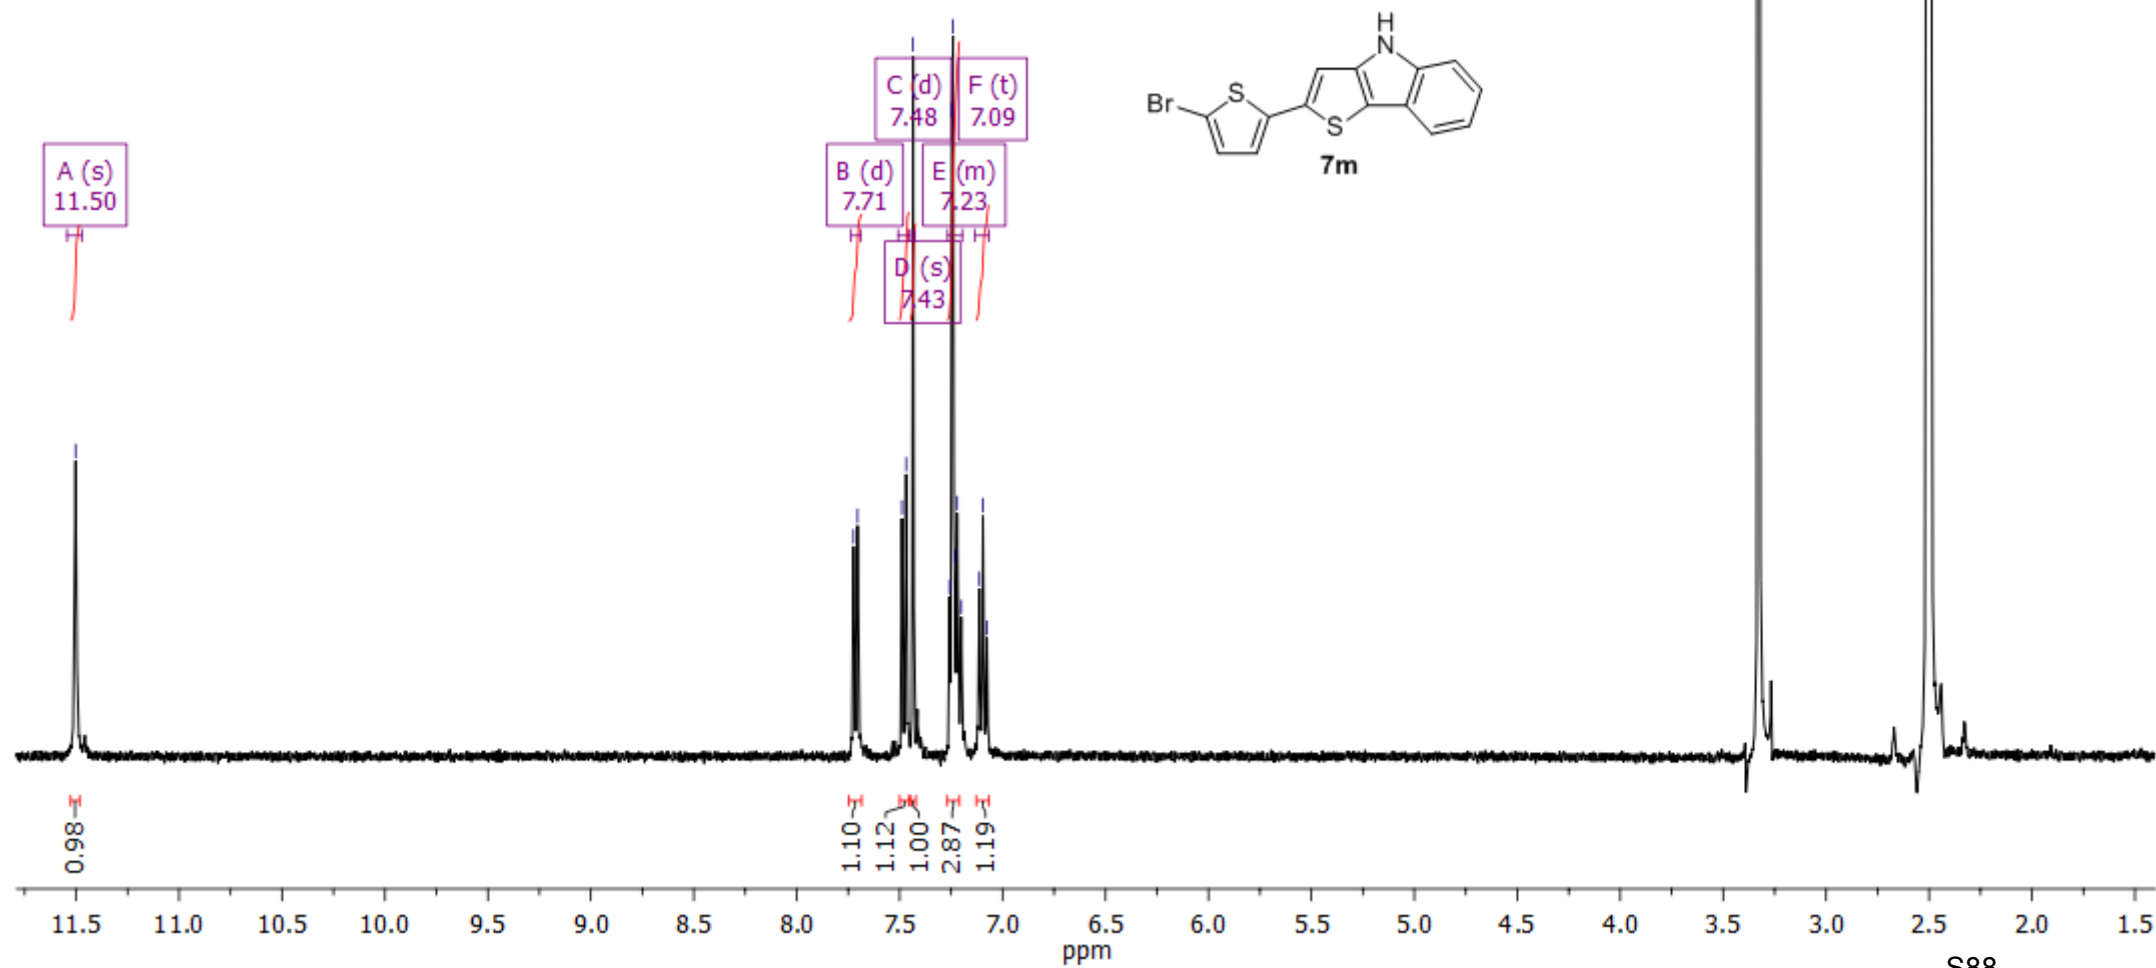



143.3  
141.1  
139.6  
135.8  
131.6  
124.2  
122.8  
121.0  
119.2  
118.4  
114.7  
112.3  
109.9  
109.4

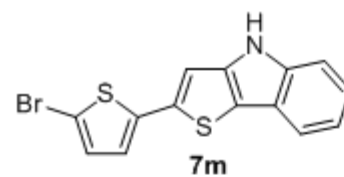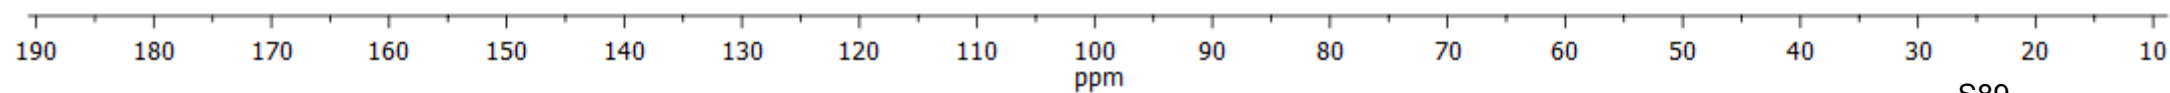

<sup>1</sup>H NMR (solvent: DMSO-*d*<sub>6</sub>)

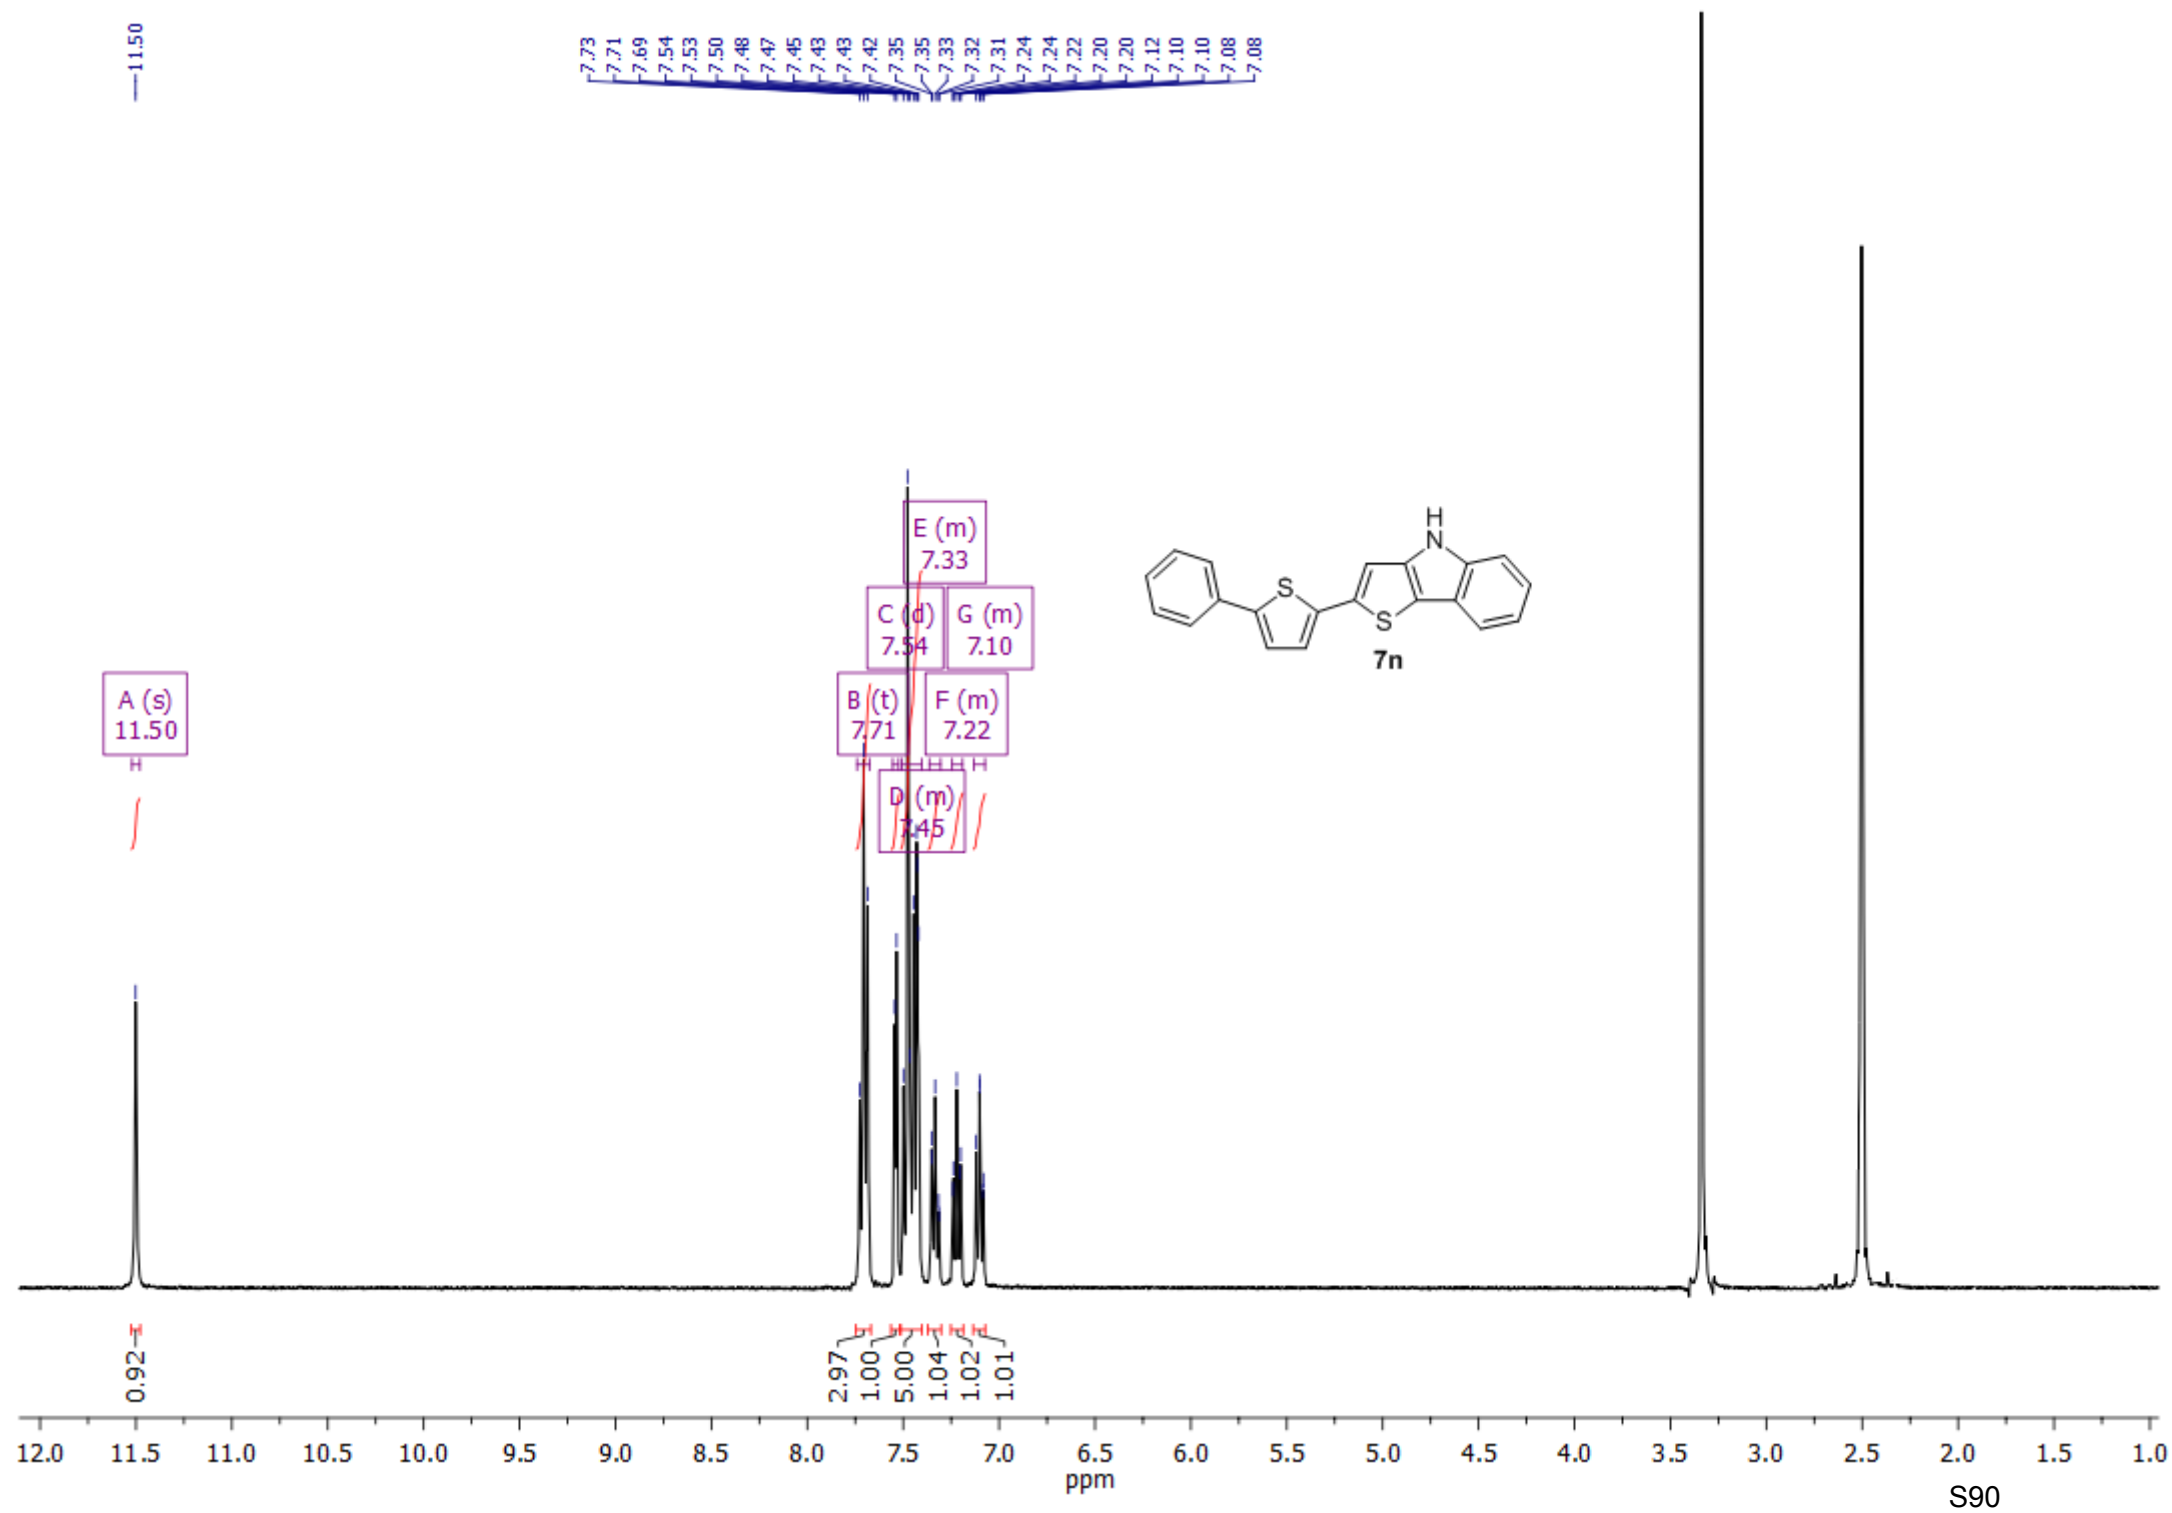

<sup>13</sup>C NMR (solvent: DMSO-*d*<sub>6</sub>)

143.5  
141.9  
141.0  
137.2  
137.0  
133.2  
129.2  
127.8  
125.1  
124.8  
122.6  
121.1  
119.2  
118.3  
114.5  
112.3  
108.8

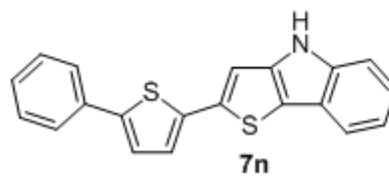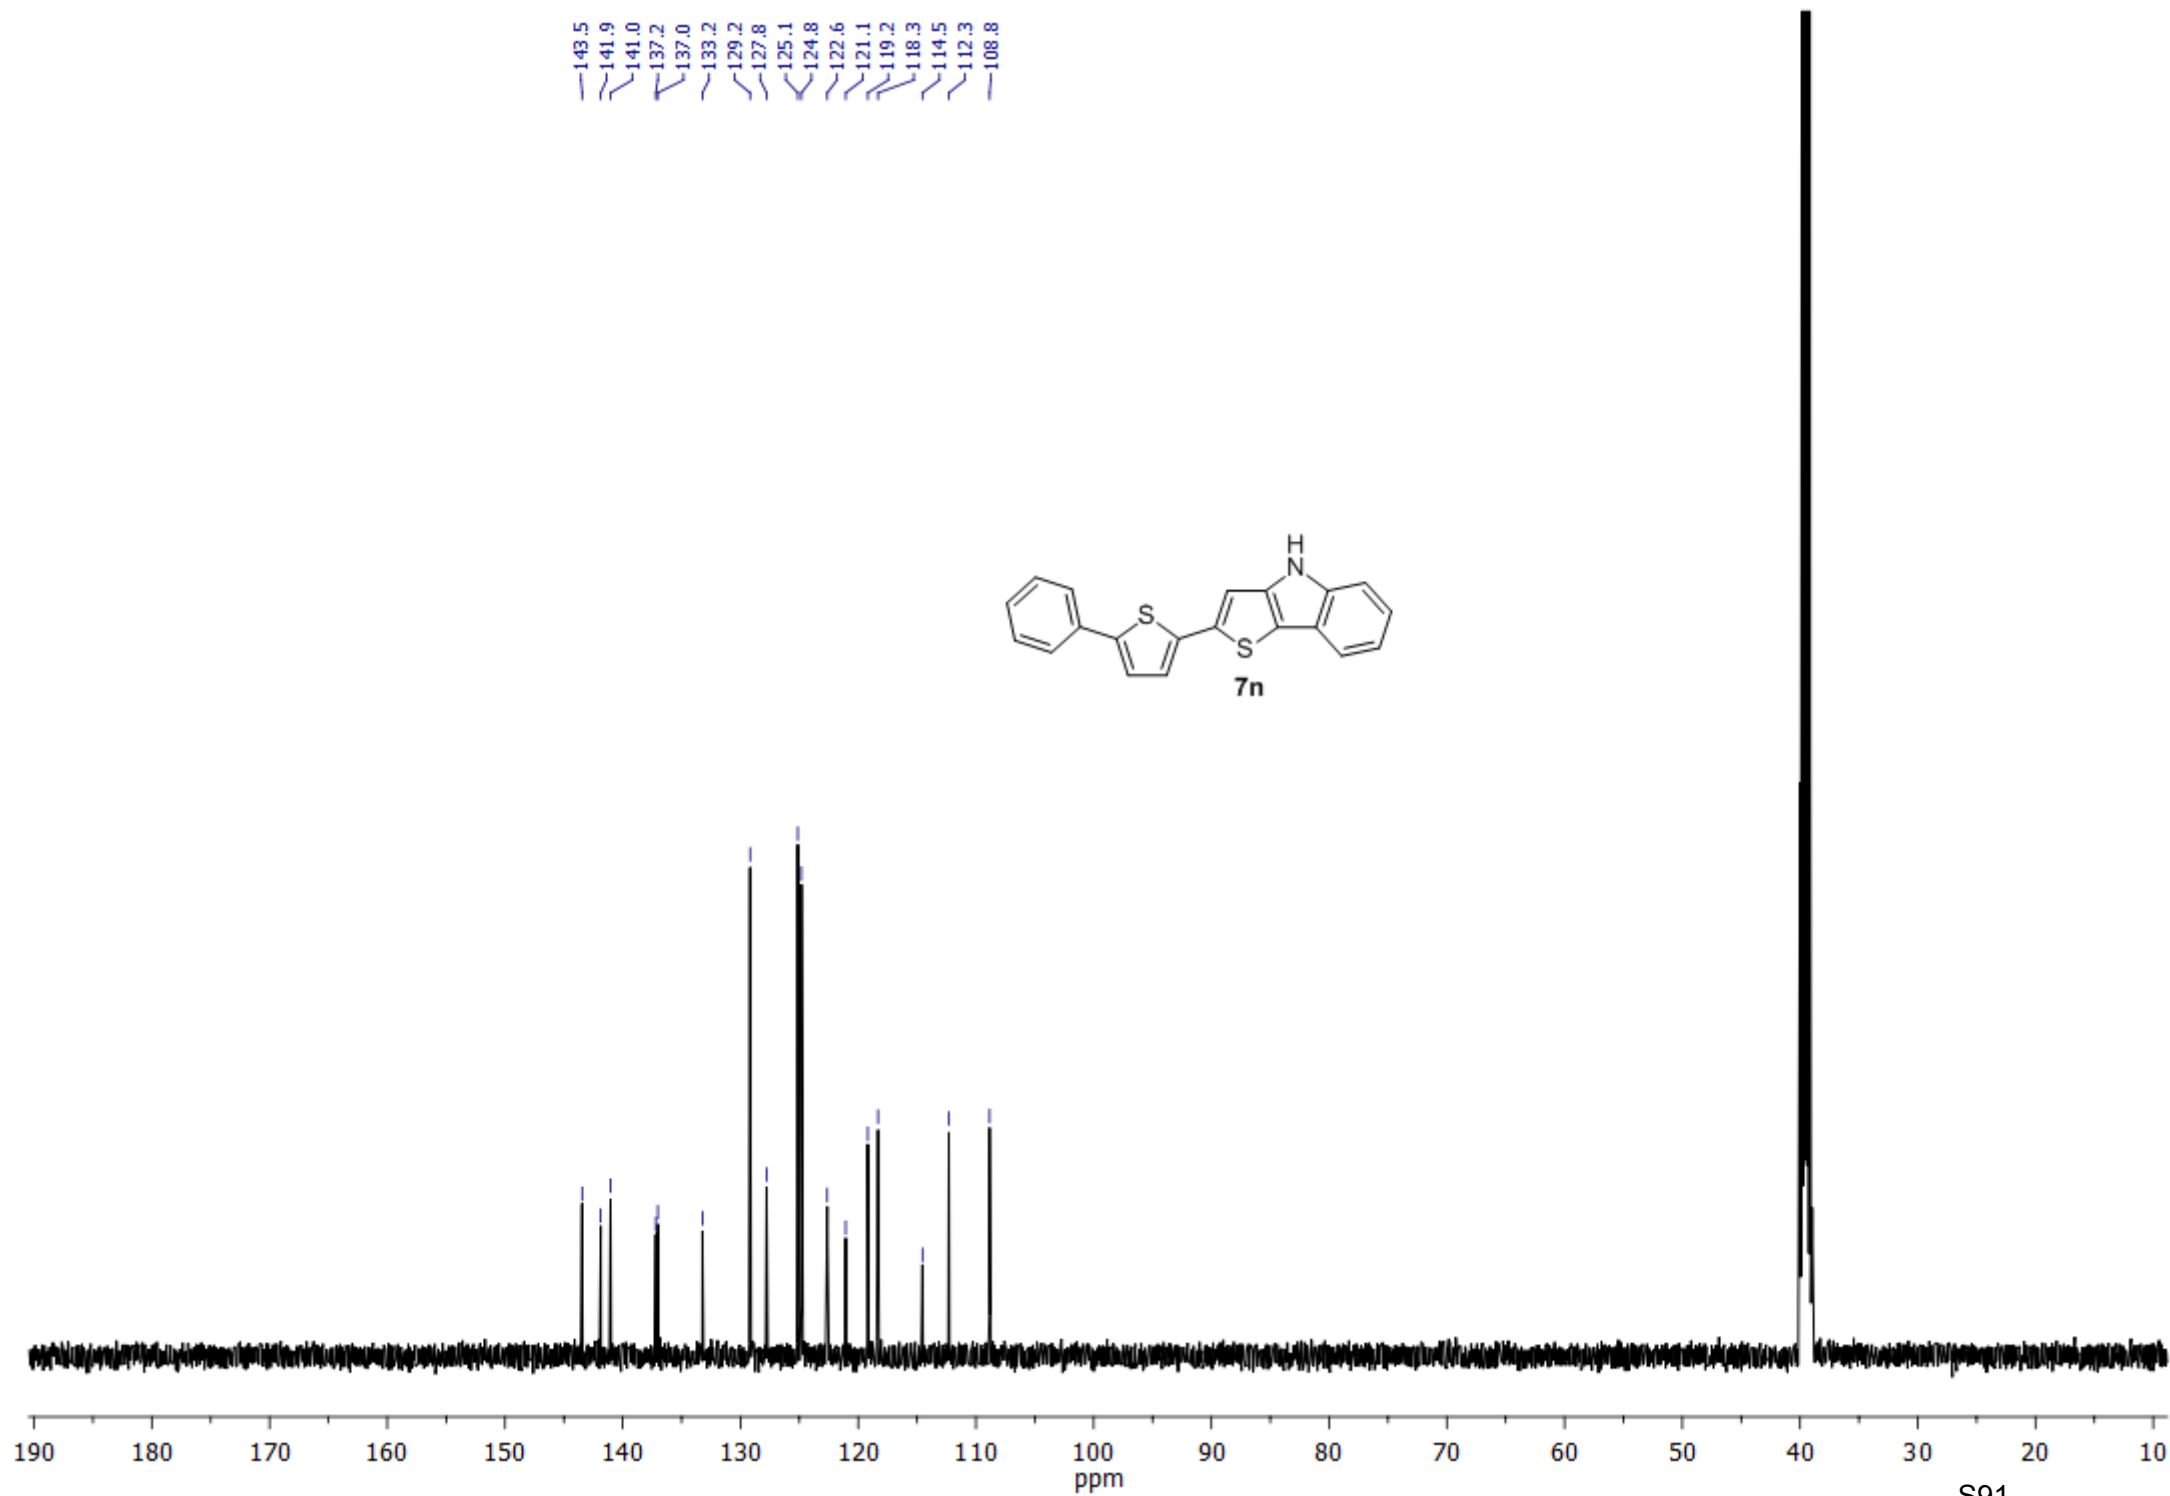

<sup>1</sup>H NMR (solvent: DMSO-*d*<sub>6</sub>)

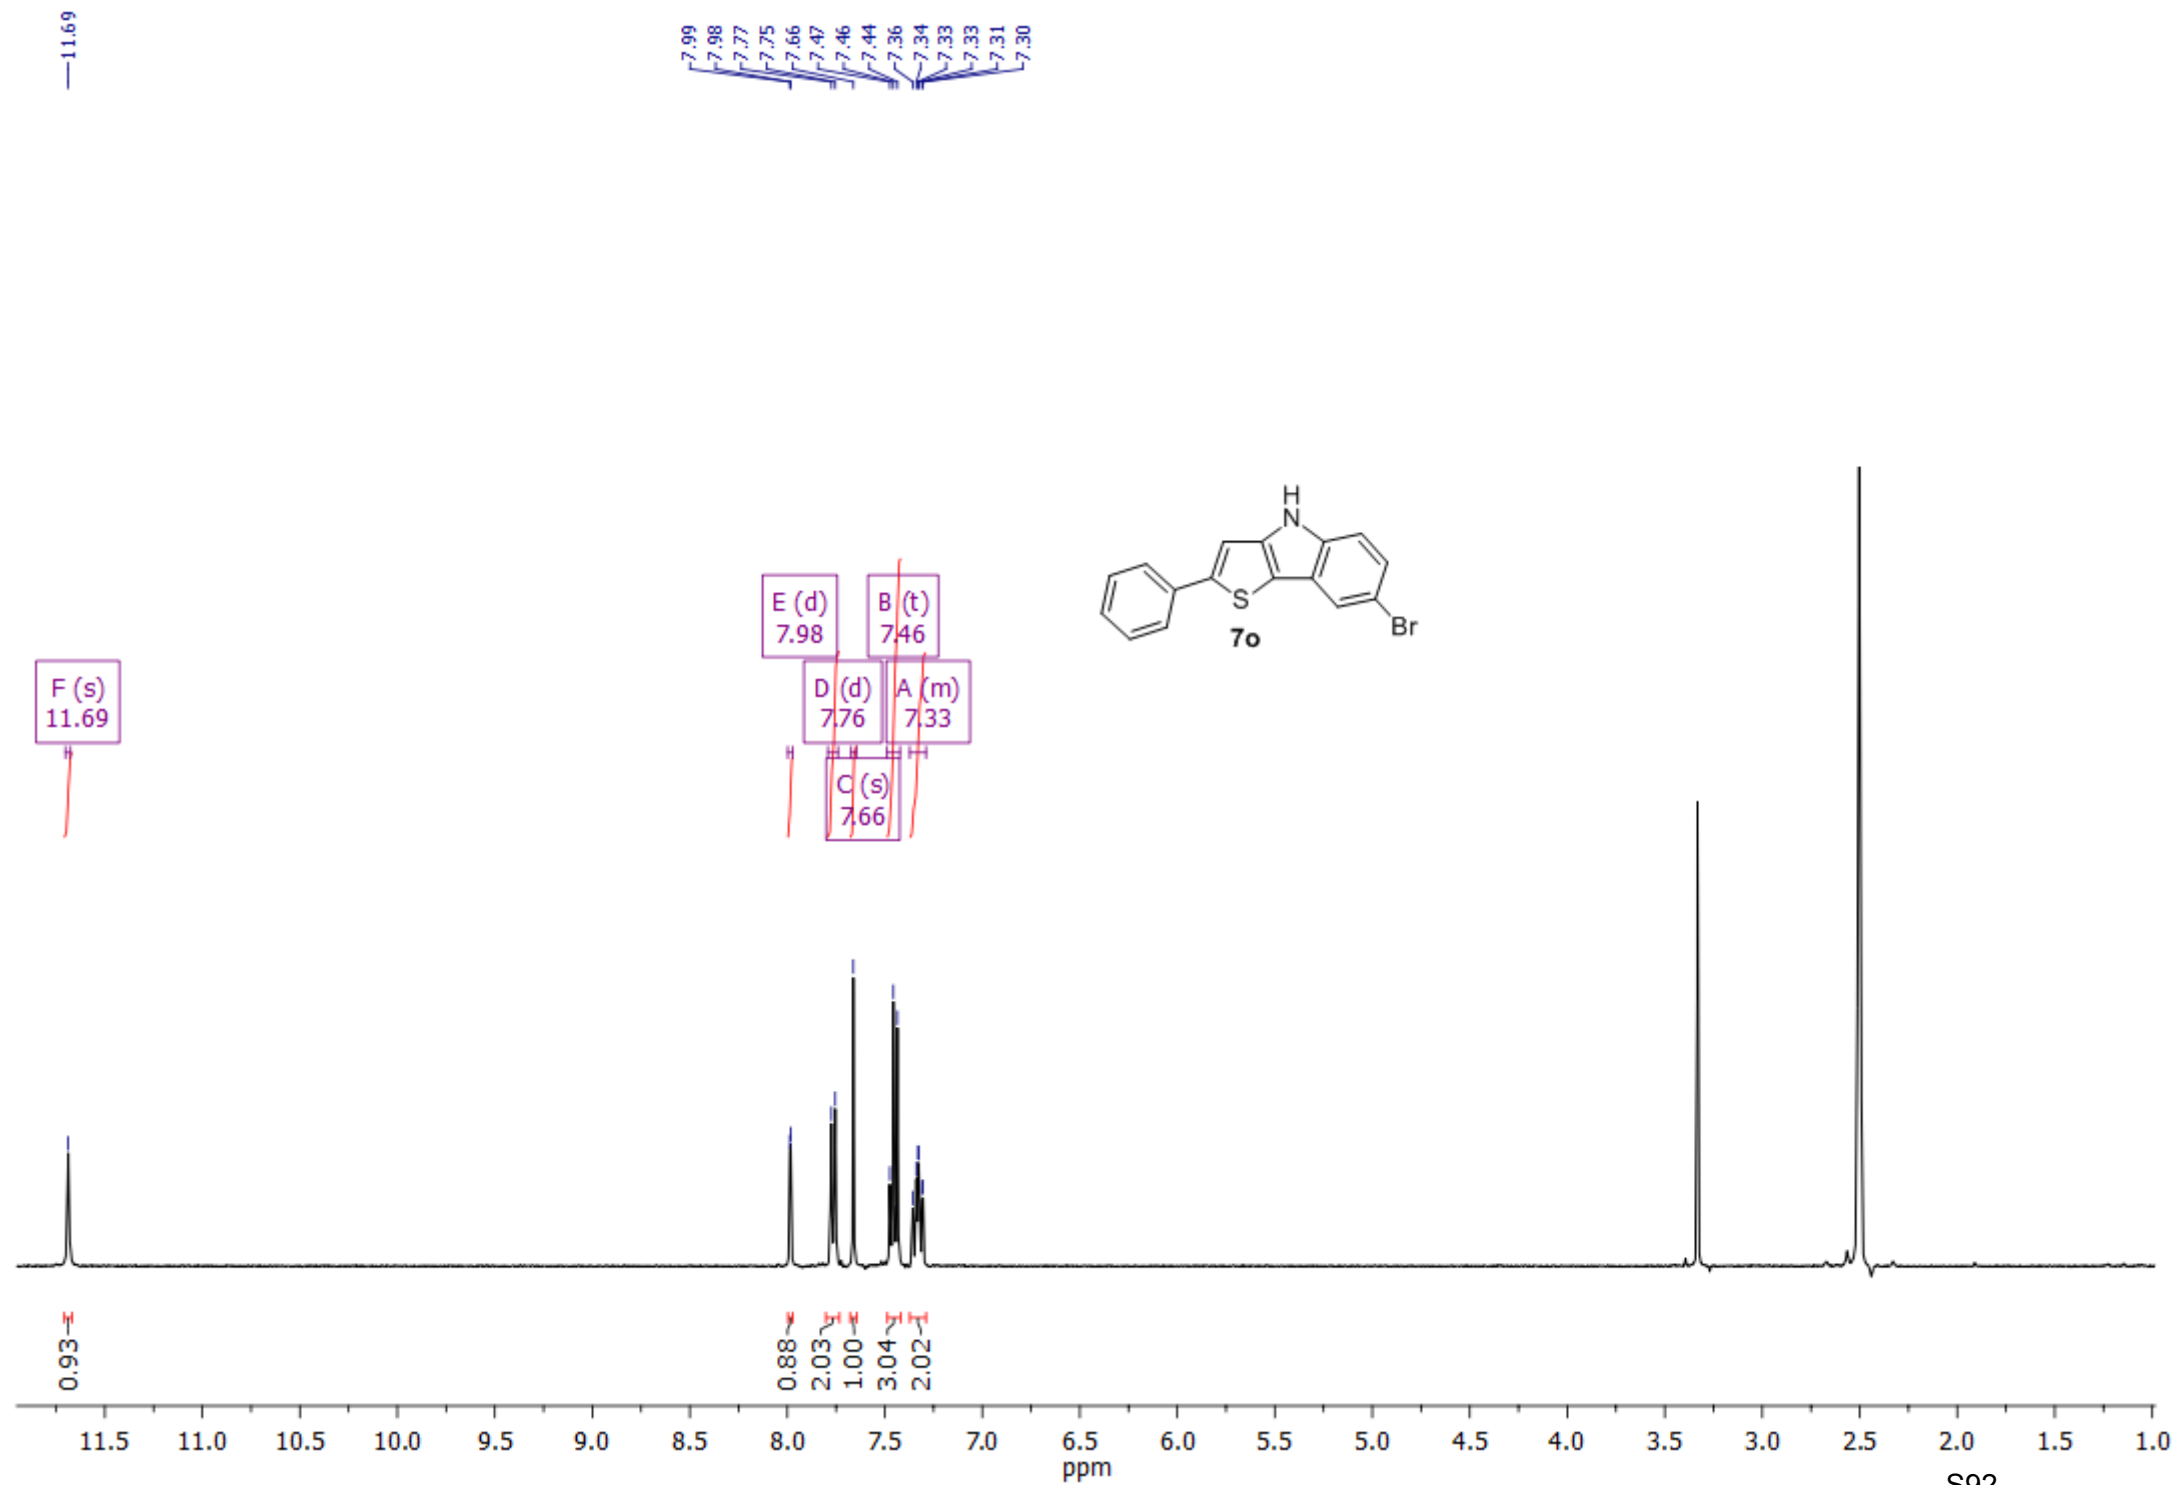

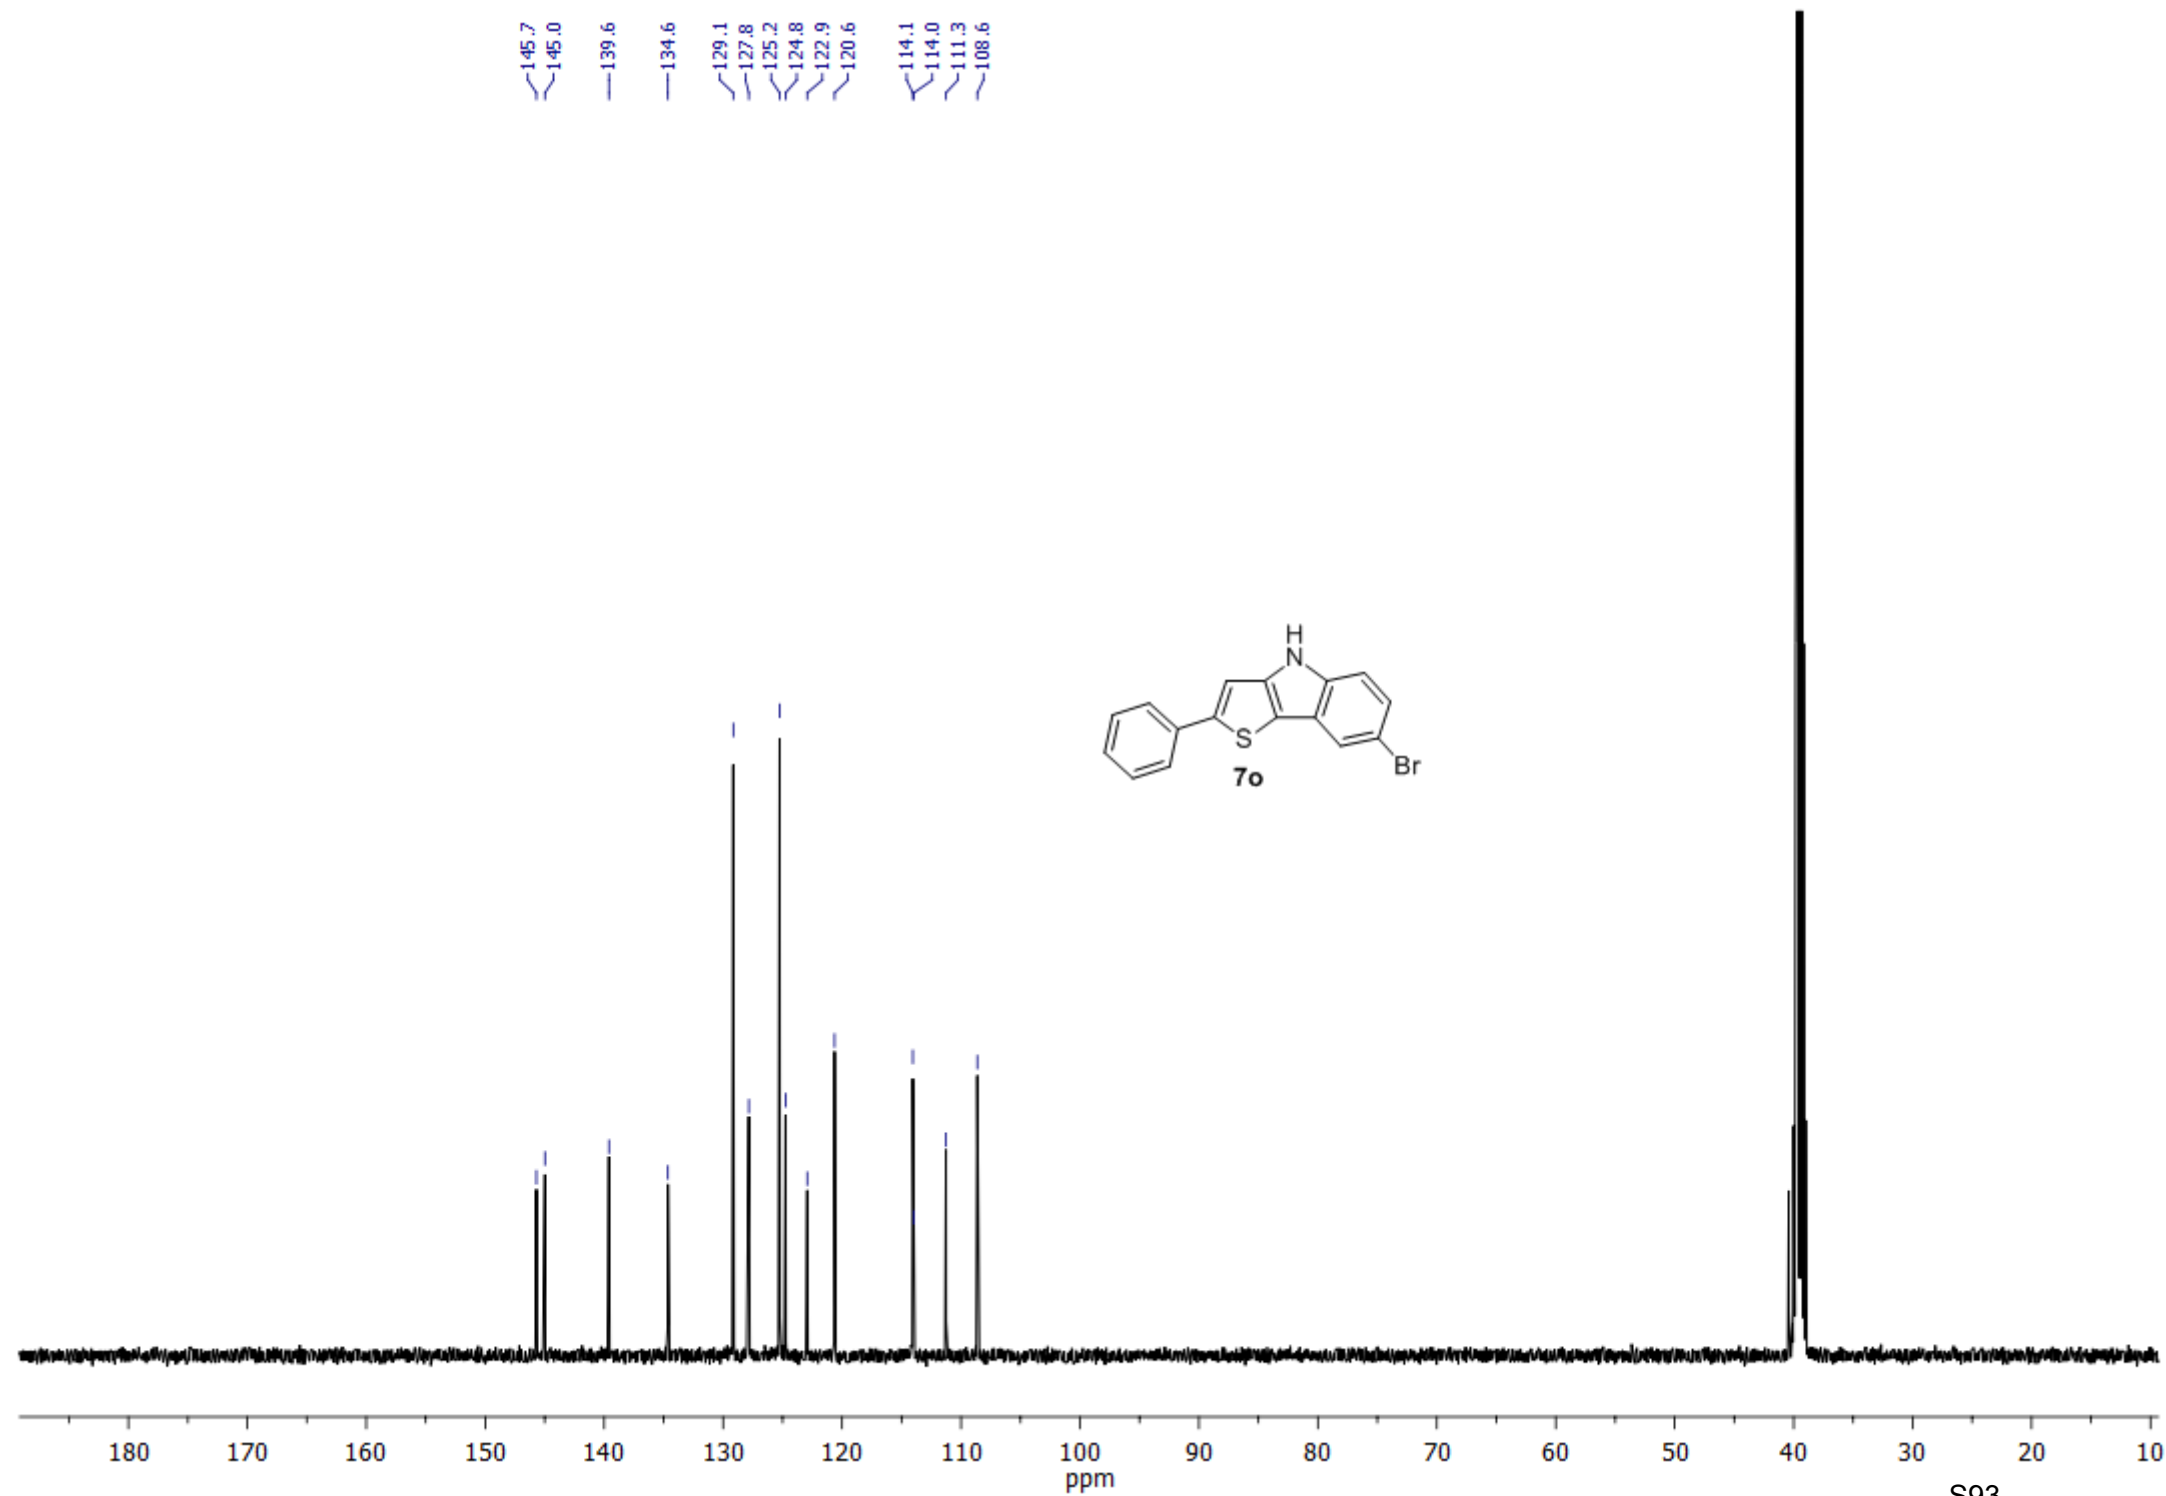

<sup>1</sup>H NMR (solvent: DMSO-*d*<sub>6</sub>)

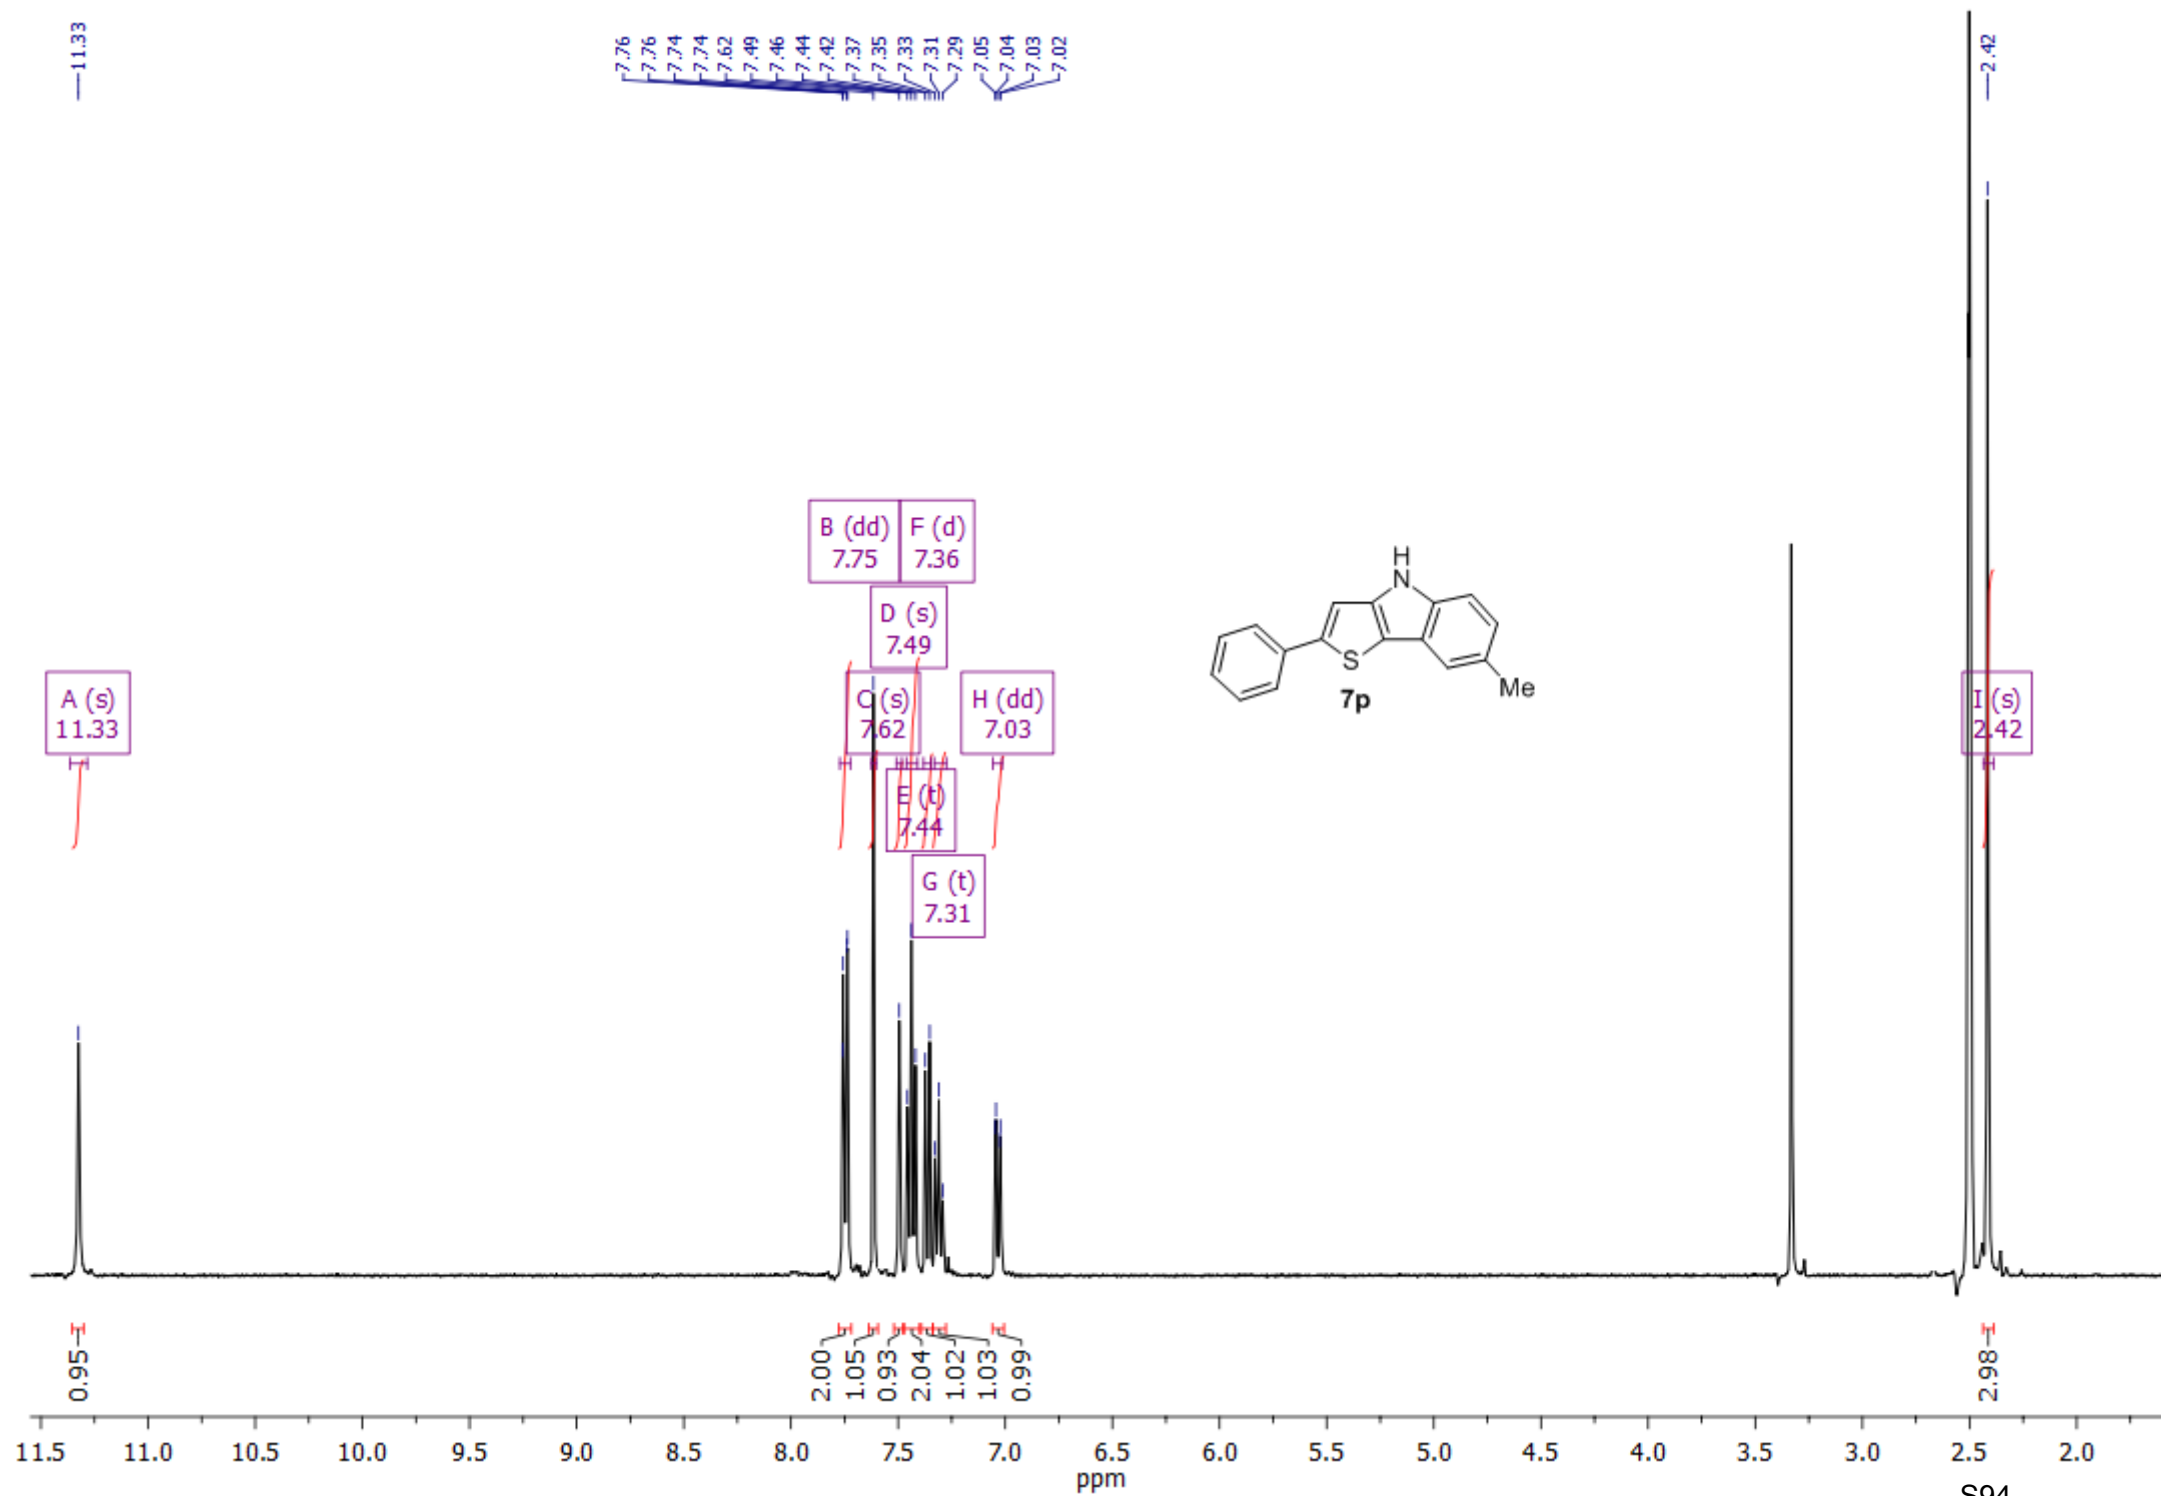

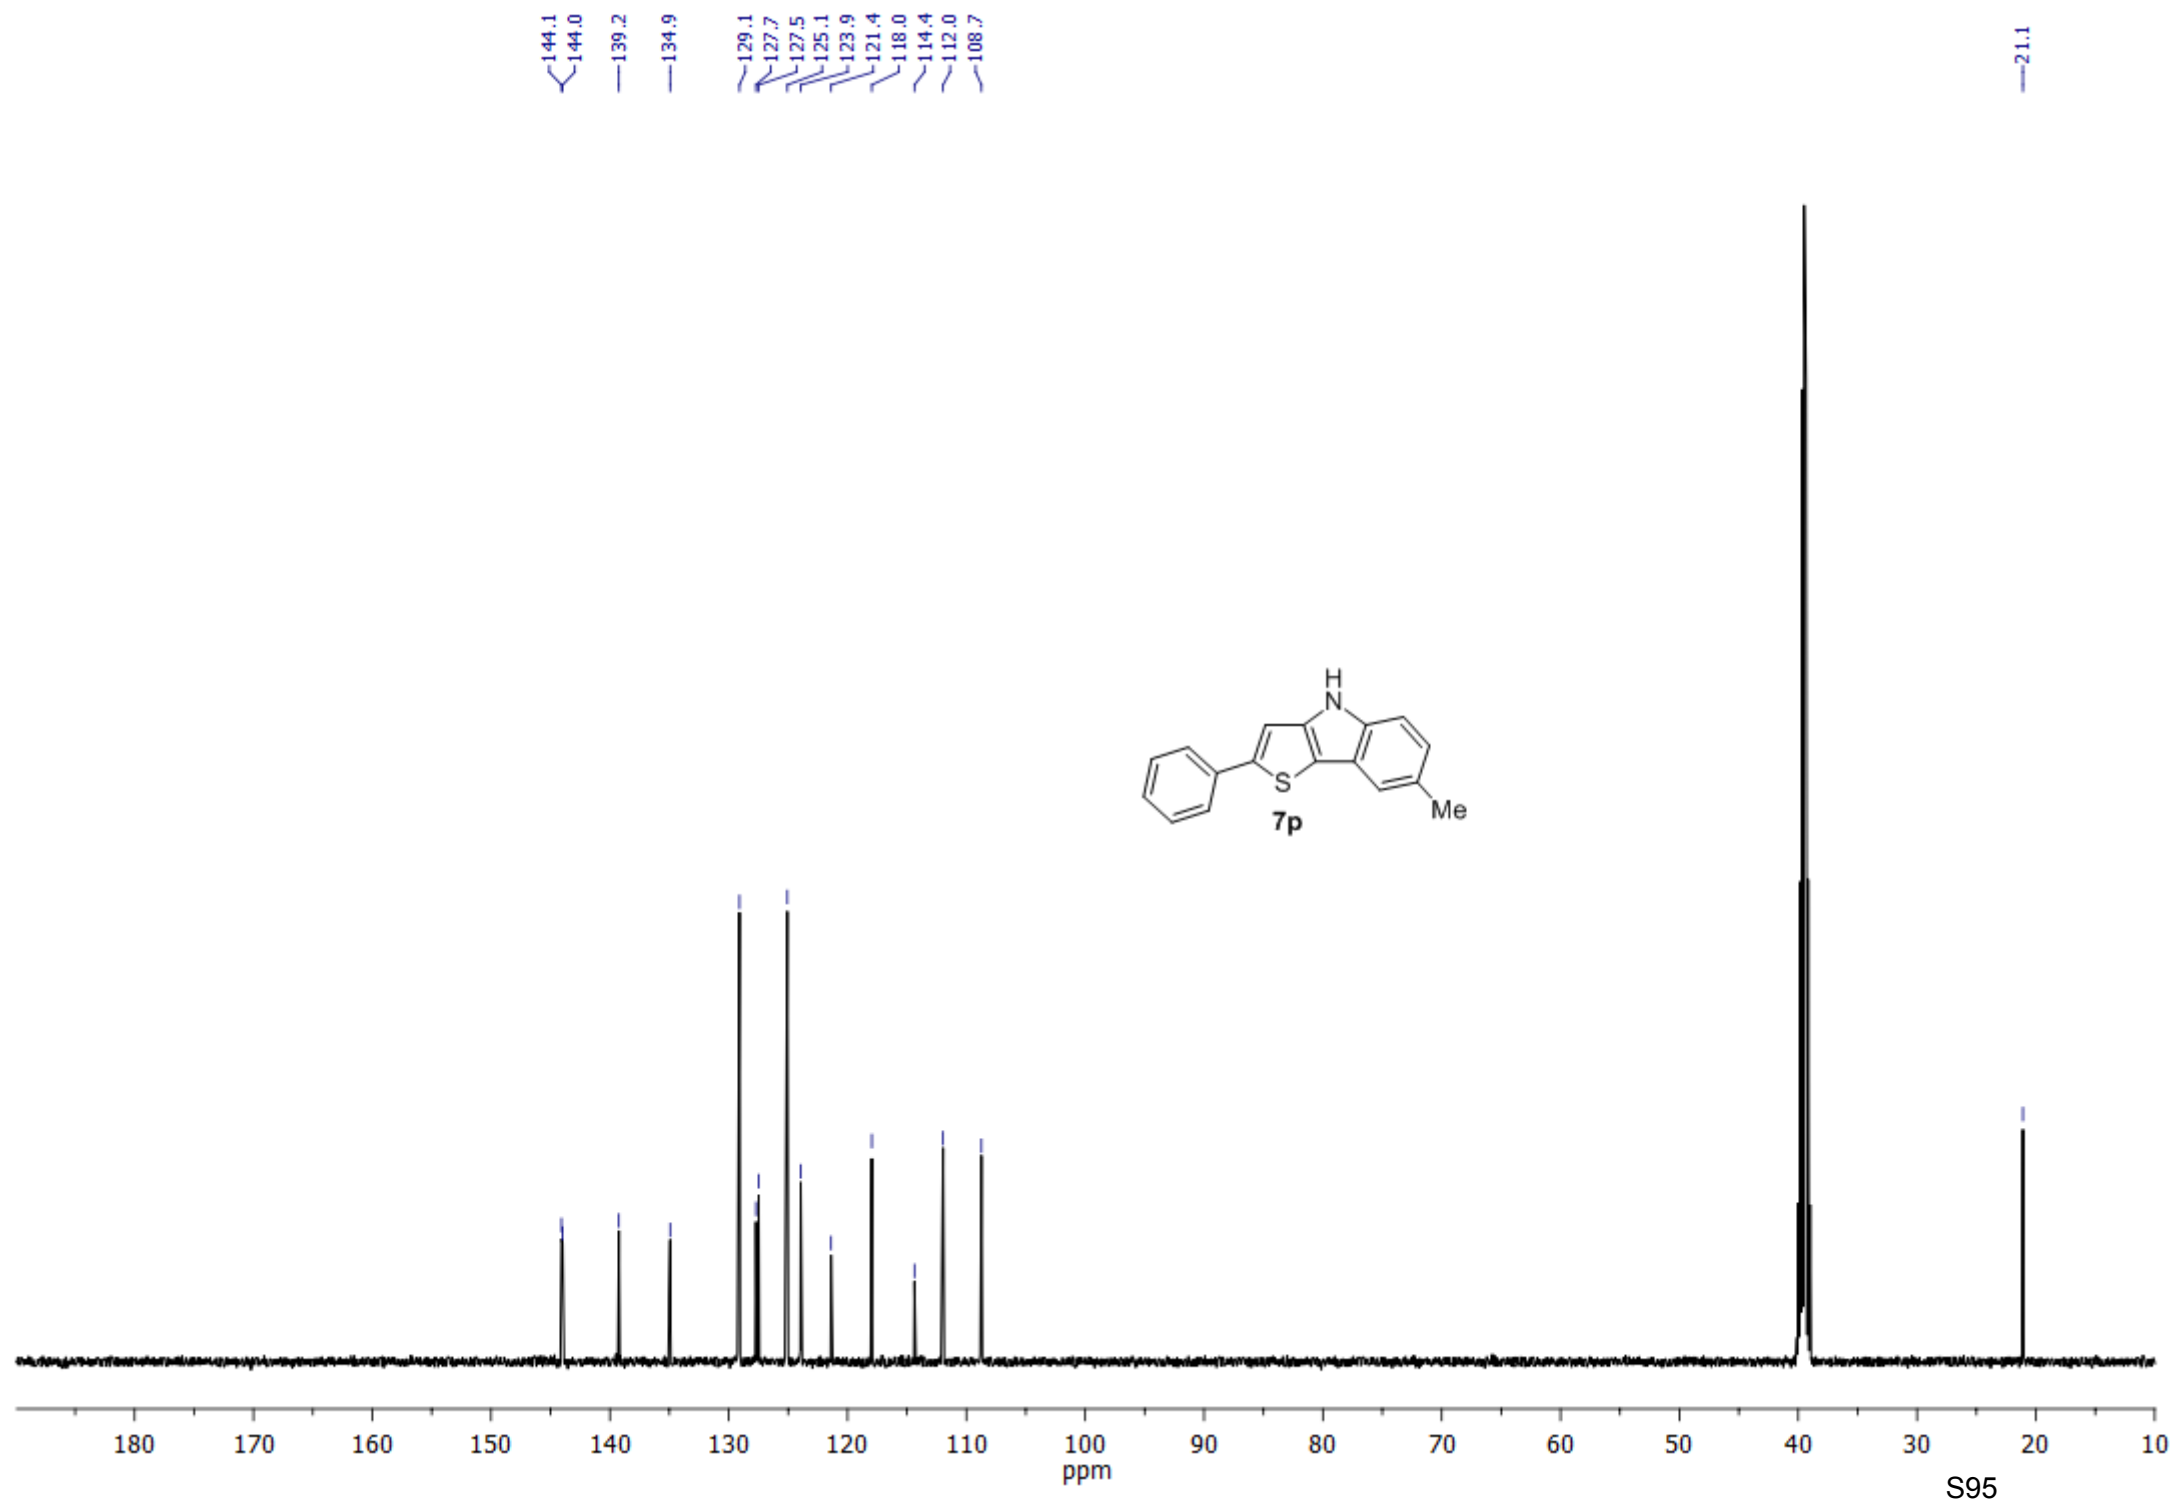

<sup>1</sup>H NMR (solvent: DMSO-*d*<sub>6</sub>)

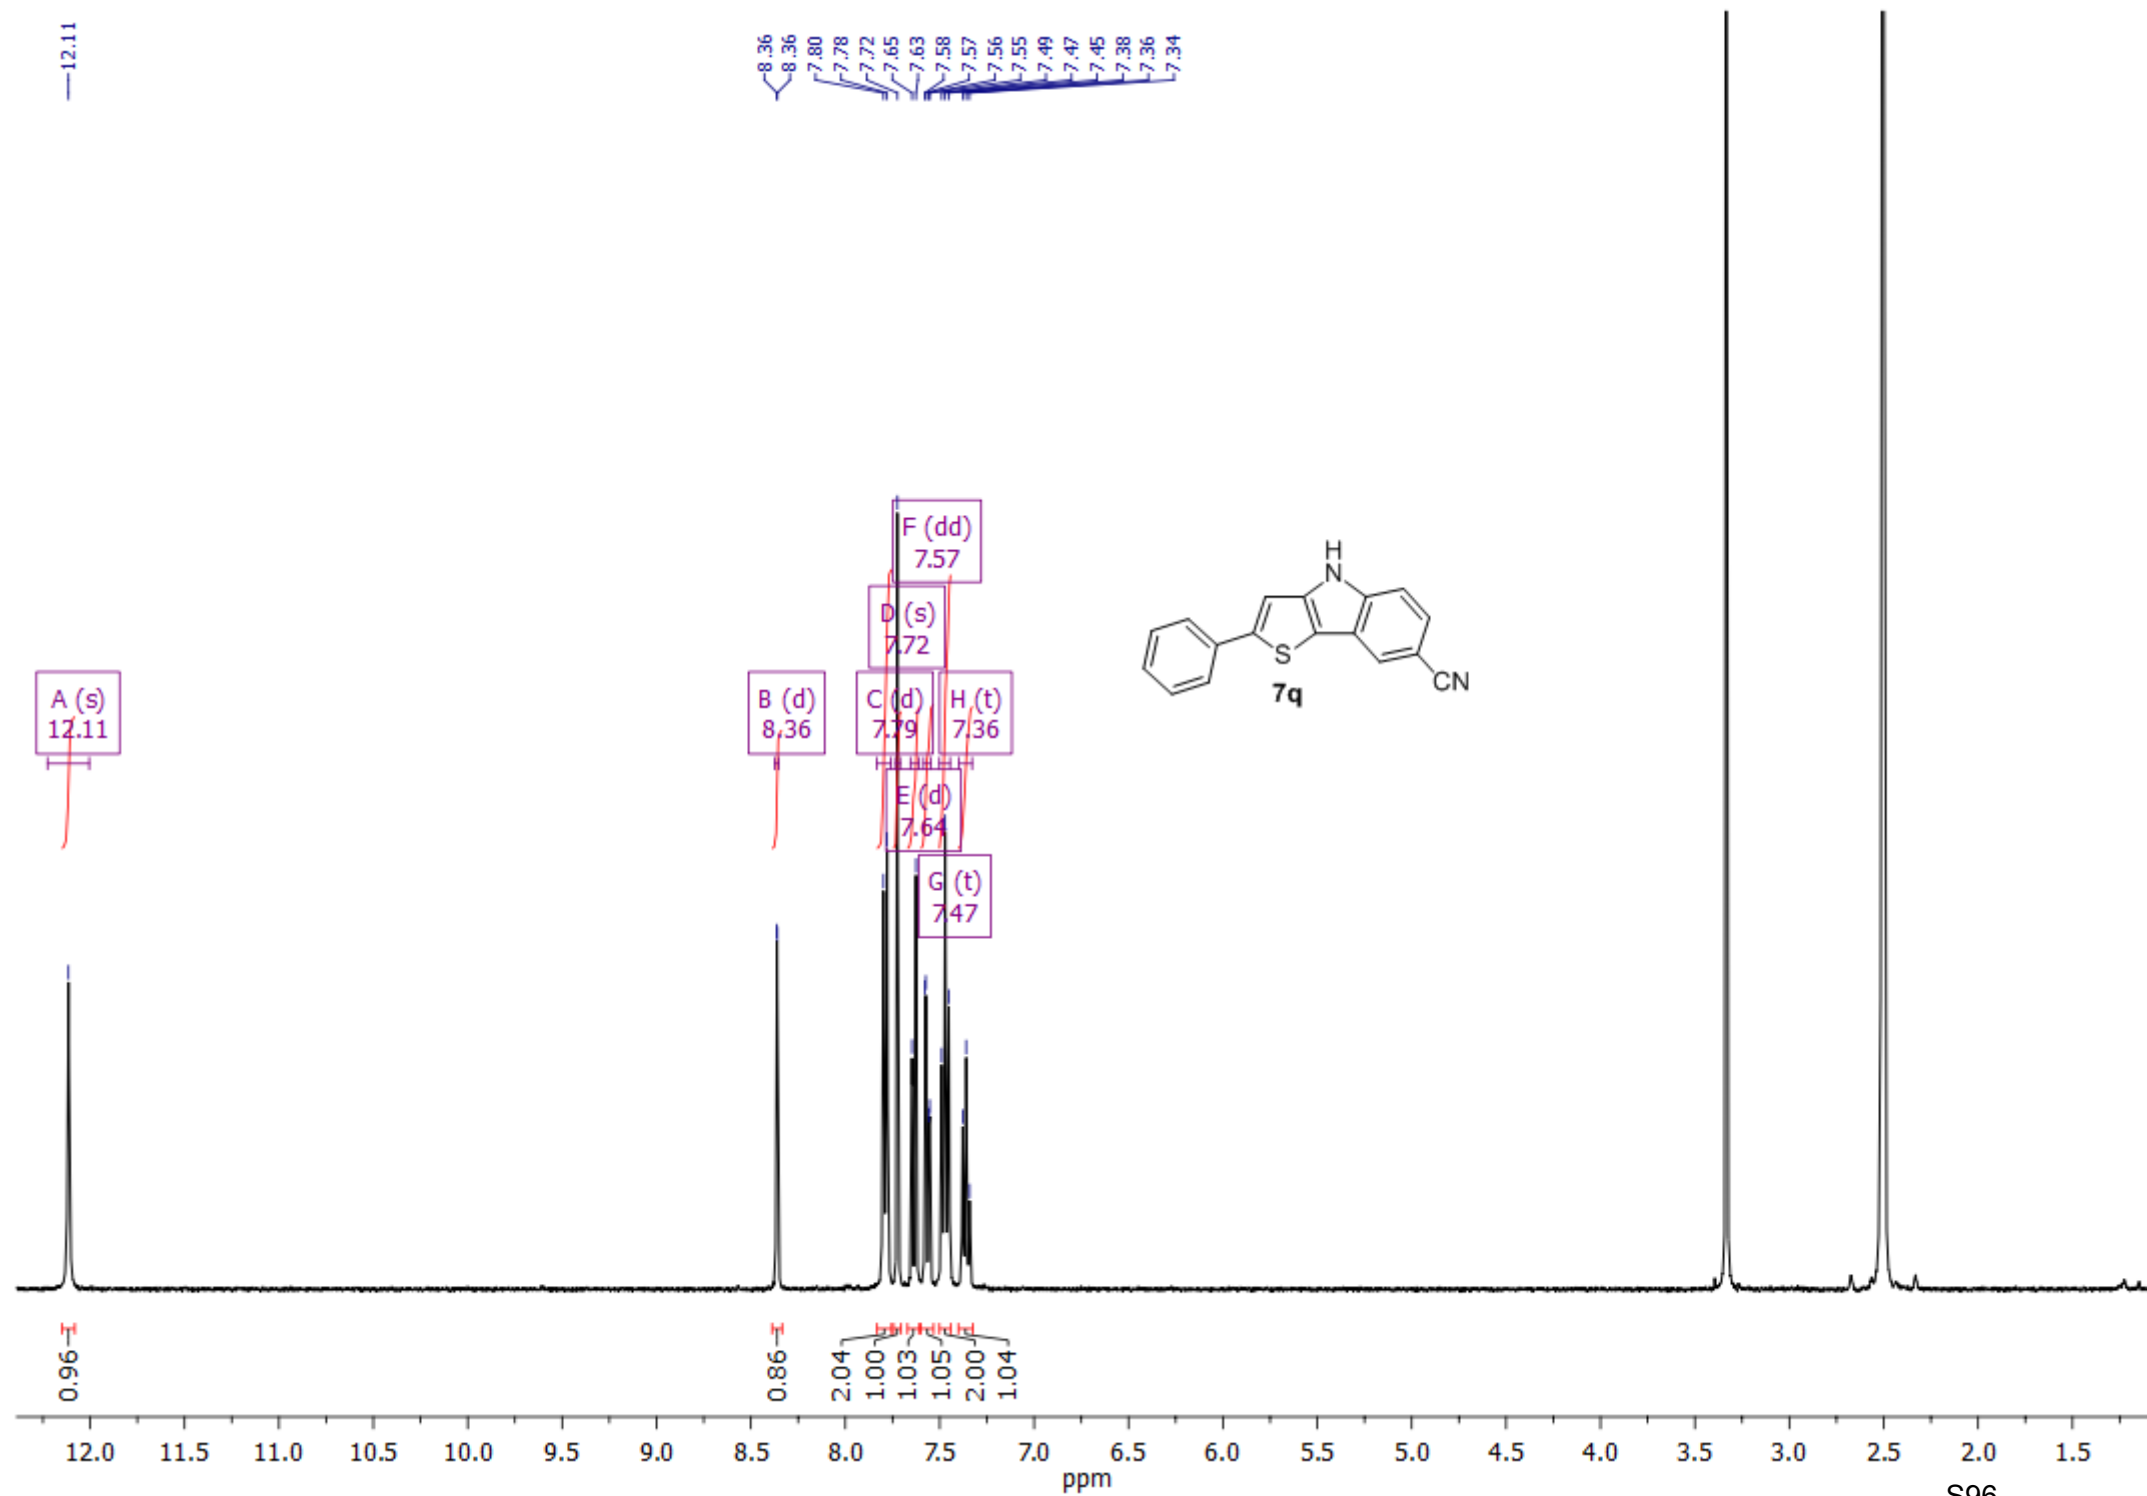



<sup>13</sup>C NMR (solvent: DMSO-*d*<sub>6</sub>)

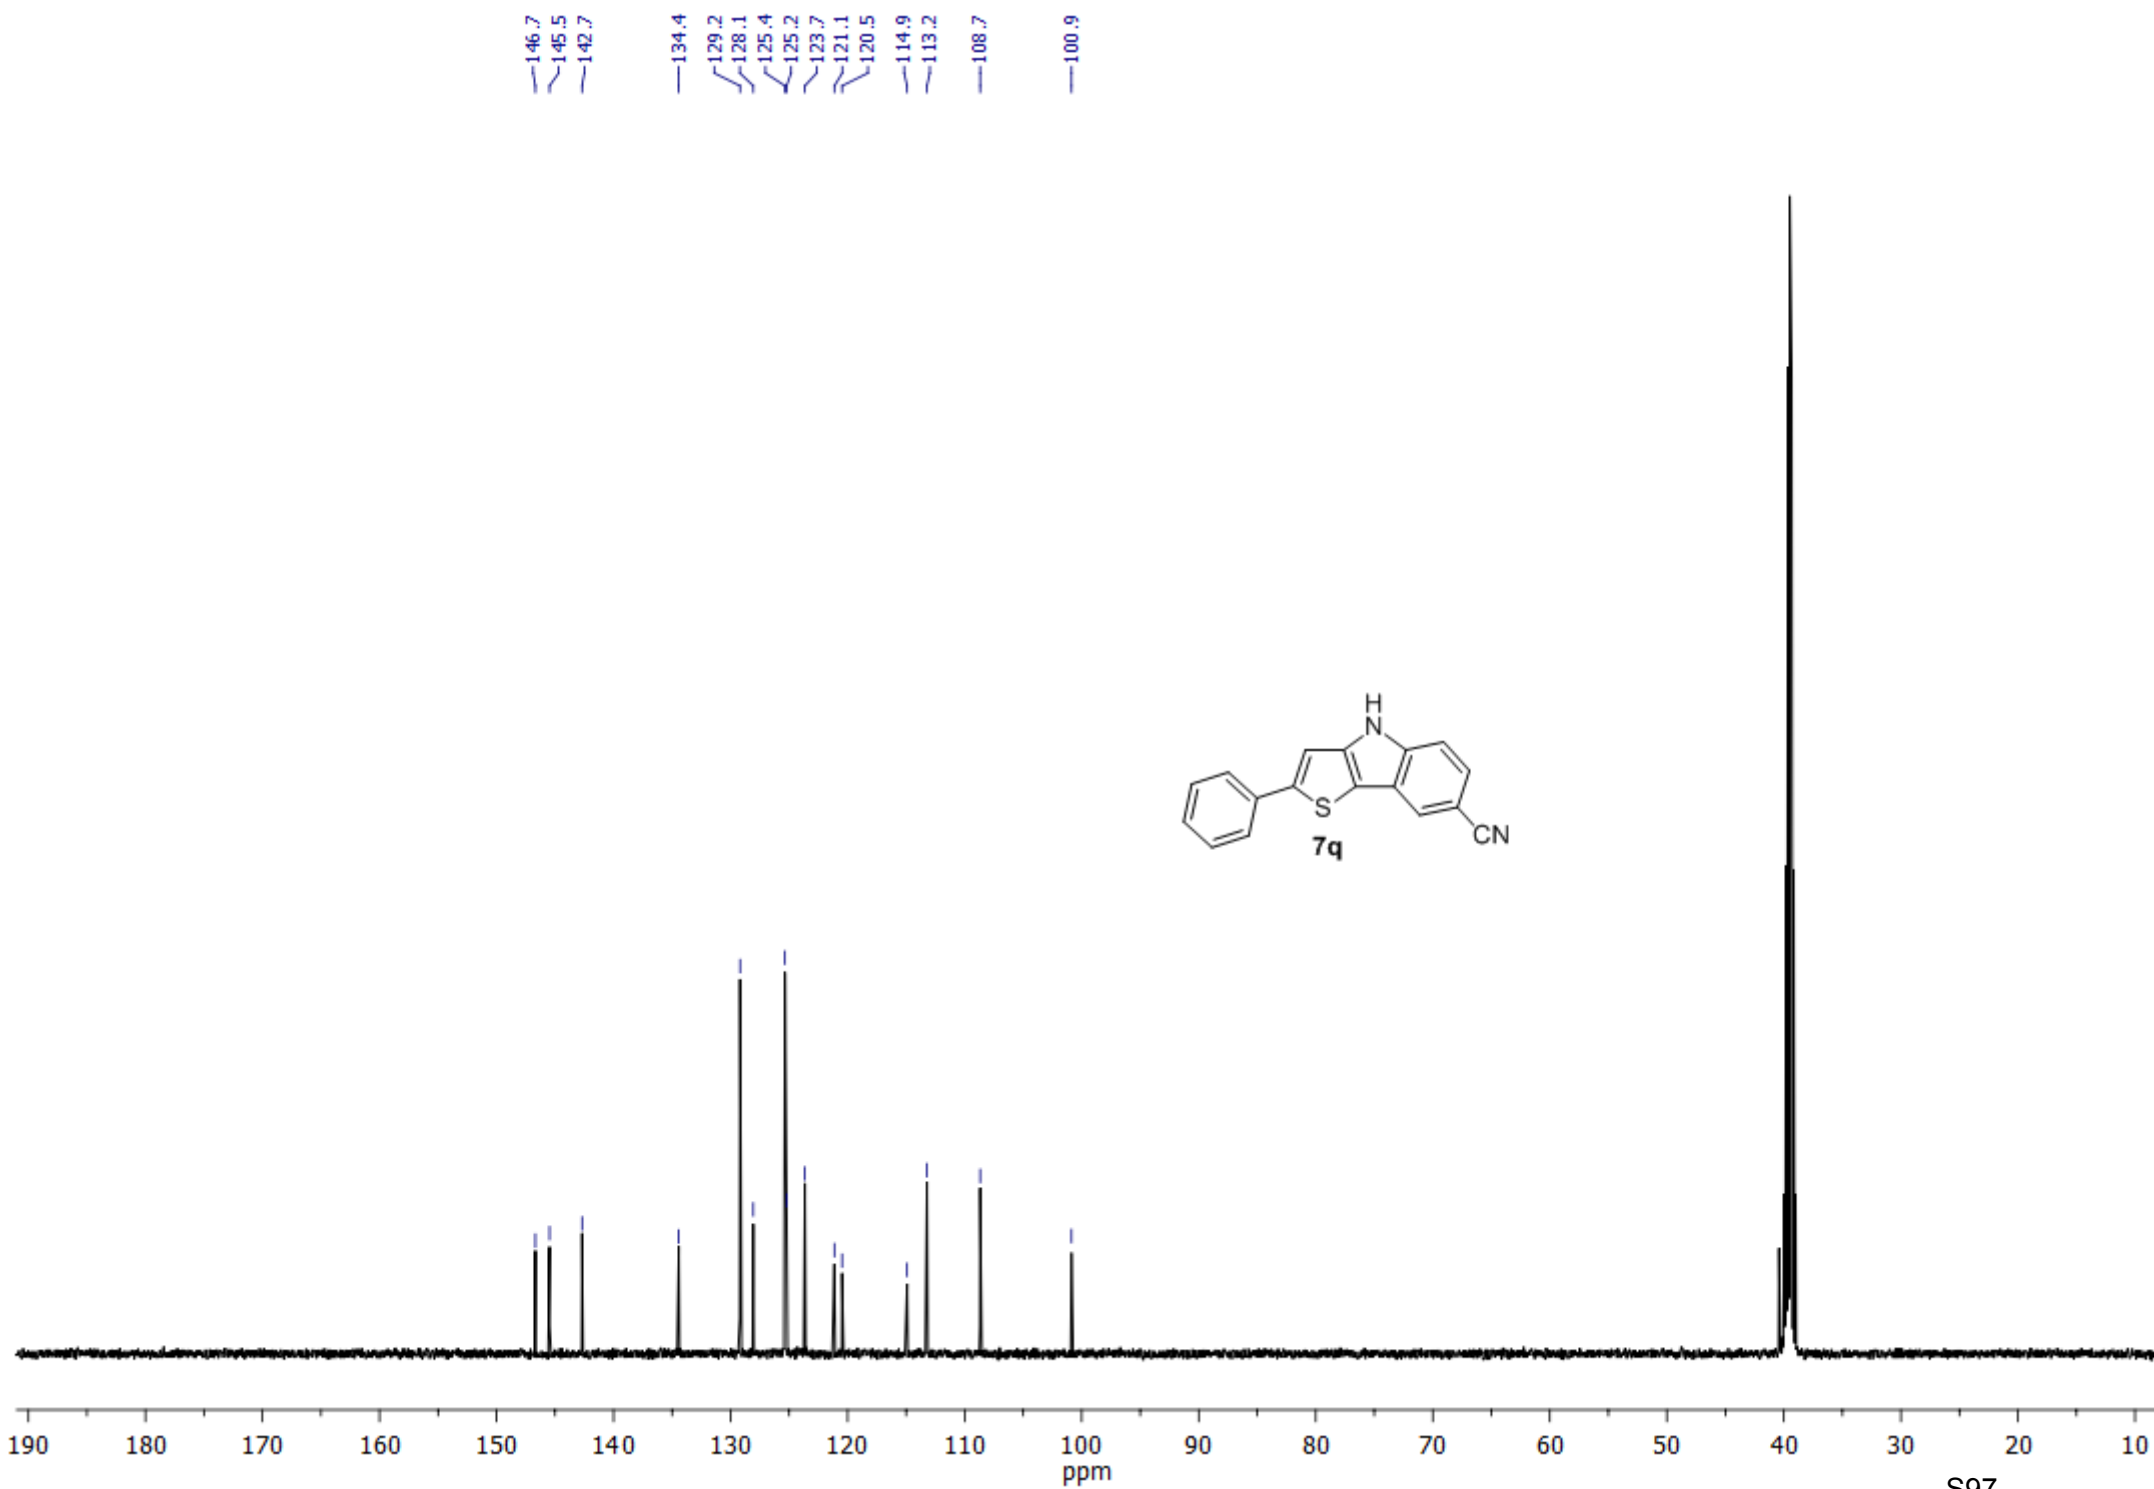

<sup>1</sup>H NMR (solvent: DMSO-*d*<sub>6</sub>)

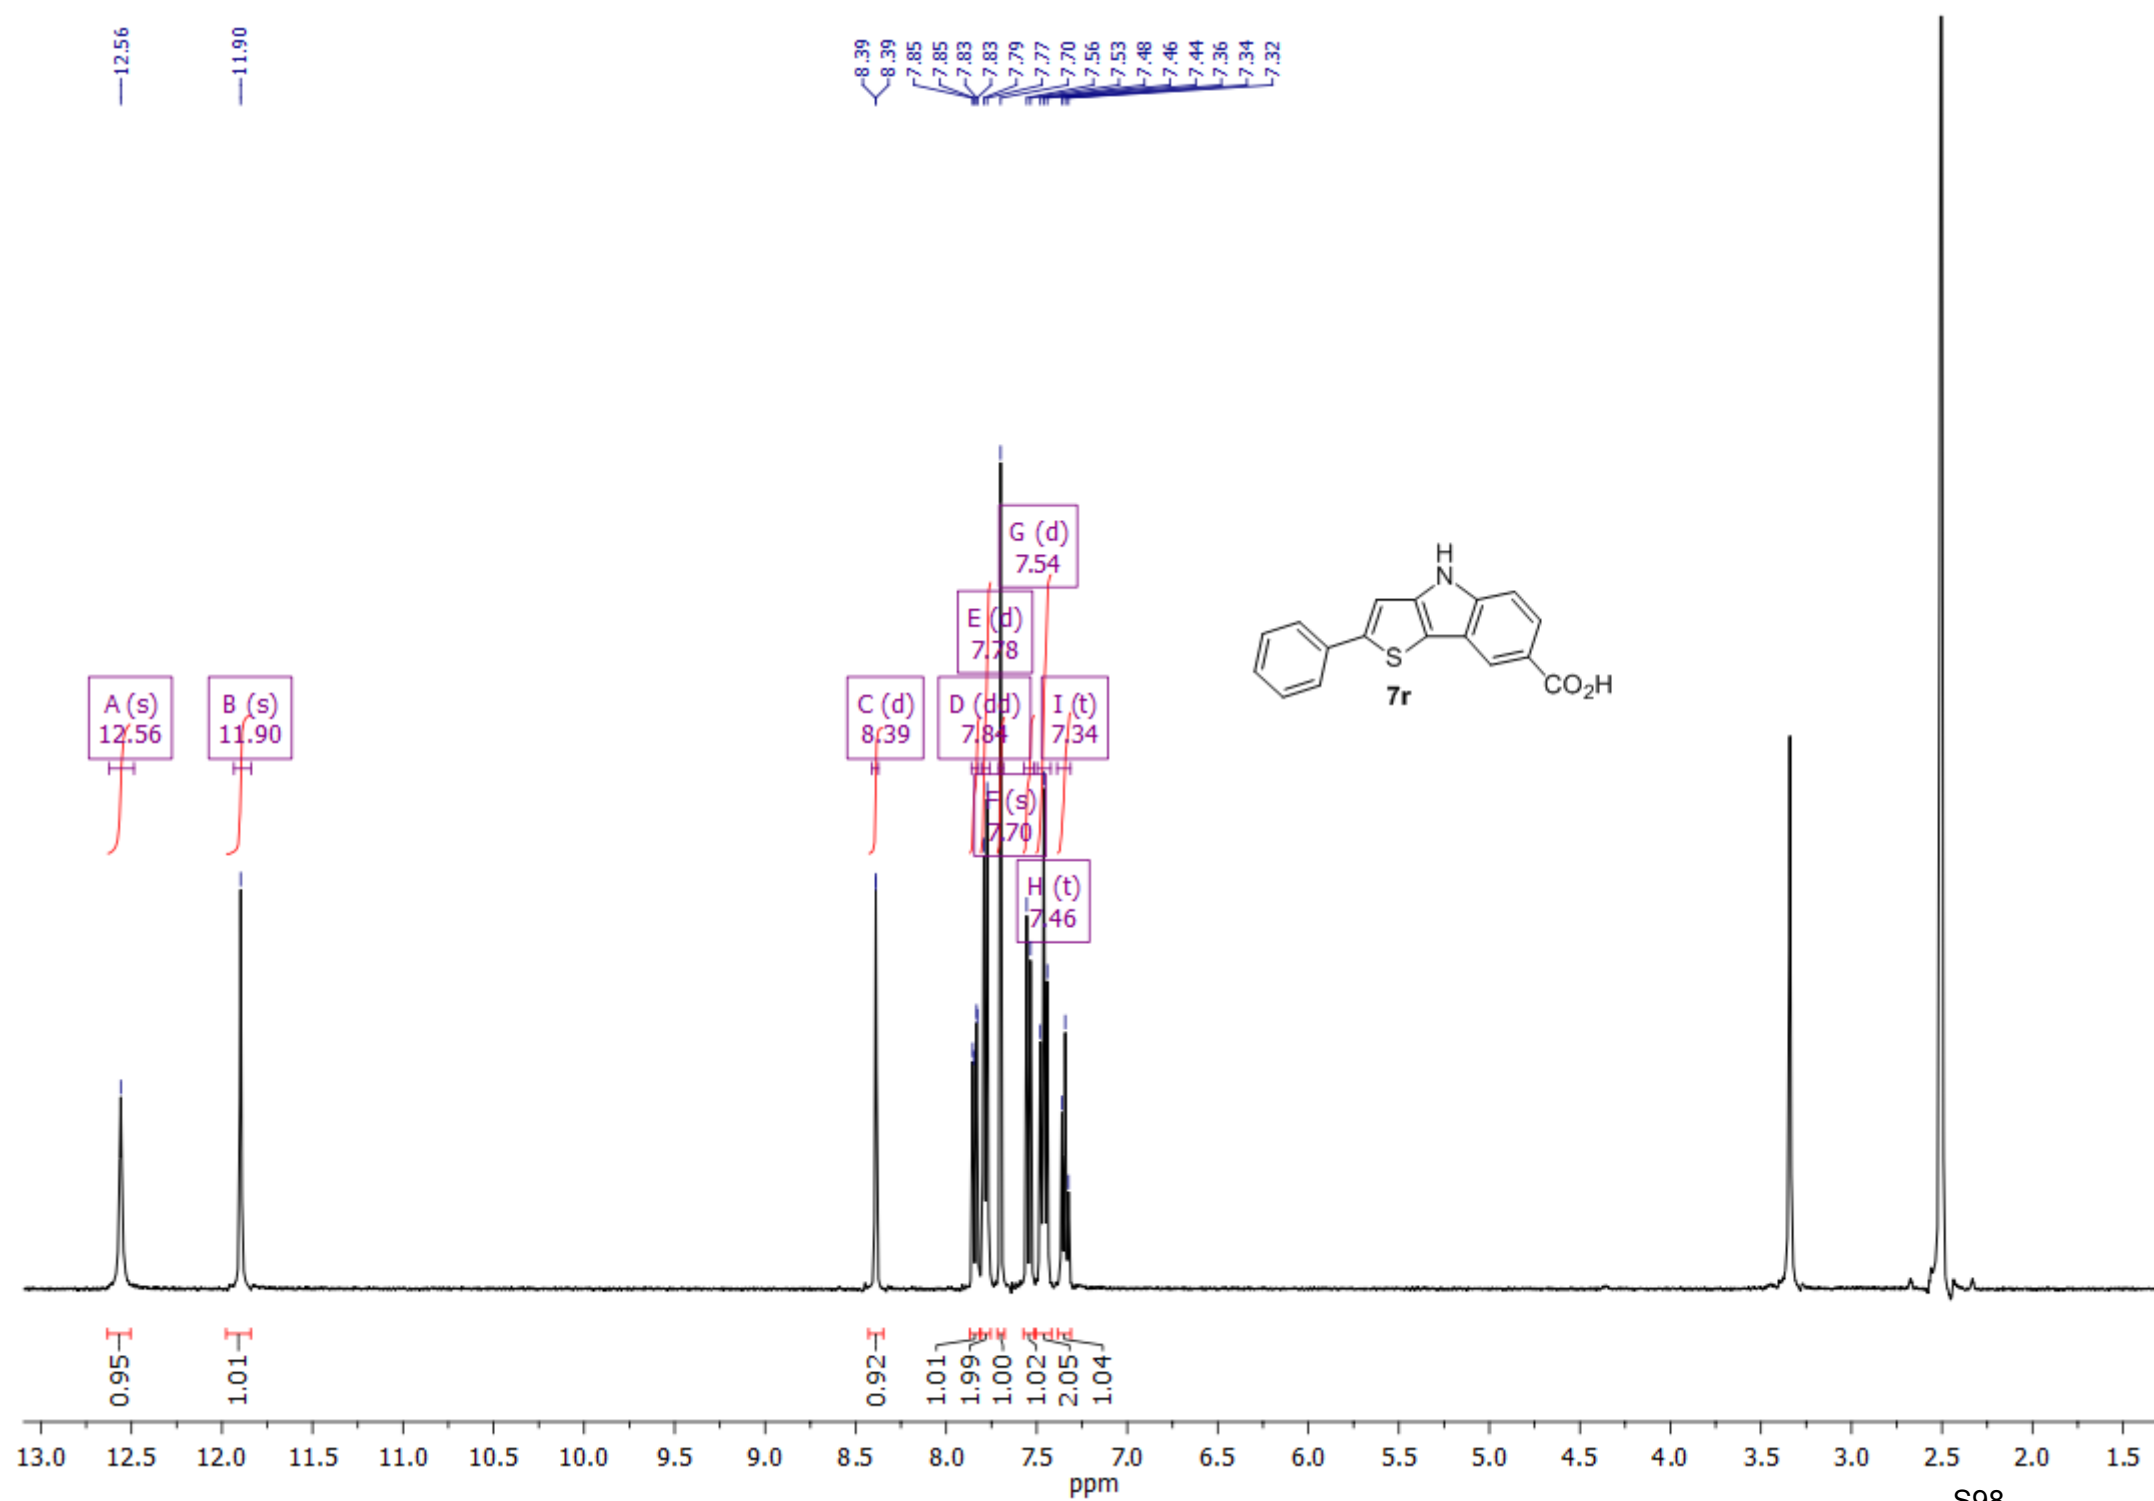

$^{13}\text{C}$  NMR (solvent:  $\text{DMSO-}d_6$ )

168.0  
145.5  
145.0  
143.4  
134.6  
129.2  
127.8  
125.3  
123.7  
121.5  
120.8  
120.6  
115.5  
111.9  
108.8

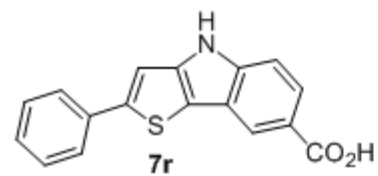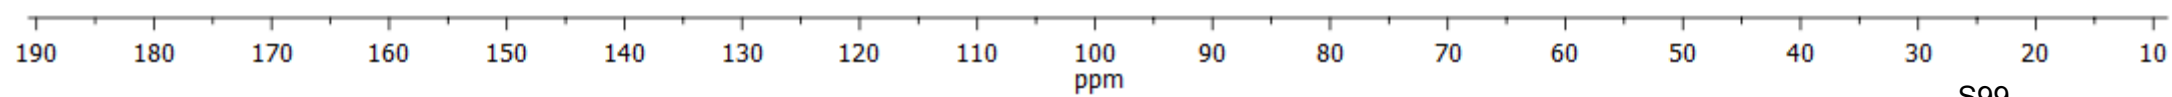

<sup>1</sup>H NMR (solvent: DMSO-*d*<sub>6</sub>)

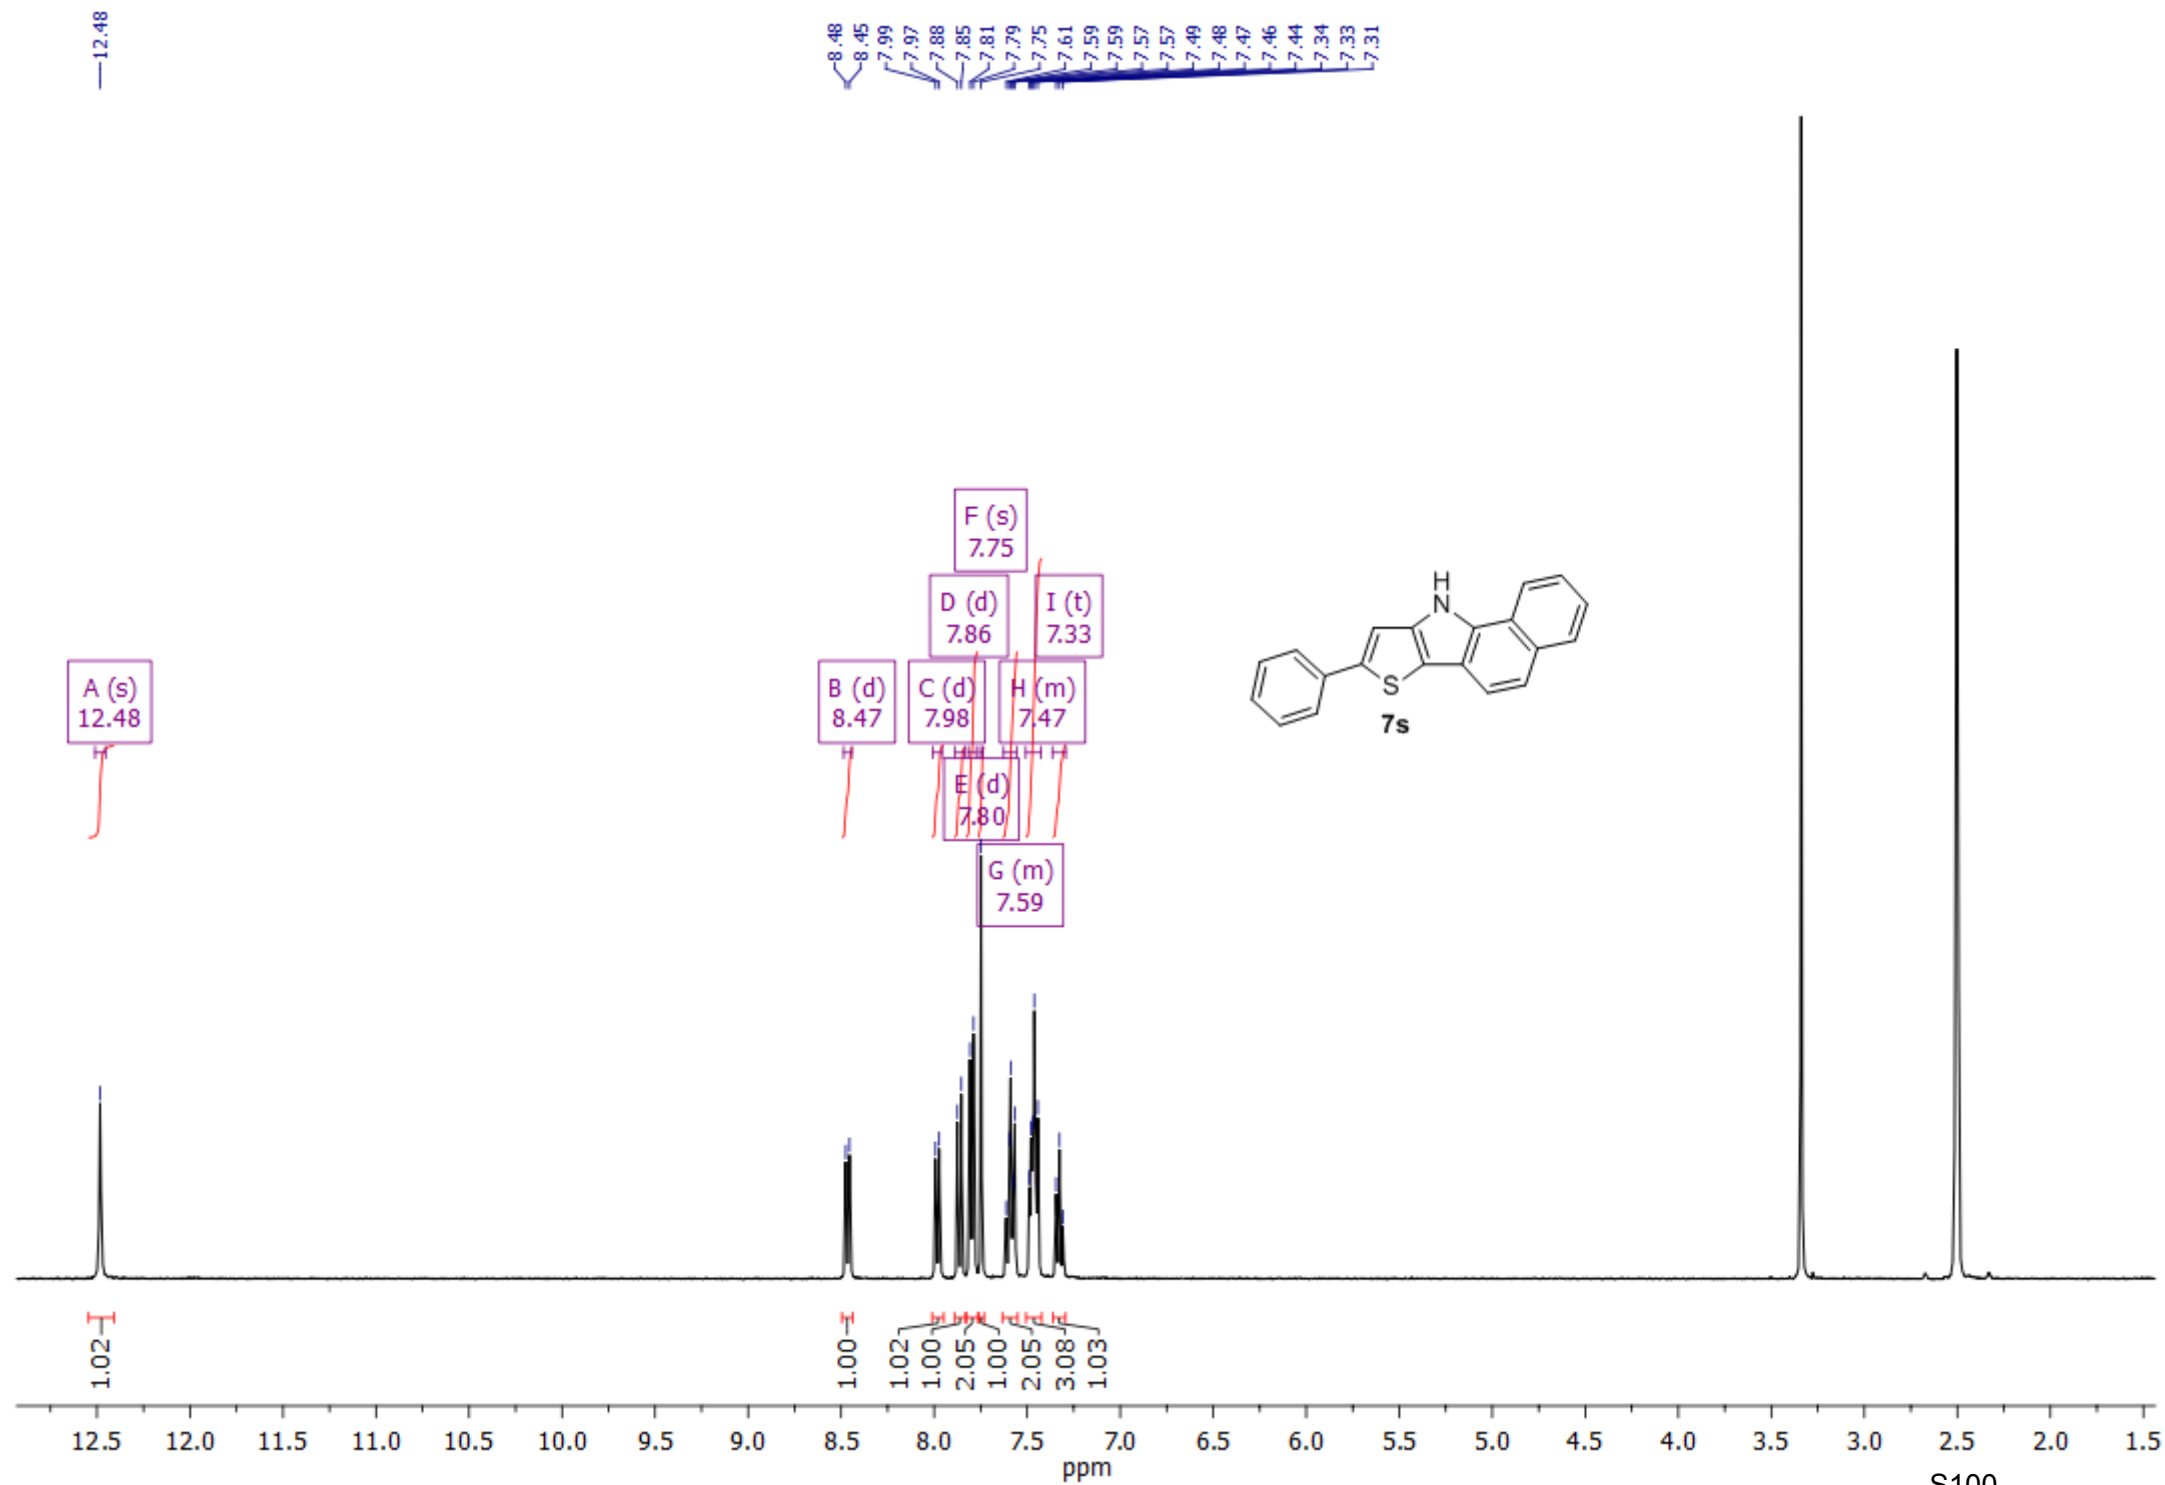

<sup>13</sup>C NMR (solvent: DMSO-*d*<sub>6</sub>)

143.4  
142.6  
135.5  
135.0  
130.1  
129.1  
128.5  
127.4  
125.6  
125.1  
124.2  
121.1  
119.9  
108.9

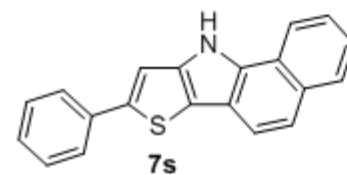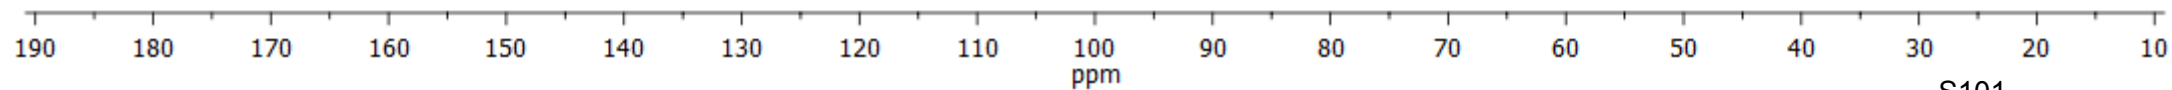

<sup>1</sup>H NMR (solvent: DMSO-*d*<sub>6</sub>)

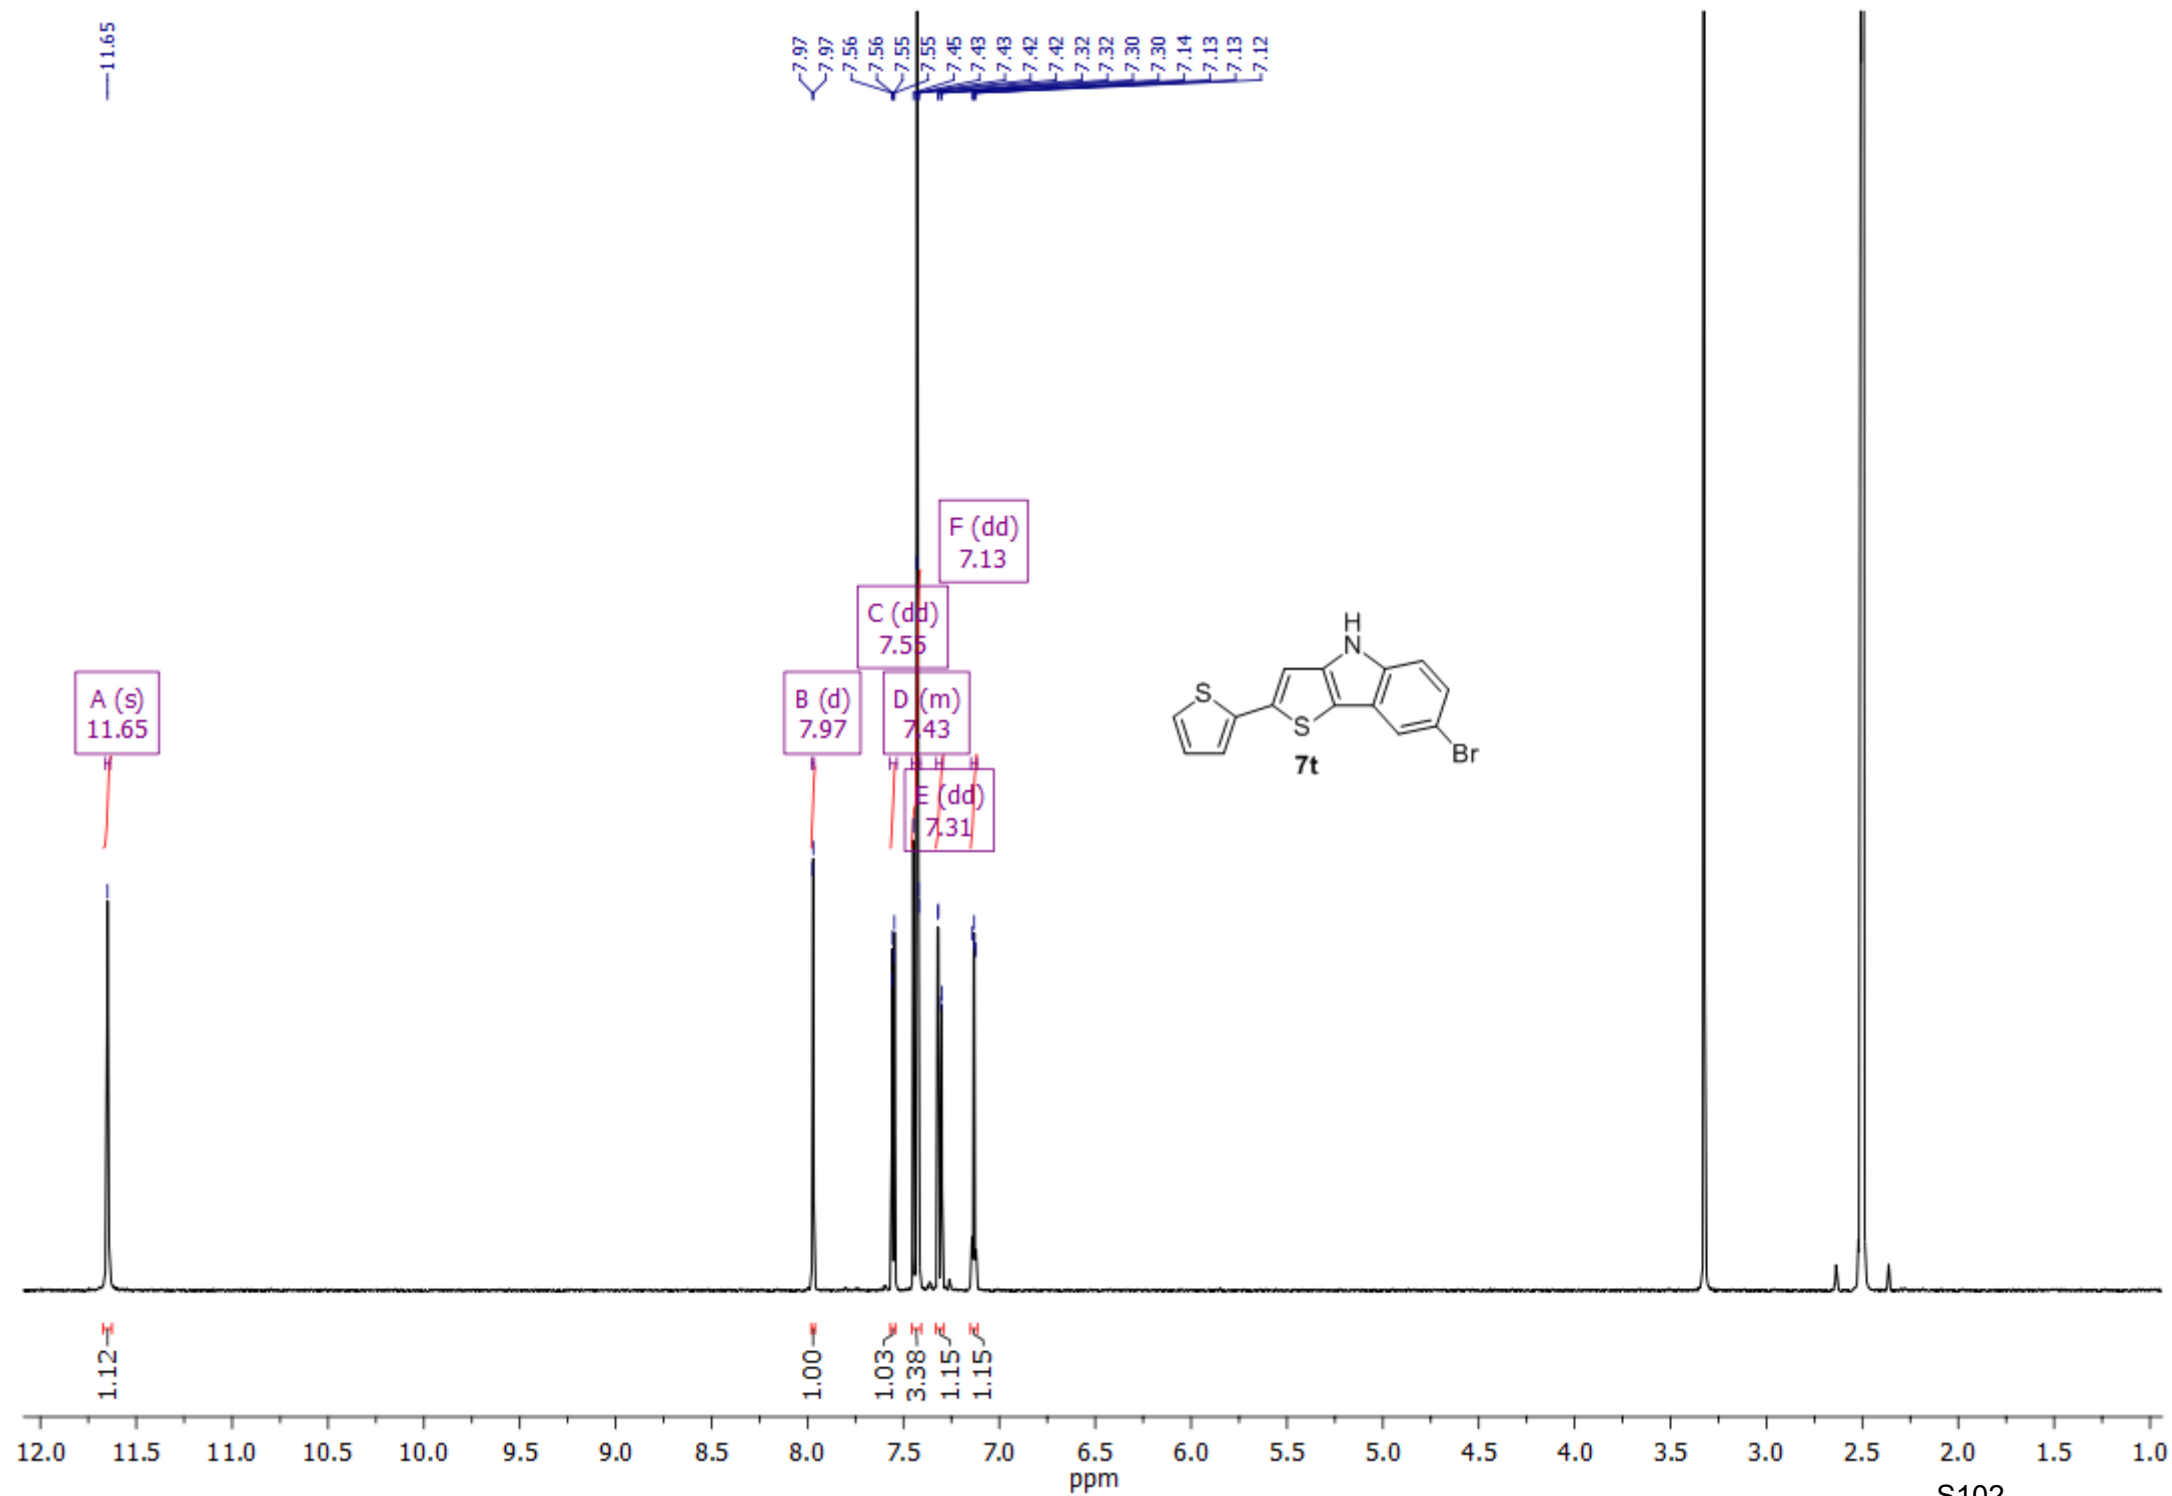

$^{13}\text{C}$  NMR (solvent:  $\text{DMSO-}d_6$ )

144.5  
139.6  
138.7  
137.6  
128.4  
125.6  
124.8  
124.1  
122.8  
120.6  
114.1  
113.5  
111.4  
108.6

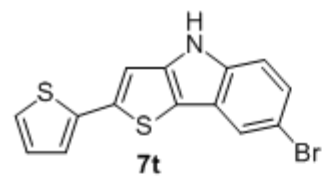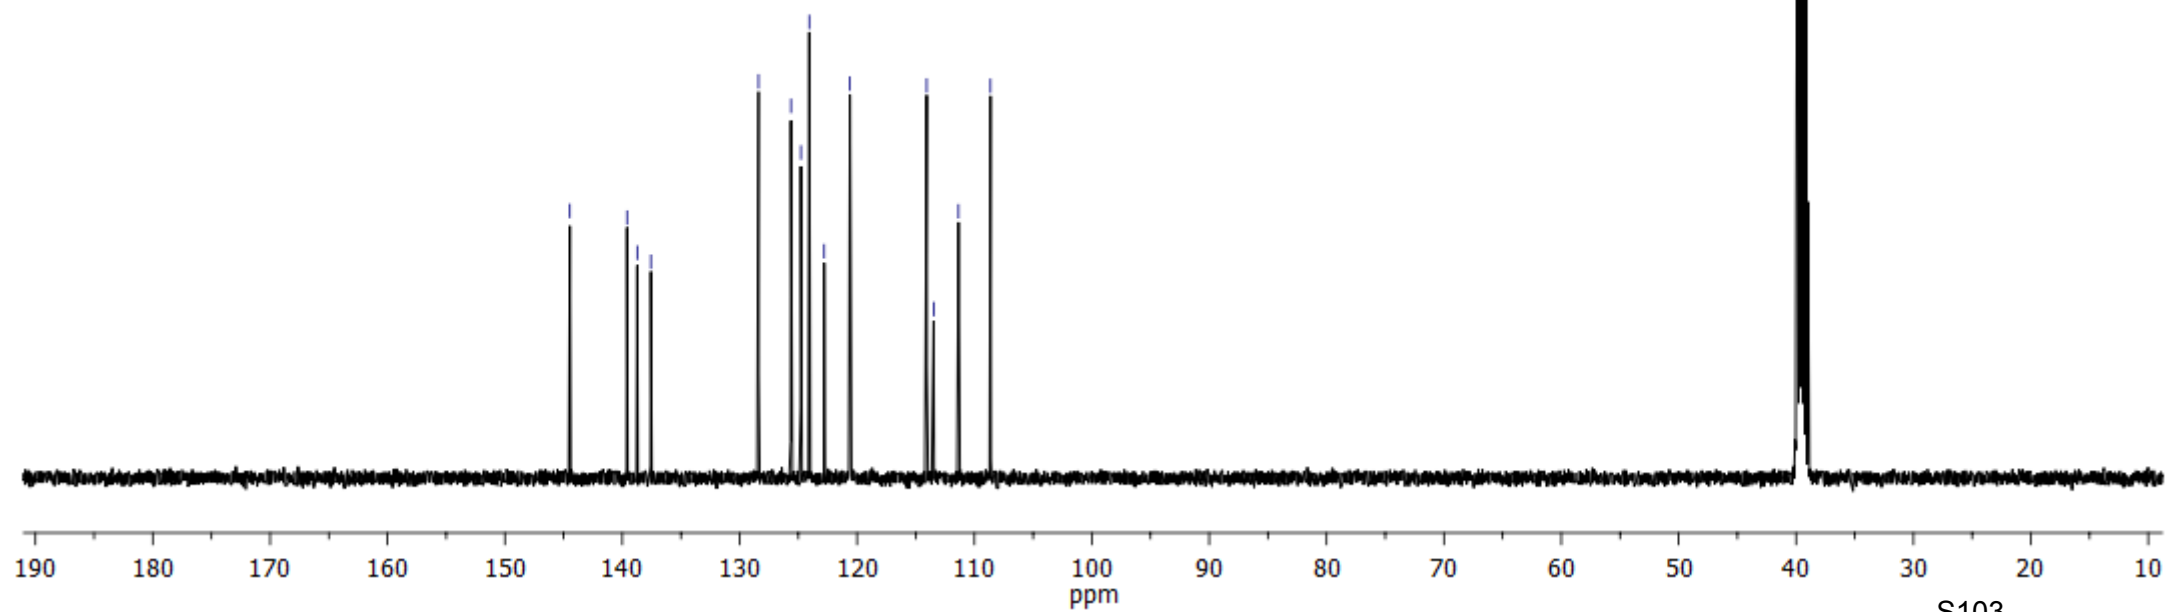

<sup>1</sup>H NMR (solvent: DMSO-*d*<sub>6</sub>)

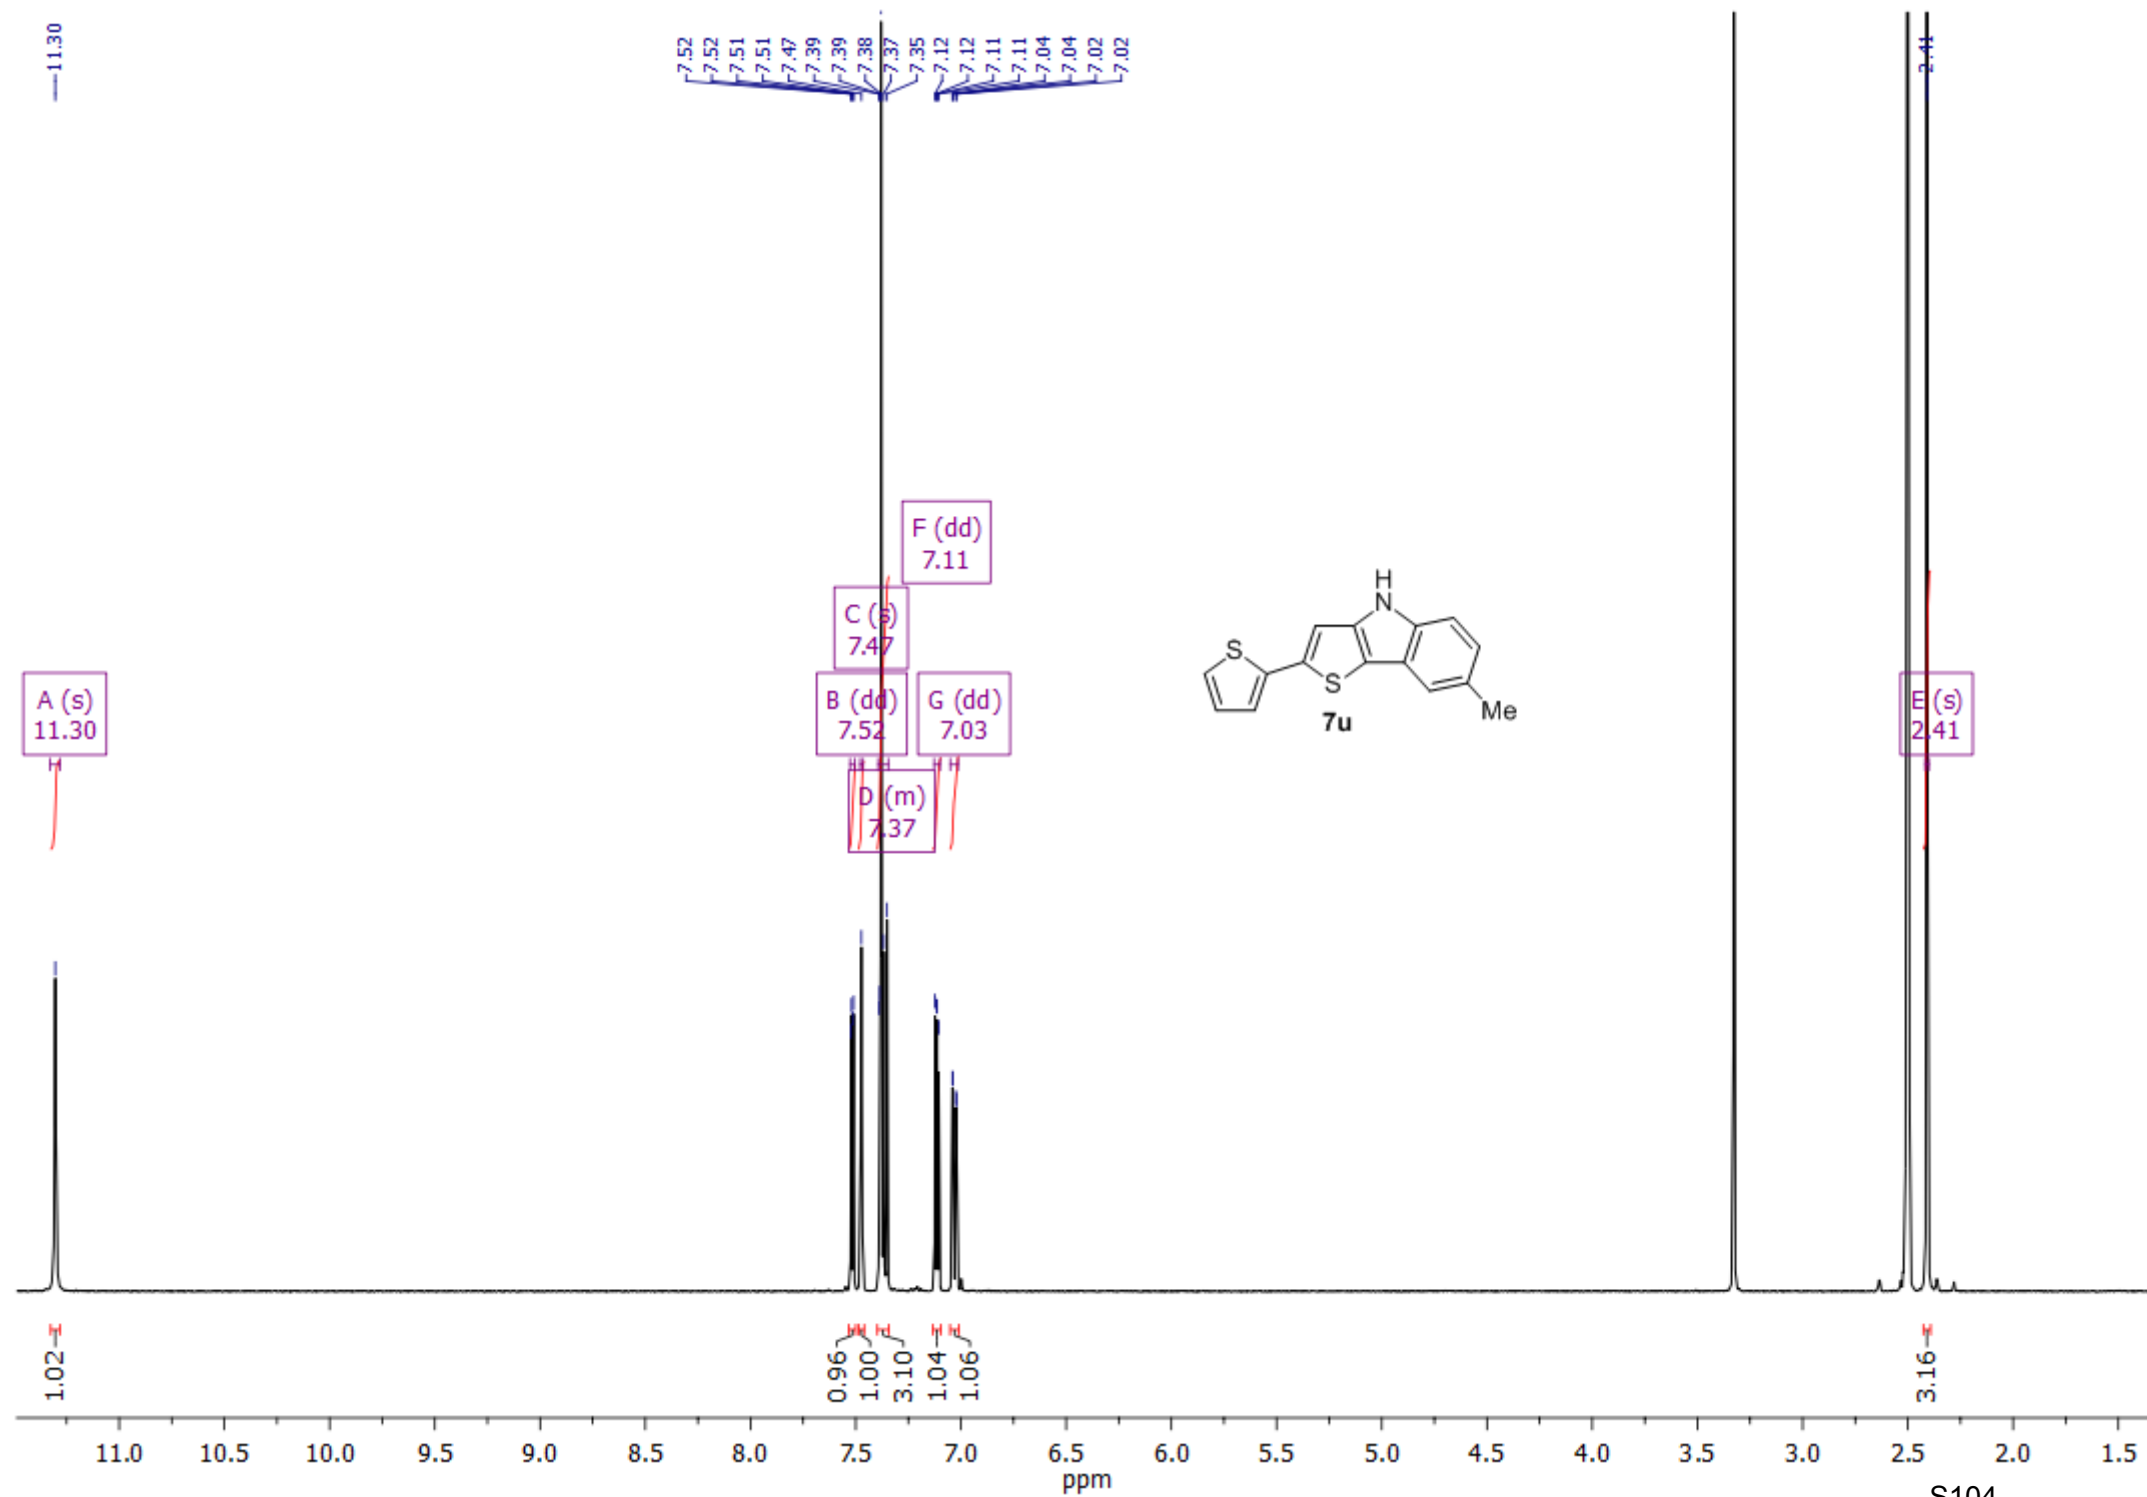



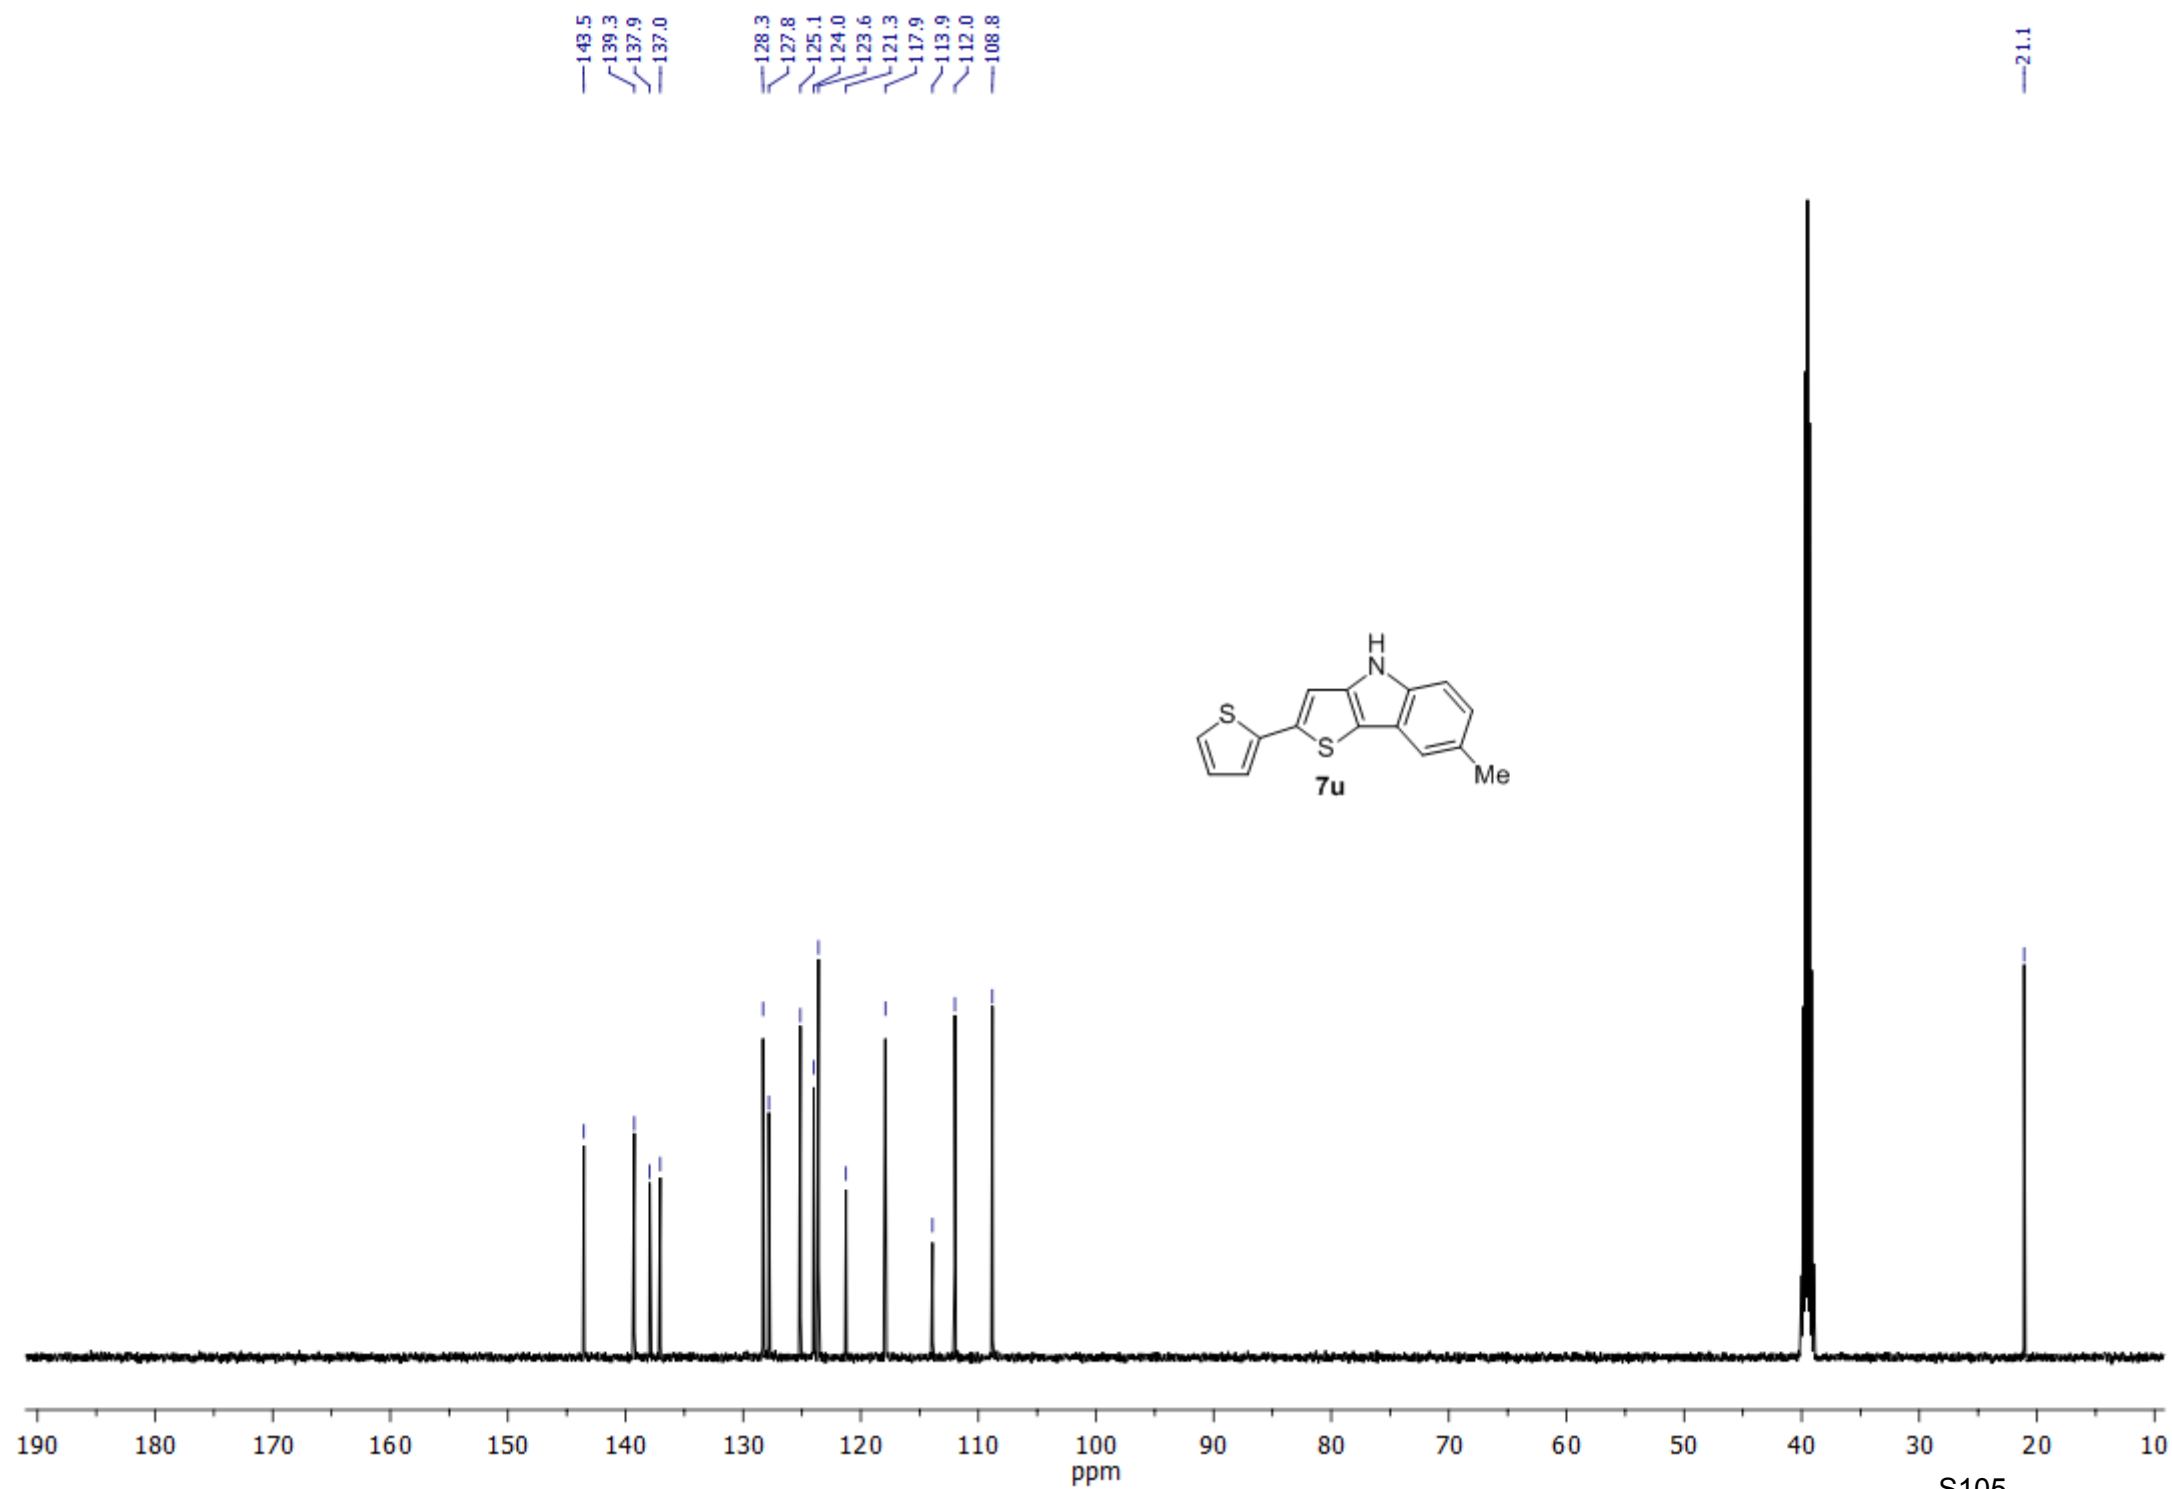

<sup>1</sup>H NMR (solvent: DMSO-*d*<sub>6</sub>)

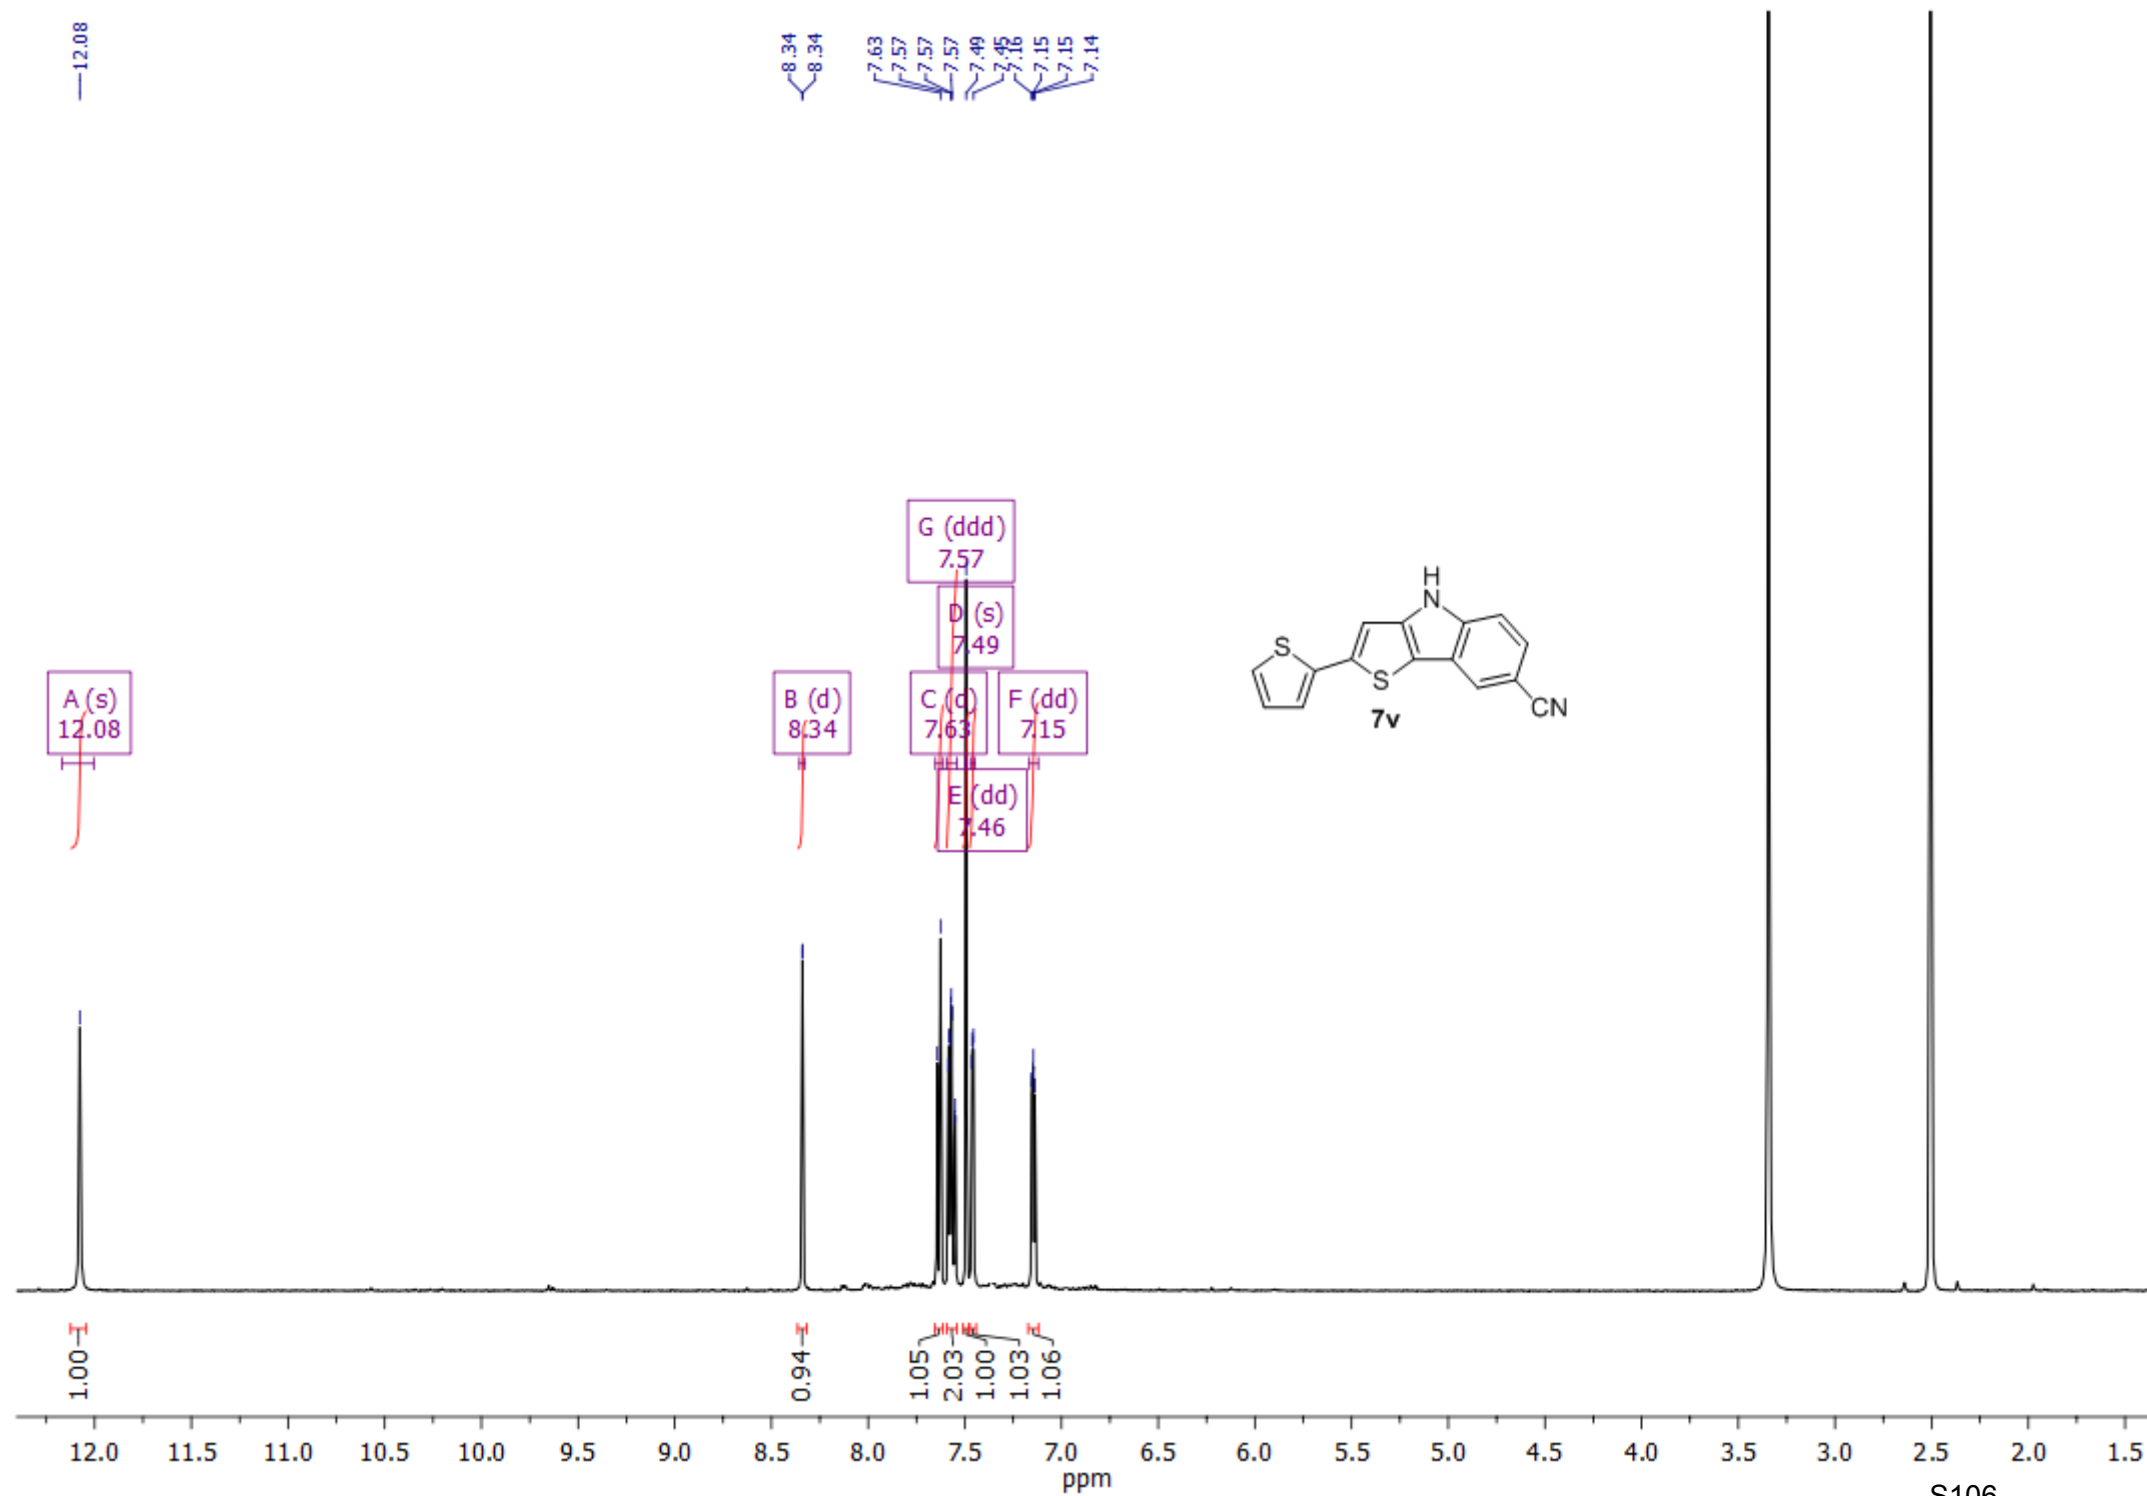

<sup>13</sup>C NMR (solvent: DMSO-*d*<sub>6</sub>)

145.0  
142.7  
139.7  
137.3  
128.5  
126.0  
125.2  
124.4  
123.6  
121.0  
120.5  
114.4  
113.3  
108.7  
101.0

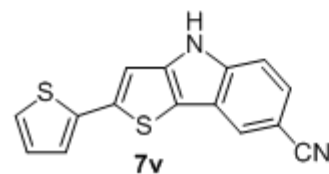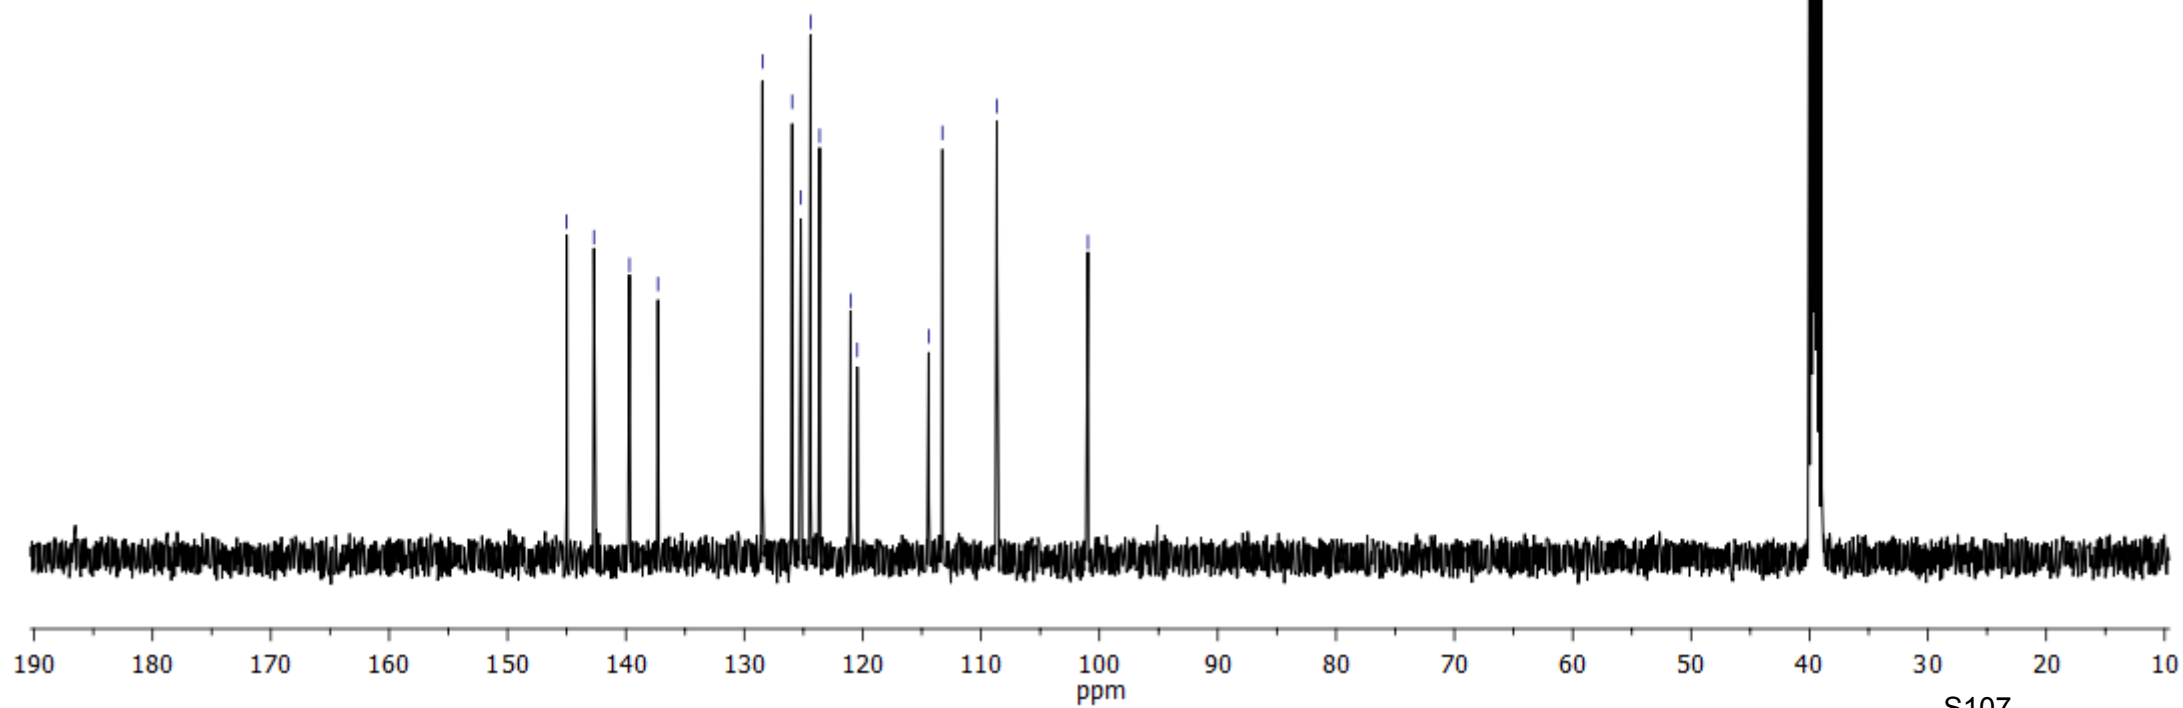

<sup>1</sup>H NMR (solvent: DMSO-*d*<sub>6</sub>)

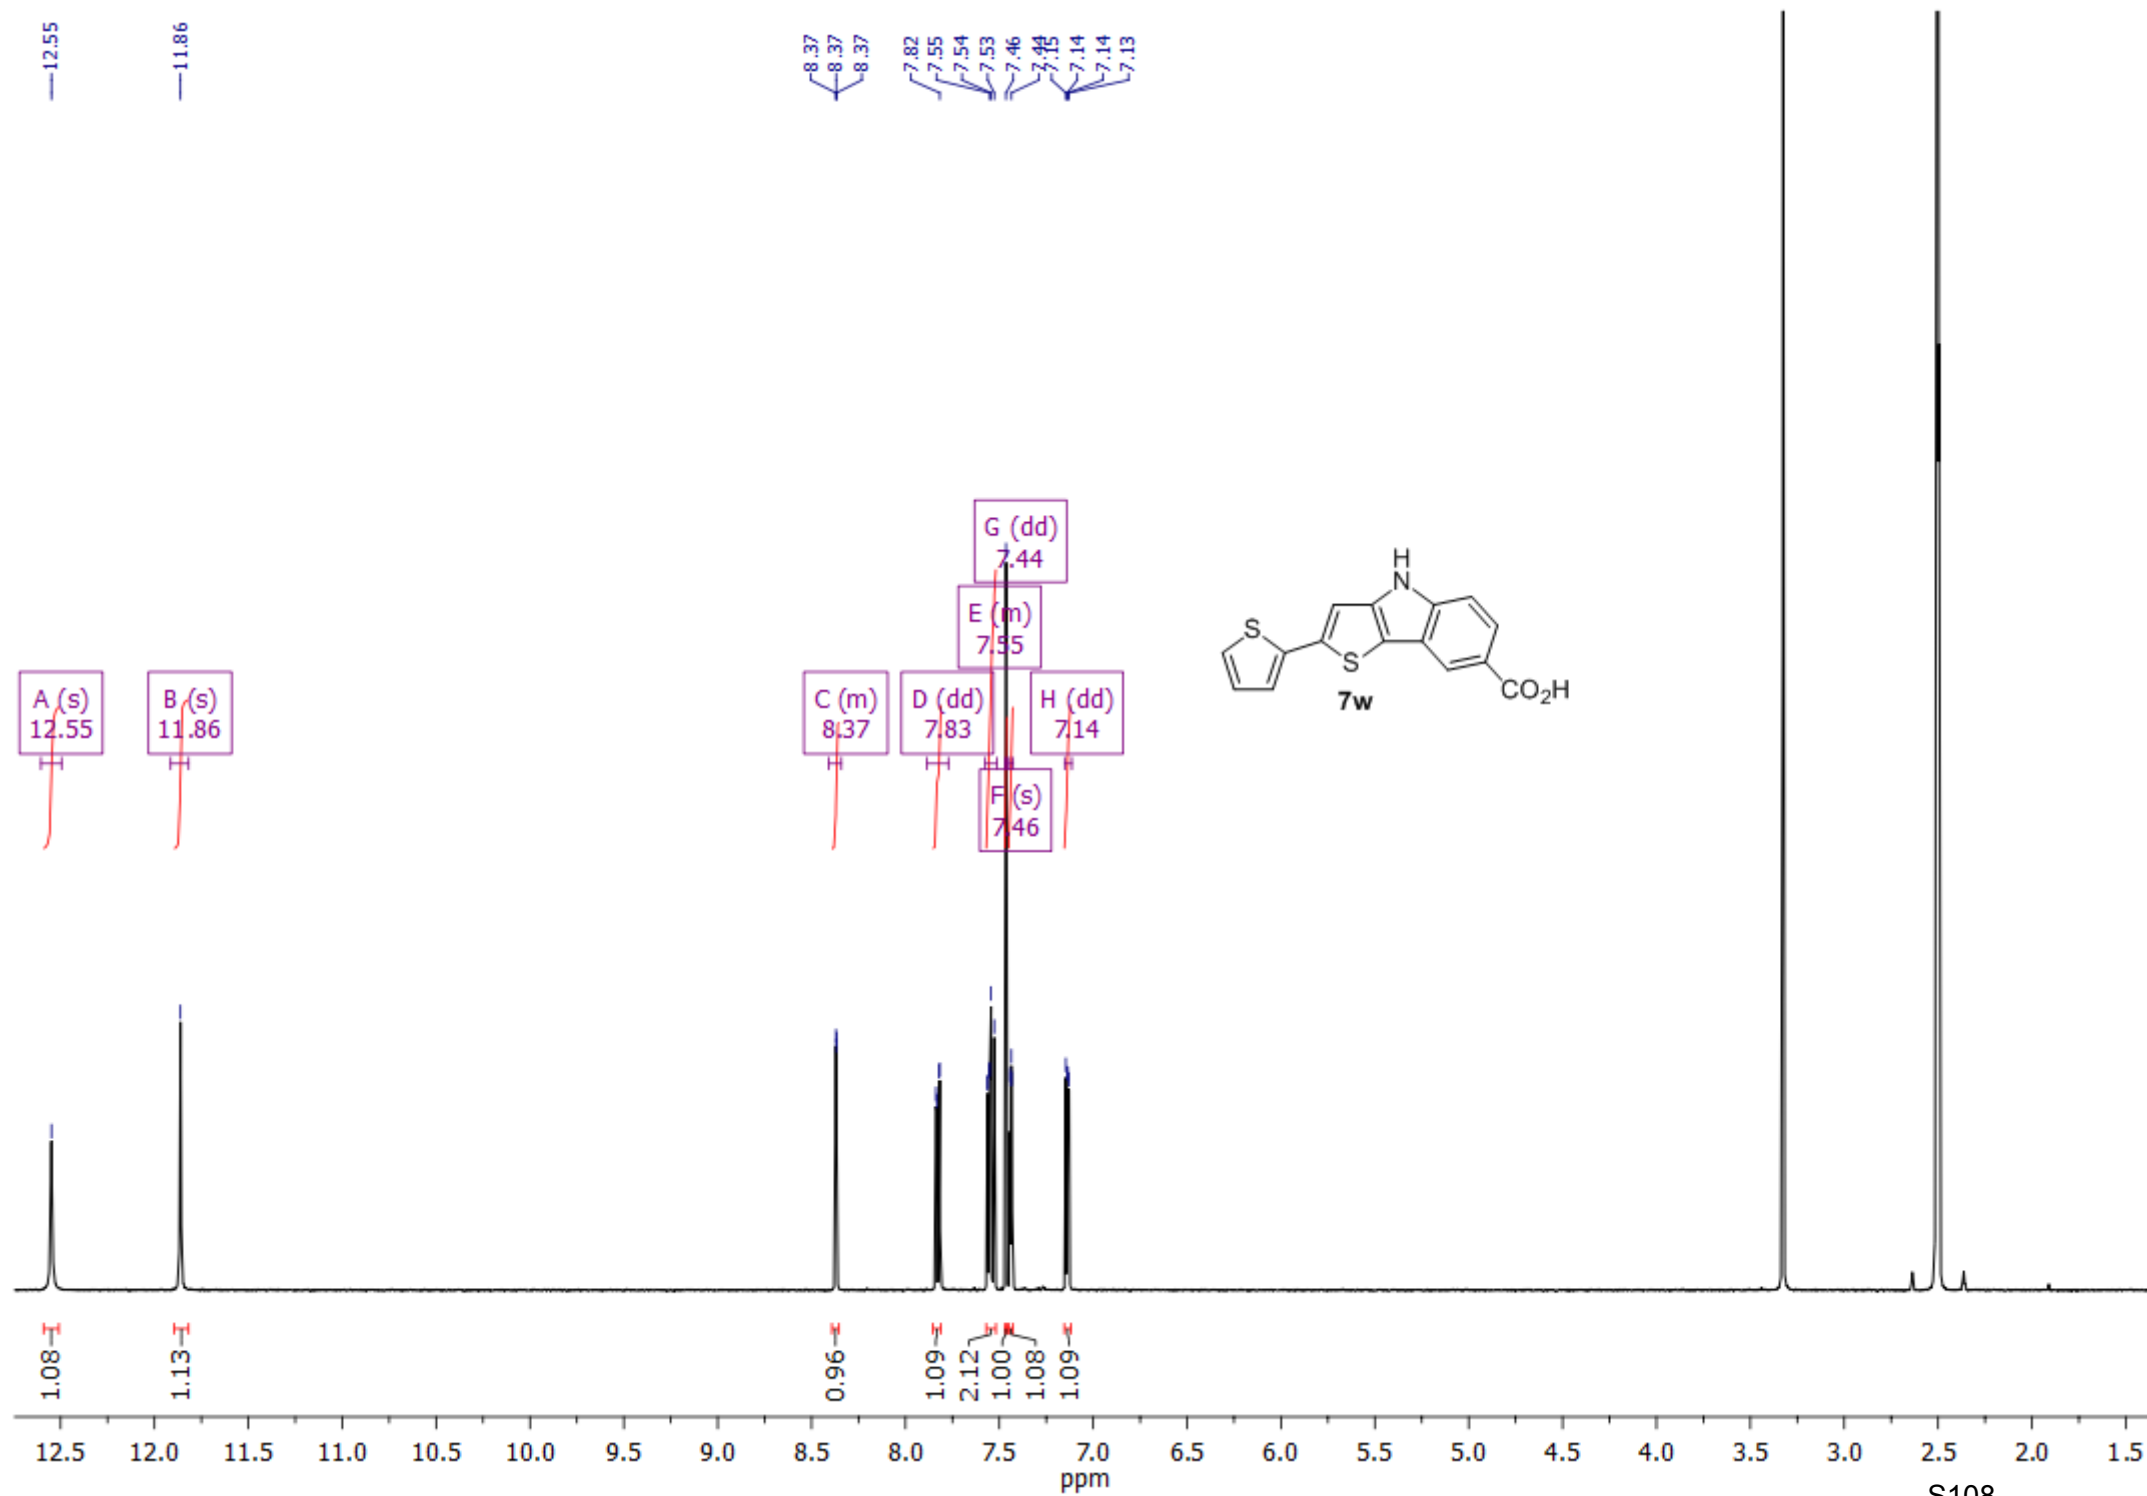

<sup>13</sup>C NMR (solvent: DMSO-*d*<sub>6</sub>)

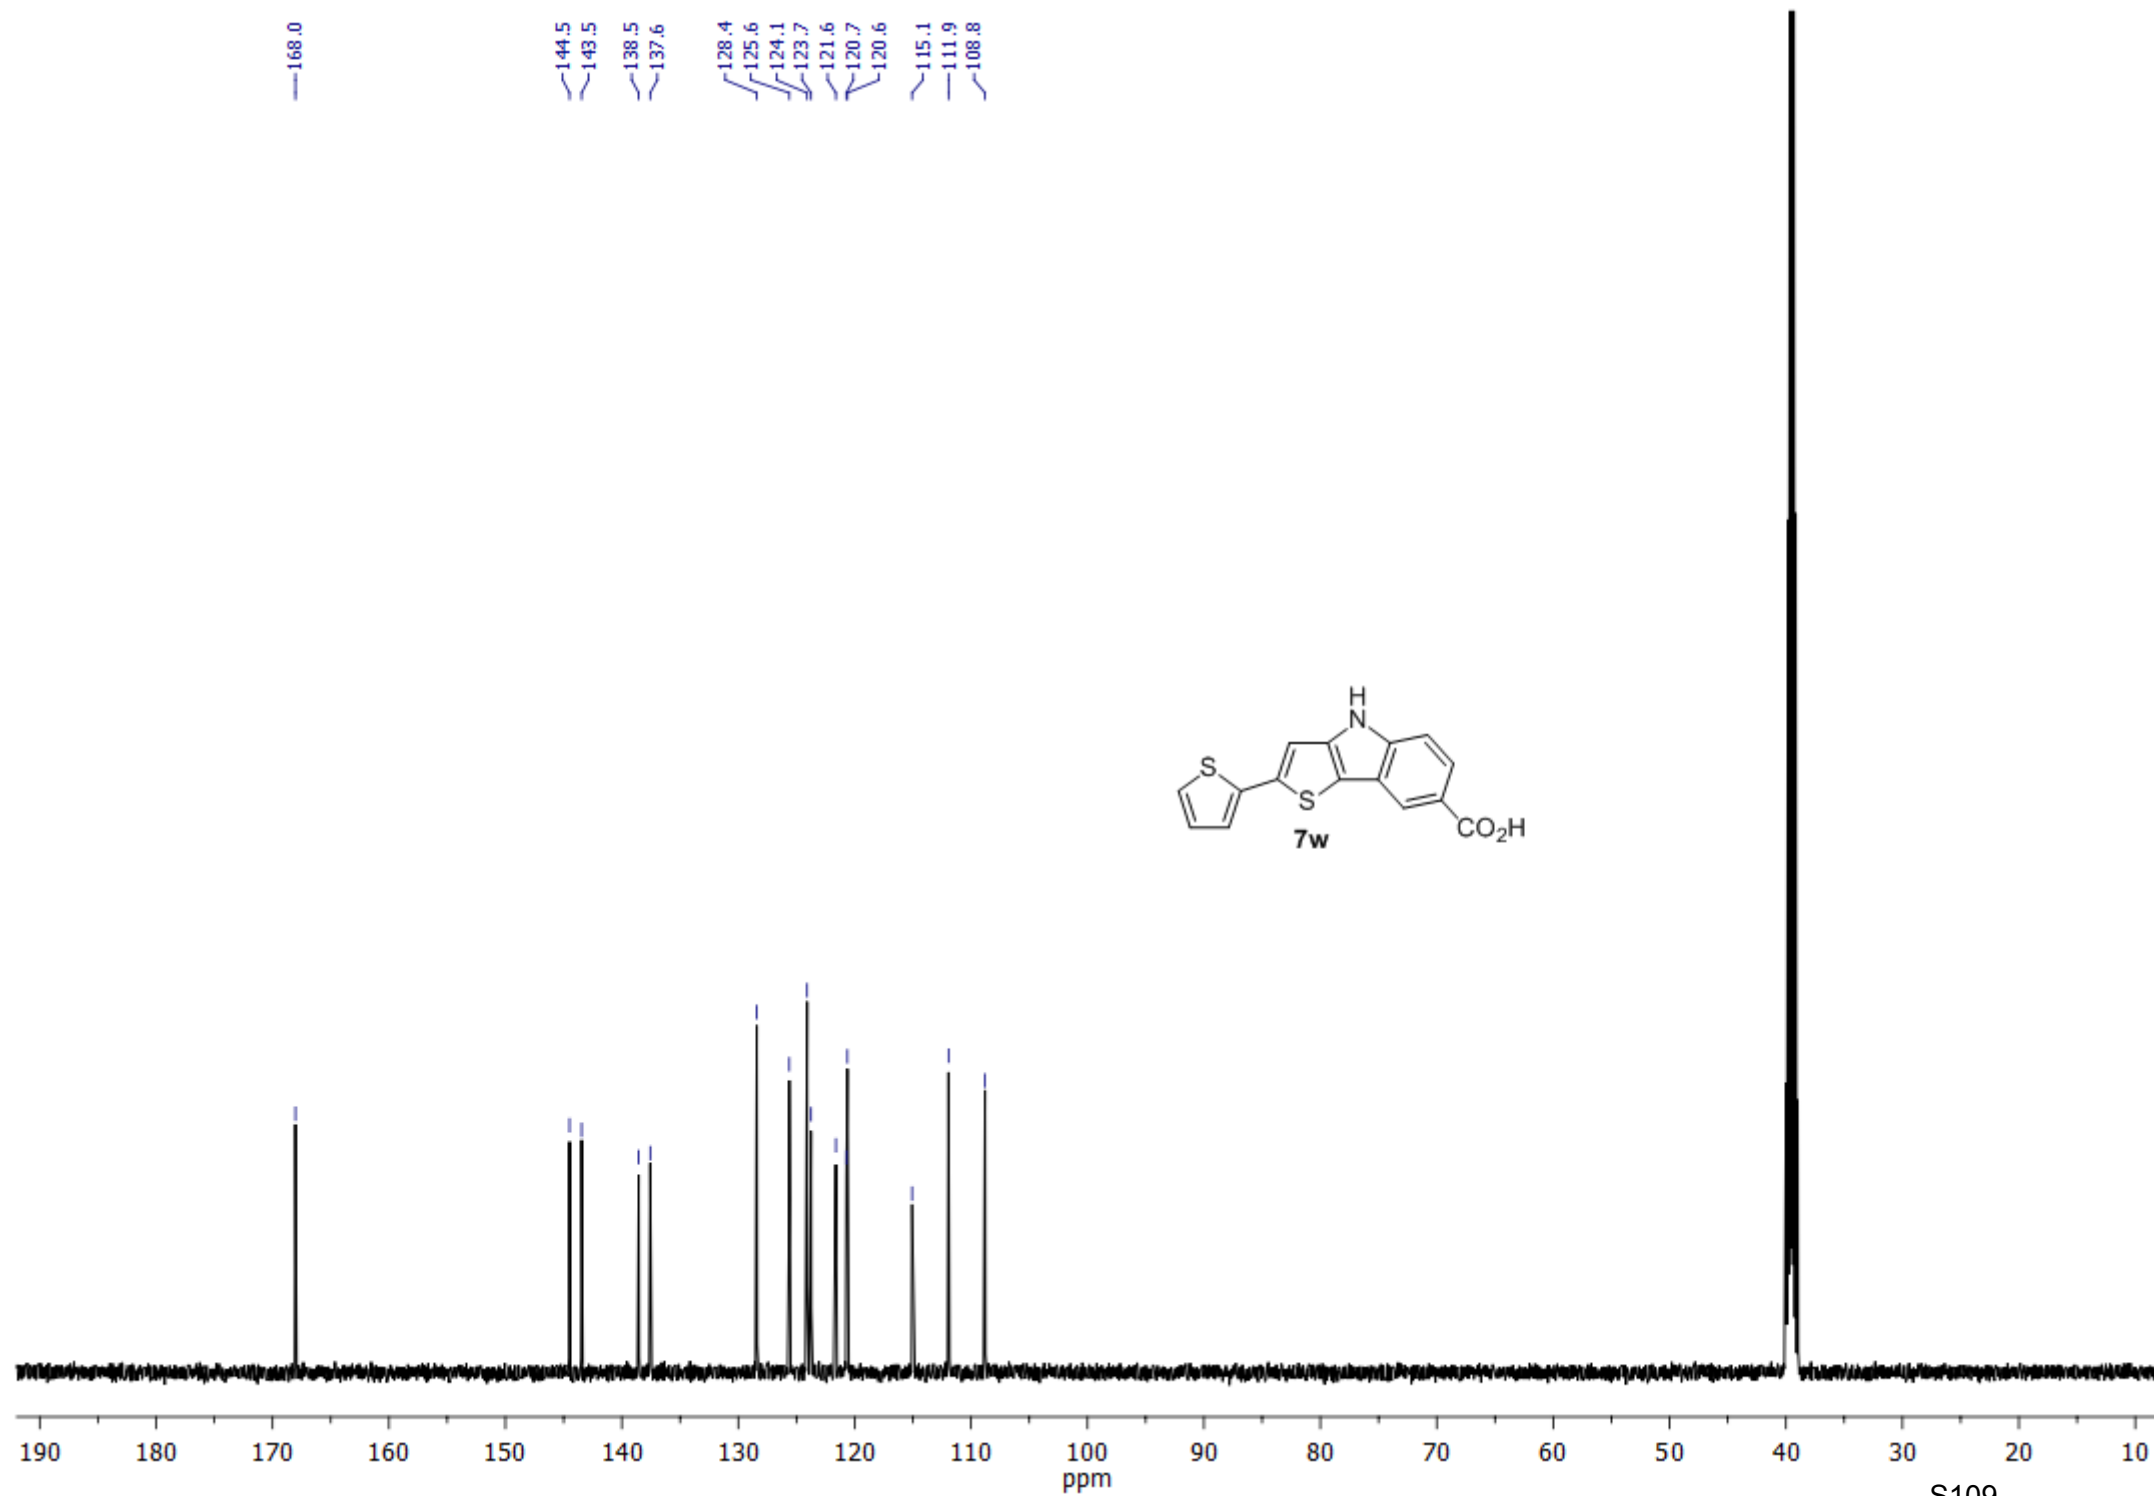

<sup>1</sup>H NMR (solvent: DMSO-*d*<sub>6</sub>)

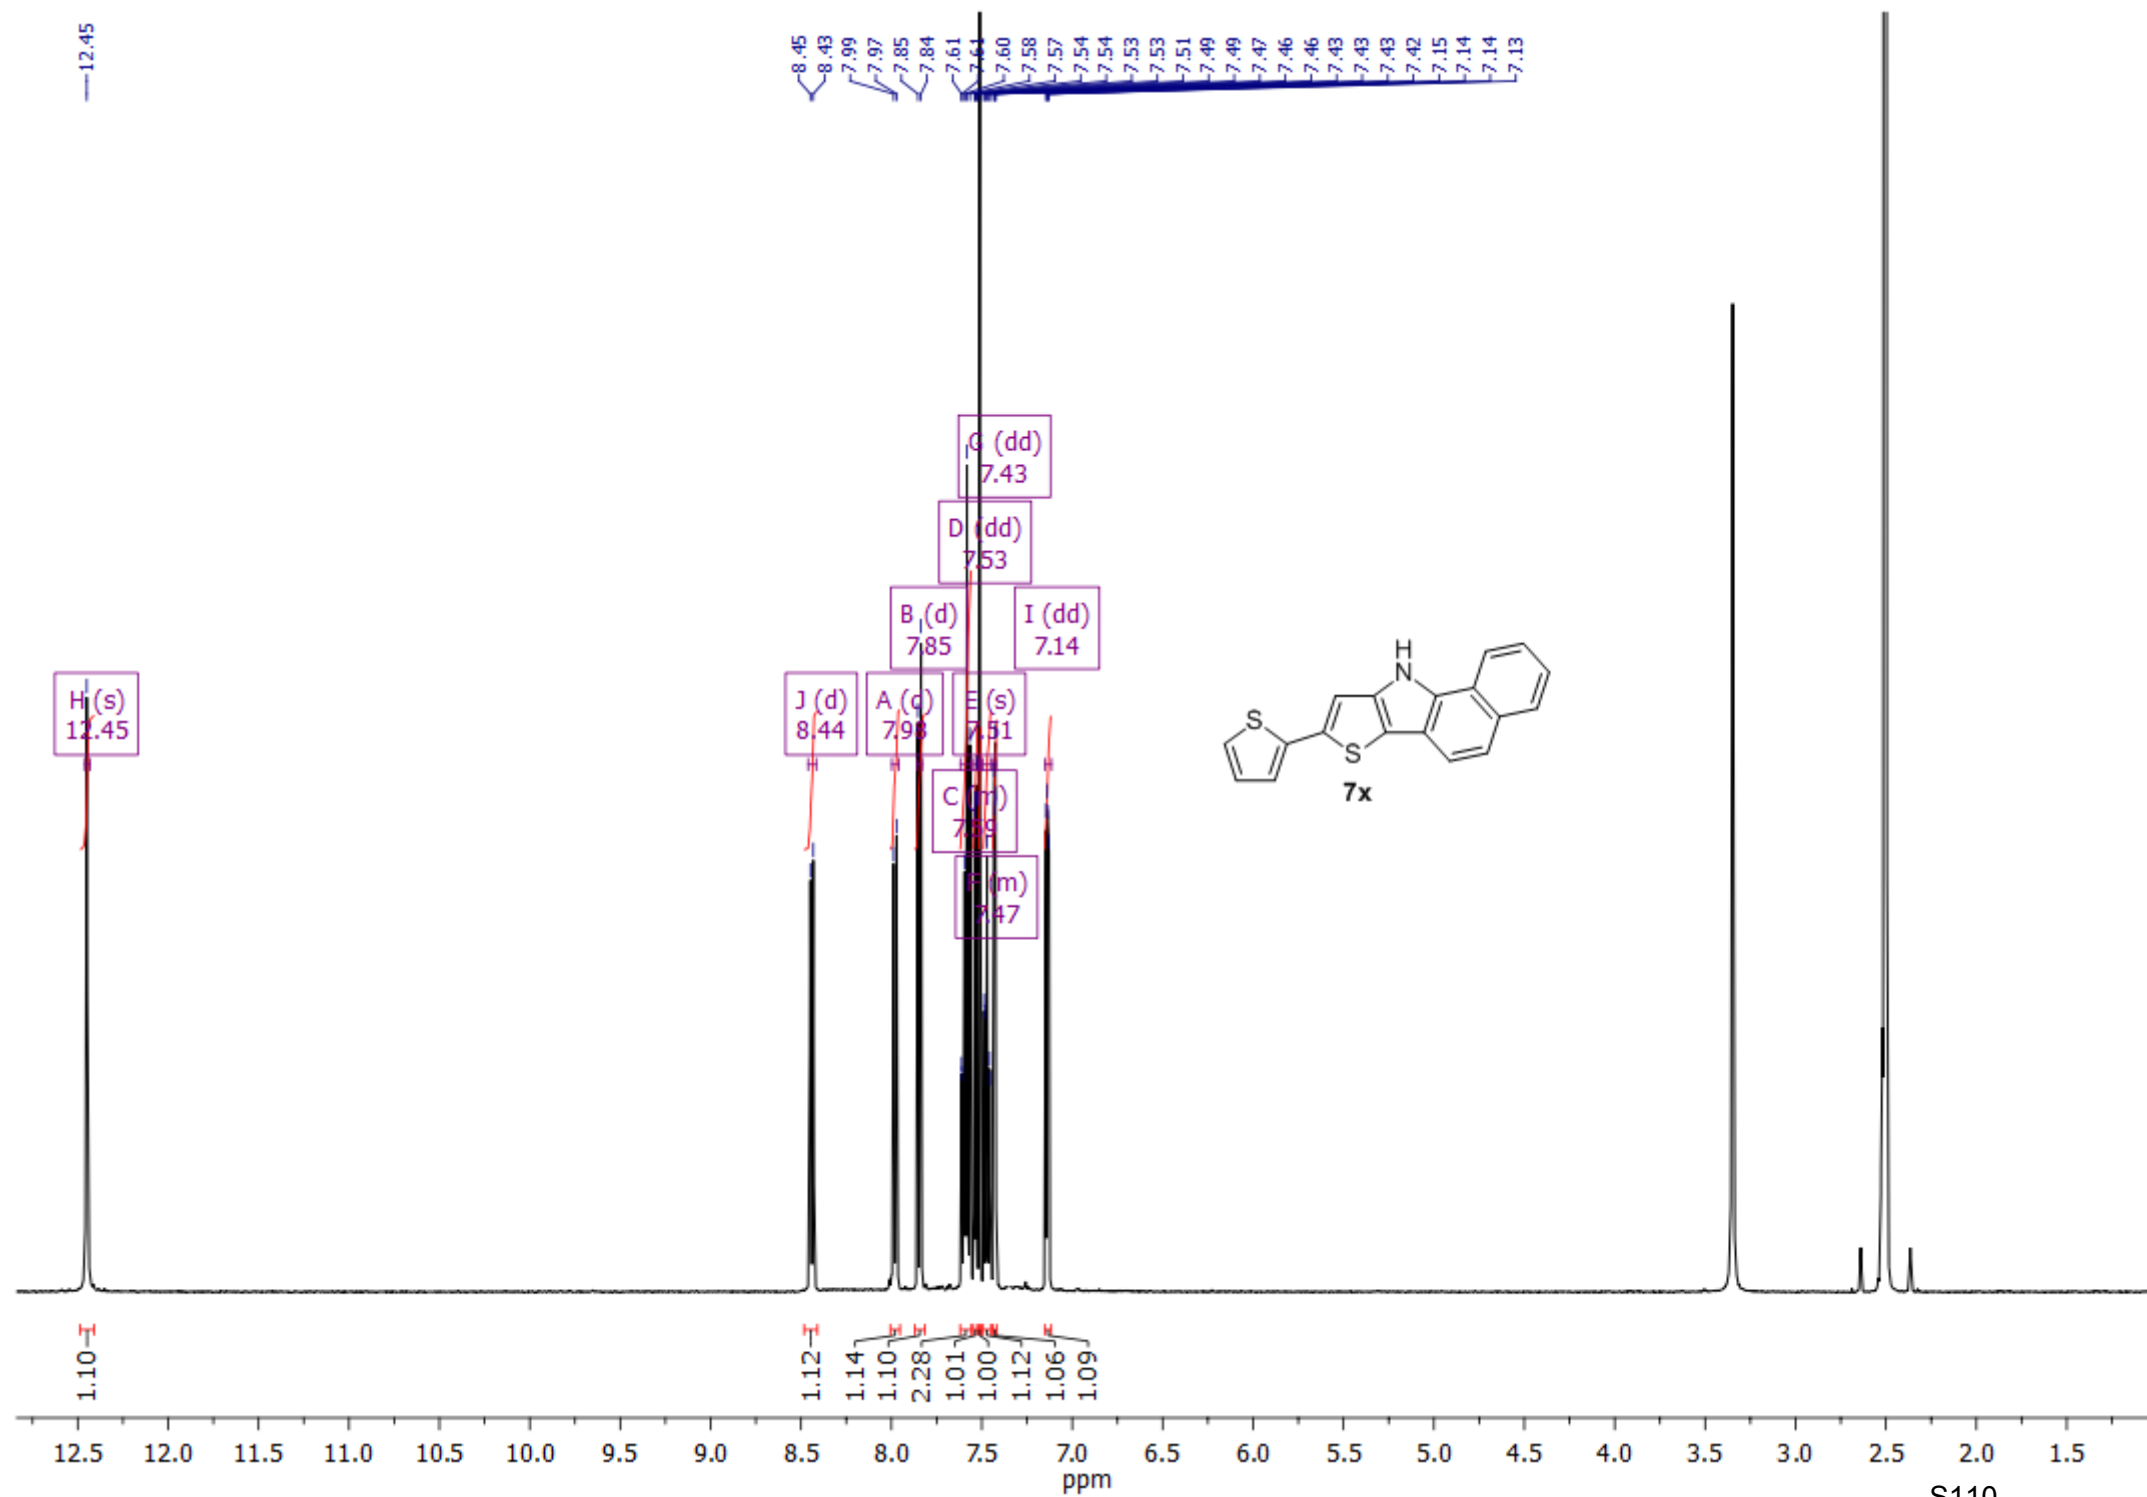

142.0  
138.0  
136.5  
135.5  
130.1  
128.6  
128.3  
125.6  
125.1  
124.2  
123.7  
121.0  
120.0  
118.5  
108.7

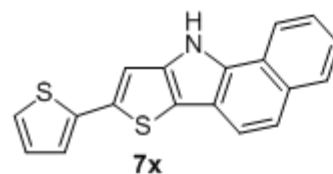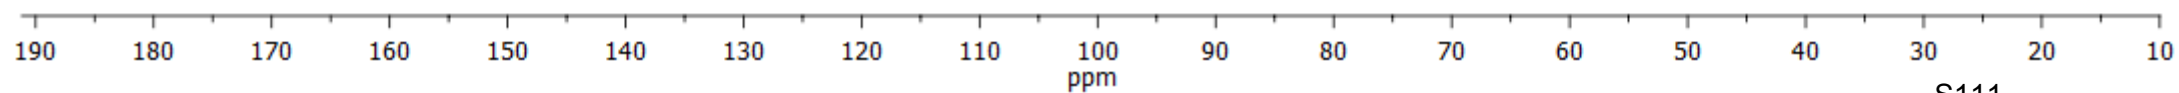

<sup>1</sup>H NMR (solvent: DMSO-*d*<sub>6</sub>)

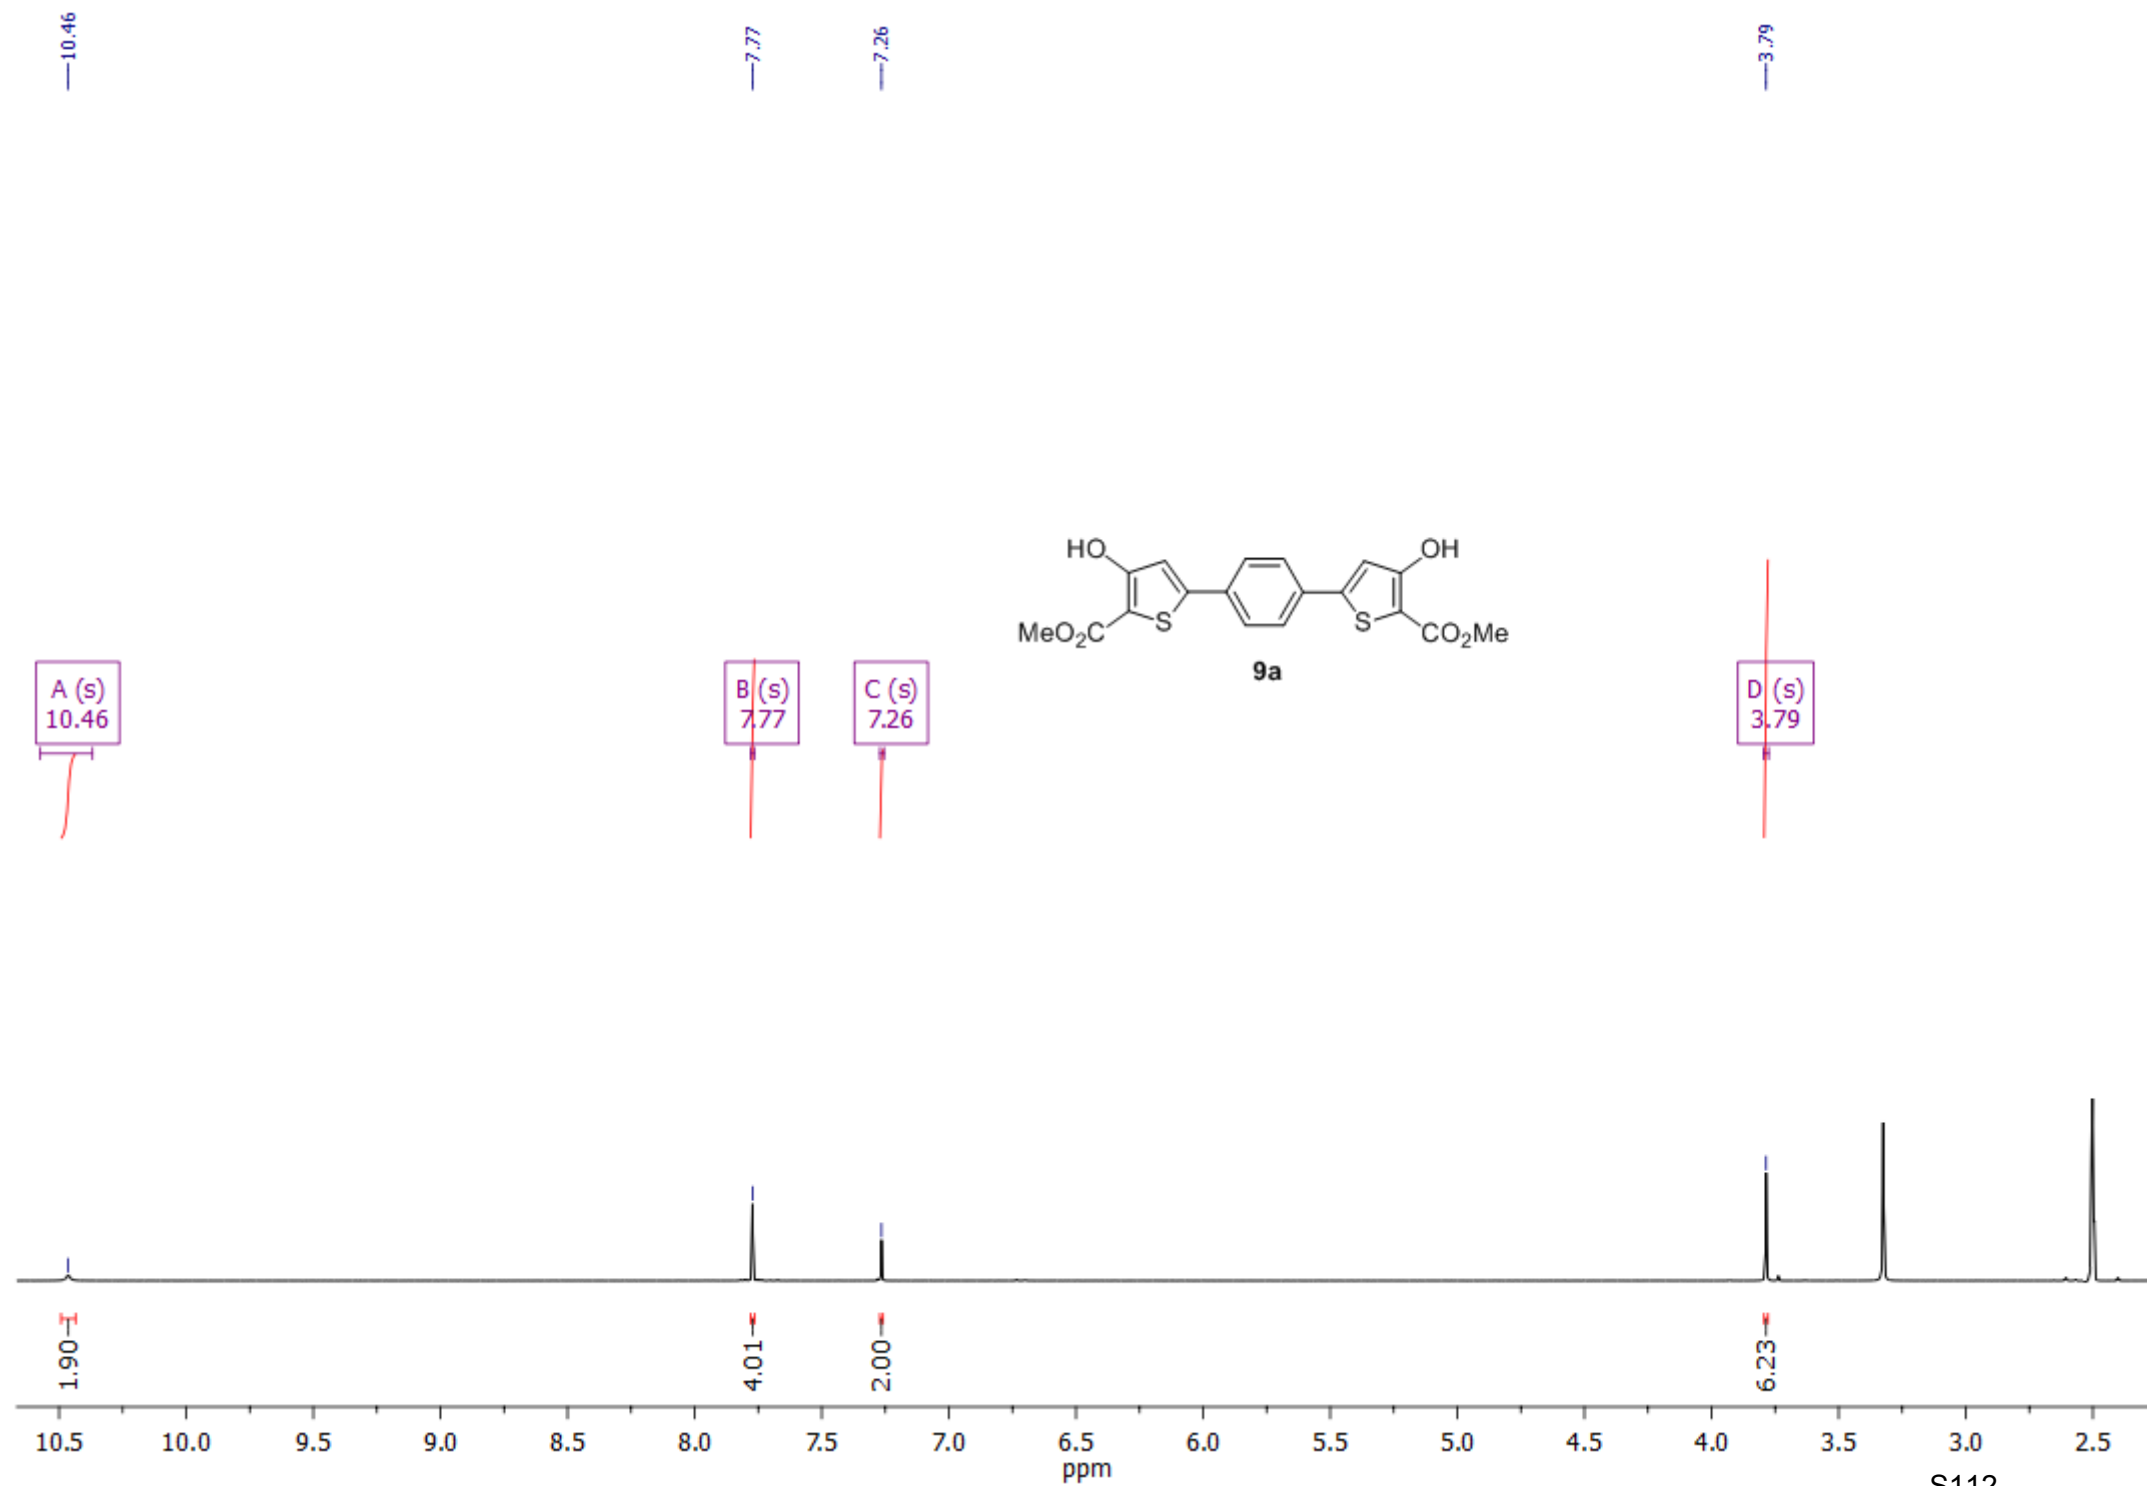



<sup>13</sup>C NMR (solvent: DMSO-*d*<sub>6</sub>)

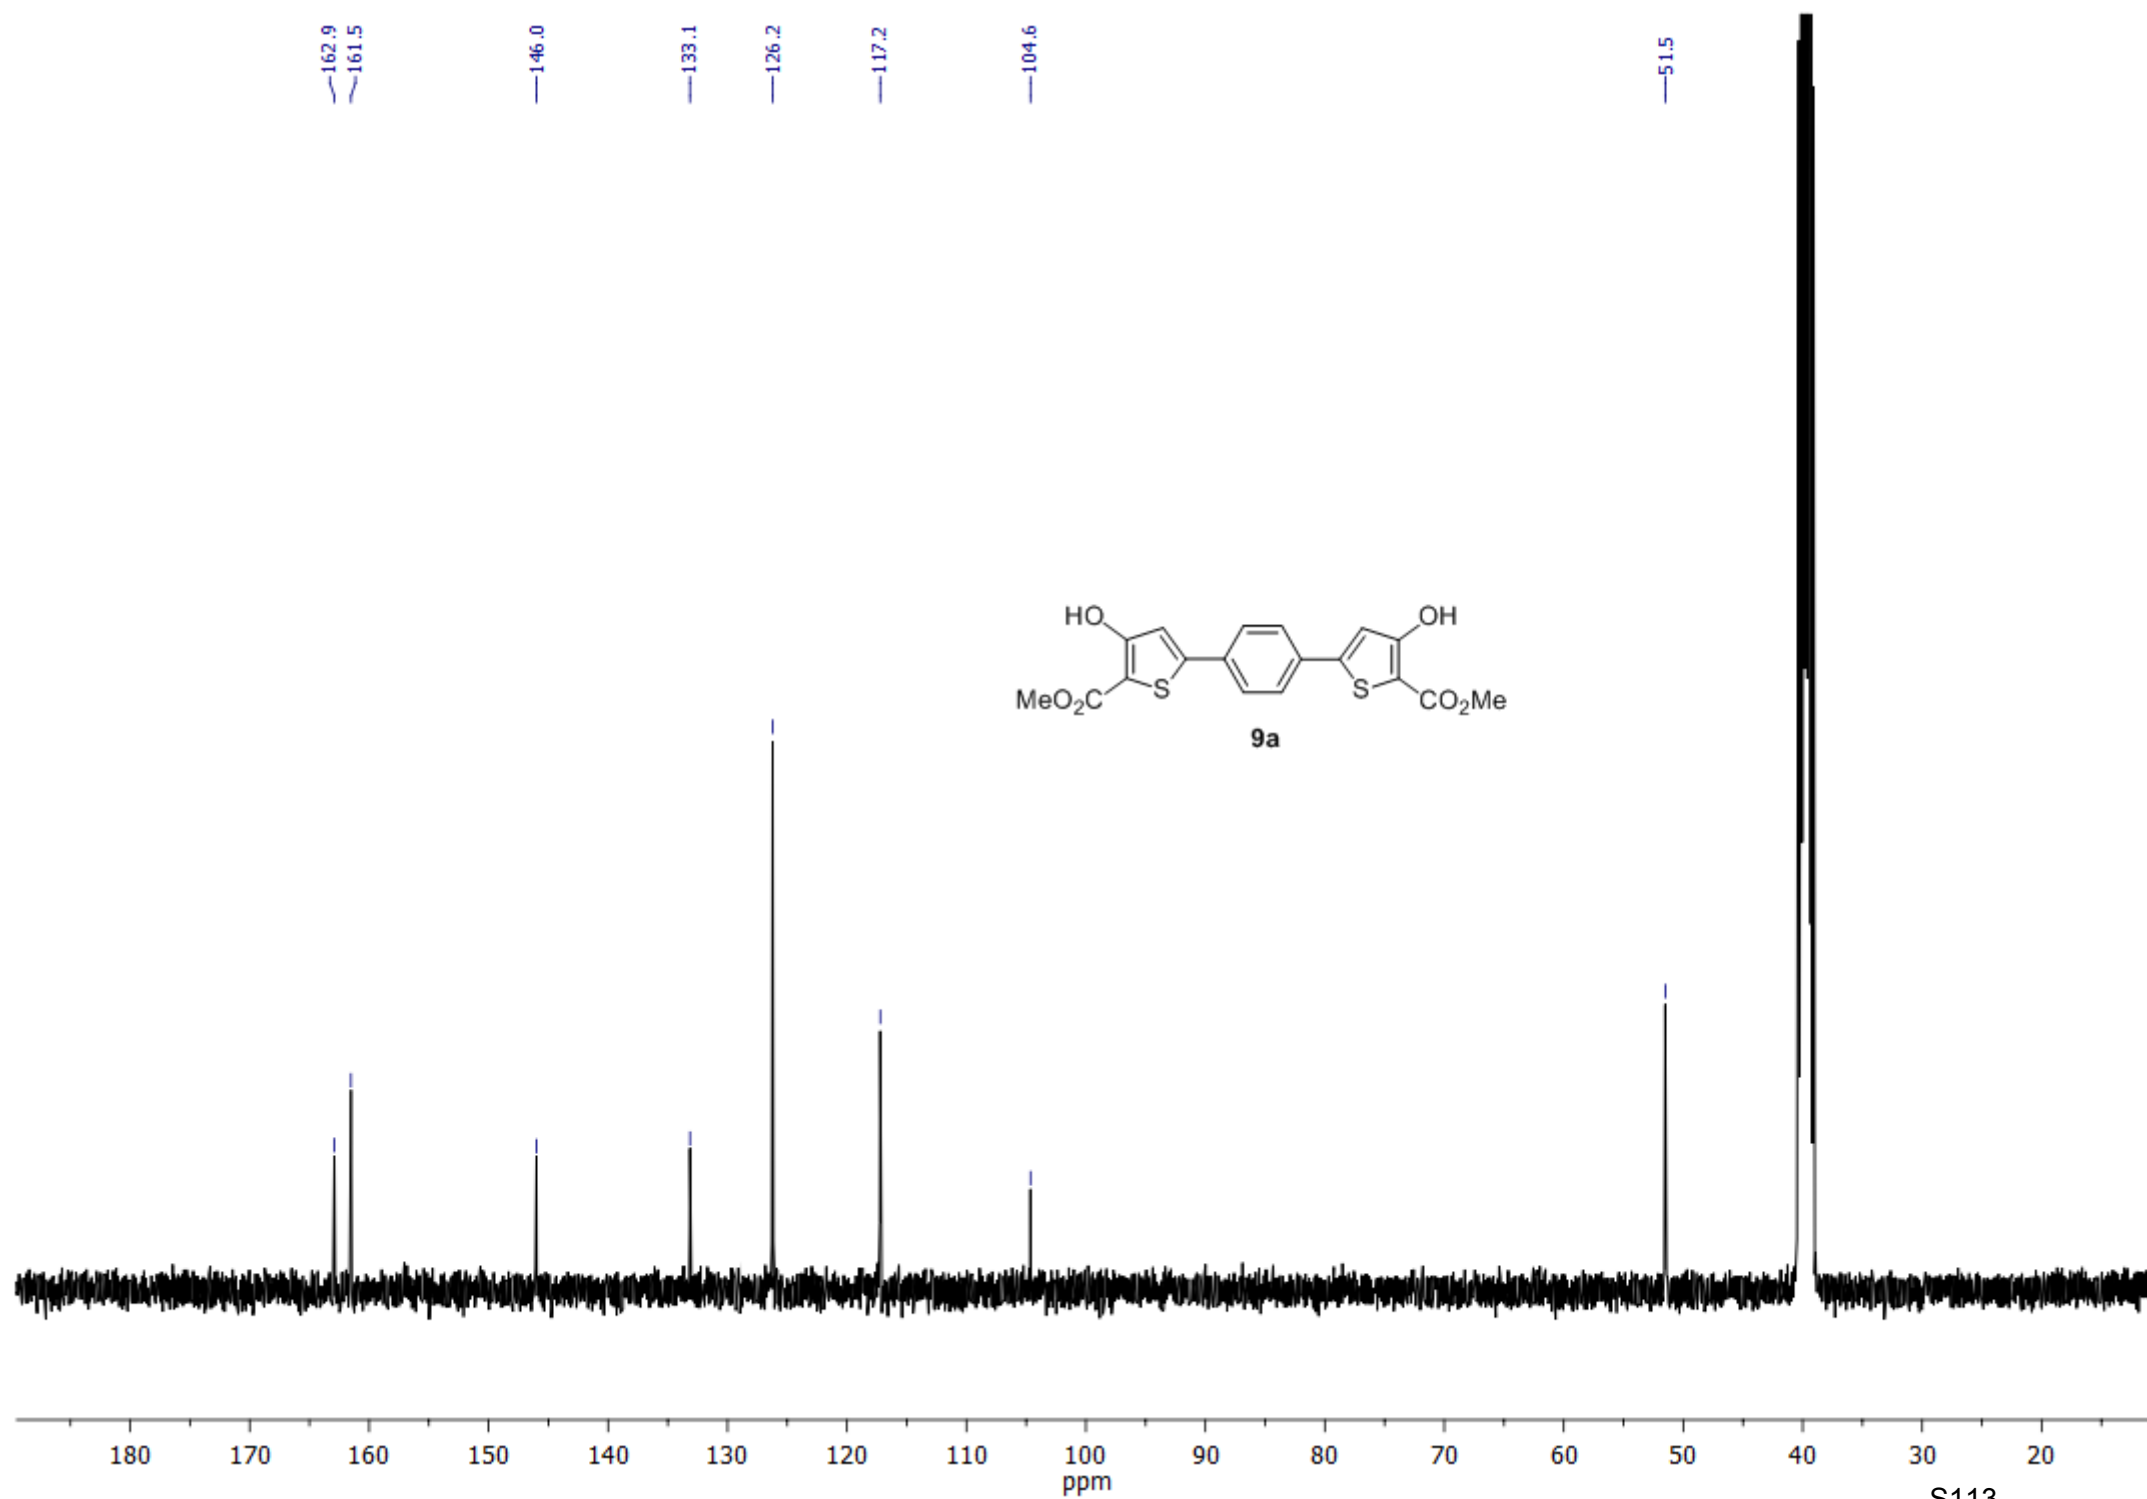

<sup>1</sup>H NMR (solvent: DMSO-*d*<sub>6</sub>)

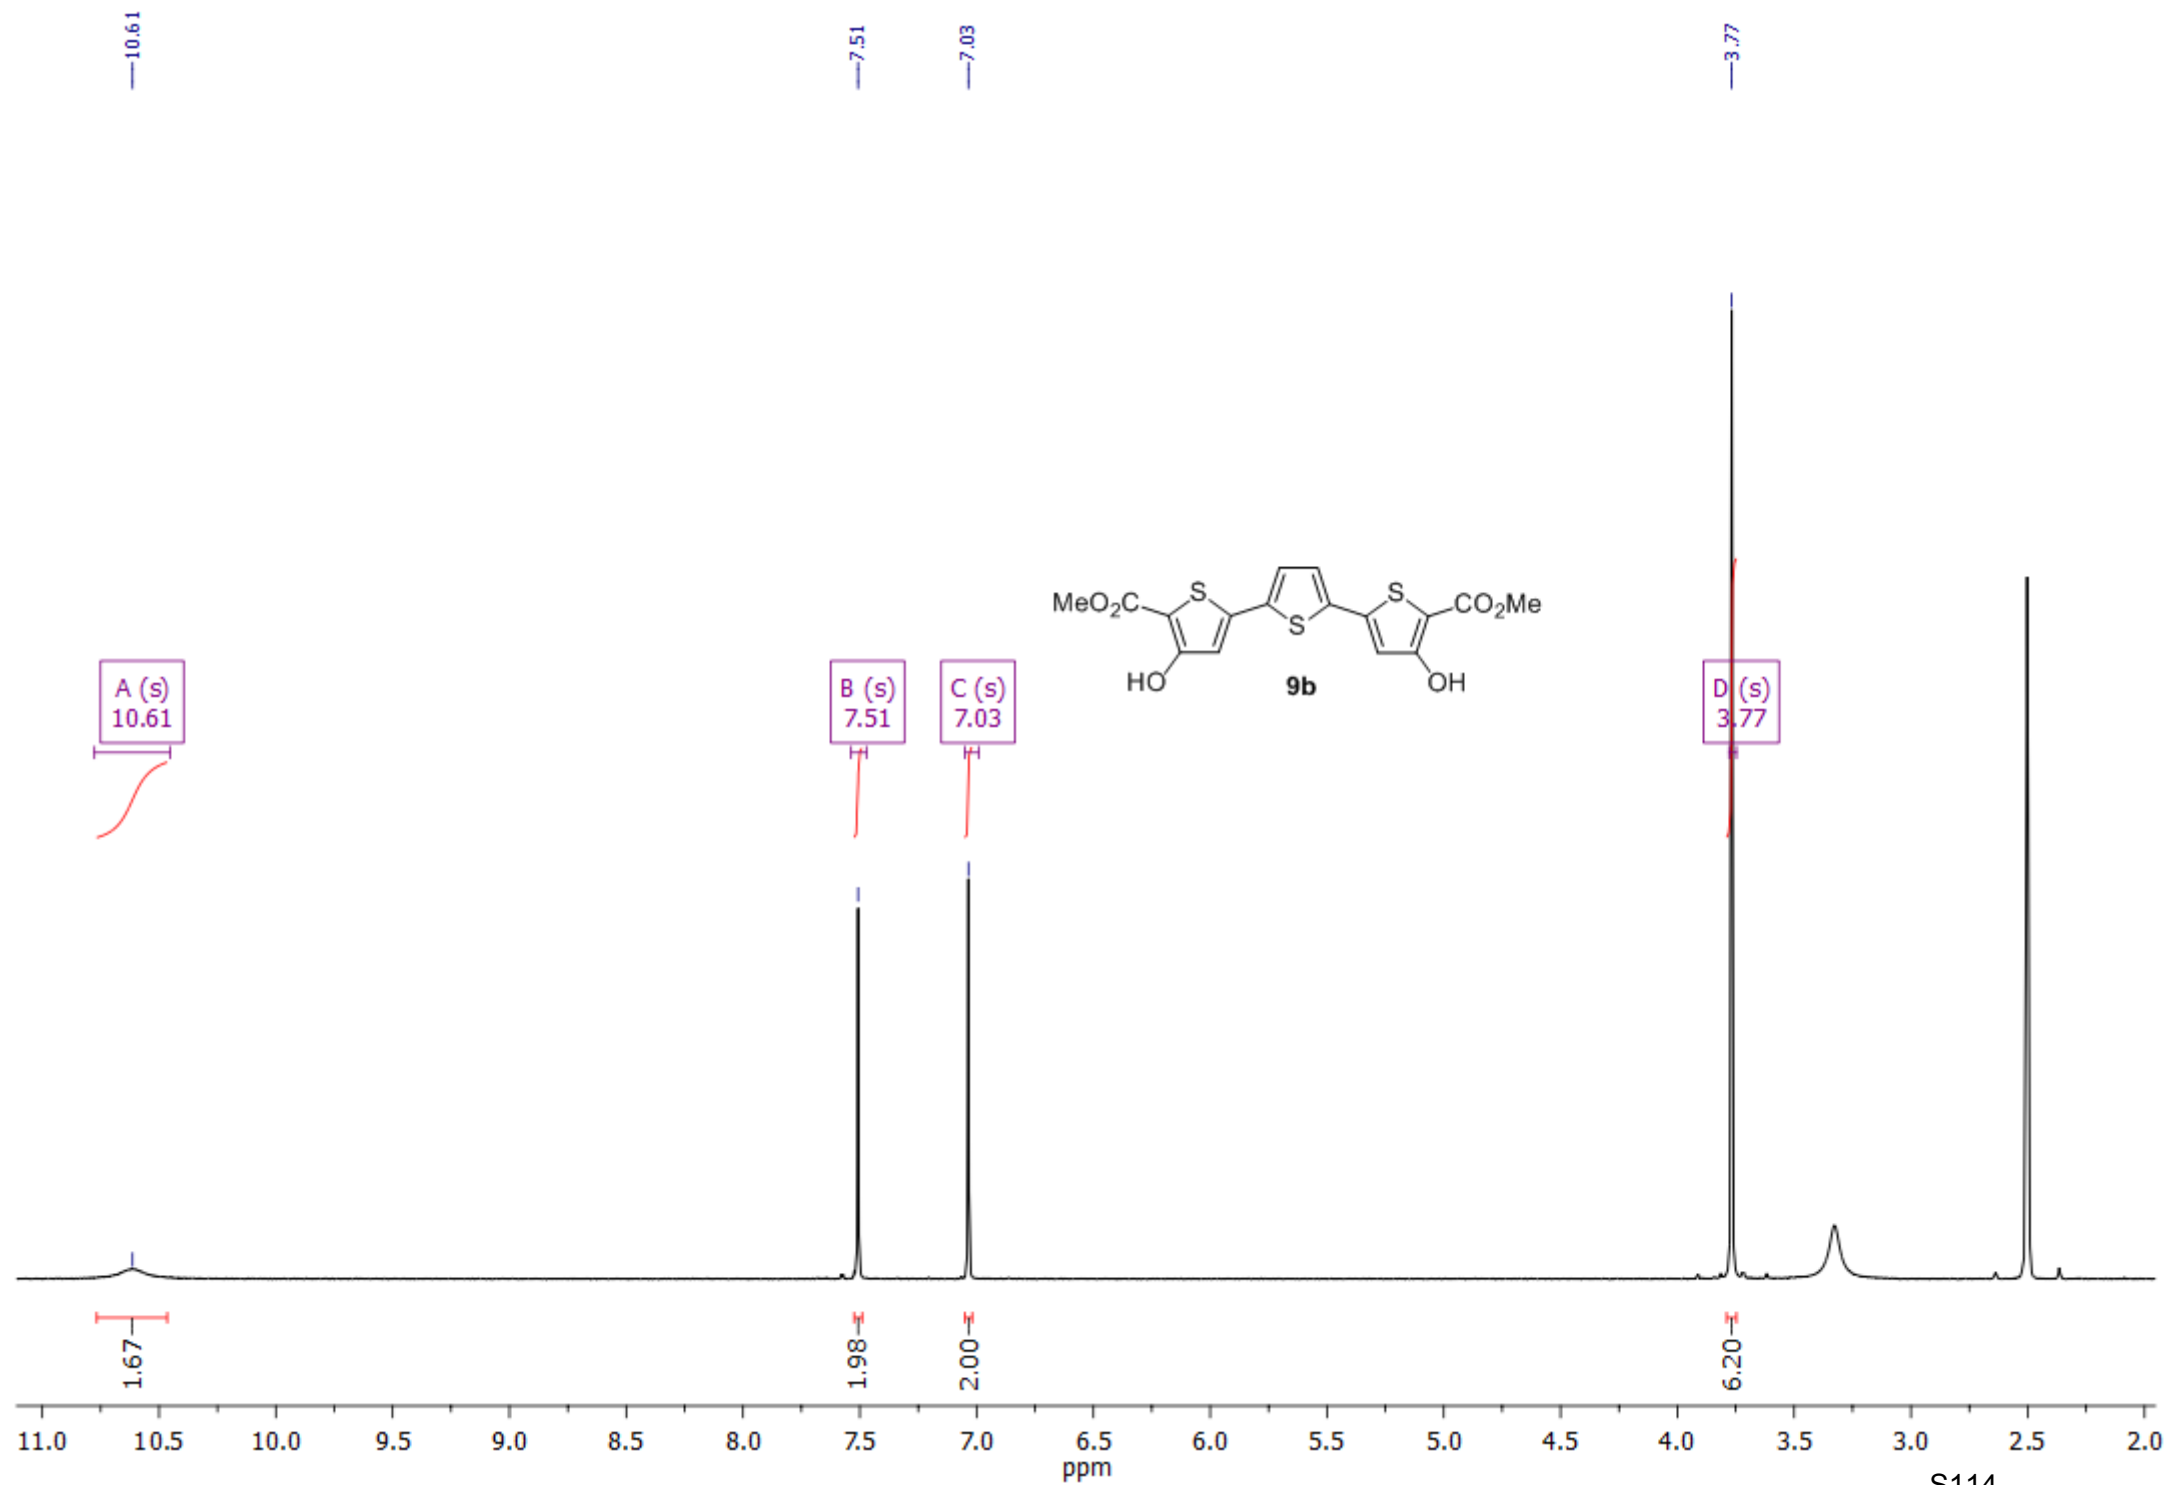

$^{13}\text{C}$  NMR (solvent:  $\text{DMSO-}d_6$ )

162.6  
161.1

139.2

136.1

127.1

117.1

104.1

51.5

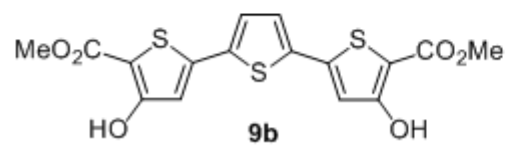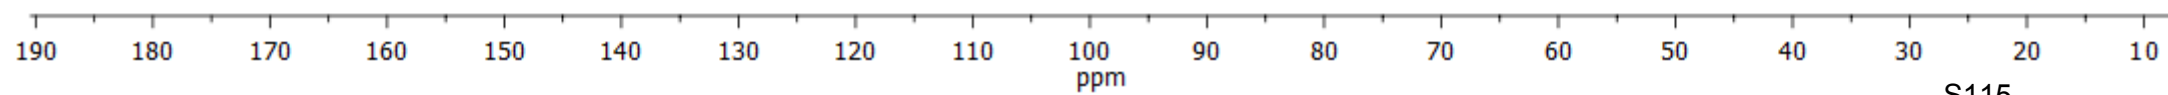

<sup>1</sup>H NMR (solvent: DMSO-*d*<sub>6</sub>), enol (3-hydroxythiophene) form of compound **10a**

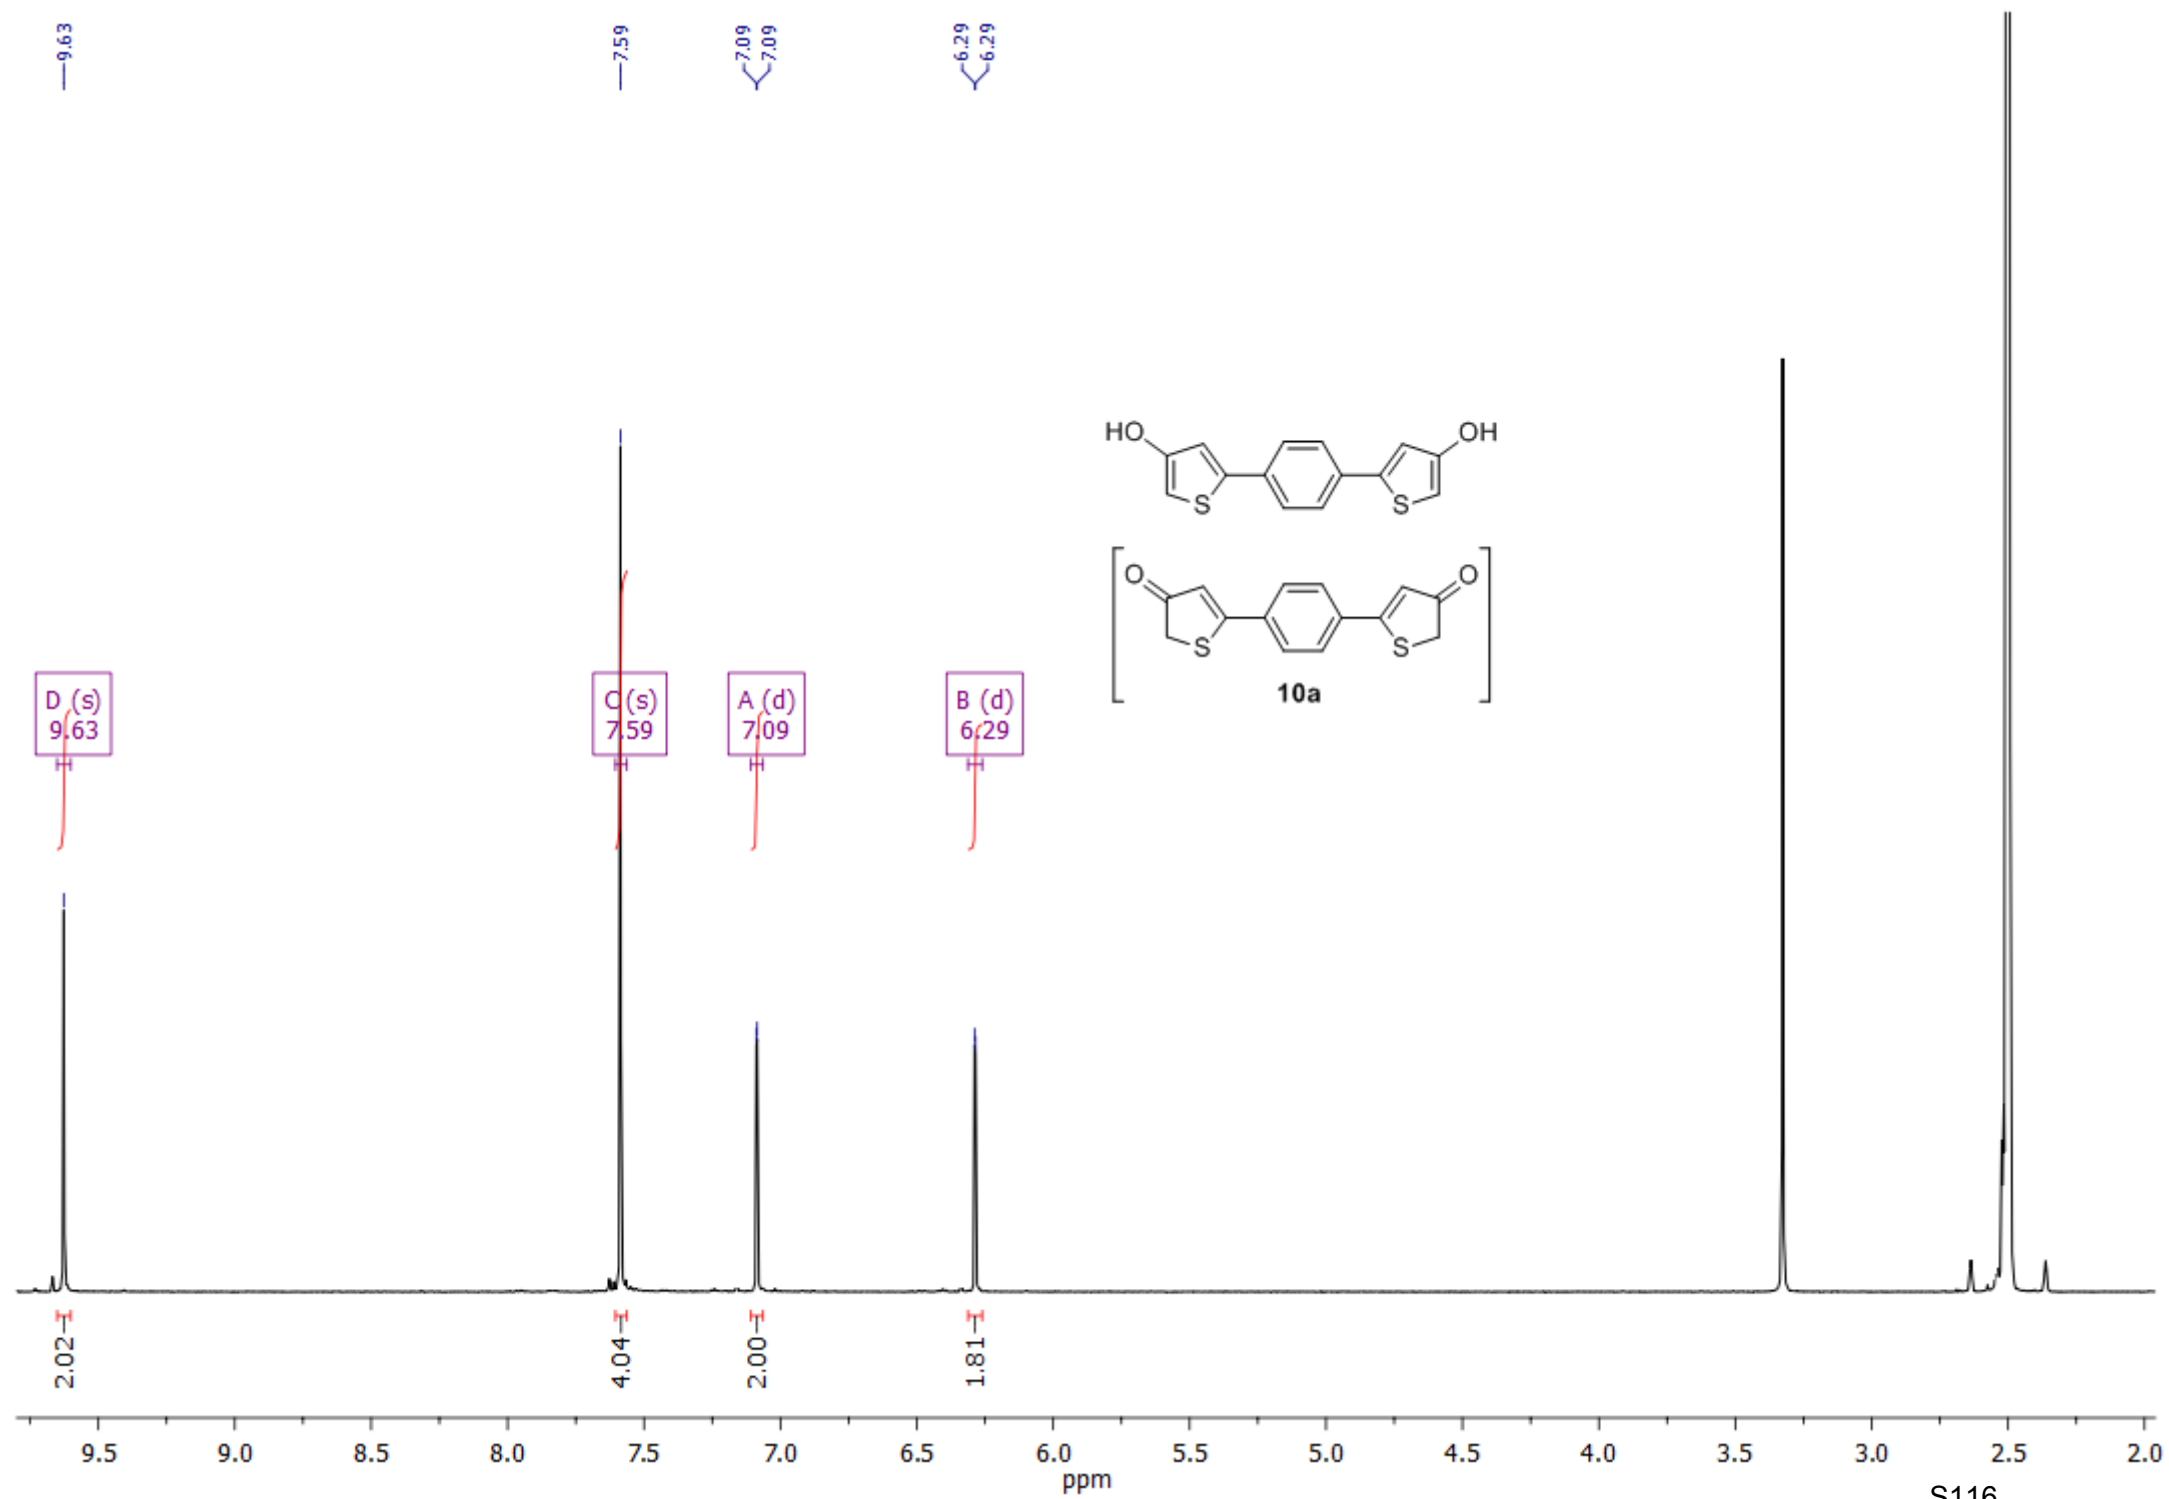

<sup>13</sup>C NMR (solvent: DMSO-*d*<sub>6</sub>), enol (3-hydroxythiophene) form of compound **10a**

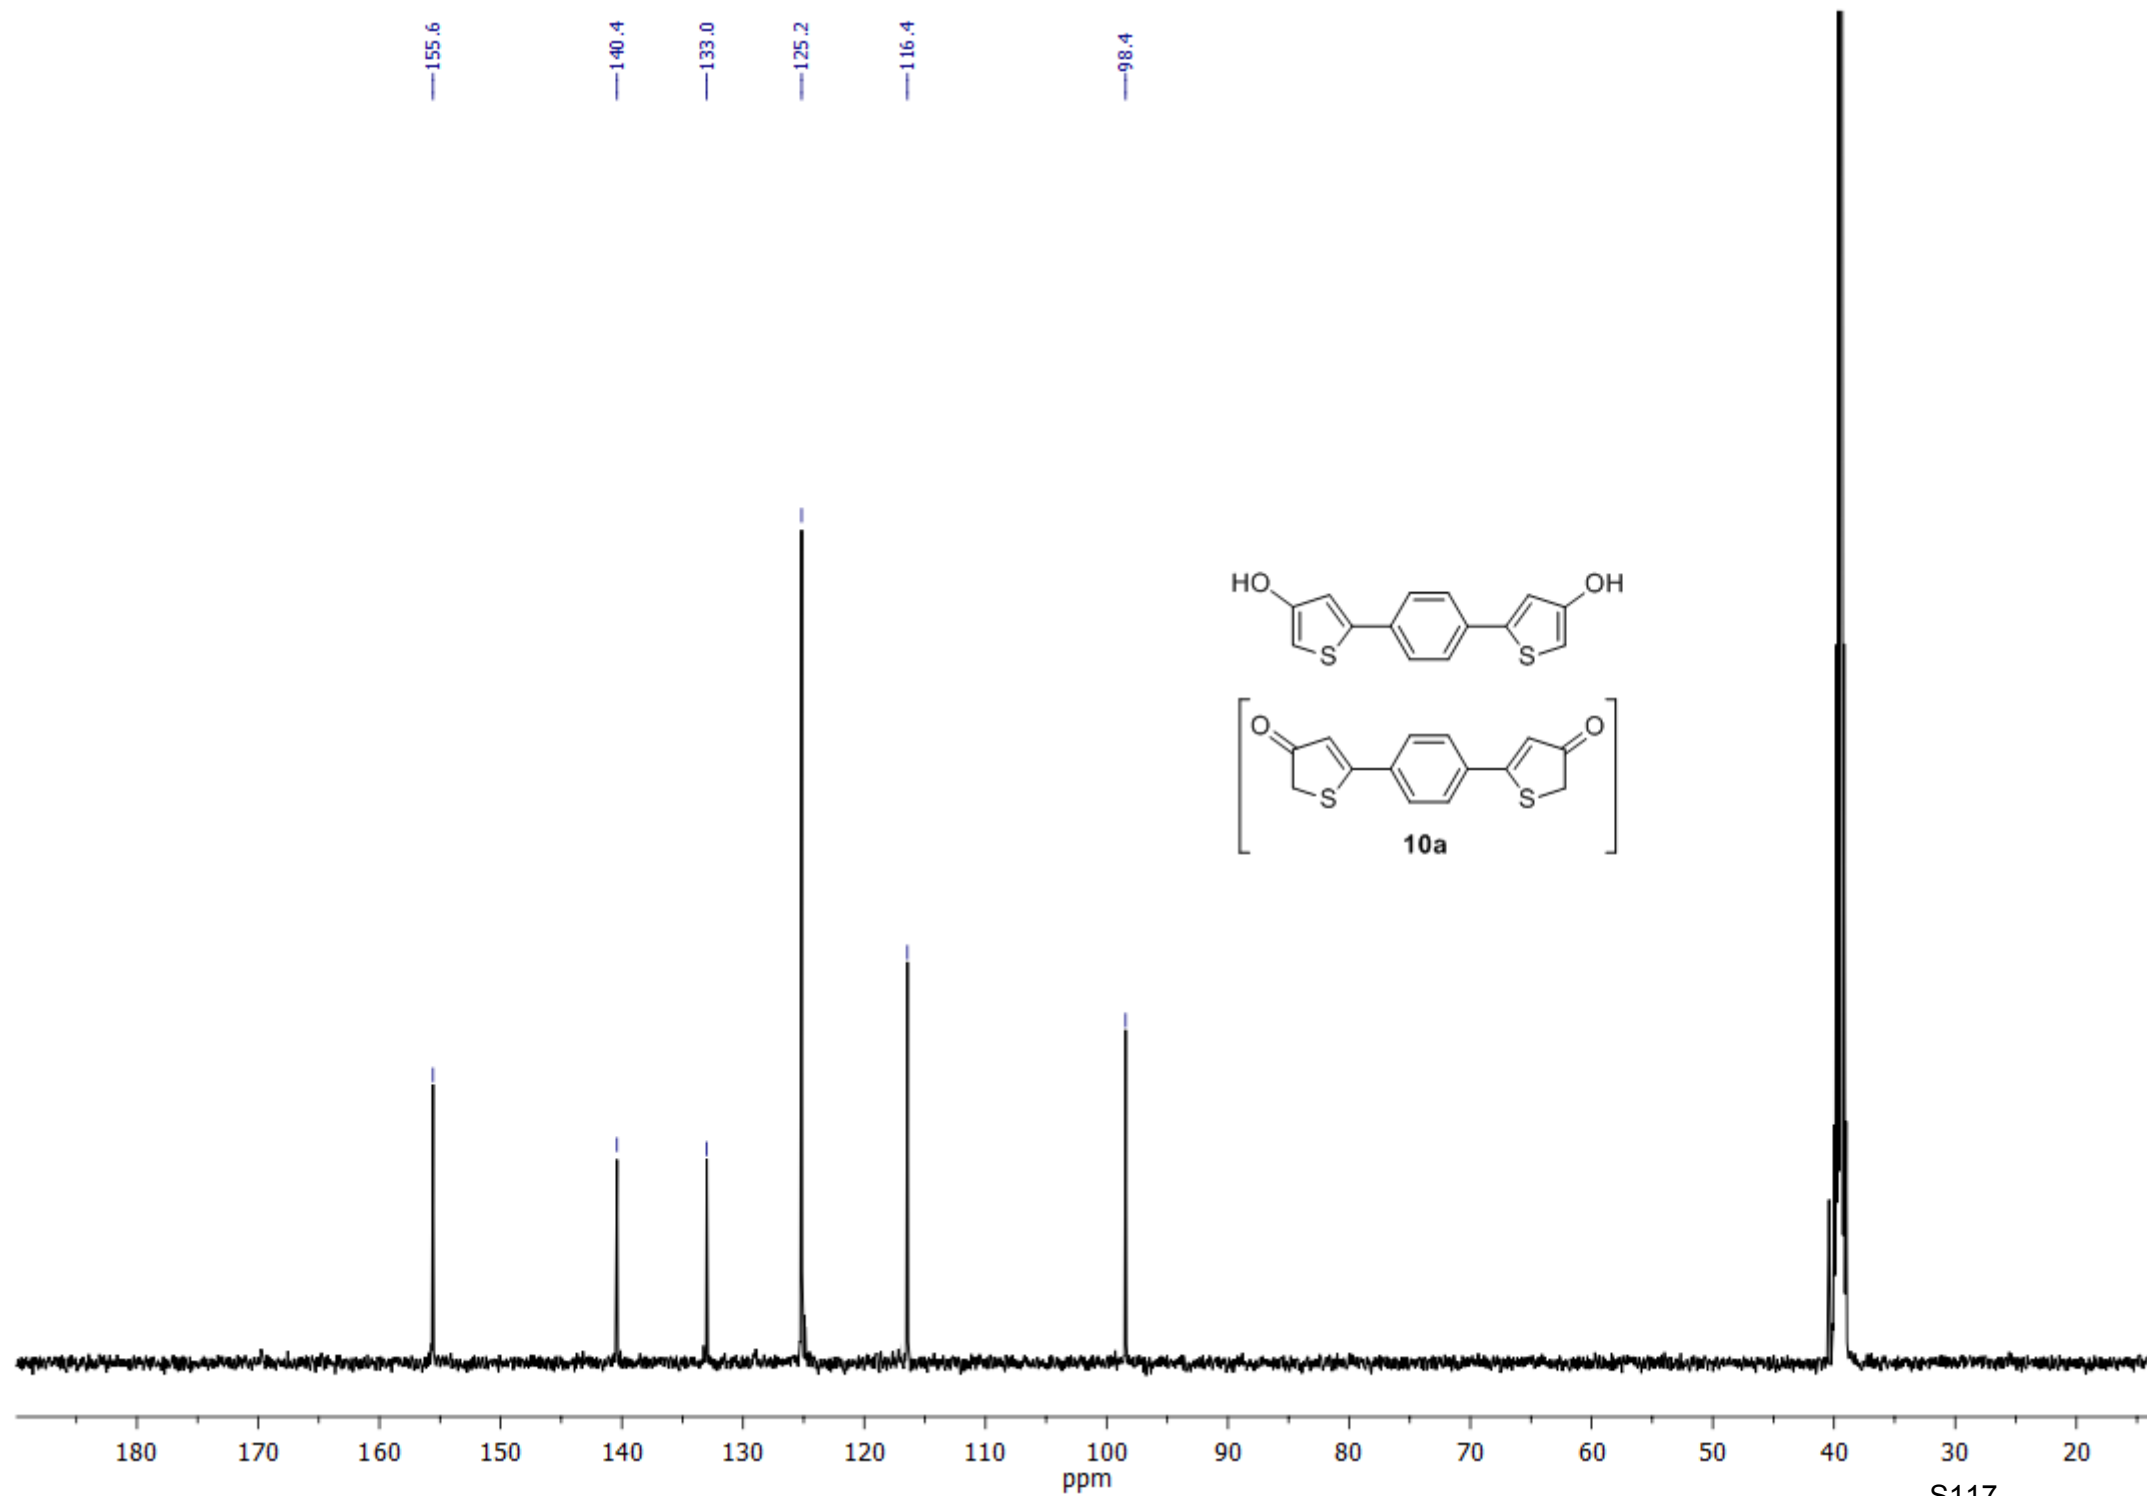

<sup>1</sup>H NMR (solvent: DMSO-*d*<sub>6</sub>), enol (3-hydroxythiophene) form of compound **10b**

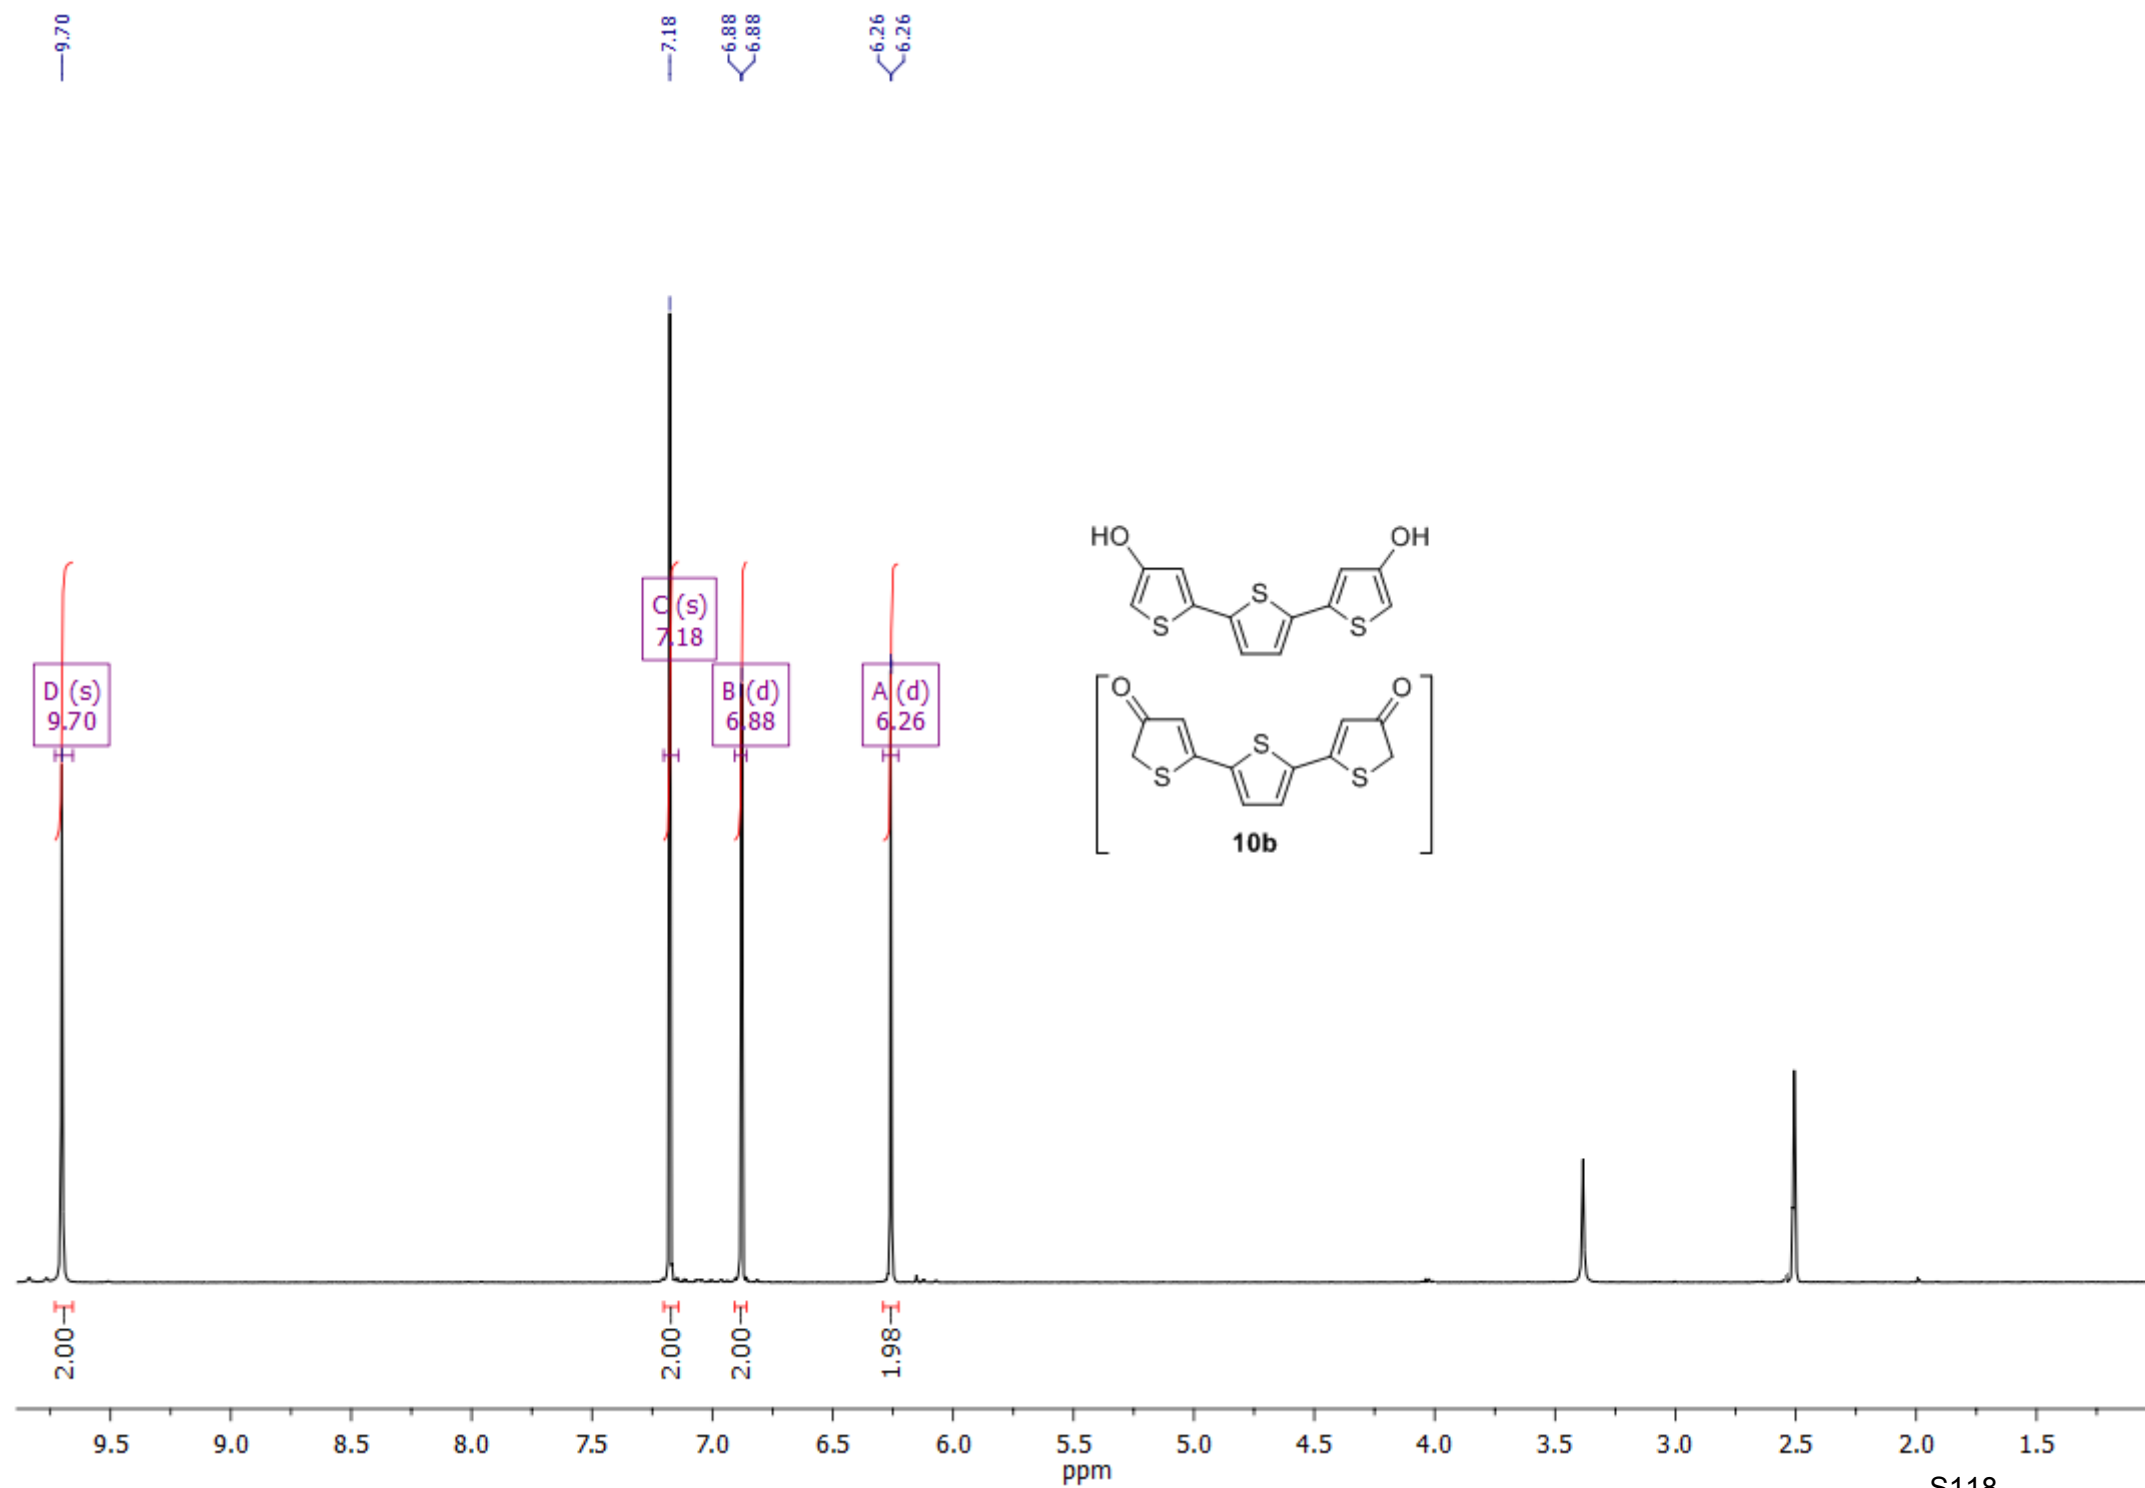

<sup>13</sup>C NMR (solvent: DMSO-*d*<sub>6</sub>), enol (3-hydroxythiophene) form of compound **10b**

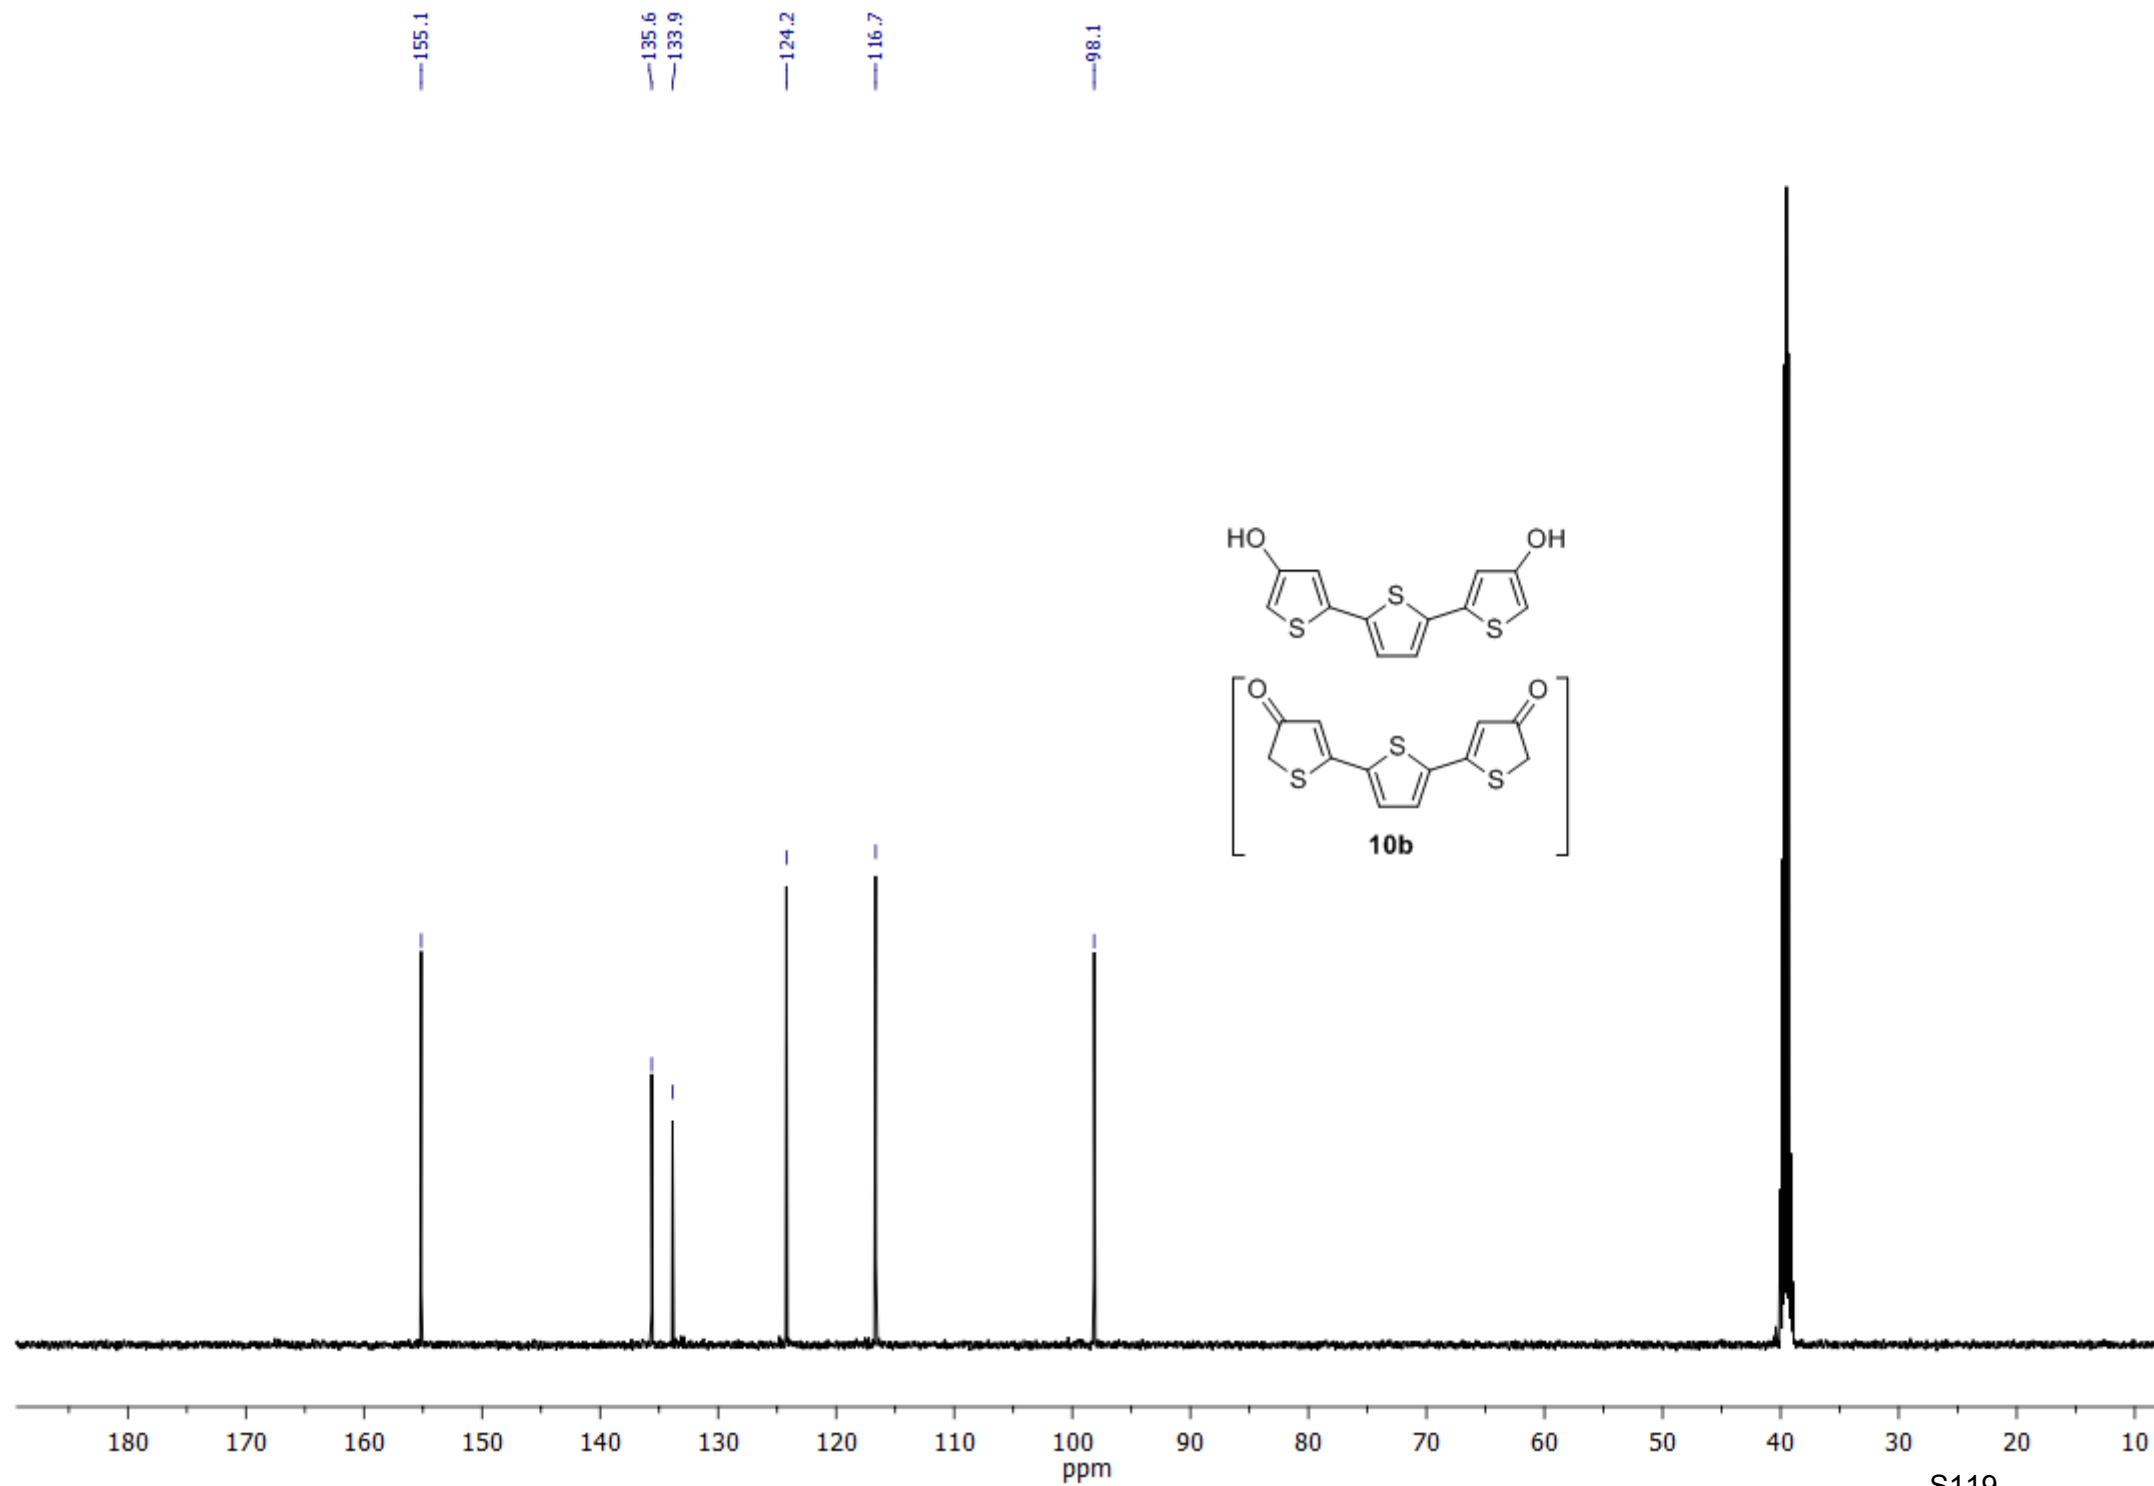

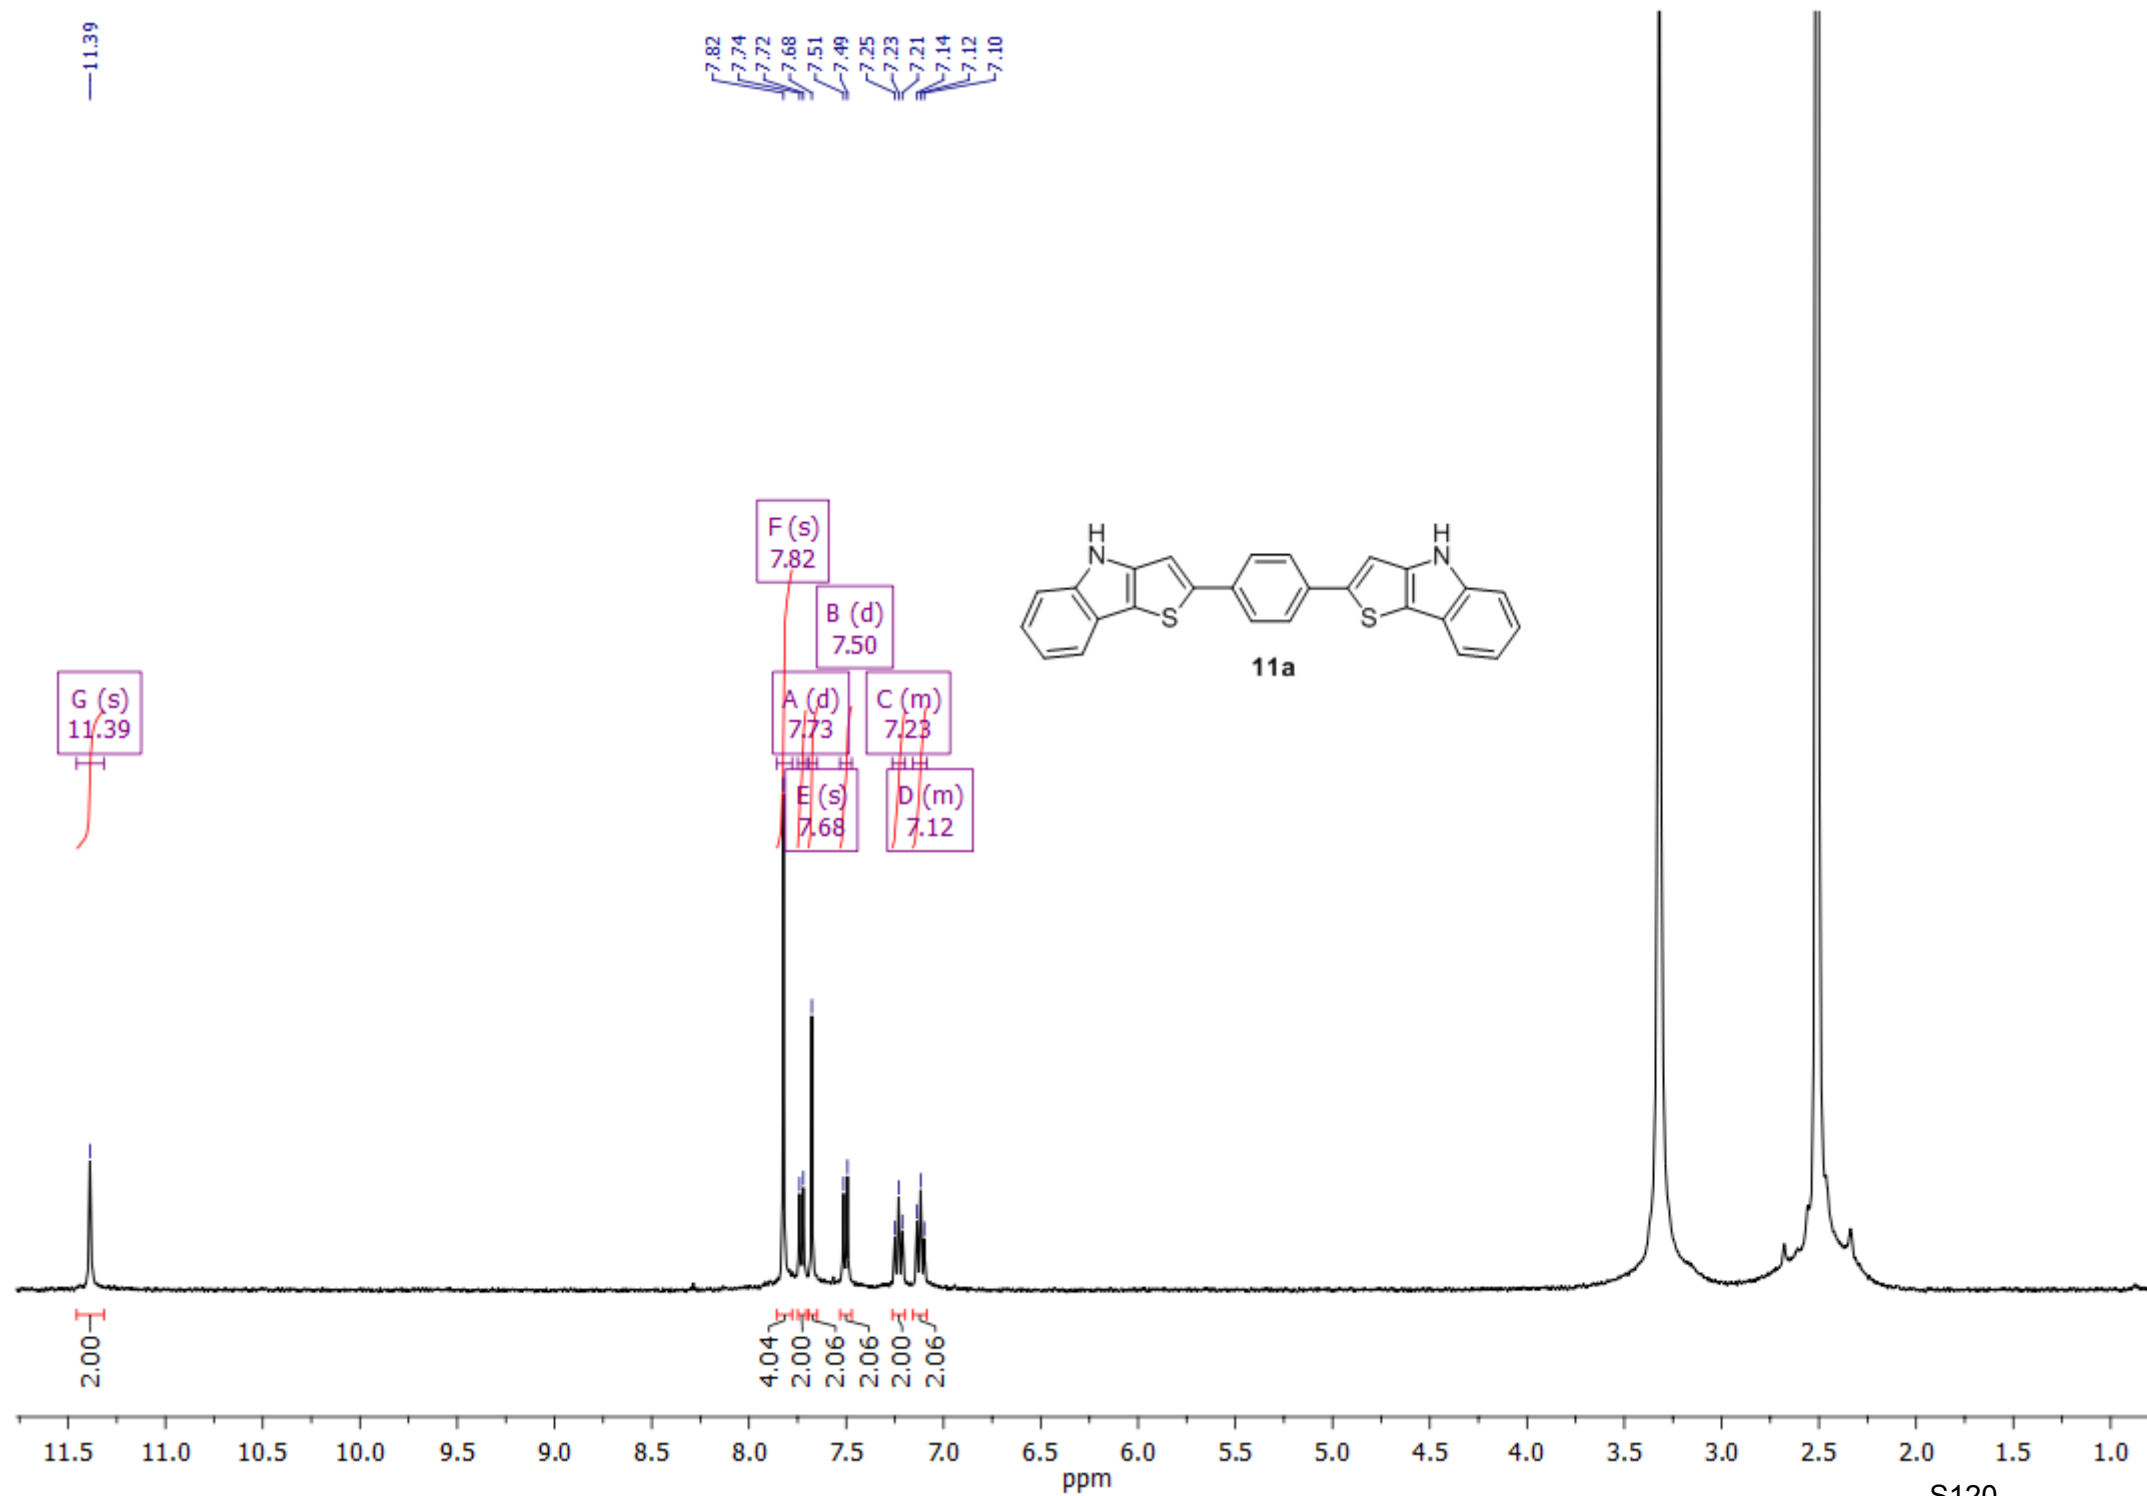



<sup>1</sup>H NMR (solvent: DMSO-*d*<sub>6</sub>)

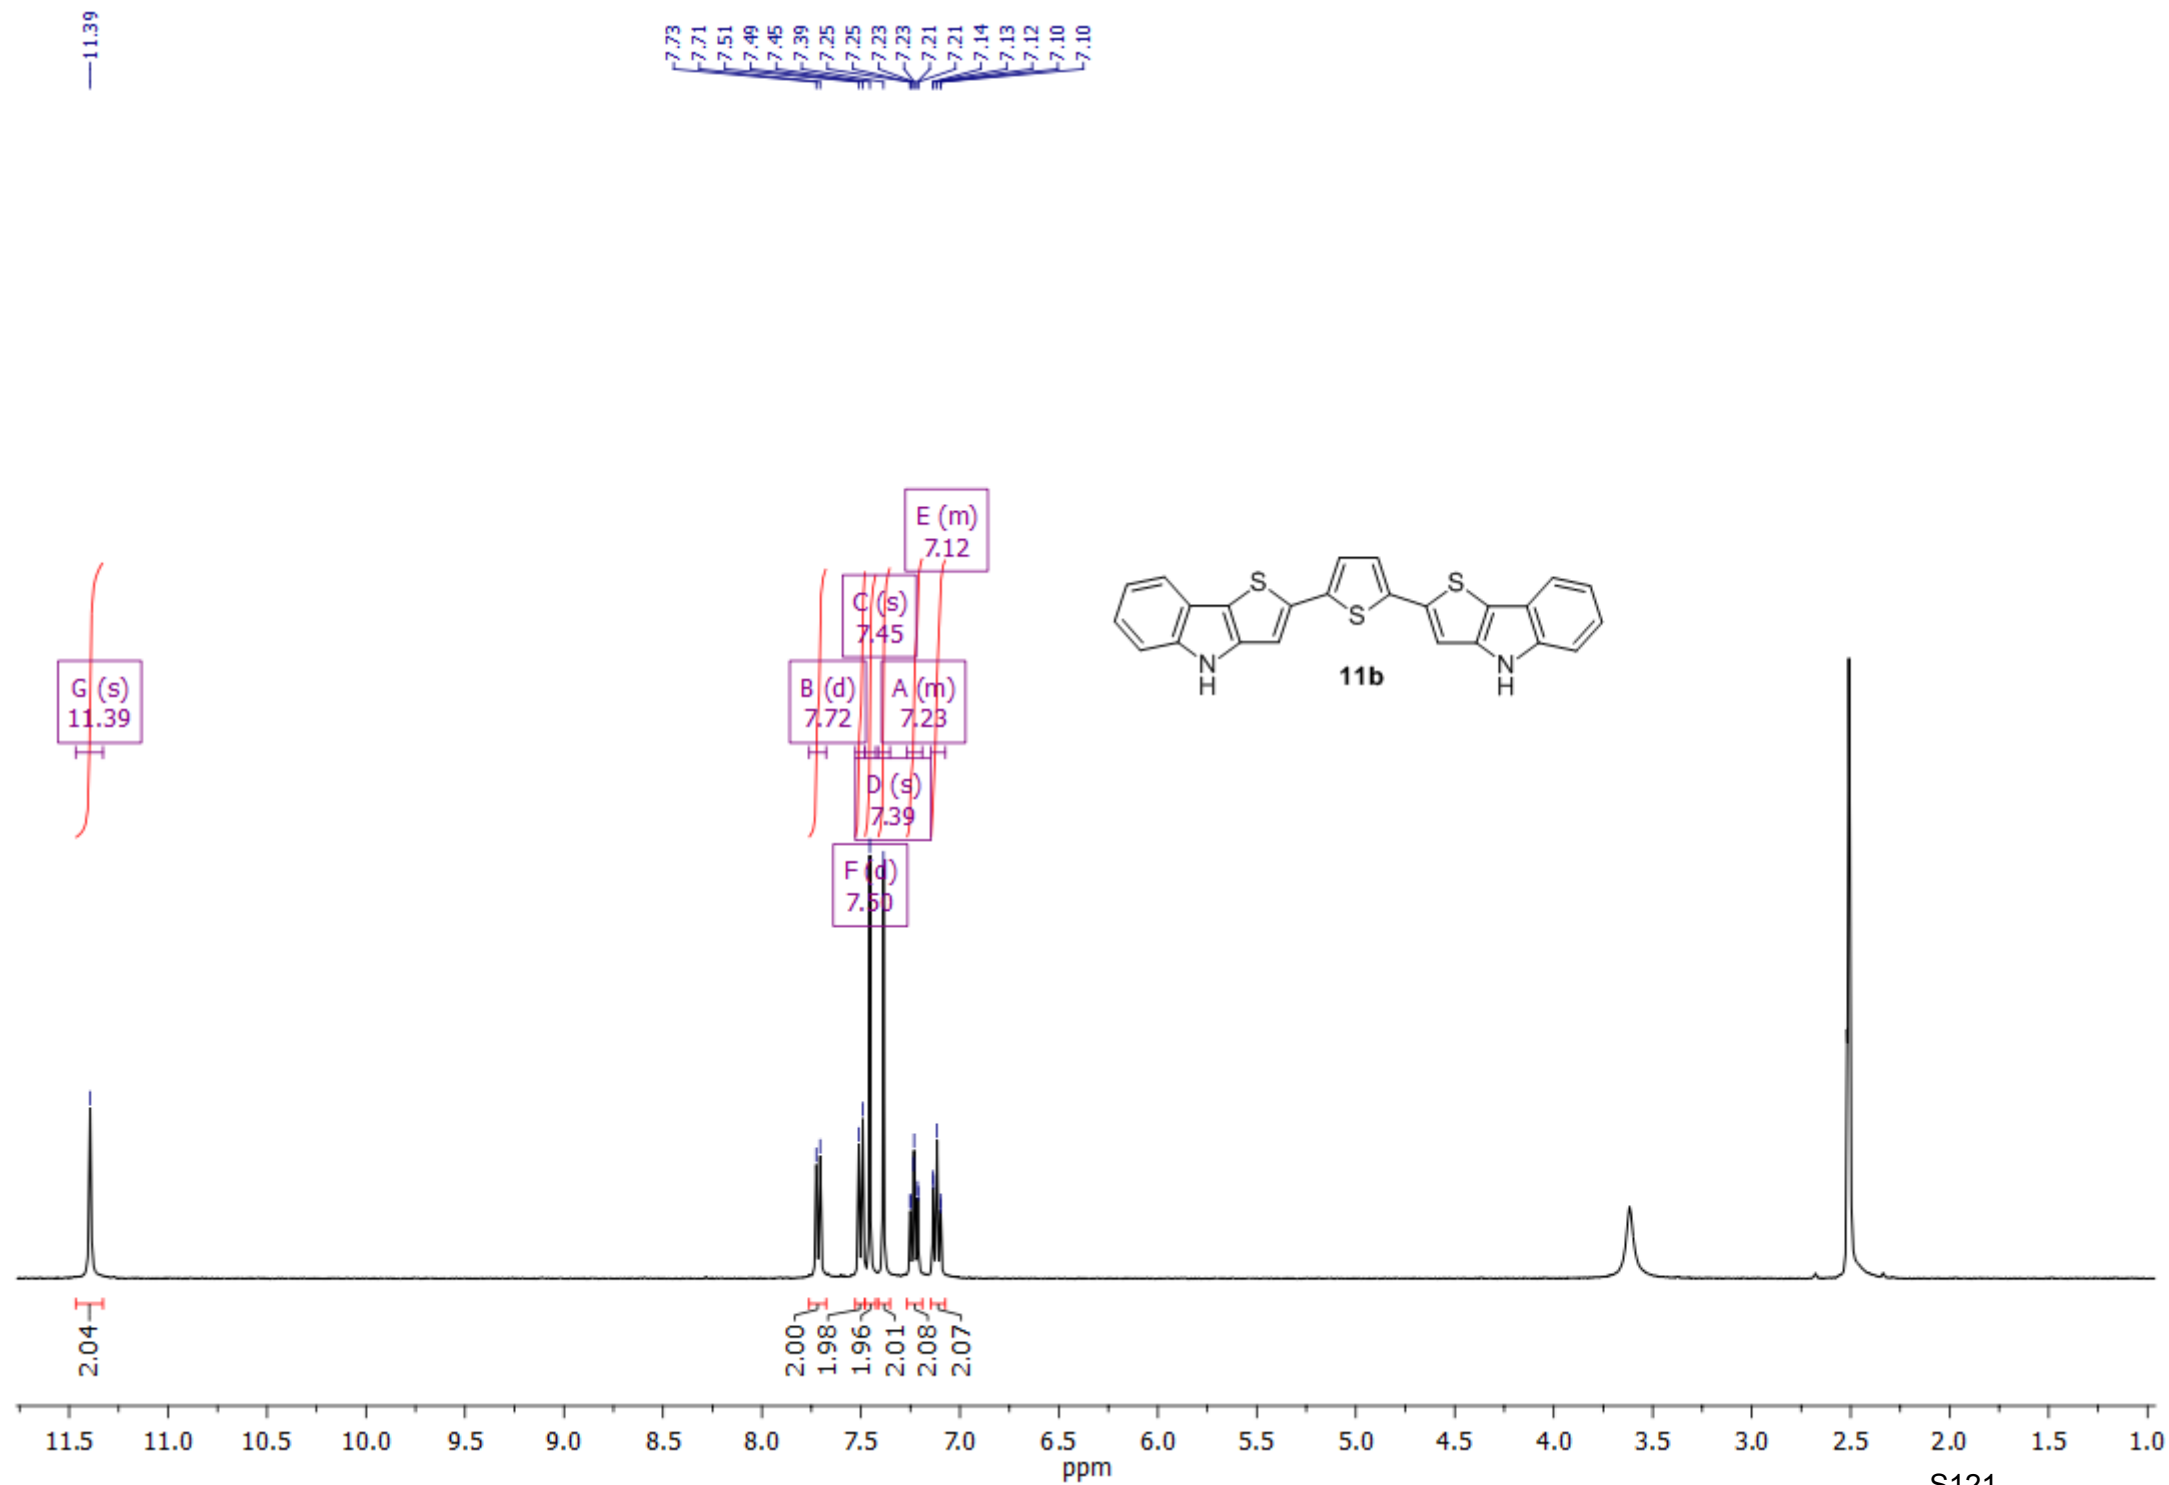

Supplement: c8ob01110a1.pdf [file c8ob01110a1.pdf]
